# Supplementary material for: Visible-light-induced oxidant/additive-free atom-economic synthesis of multifunctionalized cyclopropanes via energy transfer
Source: Royal Society of Chemistry journal article supplement (doi:10.1039/d3cc01021j), 2023-01-01

## Supplementary Information

### **Visible light-induced oxidant/additive-free atom-economic synthesis of multifunctionalized cyclopropanes via energy transfer**

Babasaheb Sopan Gore,<sup>a</sup> and Jeh-Jeng Wang\*<sup>a,b</sup>

<sup>a</sup>Department of Medicinal and Applied Chemistry, Kaohsiung Medical University, No. 100, Shih-Chuan 1st Rd, Sanmin District, Kaohsiung City, 807 (Taiwan).

<sup>b</sup>Department of Medical Research, Kaohsiung Medical University Hospital, No. 100, Tzyou 1st Rd, Sanmin District, Kaohsiung City, 807 (Taiwan).

E-mail: [jjwang@kmu.edu.tw](mailto:jjwang@kmu.edu.tw)

## TABALE OF CONTENTS

|                                                    |      |
|----------------------------------------------------|------|
| TABLE OF CONTENTS .....                            | S1   |
| MATERIALS AND METHODS.....                         | S3   |
| EXPERIMENTAL DATA.....                             | S5   |
| CONTROL STUDIES.....                               | S8   |
| SPECTRAL CHARACTERIZATION.....                     | S11  |
| REFERENCE.....                                     | S29  |
| COPIES OF $^1\text{H}$ , and $^{13}\text{C}$ ..... | S30  |
| X-Ray CRYSTAL DATA.....                            | S112 |

# 1. MATERIALS AND METHODS

All air- and moisture-insensitive reactions were carried out under ambient atmosphere and monitored by thin layer chromatography (TLC). Concentration under reduced pressure was performed by rotary evaporation at 35-45 °C at an appropriate pressure. Purified compounds were further dried under high vacuum. Yields refer to purified and spectroscopically pure compounds, unless otherwise stated. Mass spectra and High-Resolution Mass spectral (HRMS) data was carried out using an Agilent6890N GC (JEOL JMS-700) TOF instrument, and electronic ionization (EI), Chemical ionization (CI), and FAB as ion source at National Taiwan Normal University, Taipei City, Taiwan. Melting points were determined on an EZ-Melt (Automated melting point apparatus).

## Solvents

Bottle grade DMA, PEG-400, CAN, Toluene, MeOH, DMSO were purchased from Alfa acer. Anhydrous DCM was obtained from Phoenix Solvent Drying Systems. All deuterated solvents were purchased from Sigma-Aldrich.

## Chromatography

Thin layer chromatography (TLC) was performed using Merck TLC aluminum sheets (silica gel 60 F254) and visualized by fluorescence quenching under UV light. Flash column chromatography was performed using silica gel (40-63  $\mu\text{m}$  particle size) purchased from Merck.

## Photochemistry

All reactions with blue light were carried out using 1 x 40 W Kessil Blue LED (Kessil A160WE Controllable LED Aquarium Light) lamp purchased from Amazon (Taiwan) with an output centered at a wavelength of approximately  $\lambda_{\text{max}} = 462$  nm. The reaction vials were cooled with a fan while being irradiated under blue light.

See the following links for more details.

[https://www.kessil.com/aquarium/saltwater\\_A160.php](https://www.kessil.com/aquarium/saltwater_A160.php)

[https://www.kessil.com/support/downloadfiles/aquarium/A160WE\\_UserManual.pdf](https://www.kessil.com/support/downloadfiles/aquarium/A160WE_UserManual.pdf)

## Spectroscopy and Instruments

$^1\text{H}$ ,  $^{13}\text{C}$ , and DEPT NMR spectra were recorded on a 400 MHz Varian Unity Plus or Varian Mercury plus spectrometer or JEOL ECS-400. The chemical shift ( $\delta$ ) values are reported in ppm, and the coupling constants (J)

are given in Hz. For  $^1\text{H}$  NMR:  $\text{CDCl}_3$ ,  $\delta$  7.26;  $\text{CD}_3\text{CN}$ ,  $\delta$  1.96;  $\text{CD}_2\text{Cl}_2$ ,  $\delta$  5.32;  $(\text{CD}_3)_2\text{SO}$ ,  $\delta$  2.50; For  $^{13}\text{C}$  NMR:  $\text{CDCl}_3$ ,  $\delta$  77.16; 1.32;  $\text{CD}_2\text{Cl}_2$ ,  $\delta$  53.84;  $(\text{CD}_3)_2\text{SO}$ ,  $\delta$  39.52.<sup>1</sup> The abbreviations used are as follows: s = singlet, d = doublet, t = triplet, q = quartet, dd = doublet of doublet, ddd = doublet of doublet of doublet, dt = doublet of triplets, td = triplet of doublet, m = multiplet, br = broad; coupling constants in Hz; integration.

### **Starting materials**

All substrates were used as received from commercial suppliers, or prepared according to published procedures, respectively, unless otherwise stated. Nickel, Copper, Iron, Ir (III) catalysts, were purchased from Alfa Aesar, and stored in an under vacuum/dark hood cabinet. Aldehydes, Alkenes, N-substituted amines were purchased from Sigma-Aldrich, Acros, TCI, or Alfa Aesar.

## 2. EXPERIMENTAL DATA

### General procedure and reaction condition optimization for cascade cyclopropanation

#### a) General procedure for cyclopropanation

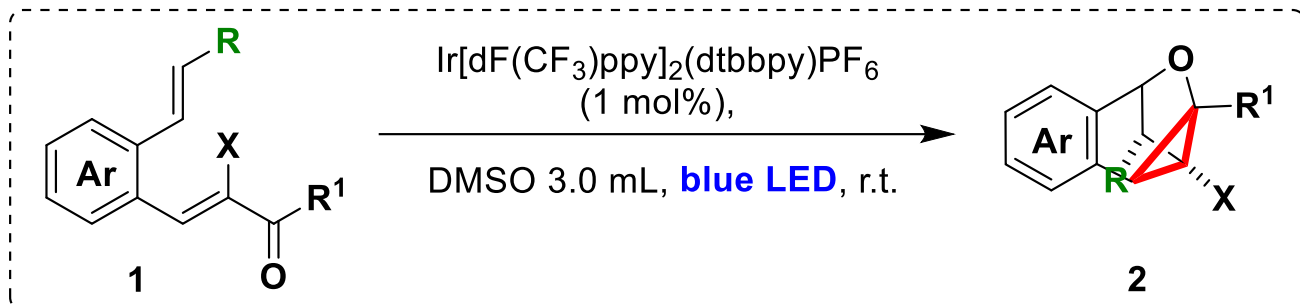

A clean vial (5 mL) equipped with a magnetic stir bar were added to **1** (0.2 mmol), (Ir[dF(CF<sub>3</sub>)ppy]<sub>2</sub>(dtbbpy))PF<sub>6</sub> (1 mol%) and DMSO (3.0 mL) at room temperature, and then placed at a distance of approx. 3 cm from a 40 W blue LED lamp, and the solution was stirred at room temperature under visible-light irradiation for 4-7 h. The progress of the reaction was monitored by thin layer chromatography. When the reaction was complete, water was added to quench the reaction mixture, followed by extraction with ethyl acetate (3×10 mL). Finally, the combined organic layer was dried over Na<sub>2</sub>SO<sub>4</sub>, filtered, and the solvent was removed under reduced pressure. The residue was purified by column chromatography on silica gel eluting with Hex/EA = 97:3 to afford the cyclopropanation product **2** derivatives.

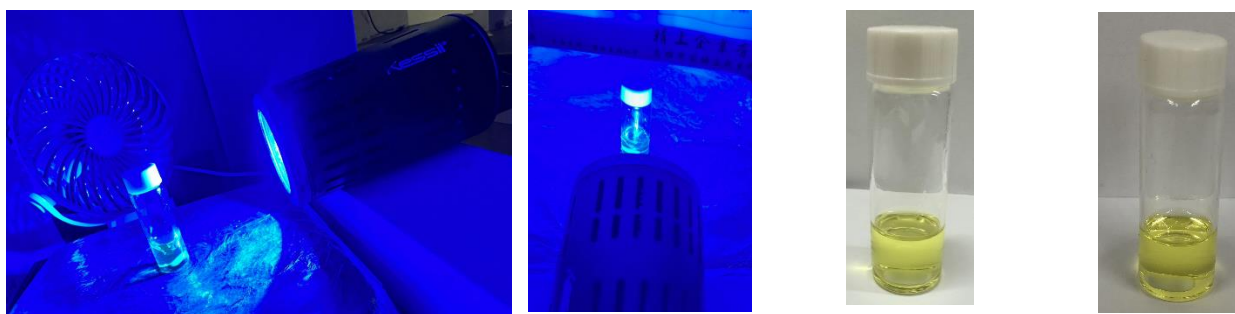

Before reaction **1a** After reaction

**Figure S1: Reaction setup**

#### b) General procedure for gram scale synthesis of **2a**.

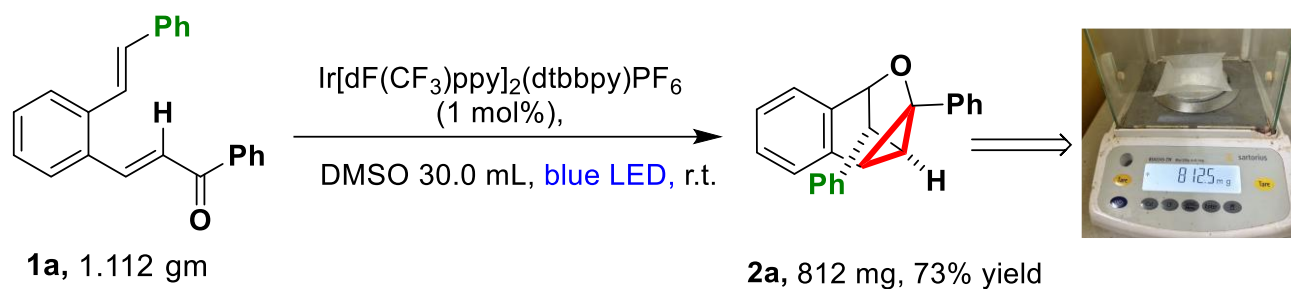

A clean vial (5 mL) equipped with a magnetic stir bar were added to **1a** (3.587 mmol), (Ir[dF(CF<sub>3</sub>)ppy]<sub>2</sub>(dtbbpy))PF<sub>6</sub> (1 mol%) and DMSO (30.0 mL) at room temperature, and then placed at a distance of approx. 3 cm from a 40 W blue LED lamp, and the solution was stirred at room temperature under visible-light irradiation for 10 h. The progress of the reaction was monitored by thin layer chromatography. When the reaction was complete, cold water was added to quench the reaction mixture, followed by extraction with ethyl acetate (10×12 mL). Finally, the combined organic layer was dried over Na<sub>2</sub>SO<sub>4</sub>, filtered, and the solvent was removed under reduced pressure. The residue was purified by column chromatography on silica gel eluting with Hex/EA = 97:3 to afford the cyclopropanation product **2a** derivative in 73% (812 mg) yield.

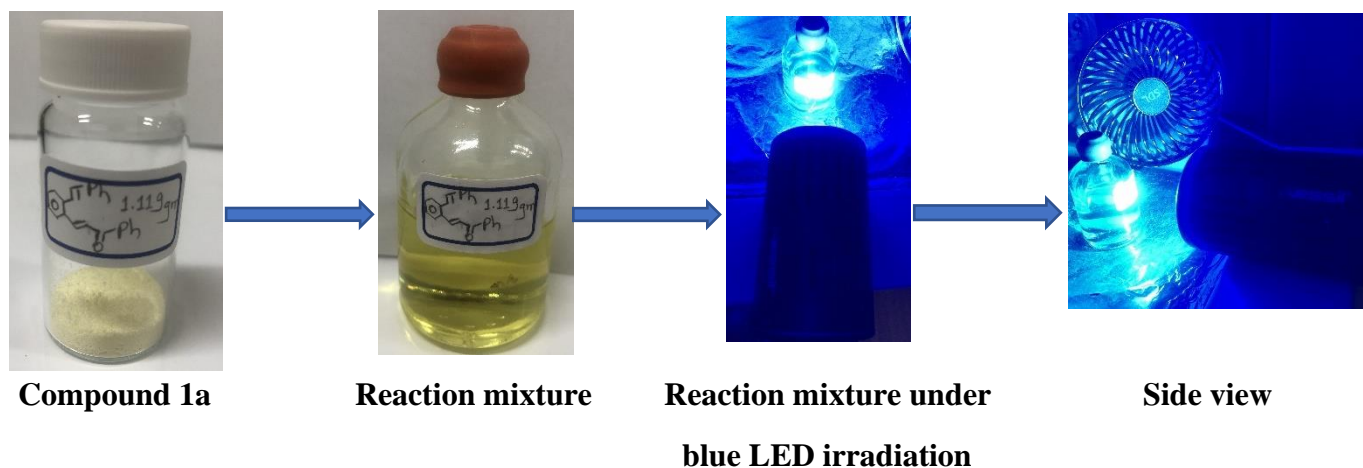

**Figure S2.** Representation of the reaction setup

### c) Substrates synthesis and cyclization reactions

#### 1. General Procedure for the Synthesis of analogous (1).<sup>1</sup>

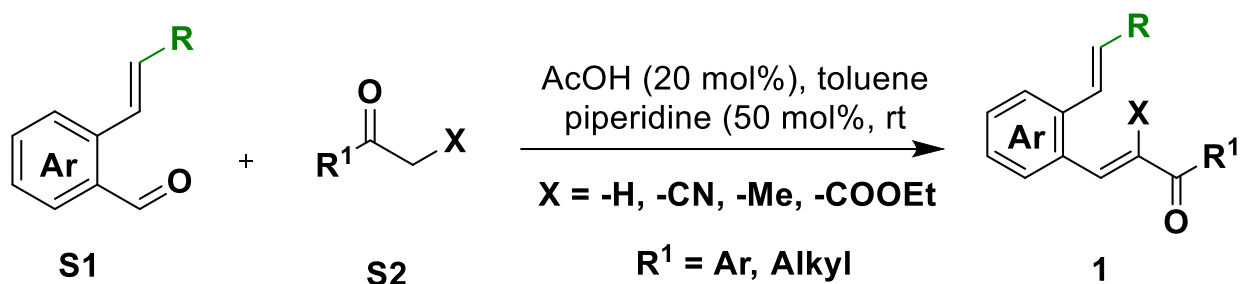

A reaction tube was charged with (*E*)-1-Formyl-2-(2-aryl-(alkene) alkenyl) benzene (**S1**) (1.0 equiv), **S2** derivatives (1.2 equiv), acetic acid (20 mol%) and piperidine (20 mol%), in 3.0 mL of toluene. The reaction suspension was stirred at room temperature and progress of reaction was monitored by TLC. Upon completion water was added to quench the reaction mixture and then extracted with the ethyl acetate (3 × 20 mL). Finally combined organic layer was dried over sodium sulphate, filtered and concentrated in vacuum. The residue was purified by column chromatography on silica gel to afford the corresponding **1** derivative.

### 3. CONTROL STUDIES

#### a. Stern-Volmer Quenching Studies

Further insights into the reaction mechanism were gained by examining the controlling features of visible light-mediated cyclopropanation and dearomatization. Initially, a Stern-Volmer analysis was performed<sup>2</sup> (Figure S3), and the photosensitizer Ir[dF(CF<sub>3</sub>)ppy]<sub>2</sub>(bpy)PF<sub>6</sub> was quenched efficiently with the addition of compound **1q''** (C) or **1q** (D), whereas compound **1q'** (B) devoid of olefin moiety showed no quenching even at an extremely high concentration (500 μL).

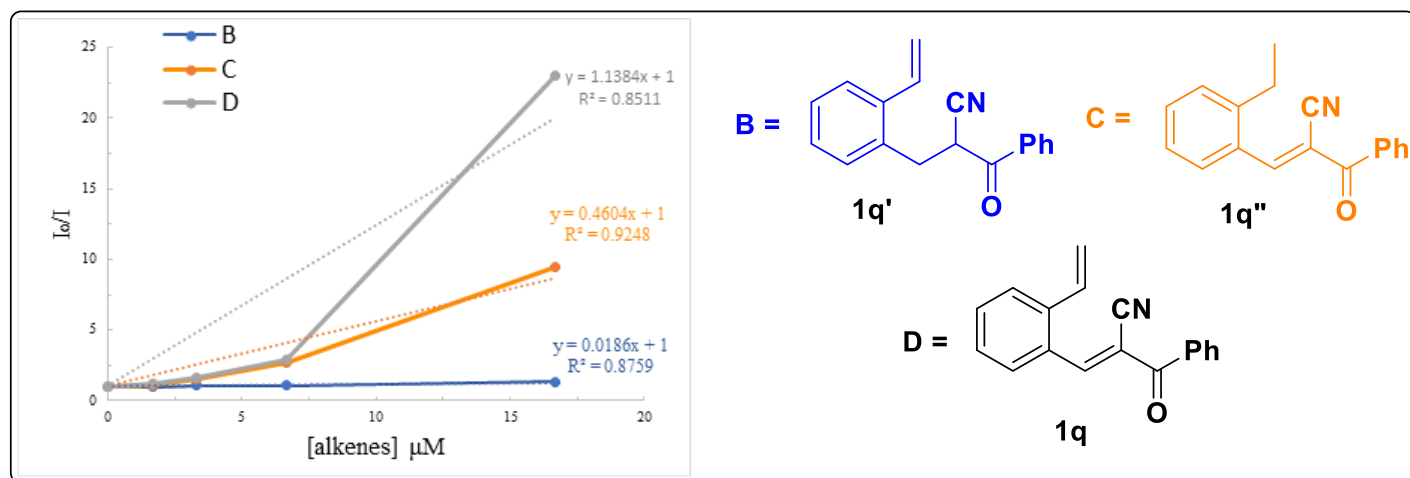

**Figure S3:** Stern-Volmer quenching study of [Ir(dF(CF<sub>3</sub>)ppy)<sub>2</sub>(dtbbpy)]PF<sub>6</sub>. The data were fitted through linear regression: **1q'** (B) ( $y = 1.1384x + 1$ ;  $R^2 = 0.8511$ ); **1q''** (C) ( $y = 0.4604x + 1$ ;  $R^2 = 0.9248$ ); **1q** (D) ( $y = 0.0186x + 1$ ;  $R^2 = 0.8759$ ); blue oval = (**1q'** (B)); orange oval = **1q''** (C); Gray oval = **1q** (D).



## b. Fluorescence Quenching Study

A solution of Ir[dF(CF<sub>3</sub>)ppy]<sub>2</sub>(dtbbpy)PF<sub>6</sub> in acetonitrile at 25 °C was excited at 320 nm and the intensity of emission spectrum was measured at 480 nm (emission maximum). The fluorescence quenching experiments demonstrated that substrates **1a** efficiently quenches the excited state of the Ir photocatalyst under the standard reaction conditions respectively. (Figure S4).

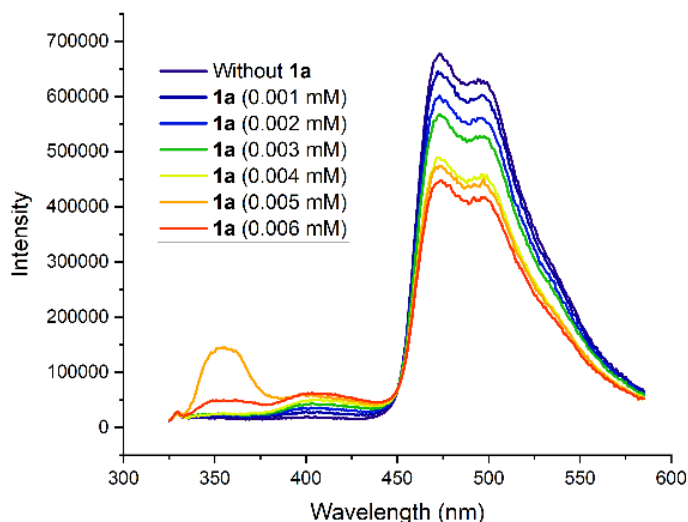

**Figure S4.** Fluorescence quenching of Ir[dF(CF<sub>3</sub>)ppy]<sub>2</sub>(dtbbpy)PF<sub>6</sub> (0.05 mM) with **1a** in acetonitrile.

## c. Light On-Off Experiment (Scheme S1)

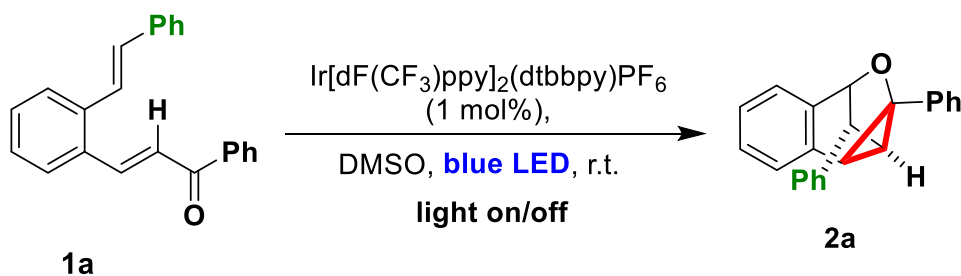

A light on/off experiment was performed separately by using the model reaction of **1a** irradiated under the standard catalytic system respectively. The reaction proceeded over a period of time under alternating cycles of irradiation and darkness (0-200 minutes for product **2a**), and the progress was monitored by TLC analysis. As shown in Figure S5, cyclization product **2a** was only formed under irradiation with blue LEDs (Scheme S1).

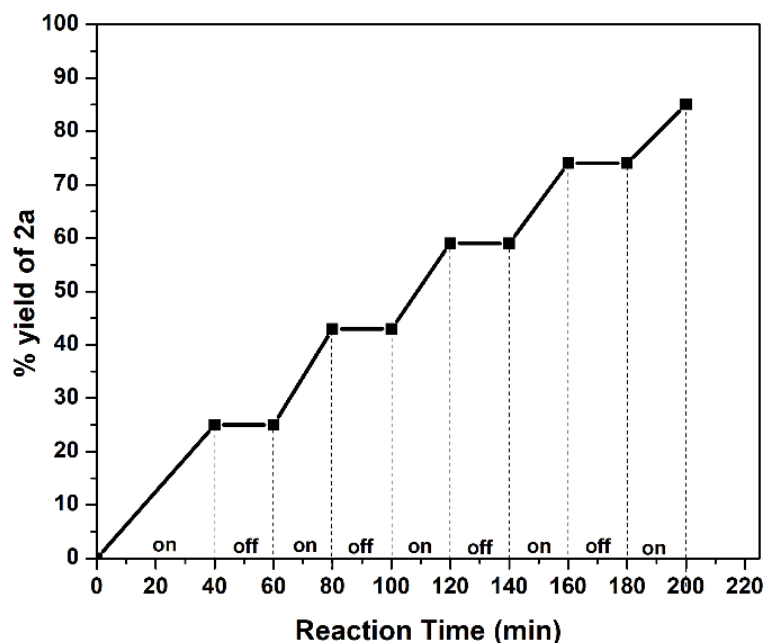

**Figure S5.** Visible-light Irradiation ON/OFF Experiments for product **2a**.

#### d. Control Reactions

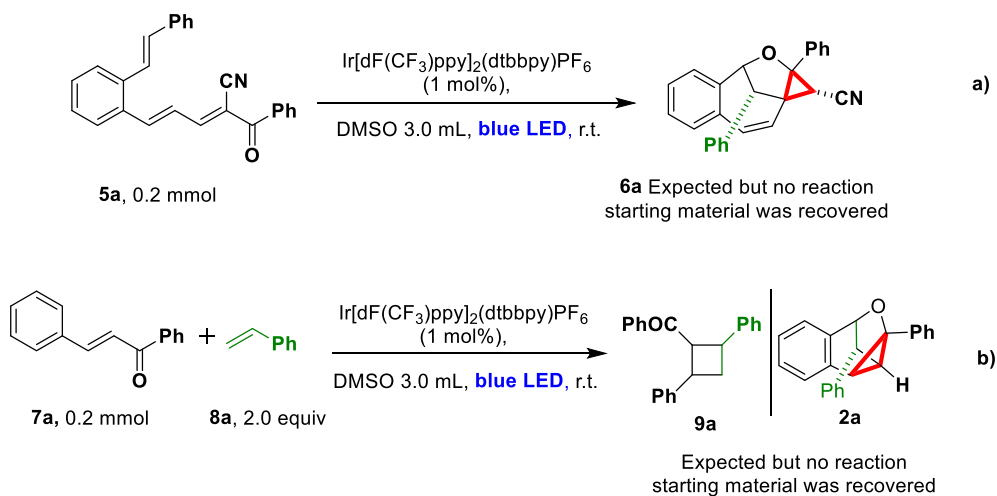

Reaction was carried out according to general procedure a on 0.2 mmol scale. No formation of cyclopropanation fused product **6a** or **9a** or **2a** were observed, and only unreacted starting materials were isolated from the reaction mixture.

## 4. SPECTRAL CHARACTERIZATION

**(E)-1-phenyl-3-(2-((E)-styryl)phenyl)prop-2-en-1-one (1a):** Yield: 91 % (282 mg), pale yellow solid, m.p. 71-

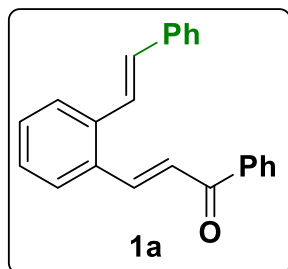

73 °C. Purification by flash column chromatography on silica gel (eluent: EtOAc/Petroleum ether = 0.5/9.5).  $^1\text{H NMR}$  (400 MHz,  $\text{CDCl}_3$ )  $\delta$  8.25 (d,  $J = 15.5$  Hz, 1H), 8.06-7.99 (m, 2H), 7.70-7.65 (m, 1H), 7.62 (d,  $J = 7.6$  Hz, 1H), 7.58-7.43 (m, 7H), 7.41-7.25 (m, 5H), 6.99 (d,  $J = 16.1$  Hz, 1H);  $^{13}\text{C NMR}$  (101 MHz,  $\text{CDCl}_3$ )  $\delta$  190.10, 142.43, 137.99, 136.93, 133.29, 132.78, 132.59, 130.19, 128.66, 128.56, 128.46, 128.02, 127.67, 127.39, 126.93, 126.72, 125.48, 124.21; **HRMS (EI):**  $m/z$  calcd. for  $[\text{M}]^+$   $[\text{C}_{23}\text{H}_{18}\text{NO}]^+$  310.1358, found 310.1360.

**(E)-2-(4-fluorobenzoyl)-3-(2-((E)-styryl)phenyl)acrylonitrile (1j):** Yield: 83 % (293 mg) yellow solid, m.p.

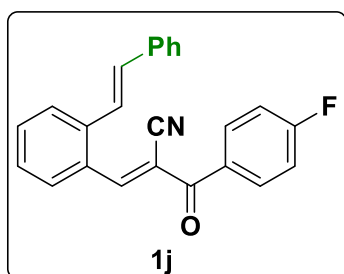

98-100 °C. Purification by flash column chromatography on silica gel (eluent: EtOAc/Petroleum ether = 0.5/9.5).  $^1\text{H NMR}$  (400 MHz,  $\text{CDCl}_3$ )  $\delta$  8.48 (d,  $J = 2.1$  Hz, 1H), 8.18 (t,  $J = 5.4$  Hz, 1H), 7.94 (s, 1H), 7.64 (dd,  $J = 10.6, 7.6$  Hz, 1H), 7.55 (dd,  $J = 14.5, 6.8$  Hz, 1H), 7.47 (s, 2H), 7.43 (dd,  $J = 12.9, 5.3$  Hz, 1H), 7.41-7.36 (m, 2H), 7.31 (d,  $J = 5.9$  Hz, 1H), 7.29-7.21 (m, 1H), 7.12 (d,  $J = 8.3$  Hz, 2H), 6.91 (dd,  $J = 15.9, 2.2$  Hz, 1H);  $^{13}\text{C NMR}$  (101 MHz,  $\text{CDCl}_3$ )  $\delta$  187.17, 167.10, 164.56

(d,  $J_F = 254.6$  Hz), 156.04, 154.59, 139.75, 136.40, 135.51, 132.68, 132.09, 132.00 (d,  $J_F = 9.2$  Hz), 129.87, 128.95, 128.85, 128.69 (d,  $J_F = 16$  Hz), 127.96, 127.72 (d,  $J_F = 24$  Hz), 126.84, 124.70, 116.57, 116.07, 115.85 (d,  $J_F = 22$  Hz), 111.74; **HRMS (EI):**  $m/z$  calcd. for  $[\text{M}]^+$   $[\text{C}_{24}\text{H}_{16}\text{FNO}]^+$  353.1216, found 353.1214.

**(E)-2-(furan-2-carbonyl)-3-(2-((E)-styryl)phenyl)acrylonitrile (1i):** Yield: 88 % (286 mg), yellow solid, m.p.

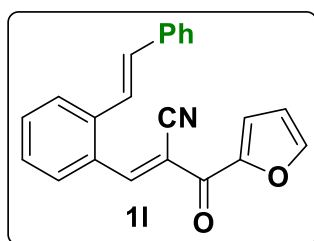

125-127 °C. Purification by flash column chromatography on silica gel (eluent: EtOAc/Petroleum ether = 0.5/9.5).  $^1\text{H NMR}$  (400 MHz,  $\text{CDCl}_3$ )  $\delta$  8.82 (s, 1H), 8.15 (d,  $J = 7.8$  Hz, 1H), 7.75 (d,  $J = 3.7$  Hz, 1H), 7.70-7.62 (m, 2H), 7.53 (dd,  $J = 14.2, 7.4$  Hz, 3H), 7.47-7.29 (m, 5H), 6.92 (d,  $J = 16.0$  Hz, 1H), 6.62 (dd,  $J = 3.6, 1.6$  Hz, 1H);  $^{13}\text{C NMR}$  (101 MHz,  $\text{CDCl}_3$ )  $\delta$  173.04, 154.90, 150.70, 150.63, 148.02, 139.76,

136.50, 135.44, 132.53, 130.03, 129.02, 128.78, 128.55, 127.79, 127.68, 126.89, 124.81, 121.46, 116.78, 114.35, 112.81, 109.97, 109.92; **HRMS (EI):**  $m/z$  calcd. For  $[\text{M}]^+$   $[\text{C}_{22}\text{H}_{15}\text{NO}_2]^+$  325.1103, found 325.1103.

**(E)-2-benzoyl-3-(2-vinylphenyl)acrylonitrile (1o) :** Yield: 70 % (181 mg), pale yellow solid, m.p. 100-102 °C.

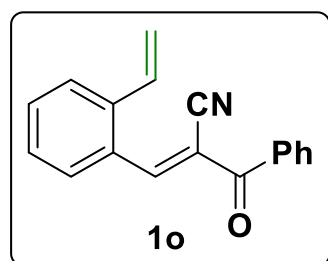

Purification by flash column chromatography on silica gel (eluent: EtOAc/Petroleum ether = 0.5/9.5).  $^1\text{H NMR}$  (400 MHz,  $\text{CDCl}_3$ )  $\delta$  8.42 (s, 1H), 8.21-8.15 (m, 1H), 7.93-7.89 (m, 2H), 7.67-7.61 (m, 1H), 7.57-7.49 (m, 4H), 7.44 (ddd,  $J = 8.4, 6.2, 2.4$  Hz, 1H), 6.90 (dd,  $J = 17.2, 11.0$  Hz, 1H), 5.68-5.44 (m, 2H) ppm;  $^{13}\text{C NMR}$  (101 MHz,  $\text{CDCl}_3$ )  $\delta$  188.66, 154.44, 139.95, 135.72, 133.56, 133.50, 132.55, 129.29,

128.71, 128.67, 128.18, 127.59, 120.64, 116.54, 112.21; **HRMS (EI)**:  $m/z$  calcd. for  $[M]^+$   $[C_{18}H_{13}NO]^+$  259.0997, found 259.0996.

**(E)-2-benzoyl-3-(1-((E)-styryl)naphthalen-2-yl)acrylonitrile (1q)**: Yield: 85 % (327 mg), yellow solid, m.p.

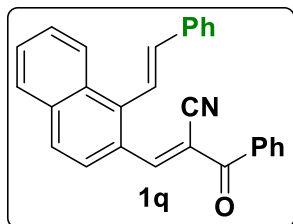

112-114 °C. Purification by flash column chromatography on silica gel (eluent: EtOAc/Petroleum ether = 0.3/9.7). **<sup>1</sup>H NMR** (400 MHz, CDCl<sub>3</sub>) δ 8.52 (s, 1H), 8.33 (d,  $J = 8.8$  Hz, 1H), 8.21-8.13 (m, 1H), 7.95-7.88 (m, 2H), 7.80-7.74 (m, 2H), 7.71-7.53 (m, 5H), 7.48-7.38 (m, 4H), 7.24-7.16 (m, 2H), 6.69 (d,  $J = 16.1$  Hz, 1H); **<sup>13</sup>C NMR** (101 MHz, CDCl<sub>3</sub>) δ 189.86, 156.27, 141.32, 140.52, 136.20, 135.82, 134.83, 132.85, 131.75,

129.02, 128.96, 128.59, 128.52, 128.47, 128.36, 127.89, 127.20, 126.96, 125.88, 124.68, 123.55, 116.70, 111.76;

**HRMS (EI)**:  $m/z$  calcd. for  $[M]^+$   $[C_{28}H_{19}NO]^+$  385.1467, found 385.1470.

**(E)-2-benzoyl-3-(2-((E)-4-methoxystyryl)phenyl)acrylonitrile (1r)**: Yield: 92 % (336 mg) yellow solid, m.p.

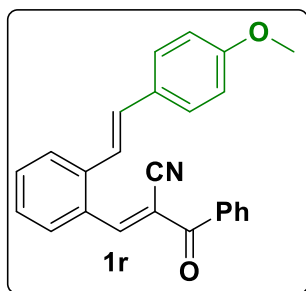

122-124 °C; Purification by flash column chromatography on silica gel (eluent: EtOAc/Petroleum ether = 0.7/9.3). **<sup>1</sup>H NMR** (400 MHz, CDCl<sub>3</sub>) δ 8.47 (s, 1H), 8.19 (d,  $J = 7.8$  Hz, 1H), 7.95-7.87 (m, 2H), 7.61 (ddd,  $J = 7.0, 5.1, 4.0$  Hz, 2H), 7.56-7.41 (m, 6H), 7.11 (d,  $J = 16.0$  Hz, 1H), 6.94-6.83 (m, 3H), 3.86 (d,  $J = 7.9$  Hz, 3H); **<sup>13</sup>C NMR** (101 MHz, CDCl<sub>3</sub>) δ 189.06, 160.05, 154.74, 140.05, 135.85, 134.99, 133.35, 132.55, 129.73, 129.48, 129.31, 129.26, 128.97, 128.66, 128.22, 127.56, 127.46,

122.50, 116.53, 114.25, 112.05, 77.31, 76.99, 76.68, 55.37; **HRMS (EI)**:  $m/z$  calcd. for  $[M]^+$   $[C_{25}H_{19}NO_2]^+$  365.1416, found 365.1414.

**(E)-2-benzoyl-3-(2-((E)-4-chlorostyryl)phenyl)acrylonitrile (1t)**: Yield: 86 % (317 mg), yellow solid, m.p.

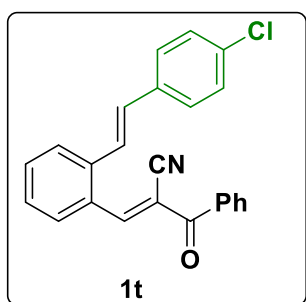

131-133 °C. Purification by flash column chromatography on silica gel (eluent: EtOAc/Petroleum ether = 0.5/9.5). **<sup>1</sup>H NMR** (400 MHz, CDCl<sub>3</sub>) δ 8.46 (s, 1H), 8.19 (d,  $J = 7.7$  Hz, 1H), 7.95-7.88 (m, 2H), 7.68-7.60 (m, 2H), 7.55 (td,  $J = 7.7, 1.1$  Hz, 1H), 7.51-7.45 (m, 3H), 7.43-7.38 (m, 2H), 7.37-7.33 (m, 2H), 7.26-7.20 (m, 1H), 6.87 (d,  $J = 16.0$  Hz, 1H); **<sup>13</sup>C NMR** (101 MHz, CDCl<sub>3</sub>) δ 188.77, 154.32, 139.20, 135.74, 134.96, 134.30, 133.87, 133.49, 132.60, 130.02, 129.47, 129.27, 129.01, 128.68,

128.17, 128.01, 127.61, 125.30, 116.44, 112.41; **HRMS (EI)**:  $m/z$  calcd. for  $[M]^+$   $[C_{24}H_{16}ClNO]^+$  369.0920, found 369.0918.

**(E)-2-benzoyl-3-(2-((E)-2-(naphthalen-2-yl)vinyl)phenyl)acrylonitrile (1f)** : Yield: 90 % (346.5 mg), yellow

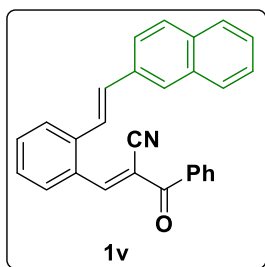

solid, m.p. 138-139 °C. Purification by flash column chromatography on silica gel (eluent: EtOAc/Petroleum ether = 0.3/9.7).  $^1\text{H NMR}$  (400 MHz,  $\text{CDCl}_3$ ) :  $\delta$  8.47 (s, 1H), 8.19 (dd,  $J = 7.9, 1.2$  Hz, 1H), 7.93-7.76 (m, 5H), 7.70-7.60 (m, 2H), 7.597.38 (m, 8H), 7.31 (d,  $J = 15.9$  Hz, 1H), 7.04 (d,  $J = 16.0$  Hz, 1H) ppm;  $^{13}\text{C NMR}$  (101 MHz,  $\text{CDCl}_3$ )  $\delta$  189.02, 154.42, 139.53, 135.74, 135.21, 133.84, 133.45, 133.33, 132.56, 129.86, 129.22, 128.95, 128.63, 128.47, 128.10, 127.91, 127.69, 127.52, 127.49, 126.54, 126.43, 124.78, 123.20, 116.41, 112.29; **HRMS (EI)**: m/z calcd. for  $[\text{M}]^+$   $[\text{C}_{28}\text{H}_{19}\text{NO}]^+$  385.1467, found 385.1469.

**(E)-2-benzoyl-3-(2-((E)-2-cyclopropylvinyl)phenyl)acrylonitrile (1x)**: Yield: 62 % (185.4 mg), pale yellow

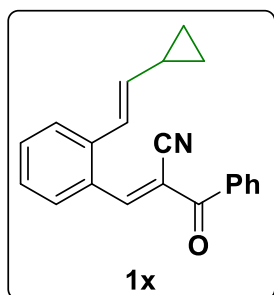

solid, m.p. 88-89 °C. Purification by flash column chromatography on silica gel (eluent: EtOAc/Petroleum ether = 0.2/9.8).  $^1\text{H NMR}$  (400 MHz,  $\text{CDCl}_3$ ) :  $\delta$  8.43 (s, 1H), 8.15 (ddd,  $J = 7.9, 1.4, 0.7$  Hz, 1H), 7.95-7.88 (m, 2H), 7.68-7.59 (m, 1H), 7.57-7.50 (m, 2H), 7.49-7.44 (m, 1H), 7.44-7.40 (m, 1H), 7.35 (td,  $J = 7.5, 6.9, 1.8$  Hz, 1H), 6.61 (d,  $J = 15.5$  Hz, 1H), 5.48 (dd,  $J = 15.5, 9.2$  Hz, 1H), 1.65-1.52 (m, 1H), 0.93-0.80 (m, 2H), 0.56-0.47 (m, 2H) ppm;  $^{13}\text{C NMR}$  (101 MHz,  $\text{CDCl}_3$ ):  $\delta$  188.90, 155.06, 142.81, 140.25, 135.89, 133.36, 132.49, 129.25, 129.06, 128.71, 128.62, 127.32, 126.98, 123.62, 116.70, 111.39, 15.22, 7.82; **HRMS (ESI)**: m/z calcd. for  $[\text{M}+\text{H}]^+$   $[\text{C}_{21}\text{H}_{18}\text{NO}]^+$  300.1388, found 300.1390.

**(E)-1-(pyridin-3-yl)-3-(2-((E)-styryl)phenyl)prop-2-en-1-one (1y)**: Yield: 75 % (286.5 mg), light yellow solid,

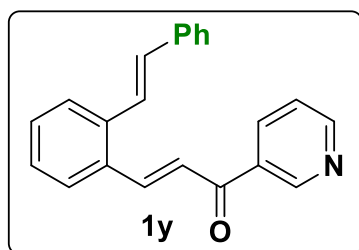

m.p. 125-130 °C. Purification by flash column chromatography on silica gel (eluent: EtOAc/Petroleum ether = 1/9).  $^1\text{H NMR}$  (400 MHz,  $\text{CDCl}_3$ )  $\delta$  9.30-9.21 (m, 1H), 8.80 (dd,  $J = 4.8, 1.7$  Hz, 1H), 8.39-8.24 (m, 2H), 7.68 (dd,  $J = 23.1, 7.7$  Hz, 2H), 7.58-7.27 (m, 10H), 7.01 (d,  $J = 16.1$  Hz, 1H);  $^{13}\text{C NMR}$  (101 MHz,  $\text{CDCl}_3$ )  $\delta$  188.68, 153.19, 149.76, 143.60, 138.39, 136.86, 135.84, 133.36, 133.07, 132.83, 130.68, 128.73, 128.17, 127.78, 127.39, 127.15, 126.77, 125.27, 123.61, 123.22; **HRMS (EI)**: m/z calcd. for  $[\text{M}]^+$   $[\text{C}_{22}\text{H}_{17}\text{NO}]^+$  311.3840, found 311.3838.

**1-phenyl-2-((E)-2-((E)-styryl)benzylidene)pentane-1,3-dione (1z)**: Yield: 75 % (286.5 mg), light yellow solid,

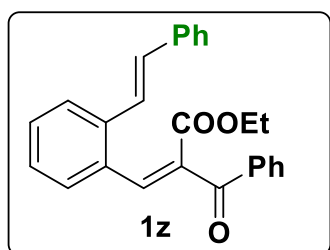

m.p. 125-130 °C. Purification by flash column chromatography on silica gel (eluent: EtOAc/Petroleum ether = 1/9).  $^1\text{H NMR}$  (400 MHz,  $\text{CDCl}_3$ )  $\delta$  8.36 (s, 1H), 7.91-7.83 (m, 2H), 7.60-7.46 (m, 4H), 7.44-7.29 (m, 6H), 7.26-7.17 (m, 2H), 7.06-6.95 (m, 2H), 4.25 (q,  $J = 7.1$  Hz, 2H), 1.19 (t,  $J = 7.1$  Hz, 3H);  $^{13}\text{C NMR}$  (101 MHz,  $\text{CDCl}_3$ )  $\delta$  194.76, 164.84, 141.80, 137.42, 136.99, 136.45, 133.57, 133.20, 132.82, 131.58, 129.96, 129.32, 129.04, 128.76, 128.58, 128.18, 127.45, 126.84, 126.46, 125.48, 61.57, 14.01; **HRMS (EI)**: m/z calcd. for  $[\text{M}]^+$   $[\text{C}_{26}\text{H}_{22}\text{O}_2]^+$  366.1620, found 366.1617.

**Synthesis of 3-oxo-3-phenyl-2-(2-vinylbenzyl)propanenitrile (1q')**: To a stirred solution of

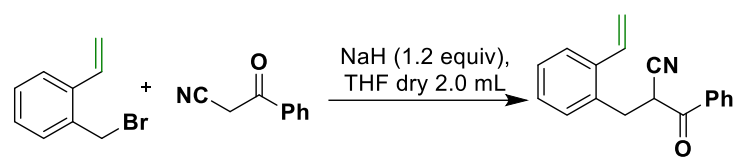

**1q' mixture of isomers**

of cyanoacetophenone (0.4 mmol, 1.2 equiv.) in THF (2 mL, dry) was added NaH (60% in mineral oil). The mixture was stirred for 20 min at 0 °C.

1-(bromomethyl)-2-vinylbenzene (0.5 mmol) in THF (dry) was added and the reaction mixture was stirred for another 8 h. Upon completion, the reaction was quenched with aqueous NH<sub>4</sub>Cl and extracted with ethyl acetate three times. The organics were combined, dried over anhydrous Na<sub>2</sub>SO<sub>4</sub>, concentrated under reduced pressure. The residue was purified by flash column chromatography on silica gel with a gradient eluent of petroleum ether/ethyl acetate to affording the final product (**1q'**) (38% yield). <sup>1</sup>H NMR (597 MHz, CDCl<sub>3</sub>) δ 7.58 (d, *J* = 7.6 Hz, 1H), 7.54-7.36 (m, 3H), 7.33 (ddt, *J* = 15.0, 8.5, 4.3 Hz, 2H), 7.27-7.19 (m, 3H), 7.01 (dt, *J* = 11.0, 7.3 Hz, 1H), 6.97 (d, *J* = 11.0 Hz, 1H), 5.72 (dd, *J* = 17.3, 1.1 Hz, 1H), 5.60-5.53 (m, 1H), 5.38 (dd, *J* = 11.0, 1.1 Hz, 1H), 5.31 (dd, *J* = 10.9, 1.3 Hz, 1H), 5.04 (s, 1H), 4.94 (s, 1H), 3.62 (d, *J* = 14.1 Hz, 1H), 3.39 (d, *J* = 14.1 Hz, 1H); <sup>13</sup>C NMR (150 MHz, CDCl<sub>3</sub>) δ 197.37, 138.27, 136.63, 134.53, 133.45, 132.77, 132.22, 131.92, 131.18, 131.11, 129.57, 129.20, 128.68, 128.52, 128.09, 127.90, 127.88, 126.74, 126.64, 126.25, 120.91, 117.34, 117.09, 72.72, 72.08, 55.04, 39.95, 29.68; Yield: 92 % (181.4 mg), colorless liquid; HRMS (EI): *m/z* calcd. for [M]<sup>+</sup> [C<sub>18</sub>H<sub>15</sub>NO]<sup>+</sup> 261.1154, found 261.1156.

**(E)-2-benzoyl-3-(2-ethylphenyl)acrylonitrile (1q'')**: A reaction tube was charged with 2-ethylbenzaldehyde

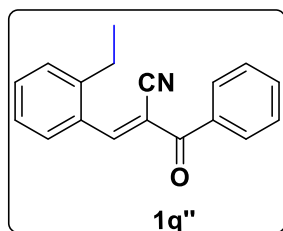

(1.0 equiv), benzoyacetonitrile (1.5 equiv), AcOH (20 mol%) and piperidine (20 mol%) in 5.0 mL of toluene. The reaction suspension was stirred at room temperature, and the progress of the reaction was monitored by TLC. Upon completion, water was added to quench the reaction mixture, which was then extracted with ethyl acetate (3×15 mL).

Finally, the combined organic layer was dried over sodium sulfate, filtered, and concentrated under vacuum. The residue was purified by column chromatography on silica gel to afford the **1q''**.

<sup>1</sup>H NMR (400 MHz, CDCl<sub>3</sub>) δ 8.39 (d, *J* = 6.6 Hz, 1H), 8.22 (d, *J* = 7.5 Hz, 1H), 7.91 (dd, *J* = 5.2, 3.3 Hz, 2H), 7.68-7.60 (m, 1H), 7.57-7.43 (m, 3H), 7.39-7.30 (m, 2H), 2.73 (q, *J* = 7.6 Hz, 2H), 1.25-1.15 (m, 3H); <sup>13</sup>C NMR (101 MHz, CDCl<sub>3</sub>) δ 188.90, 153.91, 145.79, 135.74, 133.41, 132.92, 130.09, 129.40, 129.22, 128.68, 128.61, 126.67, 116.63, 111.79, 26.64, 15.81; Yield: 95 %, pale yellow solid, m.p. 134-136 °C; HRMS (EI): *m/z* calcd. for [M]<sup>+</sup> [C<sub>18</sub>H<sub>15</sub>NO]<sup>+</sup> 261.1154, found 261.1155.

**(E)-2-benzoyl-3-(3-((E)-styryl)thiophen-2-yl)acrylonitrile (1aa):** Yield: 75 % (286.5 mg), light yellow solid,

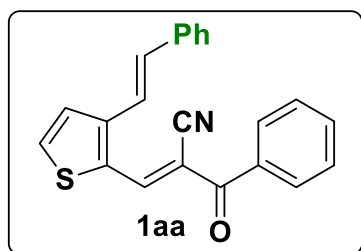

m.p. 125-130 °C. Purification by flash column chromatography on silica gel (eluent: EtOAc/Petroleum ether = 1/9).  $^1\text{H NMR}$  (400 MHz,  $\text{CDCl}_3$ )  $\delta$  8.70 (s, 1H), 7.93 (d,  $J = 7.4$  Hz, 2H), 7.75 (d,  $J = 5.1$  Hz, 1H), 7.67-7.28 (m, 9H), 7.16 (d,  $J = 16.0$  Hz, 1H);  $^{13}\text{C NMR}$  (101 MHz,  $\text{CDCl}_3$ )  $\delta$  188.32, 149.37, 144.99, 136.38, 136.03, 134.96, 134.48, 133.09, 131.54, 129.03, 129.00, 128.88, 128.50, 127.02,

126.27, 118.97, 117.97, 104.58, 24.60; **HRMS (EI):**  $m/z$  calcd. for  $[\text{M}]^+$   $[\text{C}_{22}\text{H}_{15}\text{NOS}]^+$  341.4280, found 341.4277.

**1,2-diphenyl-1a,2,3,7b-tetrahydro-1H-1,3-epoxycyclopropa[a]naphthalene (2a)**

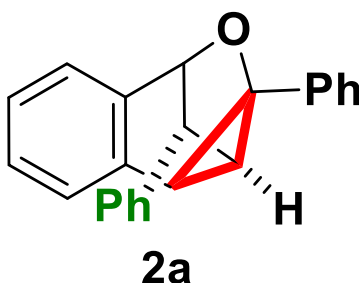

Yield: 91% (56.42 mg), white solid, m.p. 87-89 °C. Purification by flash column chromatography on silica gel (eluent: EtOAc/Petroleum ether = 0.2/9.8).  $^1\text{H NMR}$  (400 MHz,  $\text{CDCl}_3$ )  $\delta$  7.44 (ddd,  $J = 4.1, 3.3, 1.6$  Hz, 2H), 7.41-7.35 (m, 2H), 7.34-7.26 (m, 2H), 7.18 (td,  $J = 7.5, 1.3$  Hz, 1H), 7.08-6.96 (m, 4H), 6.95-6.91 (m, 2H), 6.85-6.81 (m, 1H), 5.31 (d,  $J = 6.1$  Hz, 1H), 3.93 (dd,  $J = 6.1, 2.8$  Hz, 1H), 2.90 (d,  $J = 7.9$  Hz, 1H), 2.57 (ddd,  $J = 7.9, 2.8, 0.6$  Hz, 1H);  $^{13}\text{C NMR}$  (101 MHz,  $\text{CDCl}_3$ )  $\delta$  137.91, 136.50, 133.02, 131.97, 128.36, 127.88, 127.80, 127.68, 126.93, 126.37, 125.88, 125.04, 124.93, 124.24, 110.46, 79.01, 65.53, 43.31, 27.67, 25.30; **HRMS (EI):**  $m/z$  calc'd for  $[\text{M}]^+$   $[\text{C}_{23}\text{H}_{18}\text{O}]^+$  310.1358, found, 310.1360.

**2-phenyl-1-(p-tolyl)-1a,2,3,7b-tetrahydro-1H-1,3-epoxycyclopropa[a]naphthalene (2b)**

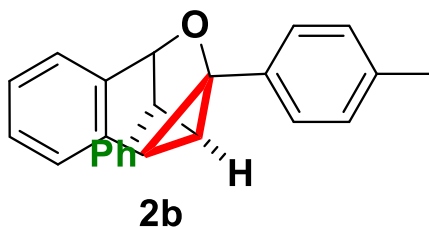

Yield: 93% (60.26 mg), Off-white solid, m.p. 98-100 °C. Purification by flash column chromatography on silica gel (eluent: EtOAc/Petroleum ether = 0.2/9.8).  $^1\text{H NMR}$  (400 MHz,  $\text{CDCl}_3$ )  $\delta$  7.32 (ddd,  $J = 6.0, 3.8, 1.2$  Hz, 3H), 7.21-7.14 (m, 3H), 7.08-6.95 (m, 4H), 6.94-6.90 (m, 2H), 6.84-6.79 (m, 1H), 5.29 (d,  $J = 6.1$  Hz, 1H), 3.92 (dd,  $J = 6.1, 2.7$  Hz, 1H), 2.85 (d,  $J = 7.8$  Hz, 1H), 2.52 (ddd,  $J = 7.8, 2.8, 0.6$  Hz, 1H), 2.36 (s, 3H);  $^{13}\text{C NMR}$  (101 MHz,  $\text{CDCl}_3$ )  $\delta$  136.69, 136.59, 134.72, 133.15, 131.98, 129.04, 127.85, 127.80, 127.63, 126.33, 125.84, 125.05, 124.94, 124.22, 78.99, 65.49, 43.31, 27.32, 25.06, 21.12; **HRMS (EI):**  $m/z$  calc'd for  $[\text{M}]^+ [\text{C}_{24}\text{H}_{20}\text{O}]^+$  324.1514, found, 324.1452.

**1,2-diphenyl-1,2,3,7b-tetrahydro-1aH-1,3-epoxycyclopropa[a]naphthalene-1a-carbonitrile (2c)**

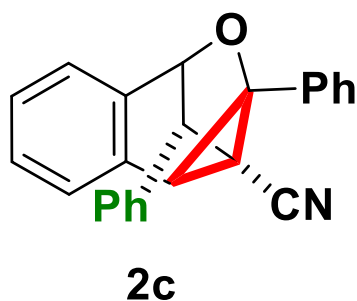

Yield: 87% (58.29 mg), light-brown solid, m.p.= 150-152 °C; Purification by flash column chromatography on silica gel (eluent: EtOAc/Petroleum ether = 0.6/9.4).  $^1\text{H NMR}$  (400 MHz,  $\text{CDCl}_3$ )  $\delta$  7.70-7.63 (m, 2H), 7.51-7.38 (m, 4H), 7.29 (td,  $J = 7.6, 1.2$  Hz, 1H), 7.13-7.06 (m, 4H), 6.92-6.81 (m, 3H), 5.42-5.35 (m, 1H), 4.23 (dd,  $J = 6.1, 0.6$  Hz, 1H), 3.59 (s, 1H);  $^{13}\text{C NMR}$  (101 MHz,  $\text{CDCl}_3$ )  $\delta$  132.62, 132.26, 131.51, 129.36, 128.94, 128.72, 128.66, 128.37, 127.45, 127.34, 127.00, 126.46, 126.35, 124.70, 118.50, 79.12, 69.46, 46.92, 31.03, 24.01; **HRMS (EI):**  $m/z$  calc'd for  $[\text{M}]^+ [\text{C}_{24}\text{H}_{17}\text{NO}]^+$  335.1310; found, 335.1307.

**1,2-diphenyl-1,2,3,8b-tetrahydro-1aH-1,3-epoxycyclopropa[5,6]naphtho[2,3-d][1,3]dioxole-1a-carbonitrile (2d)**

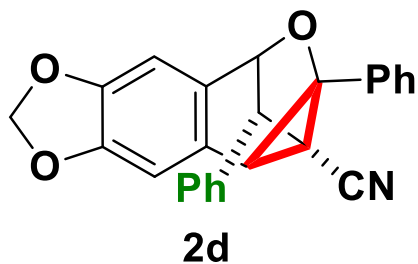

Yield: 91% (68.9 mg), light-brown solid, m.p.= 195-197 °C. Purification by flash column chromatography on silica gel (eluent: EtOAc/Petroleum ether = 1/9).  $^1\text{H NMR}$  (400 MHz,  $\text{CDCl}_3$ )  $\delta$  7.69-7.59 (m, 2H), 7.45 (dt,  $J = 15.8, 7.1$  Hz, 3H), 7.20-7.08 (m, 3H), 6.97-6.87 (m, 3H), 6.36 (s, 1H), 5.88 (q,  $J = 1.5$  Hz, 2H), 5.27 (d,  $J = 6.1$



Hz, 1H), 4.16 (d,  $J = 5.7$  Hz, 1H), 3.49 (s, 1H);  $^{13}\text{C}$  NMR (101 MHz,  $\text{CDCl}_3$ )  $\delta$  147.71, 146.78, 132.67, 132.26, 128.90, 128.71, 128.50, 127.51, 127.39, 126.29, 125.32, 122.79, 118.55, 107.15, 106.14, 101.04, 78.84, 68.83, 46.89, 31.22, 23.67; **HRMS (EI)**:  $m/z$  calc'd for  $[\text{M}]^+$   $[\text{C}_{25}\text{H}_{17}\text{NO}_3]^+$  379.1208, found, 379.1206.

**5-methoxy-1,2-diphenyl-1,2,3,7b-tetrahydro-1aH-1,3-epoxycyclopropa[a]naphthalene-1a-carbonitrile (2e)**

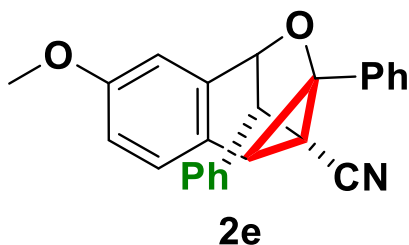

Yield: 85% (62.5 mg), Off-white-brown solid, m.p.= 154-156 °C. Purification by flash column chromatography on silica gel (eluent: EtOAc/Petroleum ether = 0.6/9.4).  $^1\text{H}$  NMR (400 MHz,  $\text{CDCl}_3$ )  $\delta$  7.69-7.63 (m, 2H), 7.50-7.39 (m, 3H), 7.14-7.07 (m, 3H), 7.01 (d,  $J = 2.4$  Hz, 1H), 6.92-6.86 (m, 2H), 6.76 (d,  $J = 8.2$  Hz, 1H), 6.62 (dd,  $J = 8.2, 2.5$  Hz, 1H), 5.33 (d,  $J = 6.0$  Hz, 1H), 4.19 (d,  $J = 6.0$  Hz, 1H), 3.78 (s, 3H), 3.53 (s, 1H);  $^{13}\text{C}$  NMR (101 MHz,  $\text{CDCl}_3$ )  $\delta$  159.85, 132.86, 132.33, 130.64, 128.90, 128.70, 128.40, 127.48, 127.29, 126.33, 125.87, 124.05, 118.53, 112.33, 112.09, 78.73, 69.25, 55.31, 47.29, 31.33, 24.20; **HRMS (EI)**:  $m/z$  calc'd for  $[\text{M}]^+$   $[\text{C}_{25}\text{H}_{19}\text{NO}_2]^+$  365.1416, found, 365.1415.

**6-fluoro-1,2-diphenyl-1,2,3,7b-tetrahydro-1aH-1,3-epoxycyclopropa[a]naphthalene-1a-carbonitrile (2f)**

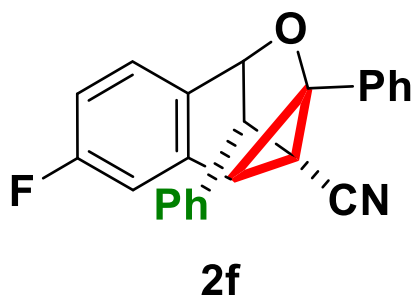

Yield: 88% (62.13 mg), brown solid, m.p.= 187-189 °C. Purification by flash column chromatography on silica gel (eluent: EtOAc/Petroleum ether = 0.5/9.5).  $^1\text{H}$  NMR (400 MHz,  $\text{CDCl}_3$ )  $\delta$  7.71-7.61 (m, 2H), 7.51 – 7.41 (m, 3H), 7.25-7.06 (m, 4H), 6.95-6.74 (m, 4H), 5.38 (d,  $J = 6.1$  Hz, 1H), 4.24 (d,  $J = 6.1$  Hz, 1H), 3.57 (d,  $J = 12.4$  Hz, 1H);  $^{13}\text{C}$  NMR (101 MHz,  $\text{CDCl}_3$ )  $\delta$  163.85, 161.39 (d,  $J_F = 246$  Hz), 132.39, 131.85, 131.45, 131.36 (d,  $J_F = 9$  Hz), 129.12, 129.06, 128.79, 128.54, 127.59, 127.49, 127.36, 127.33, 126.46, 126.38, 126.32, 118.10, 115.81,

115.52 (d,  $J_F = 29$  Hz), 114.07, 113.85, 113.62 (t,  $J_F = 23$  Hz), 112.54, 112.25(d,  $J_F = 29$  Hz), 78.53, 69.35, 46.94, 46.70, 30.91, 30.88, 30.37, 24.09; **HRMS (EI)**:  $m/z$  calc'd for  $[M]^+$   $[C_{24}H_{16}FNO]^+$  353.1216, found, 353.1215.

**6-chloro-1,2-diphenyl-1,2,3,7b-tetrahydro-1aH-1,3-epoxycyclopropa[a]naphthalene-1a-carbonitrile (2g)**

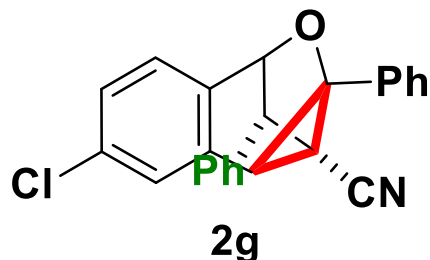

Yield: 79% (58.3 mg), brown solid, m.p. = 124-126 °C; Purification by flash column chromatography on silica gel (eluent: EtOAc/Petroleum ether = 0.5/9.5).  **$^1H$  NMR** (400 MHz,  $CDCl_3$ )  $\delta$  7.68-7.61 (m, 2H), 7.52-7.38 (m, 4H), 7.30-7.26 (m, 1H), 7.13 (dd,  $J = 5.1, 1.9$  Hz, 3H), 6.94-6.76 (m, 3H), 5.35 (d,  $J = 5.9$  Hz, 1H), 4.23 (d,  $J = 6.1$  Hz, 1H), 3.55 (d,  $J = 10.9$  Hz, 1H);  **$^{13}C$  NMR** (150 MHz,  $CDCl_3$ )  $\delta$  133.05, 133.02, 132.08, 131.85, 129.17, 129.11, 128.81, 128.80, 128.63, 127.94, 127.73, 127.67, 127.56, 127.37, 127.34, 127.18, 126.59, 126.44, 126.35, 126.01, 125.05, 118.06, 78.51, 69.52, 46.80, 46.70, 30.60, 30.50, 24.04; **HRMS (EI)**:  $m/z$  calc'd for  $[M]^+$   $[C_{24}H_{16}ClNO]^+$  369.0920, found, 369.0921.

**1-(3-methoxyphenyl)-2-phenyl-1,2,3,7b-tetrahydro-1aH-1,3-epoxycyclopropa[a]naphthalene-1a-carbonitrile (2h)**

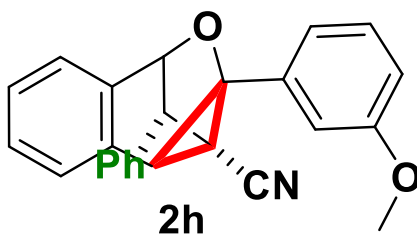

Yield: 90% (65.7 mg), white solid, m.p. = 158-160 °C; Purification by flash column chromatography on silica gel (eluent: EtOAc/Petroleum ether = 0.6/9.4).  **$^1H$  NMR** (400 MHz,  $CDCl_3$ )  $\delta$  7.47 (d,  $J = 7.6$  Hz, 1H), 7.39 (t,  $J = 8.2$  Hz, 1H), 7.29 (td,  $J = 7.6, 1.2$  Hz, 1H), 7.25-7.19 (m, 2H), 7.10 (ddd,  $J = 7.1, 6.3, 1.5$  Hz, 4H), 6.95 (ddd,  $J = 8.3, 2.4, 1.1$  Hz, 1H), 6.91-6.81 (m, 3H), 5.38 (d,  $J = 6.1$  Hz, 1H), 4.22 (d,  $J = 5.7$  Hz, 1H), 3.86 (s, 3H), 3.57 (s, 1H);  **$^{13}C$  NMR** (101 MHz,  $CDCl_3$ )  $\delta$  159.84, 133.81, 132.59, 131.49, 129.80, 129.34, 128.68, 128.38, 127.45, 127.35, 127.02, 126.48, 124.71, 118.45, 118.28, 114.74, 111.95, 110.46, 79.12, 69.37, 55.36, 46.89, 31.24, 24.17; **HRMS (EI)**:  $m/z$  calc'd for  $[M]^+$   $[C_{25}H_{19}NO_2]^+$  365.1416, found, 365.1412.

**2-phenyl-1-(p-tolyl)-1,2,3,7b-tetrahydro-1aH-1,3-epoxycyclopropa[a]naphthalene-1a-carbonitrile (2i)**

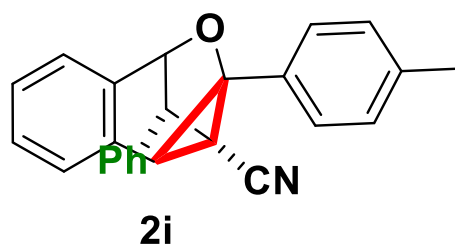

Yield: 89% (62.12 mg), brown solid, m.p. = 146-148 °C; Purification by flash column chromatography on silica gel (eluent: EtOAc/Petroleum ether = 0.4/9.6).  $^1\text{H NMR}$  (400 MHz,  $\text{CDCl}_3$ )  $\delta$  7.59-7.51 (m, 2H), 7.47 (d,  $J = 7.5$  Hz, 1H), 7.32-7.26 (m, 3H), 7.13-7.04 (m, 4H), 6.92-6.85 (m, 2H), 6.83 (d,  $J = 7.4$  Hz, 1H), 5.36 (d,  $J = 6.1$  Hz, 1H), 4.22 (d,  $J = 6.1$  Hz, 1H), 3.56 (s, 1H), 2.39 (s, 3H);  $^{13}\text{C NMR}$  (101 MHz,  $\text{CDCl}_3$ )  $\delta$  138.95, 132.74, 131.56, 129.47, 129.43, 129.12, 128.62, 128.35, 127.45, 127.30, 126.93, 126.50, 126.43, 124.69, 118.68, 79.12, 69.56, 46.91, 30.81, 23.80, 21.26; **HRMS (EI):** (m/z) calc'd for  $[\text{M}]^+$   $[\text{C}_{25}\text{H}_{19}\text{NO}]^+$  349.1467, found, 349.1465.

**1-(4-fluorophenyl)-2-phenyl-1,2,3,7b-tetrahydro-1aH-1,3-epoxycyclopropa[a]naphthalene-1a-carbonitrile (2j)**

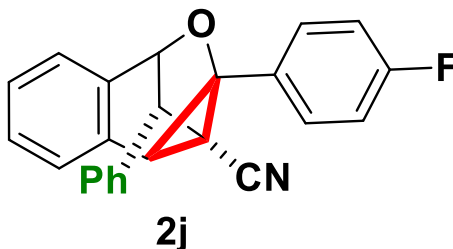

Yield: 83%, (58.6 mg), light-brown solid, m.p.= 141-142 °C. Purification by flash column chromatography on silica gel (eluent: EtOAc/Petroleum ether = 0.4/9.6).  $^1\text{H NMR}$  (400 MHz,  $\text{CDCl}_3$ )  $\delta$  7.68-7.61 (m, 2H), 7.50-7.45 (m, 1H), 7.30 (td,  $J = 7.6, 1.2$  Hz, 1H), 7.21-7.06 (m, 6H), 6.91-6.81 (m, 3H), 5.37 (dd,  $J = 6.1, 0.4$  Hz, 1H), 4.23 (dd,  $J = 6.1, 0.7$  Hz, 1H), 3.55 (s, 1H);  $^{13}\text{C NMR}$  (101 MHz,  $\text{CDCl}_3$ )  $\delta$  164.32, 161.85 (d,  $J_F = 247$  Hz), 132.48, 131.42 (d,  $J_F = 106$  Hz), 129.16, 128.73, 128.63, 128.54, 128.41 (t,  $J_F = 9$  Hz), 128.08 (d,  $J_F = 3$  Hz), 127.41, 127.11 (d,  $J_F = 30$  Hz), 126.47, 124.74, 118.45, 115.95, 115.73 (d,  $J_F = 22$  Hz),, 79.19, 69.11, 46.86, 30.83, 23.82; **HRMS (EI):** m/z calc'd for  $[\text{M}]^+$   $[\text{C}_{24}\text{H}_{16}\text{FNO}]^+$  353.1216, found, 353.1218.

**1-(4-chlorophenyl)-2-phenyl-1,2,3,7b-tetrahydro-1aH-1,3-epoxycyclopropa[a]naphthalene-1a-carbonitrile (2k)**

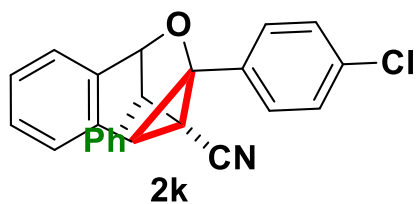

Yield: 78% (57.56 mg), Off-white solid, m.p.= 212-214 °C. Purification by flash column chromatography on silica gel (eluent: EtOAc/Petroleum ether = 0.4/9.6). **<sup>1</sup>H NMR** (400 MHz, CDCl<sub>3</sub>) δ 7.65-7.57 (m, 2H), 7.52-7.42 (m, 3H), 7.32-7.27 (m, 1H), 7.14-7.07 (m, 4H), 6.90-6.82 (m, 3H), 5.38 (d, *J* = 6.1 Hz, 1H), 4.21 (d, *J* = 5.6 Hz, 1H), 3.56 (s, 1H); **<sup>13</sup>C NMR** (101 MHz, CDCl<sub>3</sub>) δ 134.95, 132.39, 131.39, 130.93, 129.43, 129.06, 128.97, 128.77, 128.42, 127.67, 127.43, 127.41, 127.17, 126.49, 124.75, 118.27, 79.19, 68.98, 46.85, 31.04, 24.15; **HRMS (EI):** m/z calc'd for [M]<sup>+</sup> [C<sub>24</sub>H<sub>16</sub>ClNO]<sup>+</sup> 369.0920; found, 369.0922.

**1-(furan-2-yl)-2-phenyl-1,2,3,7b-tetrahydro-1aH-1,3-epoxycyclopropa[a]naphthalene-1a-carbonitrile (2l)**

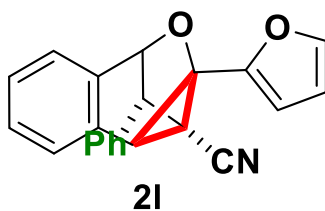

Yield: 77%, (50.1 mg), White solid, m.p. = 105-107 °C. Purification by flash column chromatography on silica gel (eluent: EtOAc/Petroleum ether = 0.4/9.6). **<sup>1</sup>H NMR** (400 MHz, CDCl<sub>3</sub>) δ 7.57-7.54 (m, 1H), 7.52 (d, *J* = 7.2 Hz, 1H), 7.47-7.39 (m, 5H), 7.36 (ddd, *J* = 7.5, 5.0, 1.4 Hz, 2H), 7.24 (d, *J* = 7.2 Hz, 1H), 6.80-6.70 (m, 1H), 6.49 (dd, *J* = 3.3, 1.9 Hz, 1H), 5.15 (s, 1H), 3.65 (s, 1H), 2.94 (s, 1H); **<sup>13</sup>C NMR** (101 MHz, CDCl<sub>3</sub>) δ 145.50, 144.01, 136.82, 135.69, 129.14, 129.07, 128.18, 127.82, 127.71, 127.52, 127.32, 122.74, 117.83, 110.94, 110.73, 82.44, 64.99, 48.64, 32.43, 24.63; **HRMS (EI):** m/z calc'd for [M]<sup>+</sup> [C<sub>22</sub>H<sub>15</sub>NO<sub>2</sub>]<sup>+</sup> 325.1103, found, 325.1105.

**2-phenyl-1-(thiophen-2-yl)-1,2,3,7b-tetrahydro-1aH-1,3-epoxycyclopropa[a]naphthalene-1a-carbonitrile (2m)**

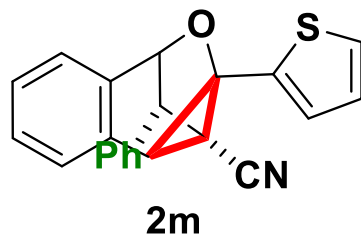

Yield: 83% (56.61 mg), Light-brown solid, m.p.= 144-146 °C; Purification by flash column chromatography on silica gel (eluent: EtOAc/Petroleum ether = 0.4/9.8). **<sup>1</sup>H NMR** (400 MHz, CDCl<sub>3</sub>) δ 7.53-7.45 (m, 2H), 7.44-7.37 (m, 7H), 7.37-7.26 (m, 5H), 7.13-7.06 (m, 6H), 6.90-6.79 (m, 3H), 5.36 (d, *J* = 6.1 Hz, 1H), 5.21 (s, 1H), 4.25 (d, *J* = 6.1 Hz, 1H), 3.57 (d, *J* = 4.8 Hz, 2H), 2.97 (s, 1H); **<sup>13</sup>C NMR** (101 MHz, CDCl<sub>3</sub>) δ 136.81, 135.63, 134.94, 134.53, 132.41, 131.31, 129.14, 129.05, 128.90, 128.76, 128.40, 128.17, 127.84, 127.44, 127.40, 127.34, 127.30, 127.20, 127.17, 126.86, 126.78, 126.52, 125.86, 125.83, 124.82, 122.74, 118.28, 117.85, 82.52, 79.42, 67.38, 67.03, 48.85, 46.56, 34.73, 32.05, 26.95, 24.84; **HRMS (EI)**: m/z calc'd for [M]<sup>+</sup> [C<sub>22</sub>H<sub>15</sub>NOS]<sup>+</sup> 341.0874, found, 341.0872.

**1-(tert-butyl)-2-phenyl-1,2,3,7b-tetrahydro-1aH-1,3-epoxycyclopropa[a]naphthalene-1a-carbonitrile (2n)**

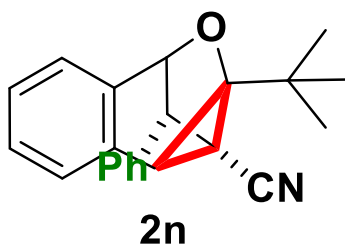

Yield: 65% (40.95 mg), White solid, m.p.= 90-92 °C. Purification by flash column chromatography on silica gel (eluent: EtOAc/Petroleum ether = 0.2/9.8). **<sup>1</sup>H NMR** (400 MHz, CDCl<sub>3</sub>) δ 7.44-7.37 (m, 1H), 7.27-7.23 (m, 1H), 7.09-7.00 (m, 4H), 6.82-6.71 (m, 3H), 5.15 (dd, *J* = 6.2, 0.5 Hz, 1H), 4.00 (dd, *J* = 6.2, 0.6 Hz, 1H), 3.25 (s, 1H), 1.26 (s, 9H); **<sup>13</sup>C NMR** (101 MHz, CDCl<sub>3</sub>) δ 132.86, 131.83, 130.36, 128.34, 128.22, 127.43, 127.15, 126.55, 126.08, 124.50, 119.75, 78.23, 75.07, 47.49, 32.34, 27.61, 26.74, 18.88; **HRMS (EI)**: m/z calc'd for [M]<sup>+</sup> [C<sub>21</sub>H<sub>22</sub>NO]<sup>+</sup> 315.1623, found, 315.1623.

**1-phenyl-1,2,3,7b-tetrahydro-1aH-1,3-epoxycyclopropa[a]naphthalene-1a-carbonitrile (2o)**

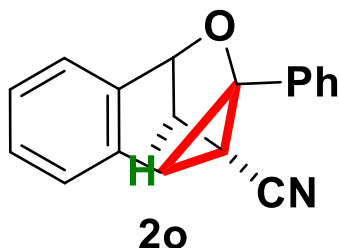

Yield: 76% (39.37 mg), brown solid, m.p.= 88-90 °C; Purification by flash column chromatography on silica gel (eluent: EtOAc/Petroleum ether = 0.2/9.8). **<sup>1</sup>H NMR** (400 MHz, CDCl<sub>3</sub>) δ 7.63-7.56 (m, 2H), 7.48-7.36 (m, 5H), 7.33 (td, *J* = 7.4, 1.5 Hz, 1H), 7.25-7.21 (m, 1H), 5.34 (d, *J* = 6.1 Hz, 1H), 3.41 (s, 1H), 2.64 (ddd, *J* = 11.8, 6.0, 0.8 Hz, 1H), 1.73 (d, *J* = 11.8 Hz, 1H); **<sup>13</sup>C NMR** (101 MHz, CDCl<sub>3</sub>) δ 134.98, 132.22, 128.77, 128.73, 128.65, 128.16, 127.25, 127.00, 126.29, 122.57, 118.95, 75.09, 68.87, 31.70, 31.06, 19.26; **HRMS (EI)**: *m/z* calc'd for [M]<sup>+</sup> [C<sub>18</sub>H<sub>13</sub>NO] 259.0997, found, 259.0998.

**6-fluoro-1-phenyl-1,2,3,7b-tetrahydro-1aH-1,3-epoxycyclopropa[a]naphthalene-1a-carbonitrile (2p)**

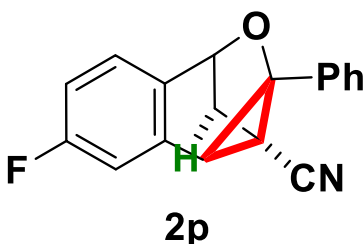

Yield: 71% (39.33 mg), brown solid, m.p.= 114-146 °C. Purification by flash column chromatography on silica gel (eluent: EtOAc/Petroleum ether = 0.4/9.6). **<sup>1</sup>H NMR** (400 MHz, CDCl<sub>3</sub>) δ 7.62-7.55 (m, 2H), 7.44 (dddd, *J* = 8.6, 7.0, 4.6, 2.3 Hz, 3H), 7.19 (ddd, *J* = 11.1, 8.4, 3.9 Hz, 2H), 7.01 (ddd, *J* = 9.1, 8.3, 2.5 Hz, 1H), 5.34 (d, *J* = 6.0 Hz, 1H), 3.38 (s, 1H), 2.65 (ddd, *J* = 11.8, 6.0, 0.7 Hz, 1H), 1.72 (d, *J* = 11.8 Hz, 1H); **<sup>13</sup>C NMR** (101 MHz, CDCl<sub>3</sub>) δ 164.01, 161.56 (d, *J<sub>F</sub>* = 245 Hz), 131.80, 130.89 (d, *J<sub>F</sub>* = 3 Hz), 130.32, 130.24 (d, *J<sub>F</sub>* = 8 Hz), 128.95, 128.73, 126.33, 124.38, 124.30 (d, *J<sub>F</sub>* = 8 Hz), 118.56, 114.58, 114.35 (d, *J<sub>F</sub>* = 22 Hz), 113.96, 113.75 (d, *J<sub>F</sub>* = 21 Hz), 74.48, 68.75, 31.84, 30.97, 30.95, 19.42; **HRMS (EI)**: *m/z* calc'd for [M]<sup>+</sup> [C<sub>18</sub>H<sub>12</sub>FNO]<sup>+</sup> 277.0903, found, 277.0901.

**1,9-diphenyl-1,1a,8,9-tetrahydro-9aH-1,8-epoxycyclopropa[a]phenanthrene-9a-carbonitrile (2q)**

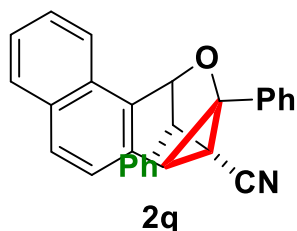

Yield: 72% (55.44 mg), Light-brown solid, m.p.= 110-112 °C. Purification by flash column chromatography on silica gel (eluent: EtOAc/Petroleum ether = 0.3/9.7). **<sup>1</sup>H NMR** (597 MHz, CDCl<sub>3</sub>) δ 8.04 (d, *J* = 7.8 Hz, 1H), 7.96-7.90 (m, 2H), 7.75-7.70 (m, 2H), 7.61-7.56 (m, 2H), 7.54-7.47 (m, 3H), 7.46-7.34 (m, 6H), 6.06 (s, 1H), 3.72 (s, 1H), 2.99 (s, 1H); **<sup>13</sup>C NMR** (150 MHz, CDCl<sub>3</sub>) δ 137.18, 132.54, 132.01, 131.56, 129.21, 128.93, 128.86, 128.82, 128.12, 127.88, 127.24, 127.07, 126.05, 126.01, 125.81, 125.15, 121.46, 118.17, 77.77, 69.50, 48.75, 34.51, 26.42; **HRMS (EI)**: *m/z* calc'd for [M]<sup>+</sup> [C<sub>28</sub>H<sub>19</sub>NO]<sup>+</sup> 385.1467, found, 385.1465.

**2-(4-methoxyphenyl)-1-phenyl-1,2,3,7b-tetrahydro-1aH-1,3-epoxycyclopropa[a]naphthalene-1a-carbonitrile (2r)**

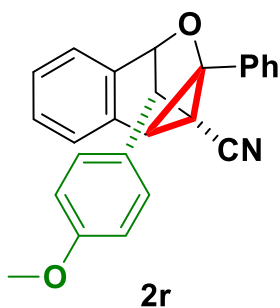

Yield: 91% (66.43 mg), Off-white solid, m.p.= 158-160 °C. Purification by flash column chromatography on silica gel (eluent: EtOAc/Petroleum ether = 0.6/9.4). **<sup>1</sup>H NMR** (400 MHz, CDCl<sub>3</sub>) δ 7.71-7.61 (m, 2H), 7.53-7.37 (m, 4H), 7.31 (td, *J* = 7.6, 1.2 Hz, 1H), 7.13 (td, *J* = 7.5, 1.0 Hz, 1H), 6.87 (d, *J* = 7.4 Hz, 1H), 6.77 (d, *J* = 8.6 Hz, 2H), 6.66-6.59 (m, 2H), 5.33 (d, *J* = 6.1 Hz, 1H), 4.16 (d, *J* = 6.1 Hz, 1H), 3.68 (s, 3H), 3.56 (s, 1H); **<sup>13</sup>C NMR** (101 MHz, CDCl<sub>3</sub>) δ 158.69, 132.34, 131.65, 129.47, 128.89, 128.71, 128.62, 128.59, 127.05, 126.42, 126.33, 124.84, 124.47, 118.56, 113.82, 79.09, 69.33, 55.08, 46.27, 31.00, 24.41; **HRMS (EI)**: *m/z* calc'd for [M]<sup>+</sup> [C<sub>25</sub>H<sub>19</sub>NO<sub>2</sub>]<sup>+</sup> 365.1416, found, 365.1414.

**1-phenyl-2-(p-tolyl)-1,2,3,7b-tetrahydro-1aH-1,3-epoxycyclopropa[a]naphthalene-1a-carbonitrile (2s)**

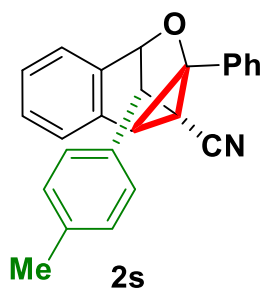

Yield: 87% (60.73), White solid, m.p. = 154-156 °C. Purification by flash column chromatography on silica gel (eluent: EtOAc/Petroleum ether = 0.4/9.6). **<sup>1</sup>H NMR** (400 MHz, CDCl<sub>3</sub>) δ 7.69-7.62 (m, 2H), 7.51-7.44 (m, 3H), 7.42 (dd, *J* = 4.9, 3.6 Hz, 1H), 7.30 (td, *J* = 7.6, 1.2 Hz, 1H), 7.12 (td, *J* = 7.5, 1.1 Hz, 1H), 6.88 (dd, *J* = 12.4, 7.7 Hz, 3H), 6.75 (d, *J* = 8.1 Hz, 2H), 5.35 (d, *J* = 6.1 Hz, 1H), 4.18 (d, *J* = 6.1 Hz, 1H), 3.56 (s, 1H), 2.19 (s, 3H); **<sup>13</sup>C NMR** (101 MHz, CDCl<sub>3</sub>) δ 136.98, 132.35, 131.63, 129.47, 129.44, 129.08, 128.89, 128.70, 128.61, 127.36, 126.98, 126.43, 126.34, 124.79, 118.55, 79.09, 69.33, 46.63, 31.01, 24.23, 20.96; **HRMS (EI)**: *m/z* calc'd for [M]<sup>+</sup> [C<sub>24</sub>H<sub>20</sub>O]<sup>+</sup> 324.1514, found, 324.1516.

**2-(4-chlorophenyl)-1-phenyl-1,2,3,7b-tetrahydro-1aH-1,3-epoxycyclopropa[a]naphthalene-1a-carbonitrile (2t)**

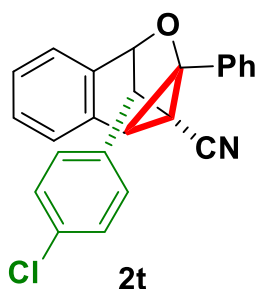

Yield: 76% (58.6 mg), Off-white solid, m.p.= 175-177 °C. Purification by flash column chromatography on silica gel (eluent: EtOAc/Petroleum ether = 0.5/9.5). **<sup>1</sup>H NMR** (400 MHz, CDCl<sub>3</sub>) δ 7.70-7.62 (m, 2H), 7.54-7.38 (m, 4H), 7.32 (td, *J* = 7.6, 1.2 Hz, 1H), 7.14 (td, *J* = 7.5, 1.1 Hz, 1H), 7.10-7.02 (m, 2H), 6.83 (dd, *J* = 18.4, 7.9 Hz, 3H), 5.36 (d, *J* = 6.1 Hz, 1H), 4.18 (d, *J* = 6.1 Hz, 1H), 3.58 (s, 1H); **<sup>13</sup>C NMR** (101 MHz, CDCl<sub>3</sub>) δ 133.29, 132.02, 131.26, 131.20, 129.20, 129.04, 128.89, 128.81, 128.76, 128.63, 127.24, 126.52, 126.35, 124.78, 118.23, 78.90, 69.53, 46.42, 30.98, 24.02; **HRMS (EI)**: *m/z* calc'd for [M]<sup>+</sup> [C<sub>24</sub>H<sub>16</sub>ClNO]<sup>+</sup> 369.0920, found, 369.0921.

**2-(4-bromophenyl)-1-phenyl-1,2,3,7b-tetrahydro-1aH-1,3-epoxycyclopropa[a]naphthalene-1a-carbonitrile (2u)**

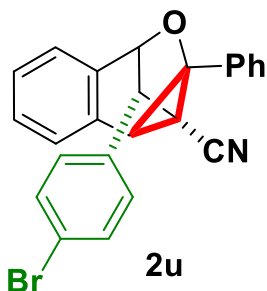

Yield: 79% (56.1), Off-white solid, m.p.= 116-118 °C. Purification by flash column chromatography on silica gel (eluent: EtOAc/Petroleum ether = 0.4/9.6). **<sup>1</sup>H NMR** (400 MHz, CDCl<sub>3</sub>) δ 7.69-7.61 (m, 2H), 7.53-7.39 (m, 4H),



7.32 (d,  $J = 1.2$  Hz, 1H), 7.25-7.19 (m, 2H), 7.18-7.11 (m, 1H), 6.86 (d,  $J = 7.4$  Hz, 1H), 6.78-6.72 (m, 2H), 5.36 (d,  $J = 6.1$  Hz, 1H), 4.17 (d,  $J = 6.1$  Hz, 1H), 3.58 (s, 1H);  $^{13}\text{C NMR}$  (101 MHz,  $\text{CDCl}_3$ )  $\delta$  132.00, 131.79, 131.58, 131.17, 129.15, 129.05, 128.91, 128.76, 127.27, 126.51, 126.35, 124.79, 121.43, 118.21, 109.89, 78.83, 69.29, 46.49, 30.98, 23.98; **HRMS (EI)**:  $m/z$  calc'd for  $[\text{M}]^+$   $[\text{C}_{24}\text{H}_{16}\text{ClNO}]^+$  413.0415, found, 413.0415.

**2-(naphthalen-2-yl)-1-phenyl-1,2,3,7b-tetrahydro-1aH-1,3-epoxycyclopropa[a]naphthalene-1a-carbonitrile (2v)**

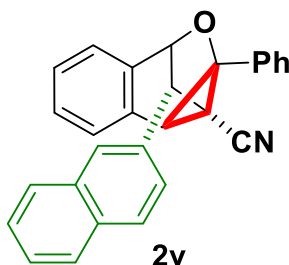

Yield: 88% (67.76), Off-white solid, m.p.= 110-112 °C. Purification by flash column chromatography on silica gel (eluent: EtOAc/Petroleum ether = 0.3/9.7).  $^1\text{H NMR}$  (400 MHz,  $\text{CDCl}_3$ )  $\delta$  7.69 (ddd,  $J = 7.4, 4.8, 3.2$  Hz, 3H), 7.65-7.57 (m, 2H), 7.49 (ddd,  $J = 8.2, 3.5, 1.9$  Hz, 3H), 7.46-7.33 (m, 4H), 7.28-7.24 (m, 1H), 7.06-6.95 (m, 2H), 6.81 (d,  $J = 7.4$  Hz, 1H), 5.48 (d,  $J = 6.1$  Hz, 1H), 4.38 (d,  $J = 6.1$  Hz, 1H), 3.67 (s, 1H);  $^{13}\text{C NMR}$  (101 MHz,  $\text{CDCl}_3$ )  $\delta$  133.07, 132.44, 132.26, 131.46, 130.21, 129.39, 128.98, 128.75, 128.73, 128.14, 127.66, 127.46, 127.10, 126.62, 126.45, 126.39, 126.12, 125.92, 125.24, 124.74, 118.54, 79.13, 69.55, 47.12, 31.14, 24.18; **HRMS (EI)**:  $m/z$  calc'd for  $[\text{M}]^+$   $[\text{C}_{28}\text{H}_{19}\text{NO}]^+$  385.1467, found, 385.1465.

**1a-methyl-1,2-diphenyl-1a,2,3,7b-tetrahydro-1H-1,3-epoxycyclopropa[a]naphthalene (2w)**

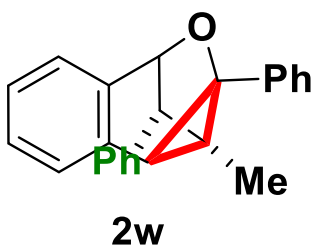

Yield: 80% (51.84), White solid, m.p.= 111-113 °C. Purification by flash column chromatography on silica gel (eluent: EtOAc/Petroleum ether = 0.2/9.8).  $^1\text{H NMR}$  (400 MHz,  $\text{CDCl}_3$ )  $\delta$  7.58 (dd,  $J = 8.3, 1.3$  Hz, 2H), 7.41 (ddd,  $J = 6.2, 3.9, 3.4$  Hz, 3H), 7.33 (d,  $J = 7.4$  Hz, 1H), 7.22 (d,  $J = 1.3$  Hz, 1H), 7.08-7.02 (m, 3H), 6.98 (d,  $J = 1.2$  Hz, 1H), 6.80 (dd,  $J = 7.4, 2.3$  Hz, 3H), 5.19 (d,  $J = 6.1$  Hz, 1H), 3.65 (d,  $J = 6.1$  Hz, 1H), 2.80 (s, 1H), 1.25 (s, 3H);  $^{13}\text{C NMR}$  (101 MHz,  $\text{CDCl}_3$ )  $\delta$  135.65, 135.22, 134.37, 131.76, 128.41, 128.24, 127.90, 127.68, 127.64,

126.40, 125.63, 124.94, 124.35, 79.30, 69.06, 49.23, 29.69, 29.29, 13.78; **HRMS (EI)**:  $m/z$  calc'd for  $[M]^+$   $[C_{24}H_{20}O]^+$  324.1514, found, 324.1515.

**2-cyclopropyl-1-phenyl-1,2,3,7b-tetrahydro-1aH-1,3-epoxycyclopropa[a]naphthalene-1a-carbonitrile (2x)**

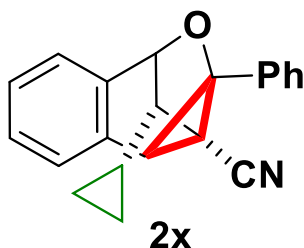

Yield: 82% (49 mg), White solid, m.p.= 150-152 °C. Purification by flash column chromatography on silica gel (eluent: EtOAc/Petroleum ether = 0.2/9.8). **<sup>1</sup>H NMR** (400 MHz,  $CDCl_3$ )  $\delta$  7.56 (d,  $J$  = 7.2 Hz, 2H), 7.47-7.33 (m, 6H), 7.28 (d,  $J$  = 7.0 Hz, 1H), 5.16 (d,  $J$  = 5.9 Hz, 1H), 3.37 (s, 1H), 2.09 (dd,  $J$  = 10.1, 5.9 Hz, 1H), 0.51-0.43 (m, 2H), 0.35-0.28 (m, 1H), 0.15 (ddd,  $J$  = 11.3, 9.3, 4.9 Hz, 1H), 0.29 (tdd,  $J$  = 7.8, 6.6, 4.0 Hz, 1H); **<sup>13</sup>C NMR** (101 MHz,  $CDCl_3$ )  $\delta$  132.84, 132.48, 129.26, 128.66, 128.59, 126.90, 126.88, 126.13, 124.39, 118.88, 77.80, 69.59, 47.87, 30.72, 24.09, 6.58, 3.63, 2.34; **HRMS (EI)**:  $m/z$  calc'd for  $[M]^+$   $[C_{21}H_{17}NO]^+$  299.1310, found, 299.1310.

**3-(2-phenyl-1a,2,3,7b-tetrahydro-1H-1,3-epoxycyclopropa[a]naphthalen-1-yl)pyridine (2y)**

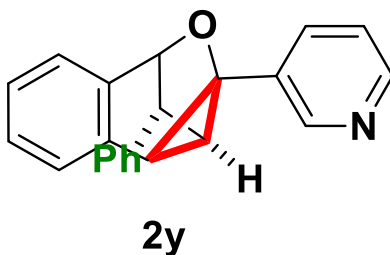

Yield: 88% (53.49 mg), White solid, m.p.= 138-140 °C. Purification by flash column chromatography on silica gel (eluent: EtOAc/Petroleum ether = 1.2/8.8). **<sup>1</sup>H NMR** (400 MHz,  $CDCl_3$ )  $\delta$  8.67 (s, 1H), 8.53 (d,  $J$  = 3.6 Hz, 1H), 7.83 – 7.69 (m, 1H), 7.37-7.17 (m, 3H), 7.11-6.97 (m, 4H), 6.96-6.89 (m, 2H), 6.84 (d,  $J$  = 7.3 Hz, 1H), 5.32 (d,  $J$  = 6.1 Hz, 1H), 3.94 (dd,  $J$  = 6.0, 2.7 Hz, 1H), 2.93 (d,  $J$  = 7.9 Hz, 1H), 2.61 (dd,  $J$  = 7.9, 2.7 Hz, 1H); **<sup>13</sup>C NMR** (101 MHz,  $CDCl_3$ )  $\delta$  148.13, 146.41, 135.98, 133.90, 132.74, 132.36, 131.80, 127.92, 127.85, 127.72, 126.49, 125.94, 125.34, 124.28, 123.08, 78.91, 63.70, 43.31, 27.40, 25.20; **HRMS (EI)**:  $m/z$  calc'd for  $[M]^+$   $[C_{22}H_{17}NO]^+$  311.1310, found, 311.1312.

**2,4-diphenyl-3a,5a,6,7,8,9-hexahydroindeno[7a,1-b]furan-3-carbonitrile (2ab)**

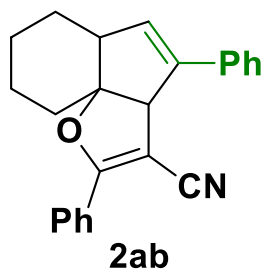

Yield: 94% (63.7 mg), White solid, m.p. = 144-146 °C. Purification by flash column chromatography on silica gel (eluent: EtOAc/Petroleum ether = 0.5/9.5).  $^1\text{H NMR}$  (597 MHz,  $\text{CDCl}_3$ )  $\delta$  8.04-7.92 (m, 2H), 7.50-7.40 (m, 3H), 7.34 (ddd,  $J = 7.8, 4.5, 1.7$  Hz, 2H), 7.27-7.22 (m, 3H), 5.57 (t,  $J = 2.1$  Hz, 1H), 4.10 (dd,  $J = 5.4, 2.3$  Hz, 1H), 3.31 (d,  $J = 2.3$  Hz, 1H), 2.65-2.52 (m, 1H), 2.41-2.30 (m, 1H), 2.24 (d,  $J = 13.8$  Hz, 1H), 2.05-1.90 (m, 2H), 1.82 (dd,  $J = 10.6, 3.2$  Hz, 1H), 1.60 (td,  $J = 13.6, 4.2$  Hz, 1H), 1.53-1.45 (m, 1H);  $^{13}\text{C NMR}$  (150 MHz,  $\text{CDCl}_3$ )  $\delta$  164.48, 143.97, 143.60, 131.15, 128.83, 128.59, 128.55, 127.22, 127.13, 126.84, 126.71, 118.17, 100.96, 84.01, 60.59, 57.53, 38.05, 26.92, 26.34, 22.39; **HRMS (EI)**:  $m/z$  calc'd for  $[\text{M}]^+$   $[\text{C}_{24}\text{H}_{21}\text{NO}]^+$  339.1623, found, 339.1621.

**phenyl(3-phenyl-4-(2,4,6-trimethoxyphenyl)-1,2,3,4-tetrahydronaphthalen-2-yl)methanone (3a)**

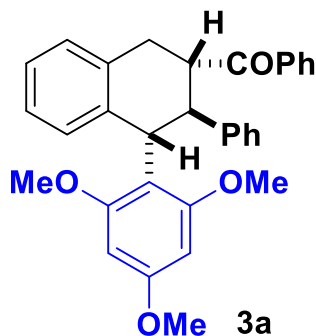

To a 25 mL Schlenk tube with a magnetic bar were added **2a** (1.0 eq, 0.1 mmol), 1,3,5-trimethoxy benzene (1.5 equiv) the corresponding solvent 1,2-DCE (2.0 mL) and TfOH (0.3 equiv) at r.t. The reaction mixture was stirred at room temperature. After the reaction was finished (5h), the reaction mixture was concentrated in vacuo. The crude product was purified by column chromatography (silica gel, EtOAc/petroleum ether = 1:5) to afford **3a** as off-white solid (89%, 42.5 mg), m.p.= 182-184 °C.  $^1\text{H NMR}$  (400 MHz,  $\text{CDCl}_3$ )  $\delta$  7.84 (dt,  $J = 8.5, 1.7$  Hz, 2H), 7.76 (dd,  $J = 8.4, 1.3$  Hz, 1H), 7.66 (dd,  $J = 8.4, 7.1$  Hz, 1H), 7.61 (s, 1H), 7.57-7.50 (m, 2H), 7.48-7.41 (m, 3H), 7.40-7.29 (m, 3H), 7.20 (ddt,  $J = 8.1, 6.2, 1.8$  Hz, 3H), 7.17-7.10 (m, 1H), 7.09-7.03 (m, 2H), 4.75 (d,  $J = 3.5$  Hz, 2H), 4.39 (ddd,  $J = 14.9, 9.3, 5.5$  Hz, 1H), 4.01 (dd,  $J = 8.3, 3.5$  Hz, 1H), 3.39 (ddt,  $J = 21.0, 9.4, 7.0$  Hz, 1H), 3.11 (dq,  $J = 9.2, 7.0$  Hz, 1H), 0.95 (t,  $J = 7.0$  Hz, 3H);  $^{13}\text{C NMR}$  (101 MHz,  $\text{CDCl}_3$ )  $\delta$  202.89, 159.58, 159.11,

143.20, 141.18, 137.36, 134.93, 132.65, 128.37, 128.12, 128.06, 127.63, 127.31, 126.00, 125.64, 124.71, 113.71, 92.09, 90.58, 55.73, 55.07, 47.76, 47.50, 42.21, 35.36; **HRMS (EI)**:  $m/z$  calc'd for  $[M]^+$   $[C_{30}H_{26}N_2O_3]^+$  478.2144, found, 478.2131.

**(4-bromo-1-ethoxy-3-phenyl-1,2,3,4-tetrahydronaphthalen-2-yl)(phenyl)methanone (4a)**

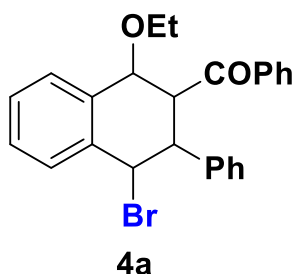

To a 25 mL Schlenk tube with a magnetic bar were added **2a** (1.0 eq, 0.1 mmol), the corresponding solvent ethanol (2.0 mL) and NBS (1.0 equiv) at r.t. The reaction mixture was stirred at room temperature under dark. After the reaction was finished (10h), the reaction mixture was concentrated in vacuo. The crude product was purified by column chromatography (silica gel, EtOAc/petroleum ether = 1:3) to afford **4a** (d.r. = 5:1) as light-purple solid (91%, 39.5 mg), m.p.= 180-182 °C. **<sup>1</sup>H NMR** (400 MHz, CDCl<sub>3</sub>) δ 7.86 – 7.82 (m, 2H), 7.58 – 7.50 (m, 2H), 7.48-7.43 (m, 3H), 7.39-7.35 (m, 1H), 7.34-7.29 (m, 1H), 7.23-7.17 (m, 2H), 7.14 (ddd, J = 7.2, 3.7, 1.4 Hz, 1H), 7.08-7.04 (m, 2H), 4.79-4.71 (m, 2H), 4.42 (dd, J = 8.3, 3.7 Hz, 1H), 4.01 (dd, J = 8.3, 3.5 Hz, 1H), 3.74 (d, J = 10.0 Hz, 1H), 3.41-3.33 (m, 1H), 3.11 (dq, J = 9.2, 7.0 Hz, 1H), 0.96 (t, J = 7.0 Hz, 3H); **<sup>13</sup>C NMR** (101 MHz, CDCl<sub>3</sub>) δ 197.41, 144.46, 139.81, 137.04, 135.22, 132.84, 132.67, 129.74, 129.06, 128.67, 128.65, 128.47, 128.28, 128.23, 128.14, 127.95, 127.70, 127.55, 127.44, 127.24, 126.87, 126.50, 125.81, 79.60, 74.71, 72.97, 66.62, 64.56, 55.29, 54.27, 52.11, 45.80, 15.35, 14.73; **HRMS (EI)**:  $m/z$  calc'd for  $[M]^+$   $[C_{25}H_{23}BrO_2]^+$  434.0881, found, 434.0883.

## 5. REFERENCE

1. B. S. Gore, C.-H. Chiang, C. C. Lee, Y.-L. Shih, J.-J. Wang, *Org. Lett.* **2020**, *22*, 7848-7852.
2. M. R. Becker, A. D. Richardson and C. S. Schindler, *Nat Commun.*, 2019, **10**, 5095.

U0376-1  
TPG-476

8.27  
8.23  
8.04  
8.03  
8.03  
8.02  
8.02  
8.01  
8.01  
7.55  
7.54  
7.53  
7.53  
7.51  
7.49  
7.48  
7.47  
7.46  
7.46  
7.45  
7.44  
7.44  
7.37  
7.35  
7.35  
7.34  
7.27  
7.01  
7.01  
6.94

Solvent  $\text{CDCl}_3$   
Spectrometer Frequency 400.28

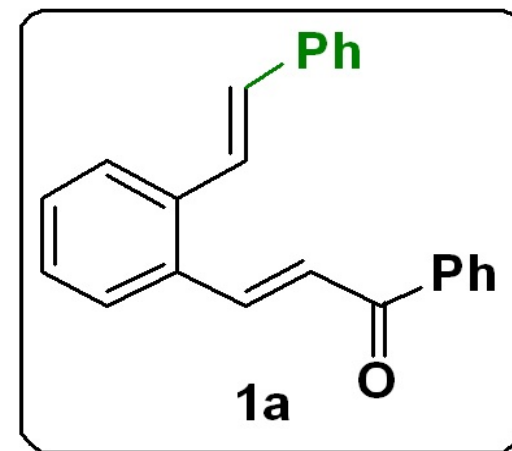

1.72

0.00

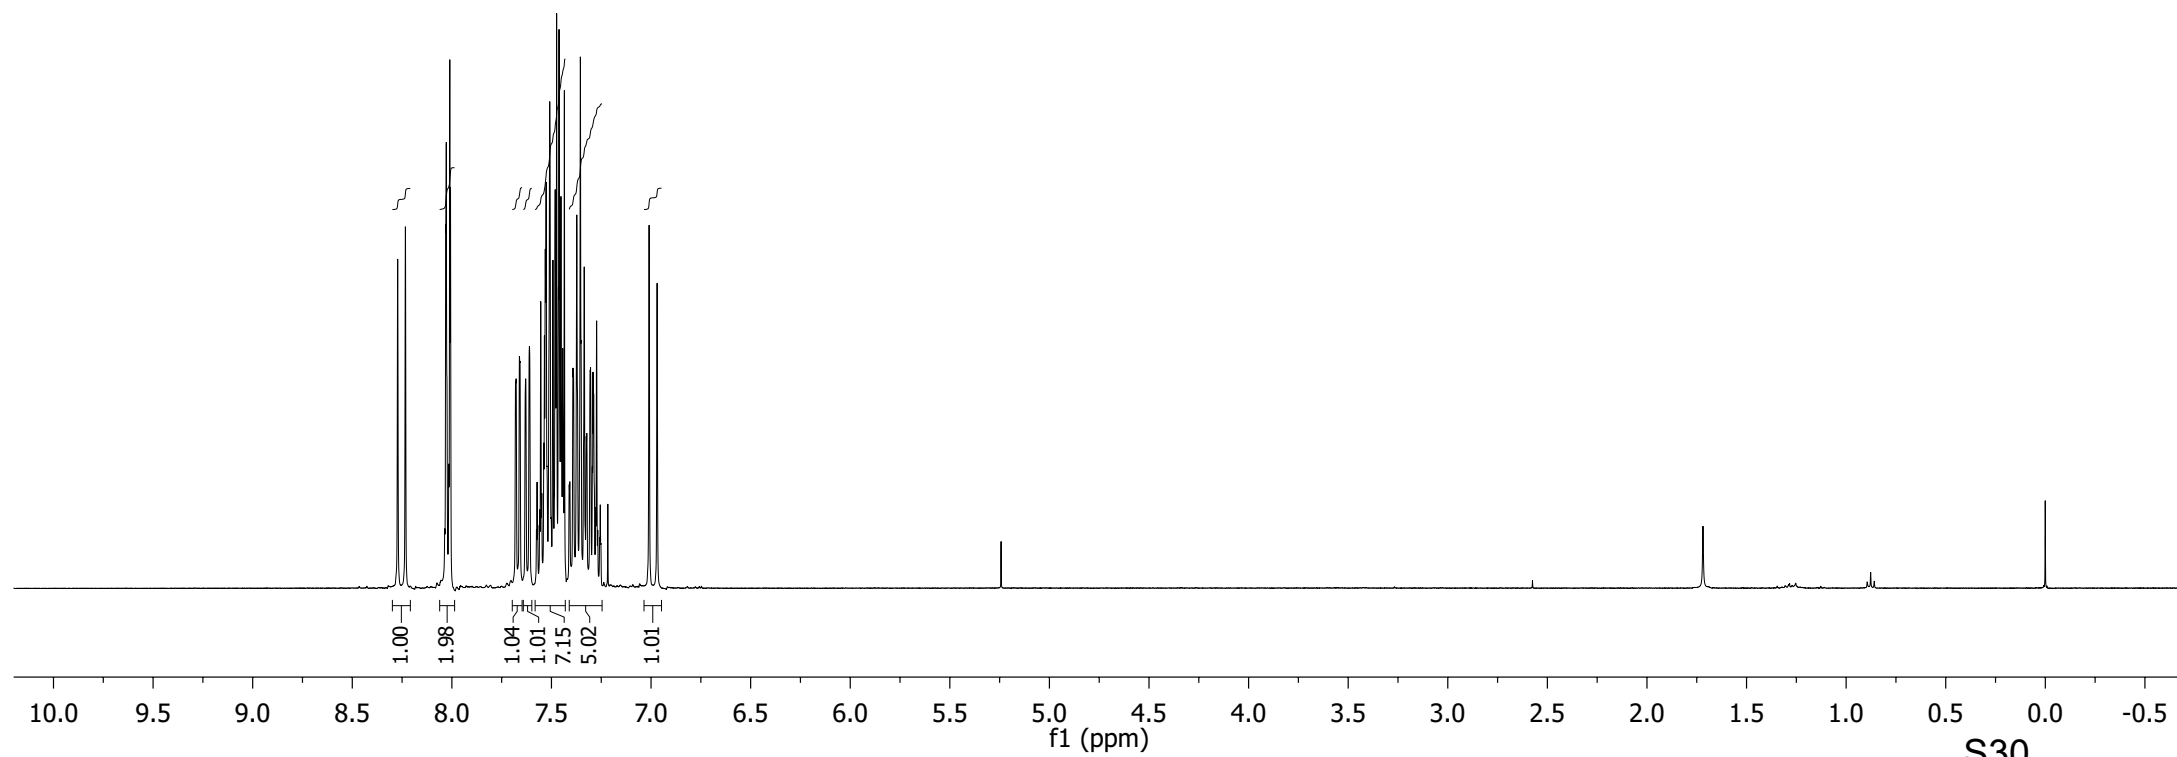

S30

U0376-2  
TPG-476

—190.10

142.43  
137.99  
136.93  
133.29  
132.78  
132.59  
130.19  
128.66  
128.56  
128.46  
128.02  
127.67  
127.39  
126.93  
126.72  
125.48  
124.21

77.32  
77.00  
76.68

Solvent

CDCl<sub>3</sub>

Spectrometer Frequency 100.66

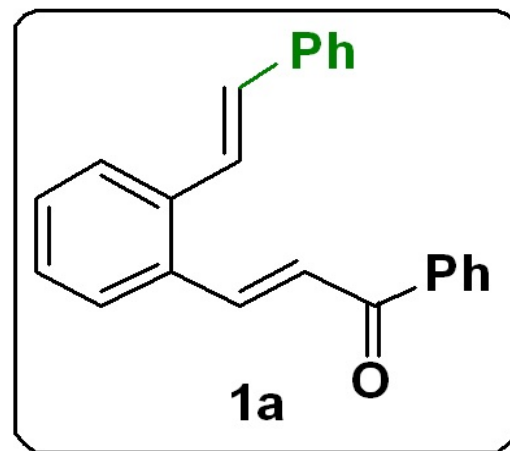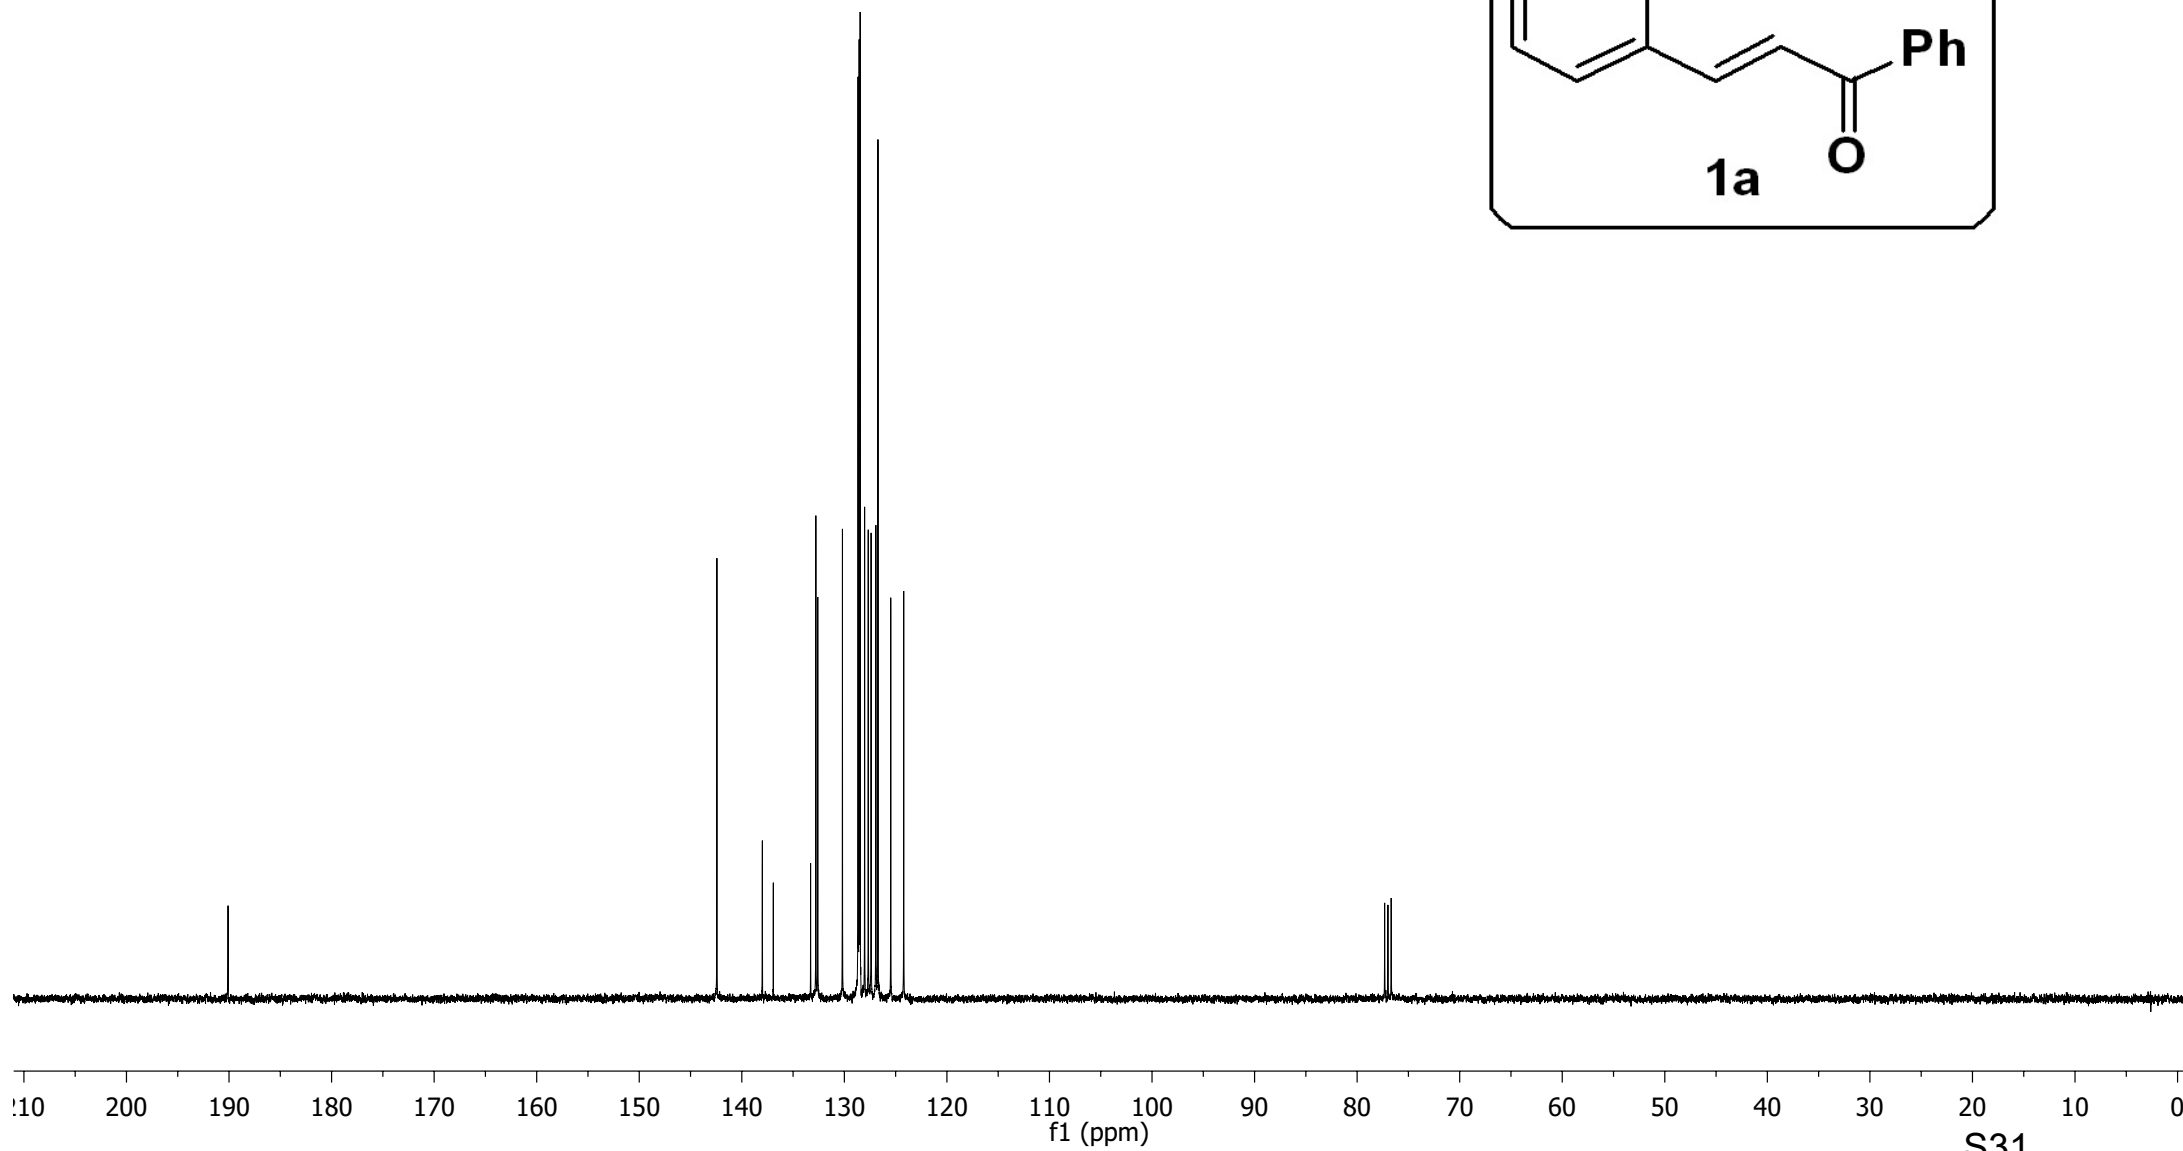

S31

Solvent  
Spectrometer Frequency 400.28

CDCl<sub>3</sub>

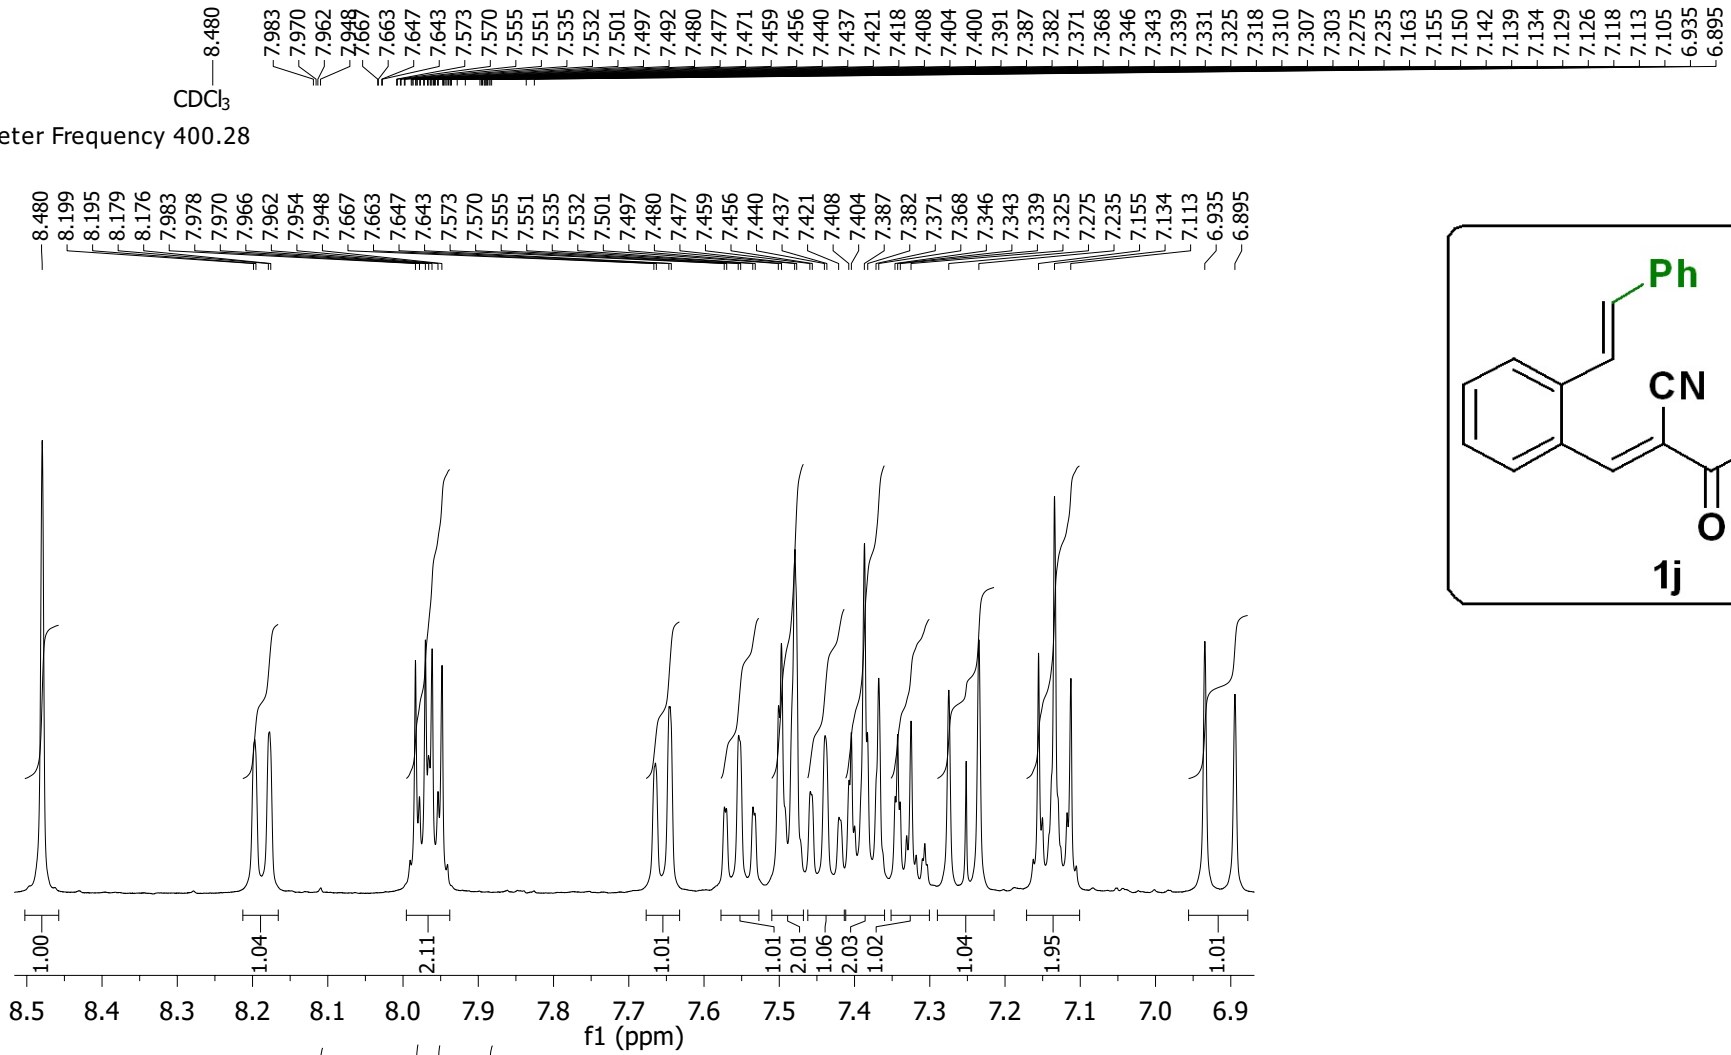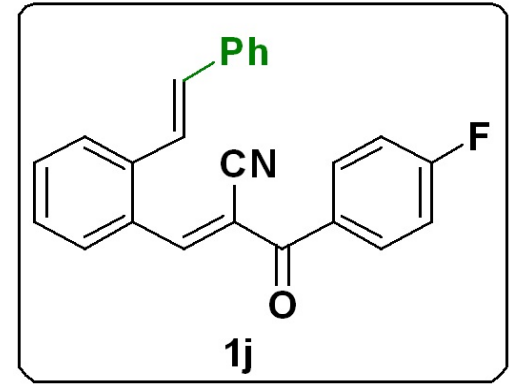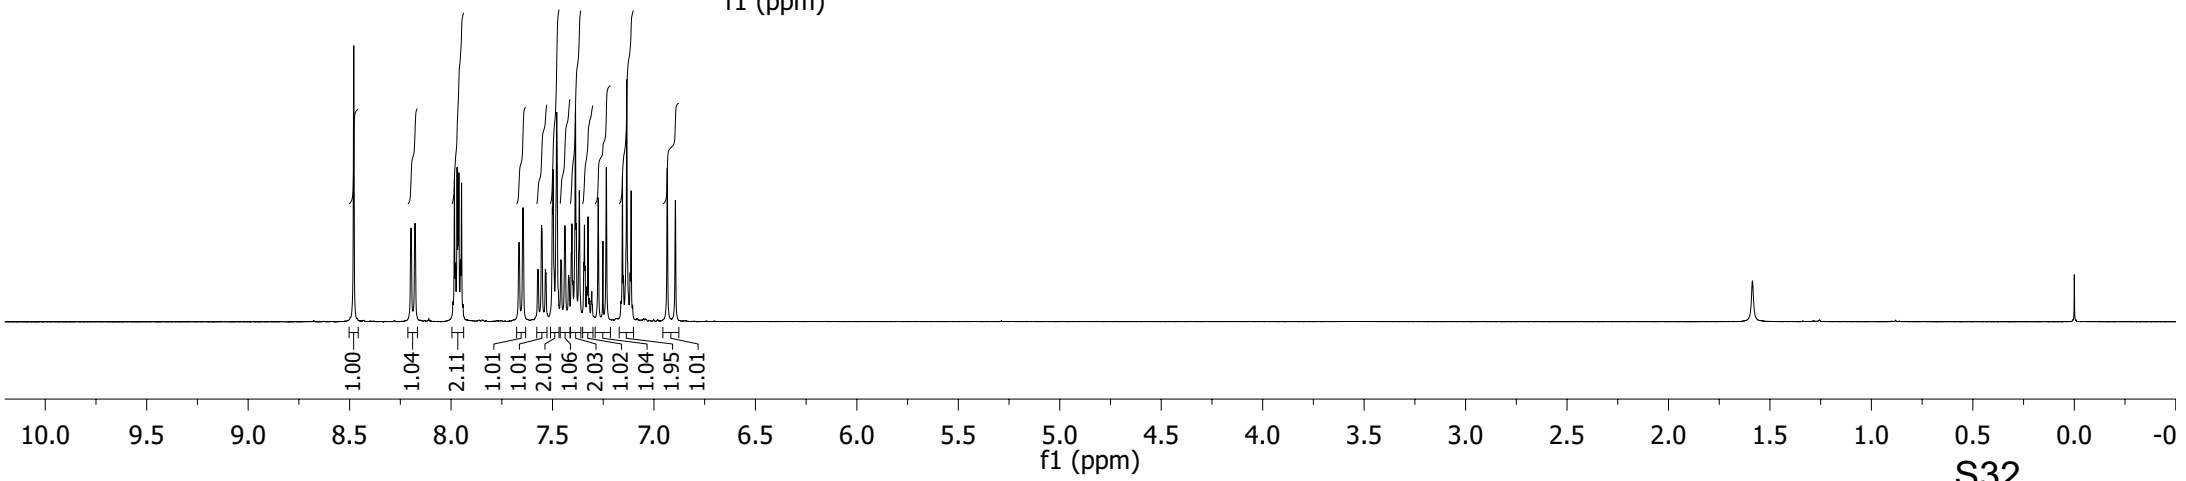



Solvent  $\text{CDCl}_3$   
Spectrometer Frequency 100.66

187.173  
167.101  
164.555  
156.042  
154.591  
139.746  
135.515  
132.684  
132.090  
131.998  
129.869  
128.947  
128.854  
128.686  
127.957  
127.717  
126.844  
124.700  
116.072  
115.852  
111.744

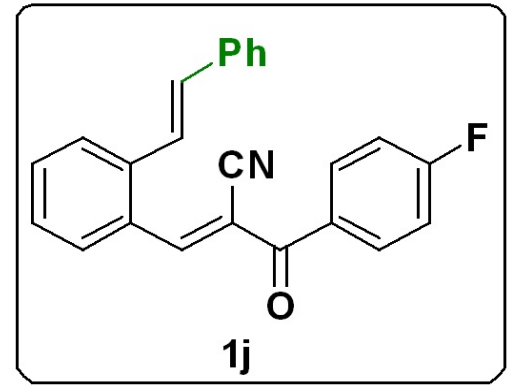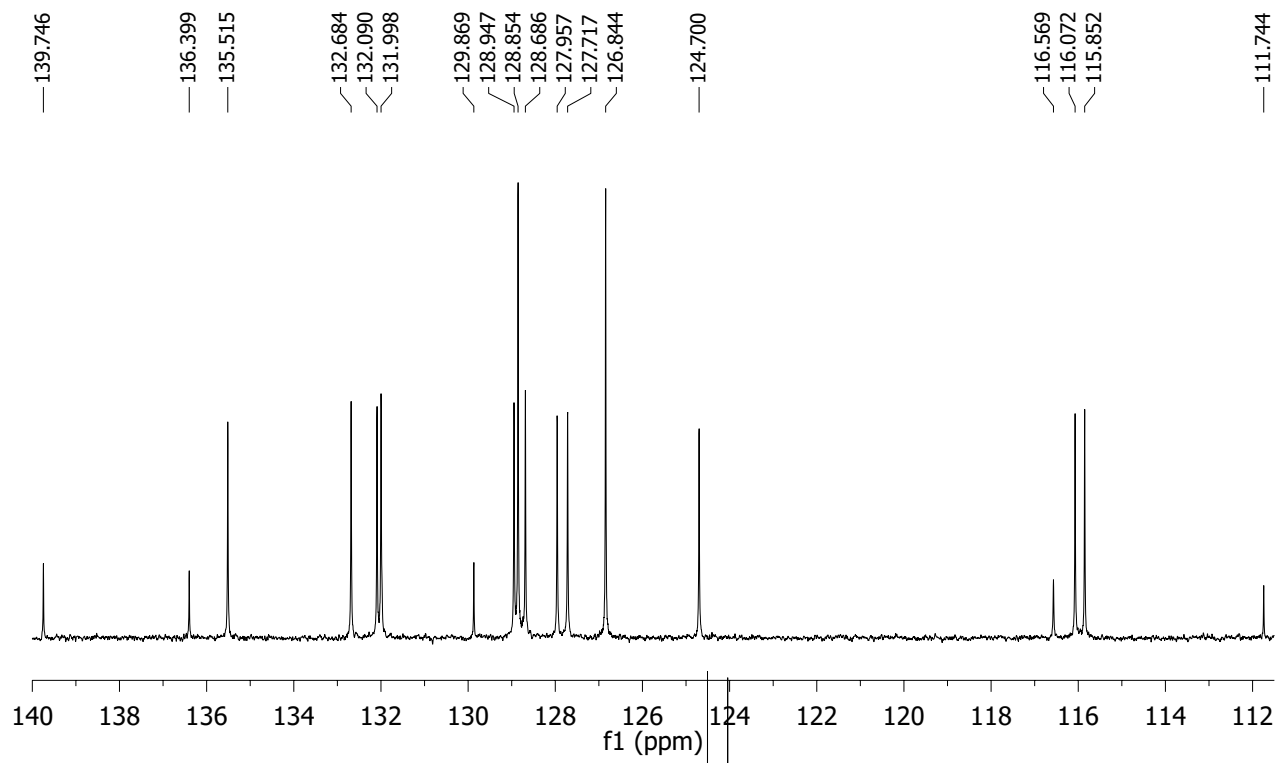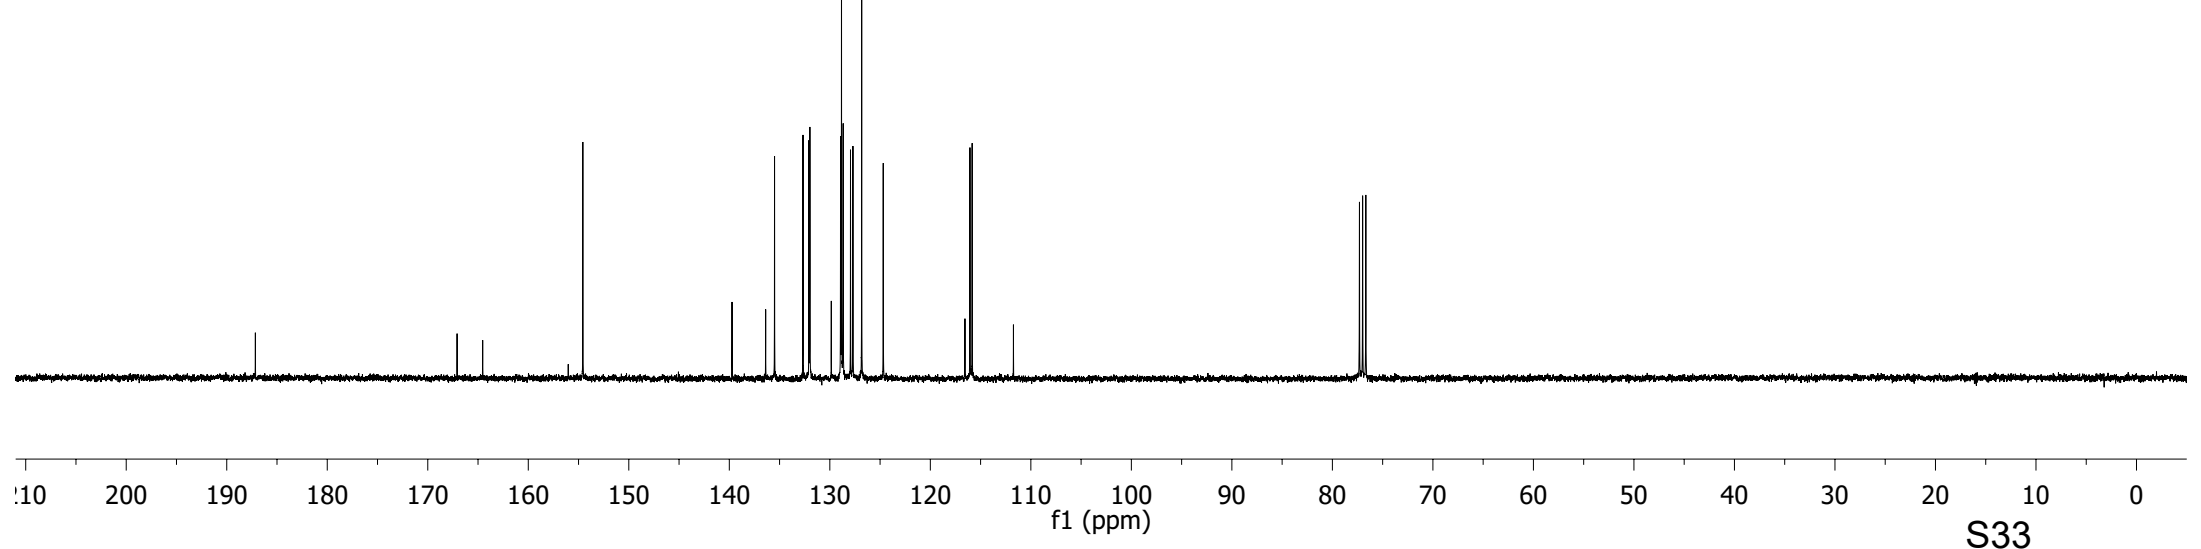

U0013-4  
LW-ds-2

Solvent  $\text{CDCl}_3$   
Spectrometer Frequency 400.28

8.82  
8.16  
8.14  
7.75  
7.75  
7.66  
7.66  
7.65  
7.56  
7.54  
7.53  
7.51  
7.44  
7.43  
7.41  
7.39  
7.38  
7.36  
7.33  
7.31  
7.29  
7.25  
6.94  
6.90  
6.63  
6.63  
6.62  
6.62  
0.00

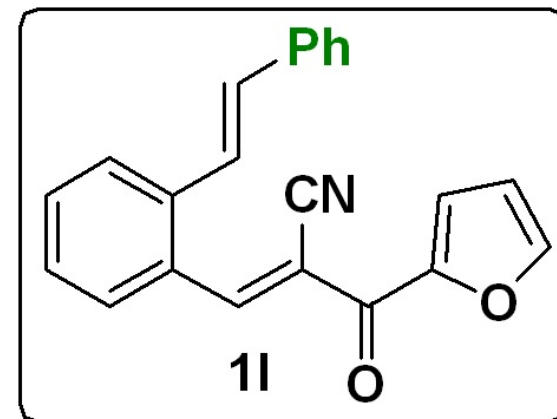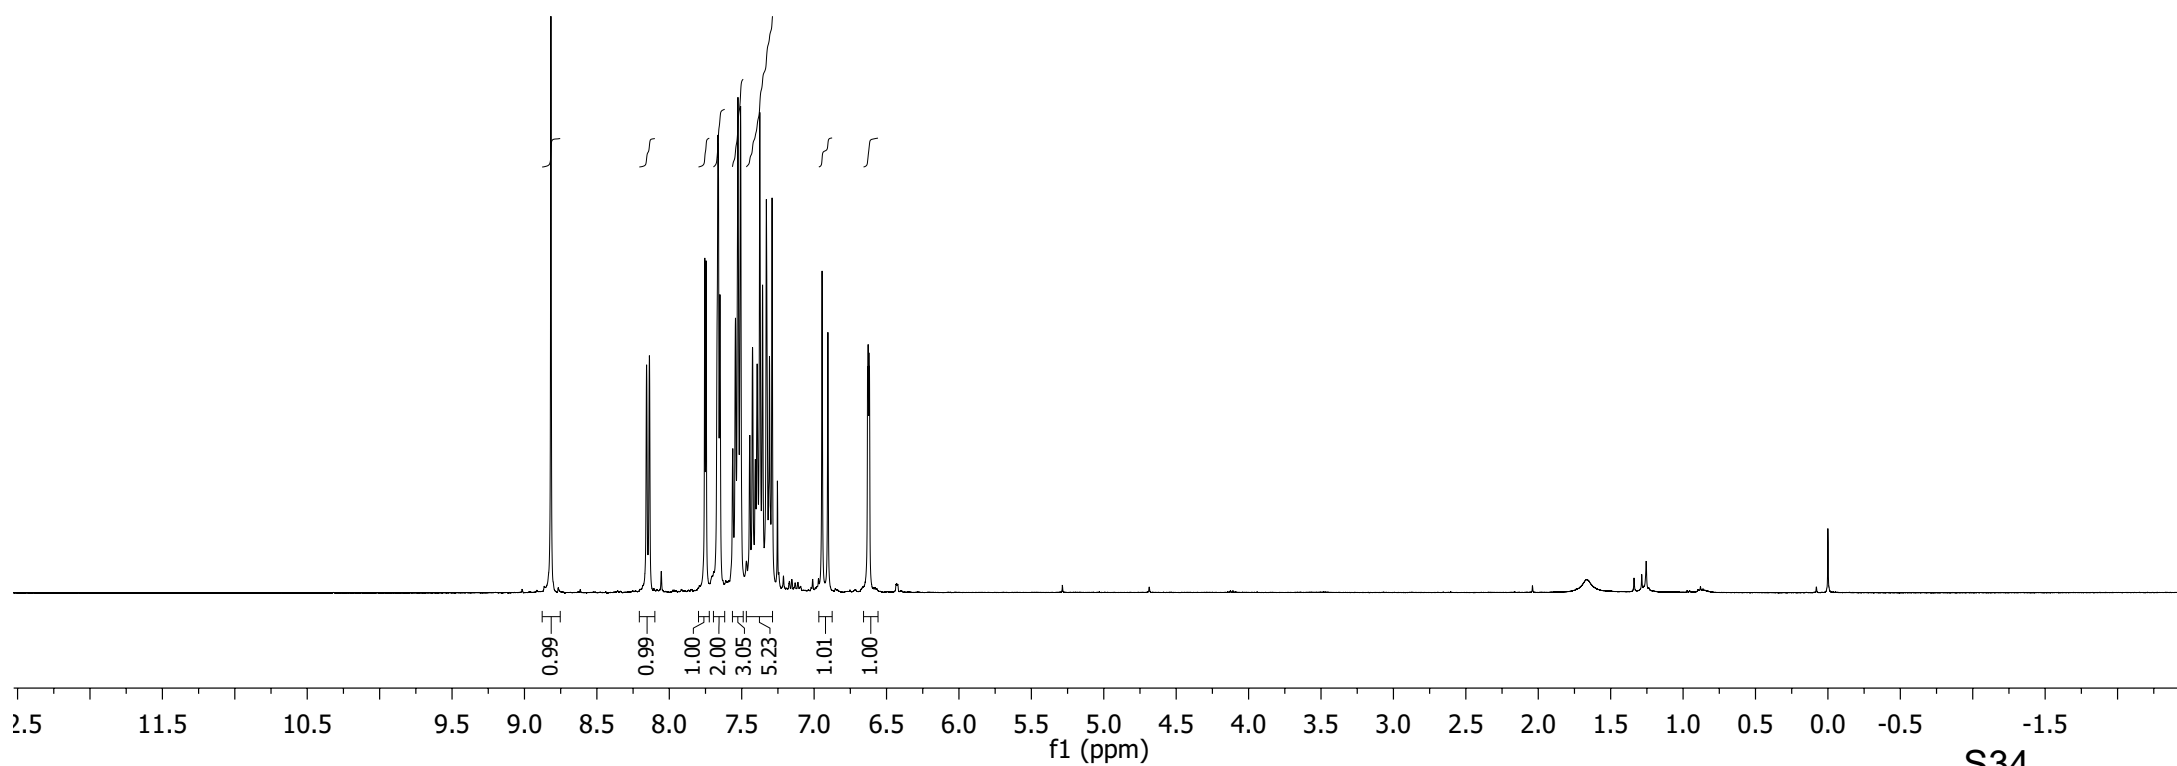

S34

U0013-5  
LW-ds-2

Solvent  $\text{CDCl}_3$   
Spectrometer Frequency 100.66

173.04

154.90  
150.70  
150.63  
148.02  
139.76  
136.50  
135.44  
132.53  
130.03  
129.02  
128.78  
128.55  
127.79  
127.68  
126.89  
124.81  
121.46  
116.78  
114.35  
112.81  
109.97  
109.92

77.31  
77.00  
76.68

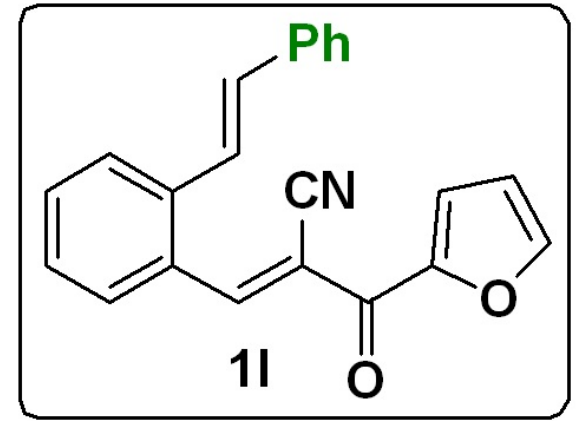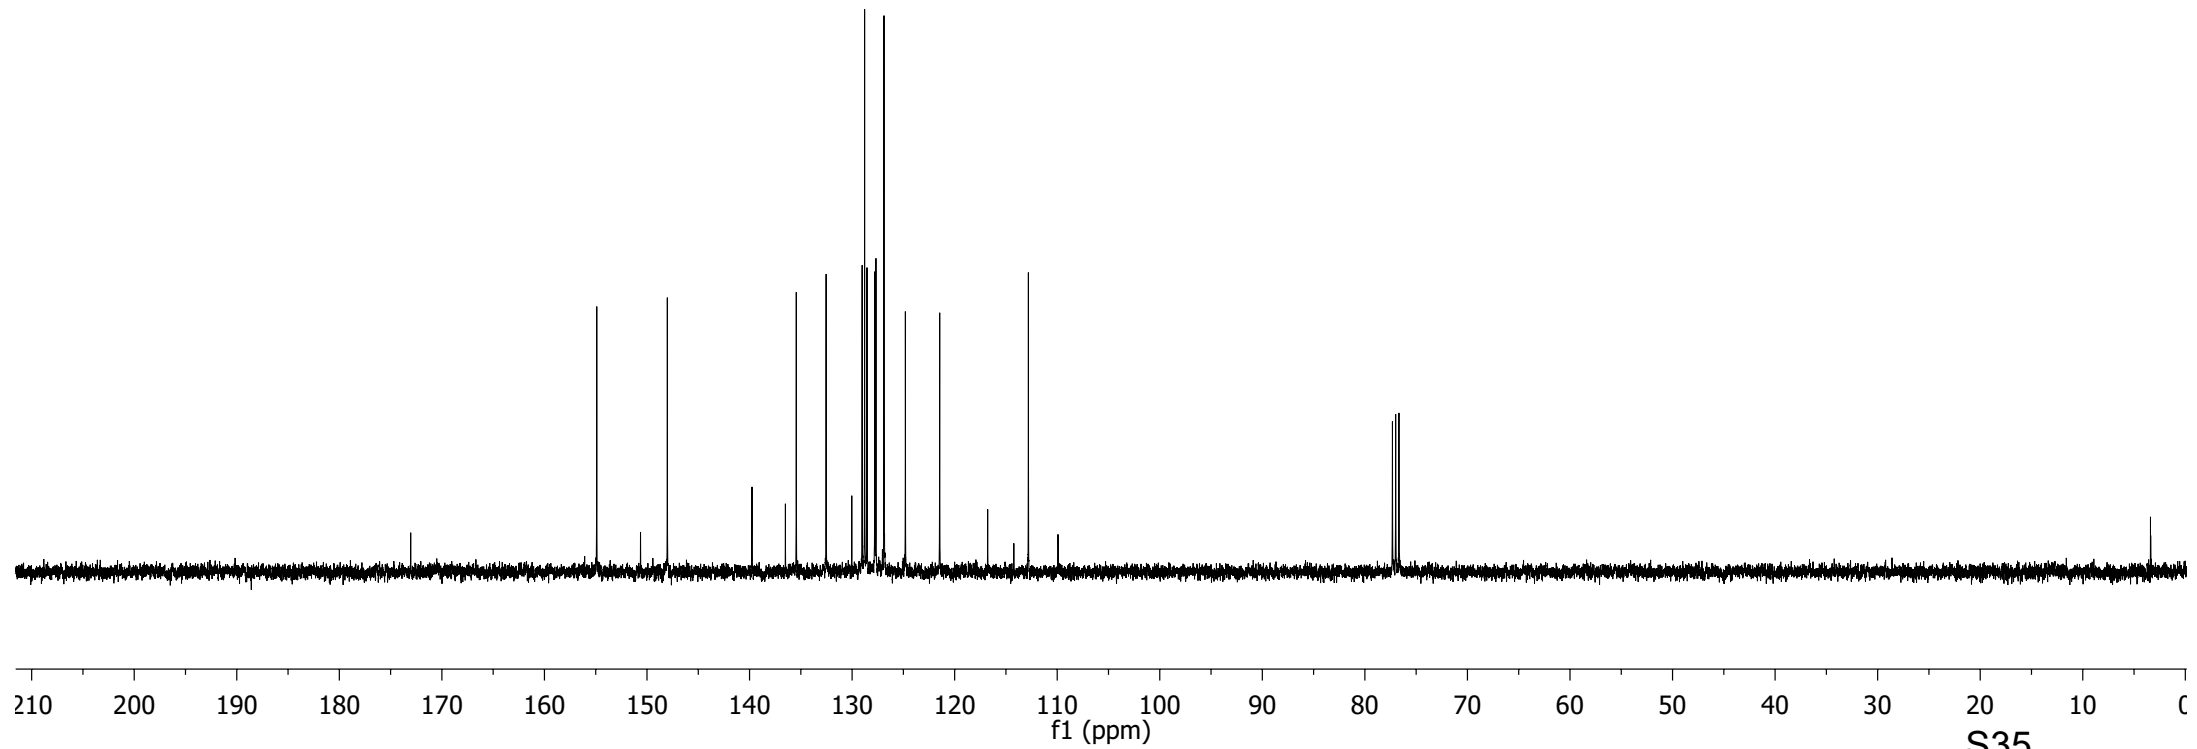

S35

8.416  
8.189  
8.187  
8.170  
8.167  
7.923  
7.920  
7.916  
7.903  
7.899  
7.899  
7.660  
7.660  
7.623  
7.550  
7.546  
7.538  
7.533  
7.530  
7.530  
7.523  
7.519  
7.510  
7.458  
7.452  
6.931  
6.904  
6.888  
6.860

5.616  
5.613  
5.573  
5.570  
5.521  
5.519  
5.494  
5.491

Solvent  $\text{CDCl}_3$   
Spectrometer Frequency 400.40

8.416  
8.189  
8.187  
8.170  
8.167  
7.923  
7.920  
7.916  
7.903  
7.899  
7.899  
7.660  
7.660  
7.623  
7.550  
7.546  
7.538  
7.533  
7.530  
7.530  
7.523  
7.519  
7.510  
7.458  
7.452  
6.931  
6.904  
6.888  
6.860

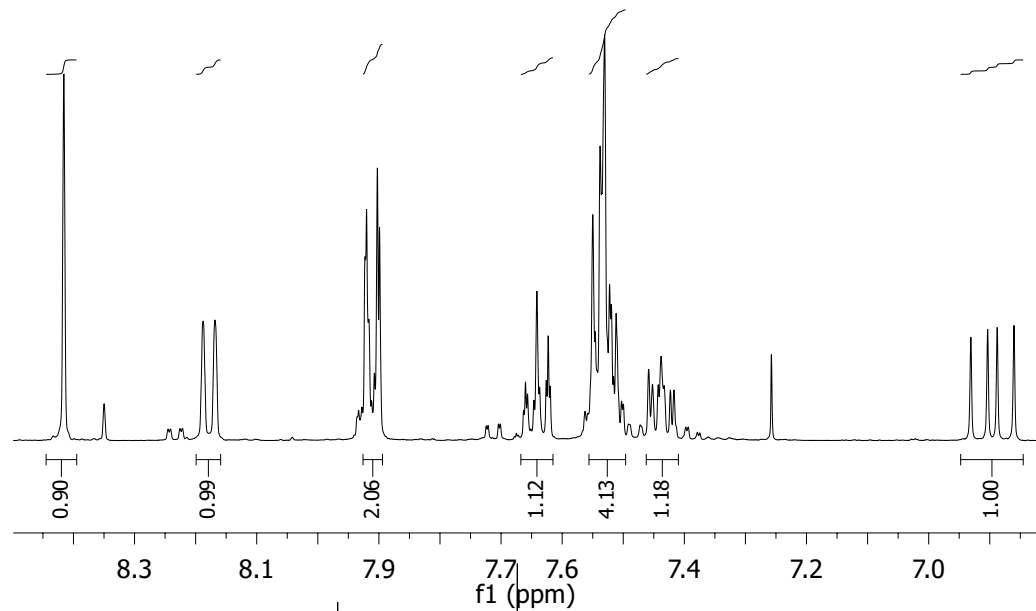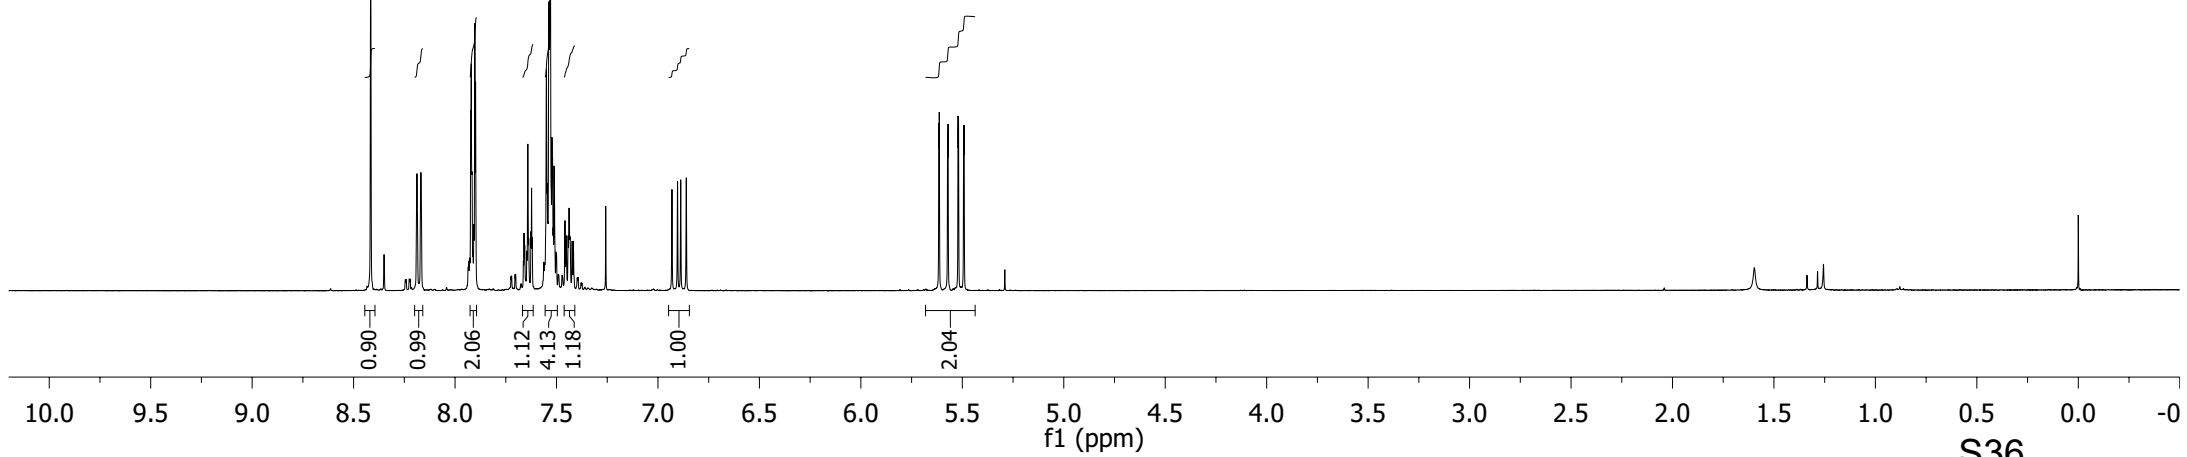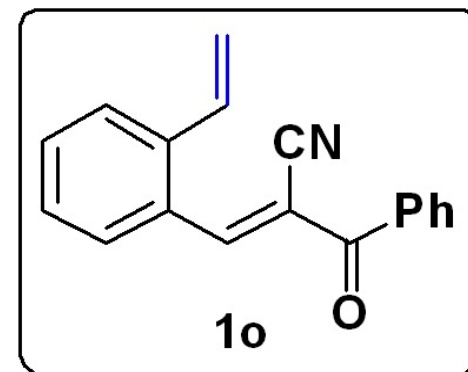

Solvent  $\text{CDCl}_3$   
Spectrometer Frequency 100.69

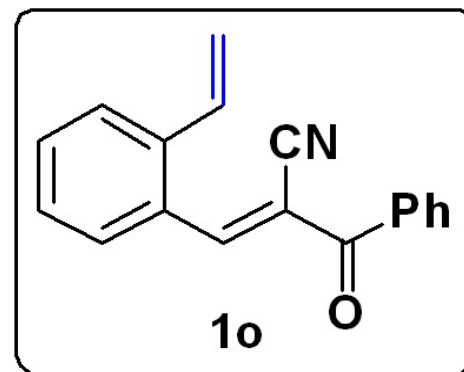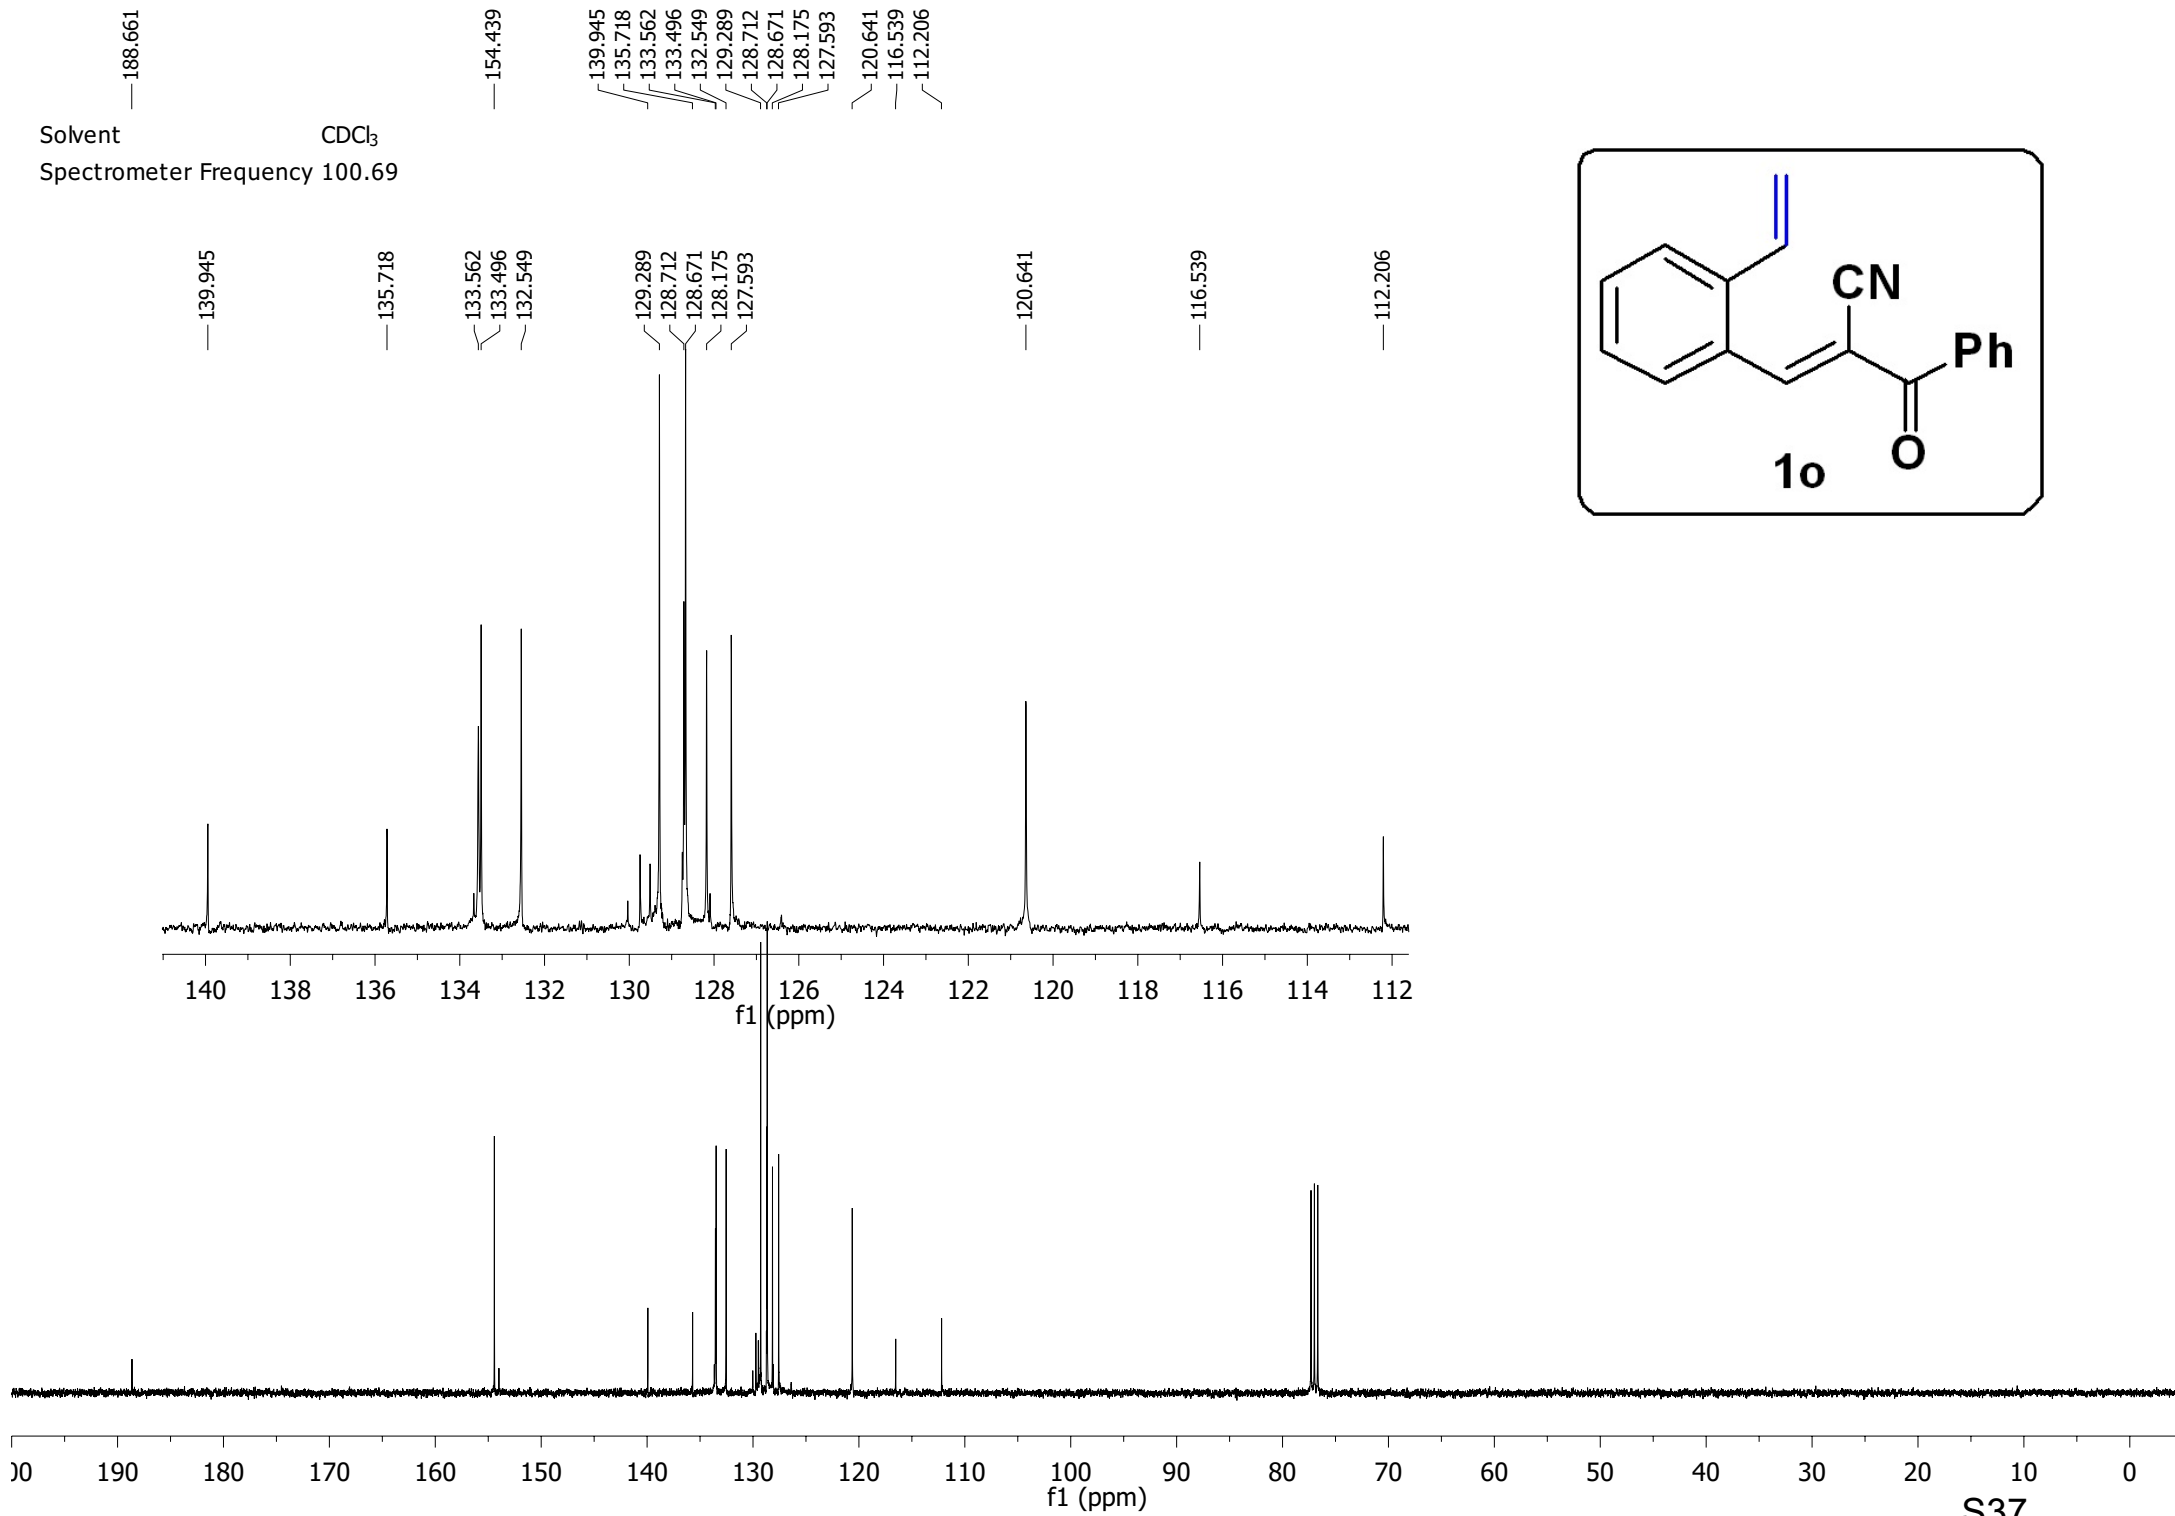

MCP  
LW  
8.32  
8.22  
7.93  
7.91  
7.78  
7.78  
7.76  
7.76  
7.71  
7.66  
7.63  
7.57  
7.57  
7.56  
7.56  
7.45  
7.44  
7.44  
7.43  
7.42  
7.25  
7.22  
7.20  
7.20  
7.18  
6.71  
6.67

Solvent CDCl<sub>3</sub>  
Spectrometer Frequency 400.40

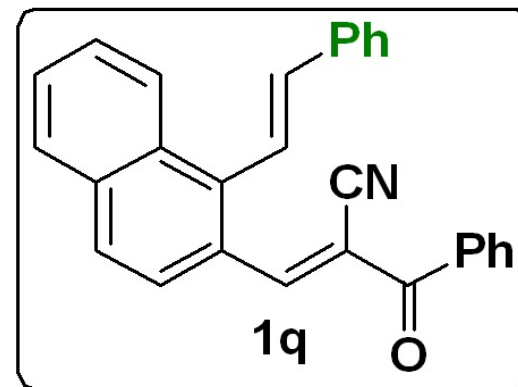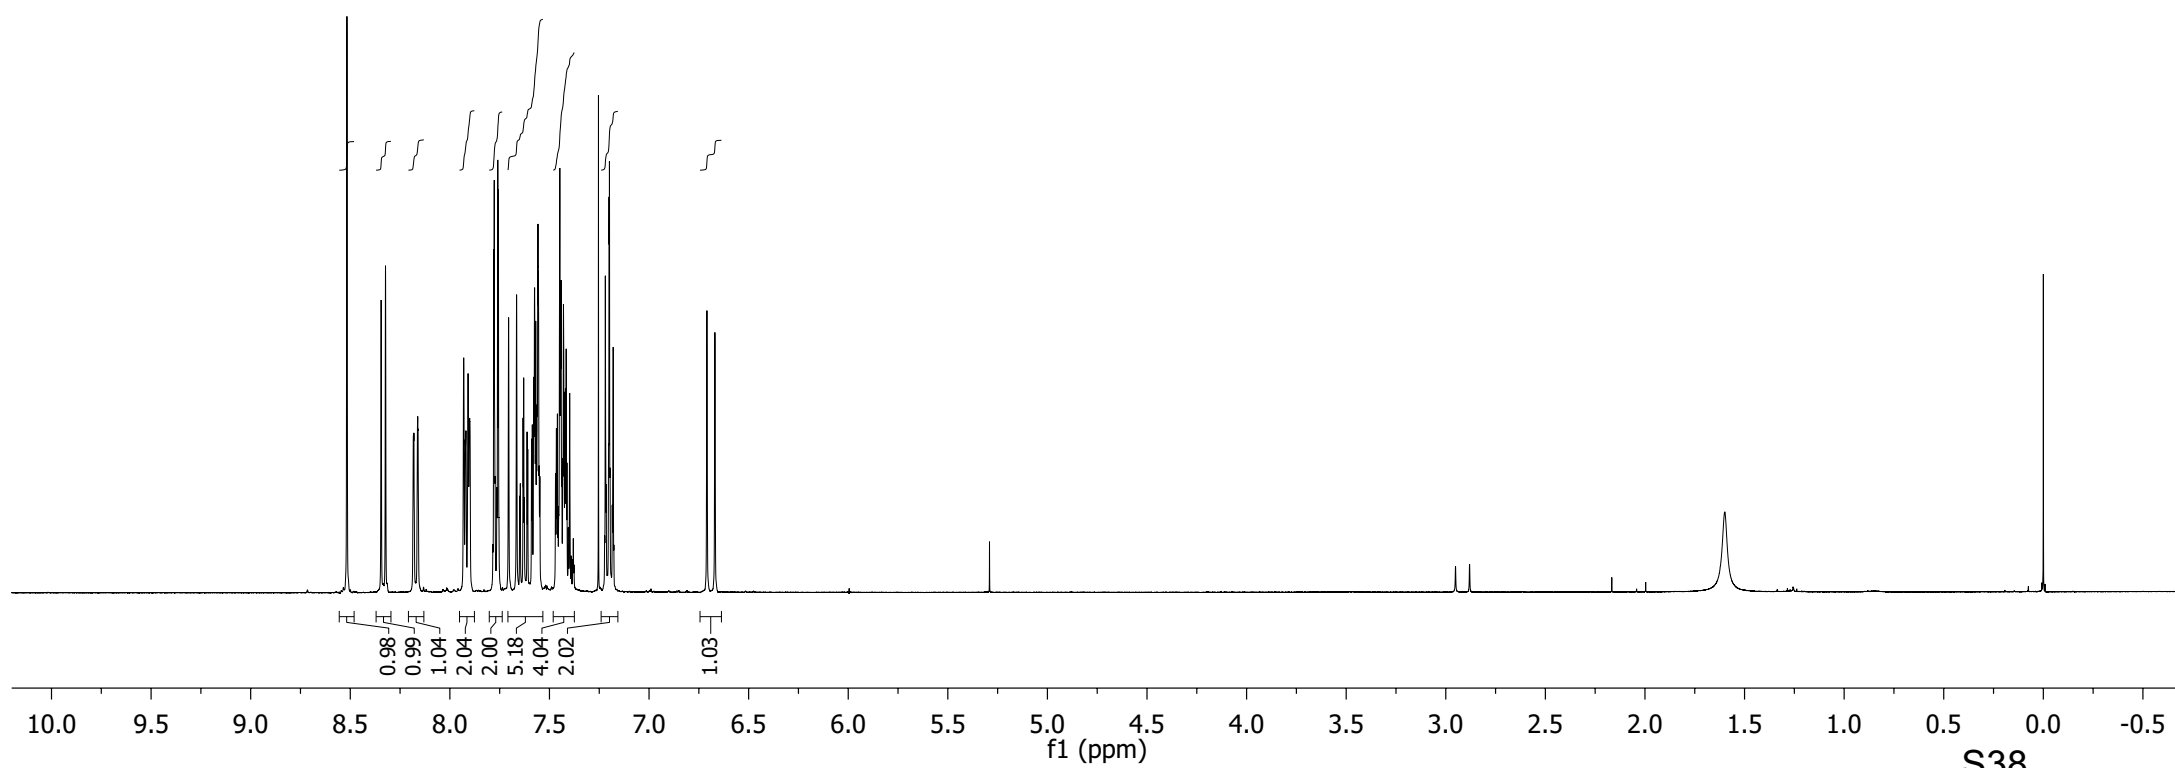

S38

M0036-2  
LW-ds-5

— 189.86

— 156.27  
— 141.32  
— 136.20  
— 132.85  
— 129.02  
— 128.96  
— 128.59  
— 128.52  
— 128.47  
— 128.36  
— 127.89  
— 127.20  
— 126.96  
— 125.88  
— 124.68  
— 123.36  
— 111.76

{ 77.31  
— 76.99  
— 76.67

Solvent

CDCl<sub>3</sub>

Spectrometer Frequency 100.69

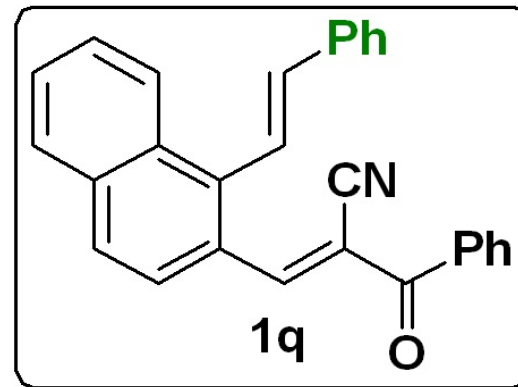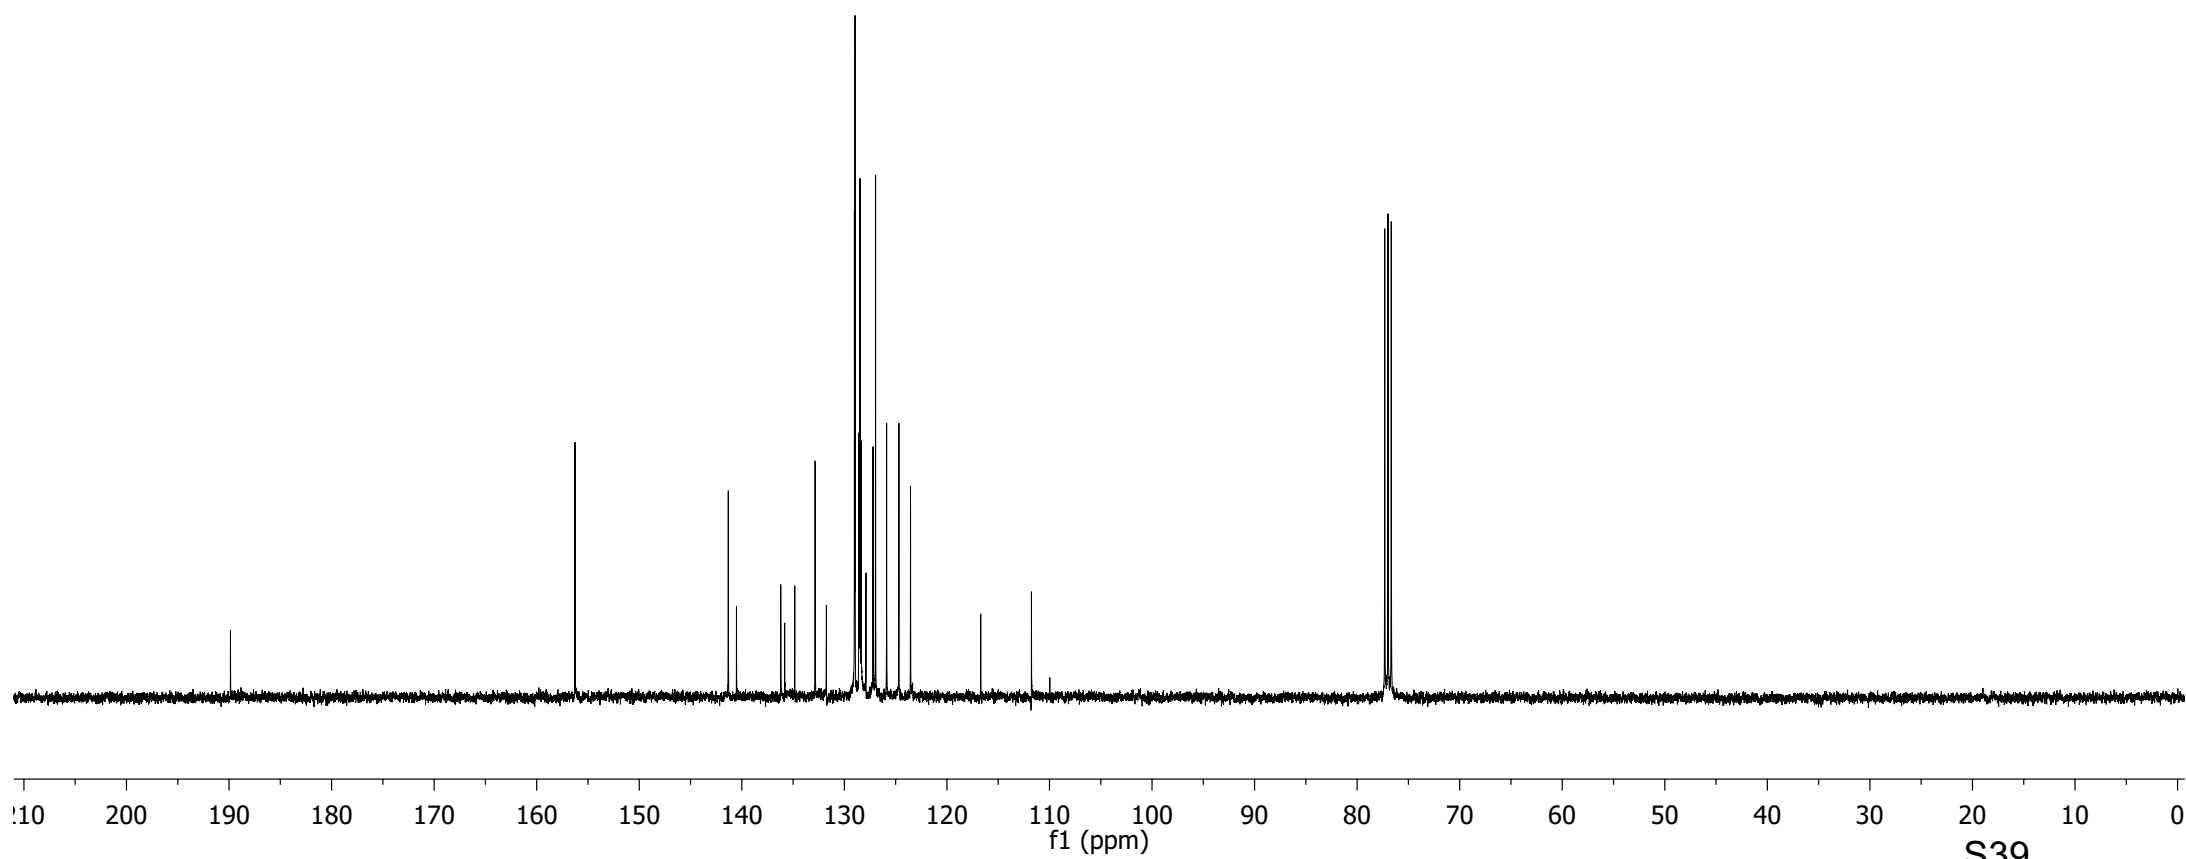

S39

M0027-16  
LW-ds-4

Solvent  $\text{CDCl}_3$   
Spectrometer Frequency 400.40

8.47 8.20 8.18 7.91 7.91 7.90 7.89 7.89 7.64 7.62 7.62 7.61 7.60 7.59 7.59 7.58 7.55 7.55 7.53 7.51 7.51 7.49 7.47 7.47 7.45 7.45 7.44 7.43 7.42 7.42 7.39 7.39 7.26 7.26 7.13 7.13 7.09 7.09 6.93 6.93 6.92 6.92 6.91 6.91 6.88 6.88 6.84 6.84 3.87 3.85

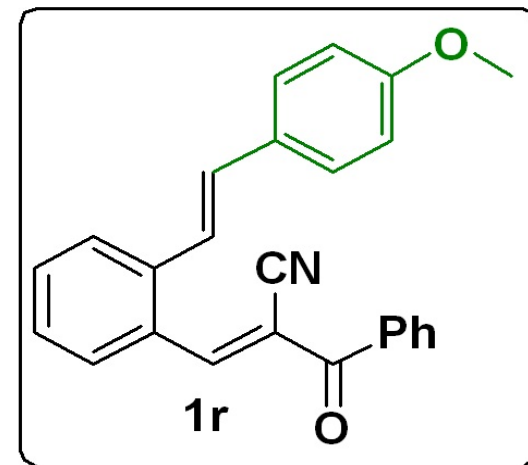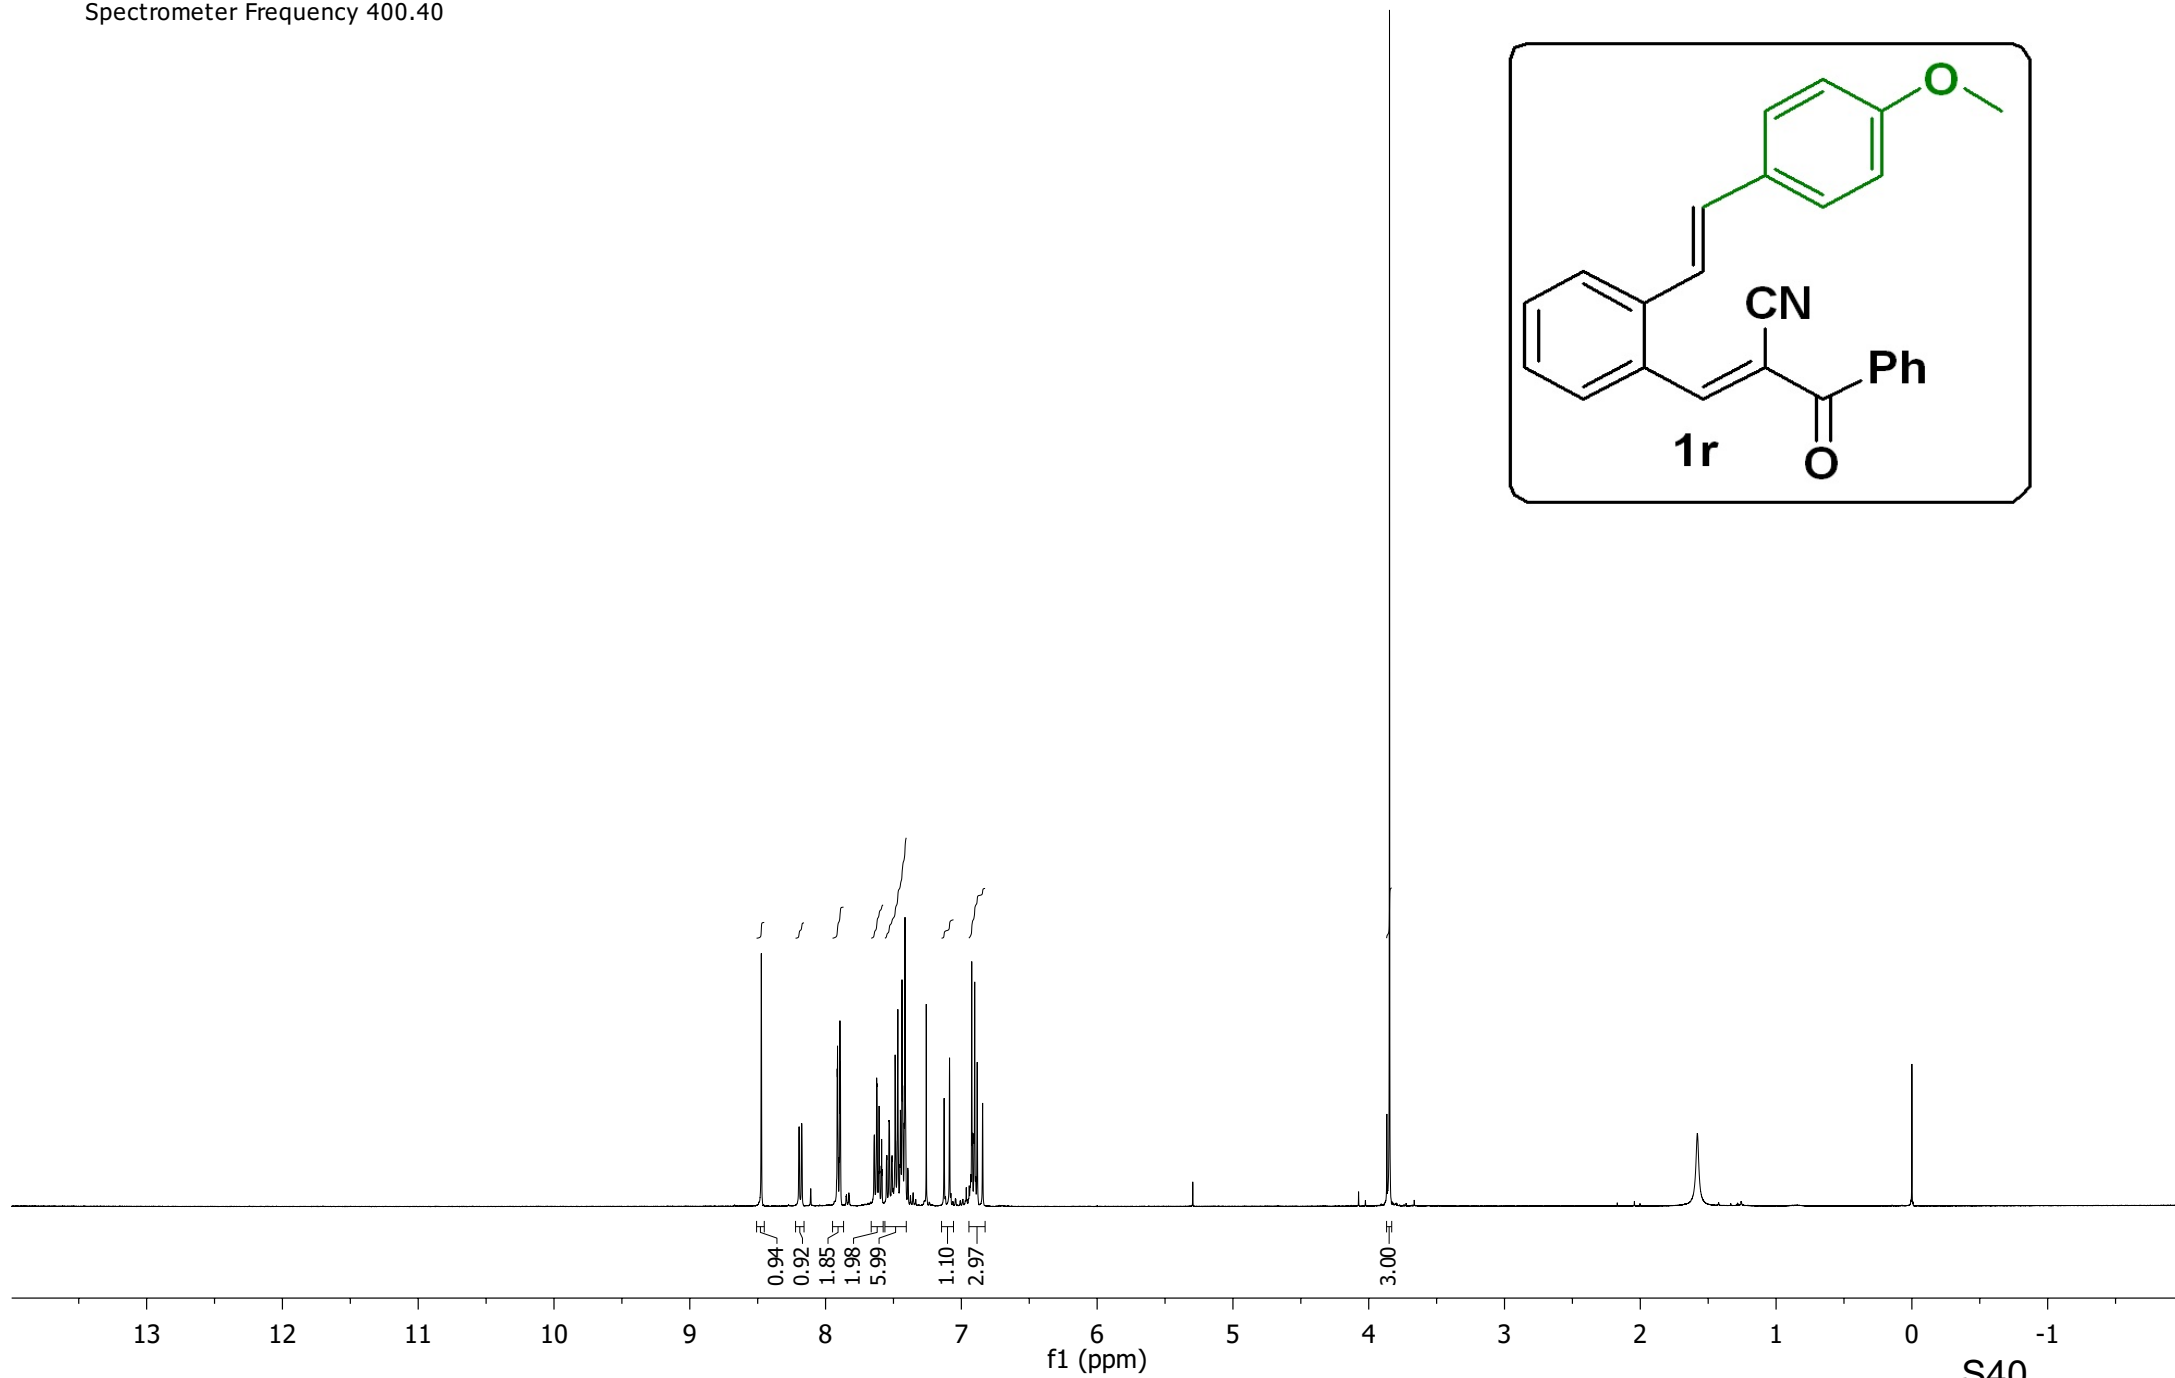

**1r**

S40



M0027-17  
LW-ds-4

—189.06

—160.05

—154.74

—140.05

—135.85

—134.99

—133.35

—132.55

—129.73

—129.31

—129.26

—128.97

—128.66

—128.22

—127.56

—127.46

—122.59

—116.53

—114.25

—112.05

—77.31

—76.99

—76.68

—55.37

Solvent  $\text{CDCl}_3$   
Spectrometer Frequency 100.69

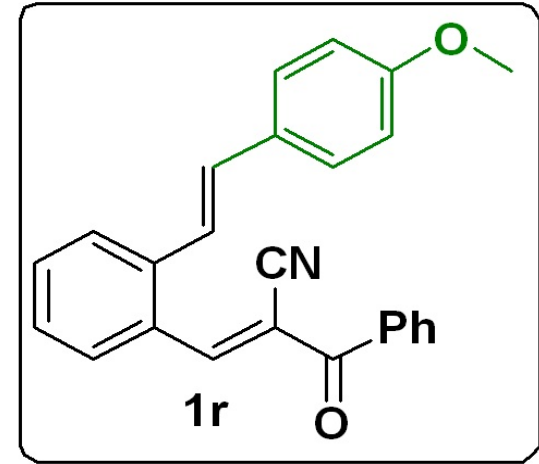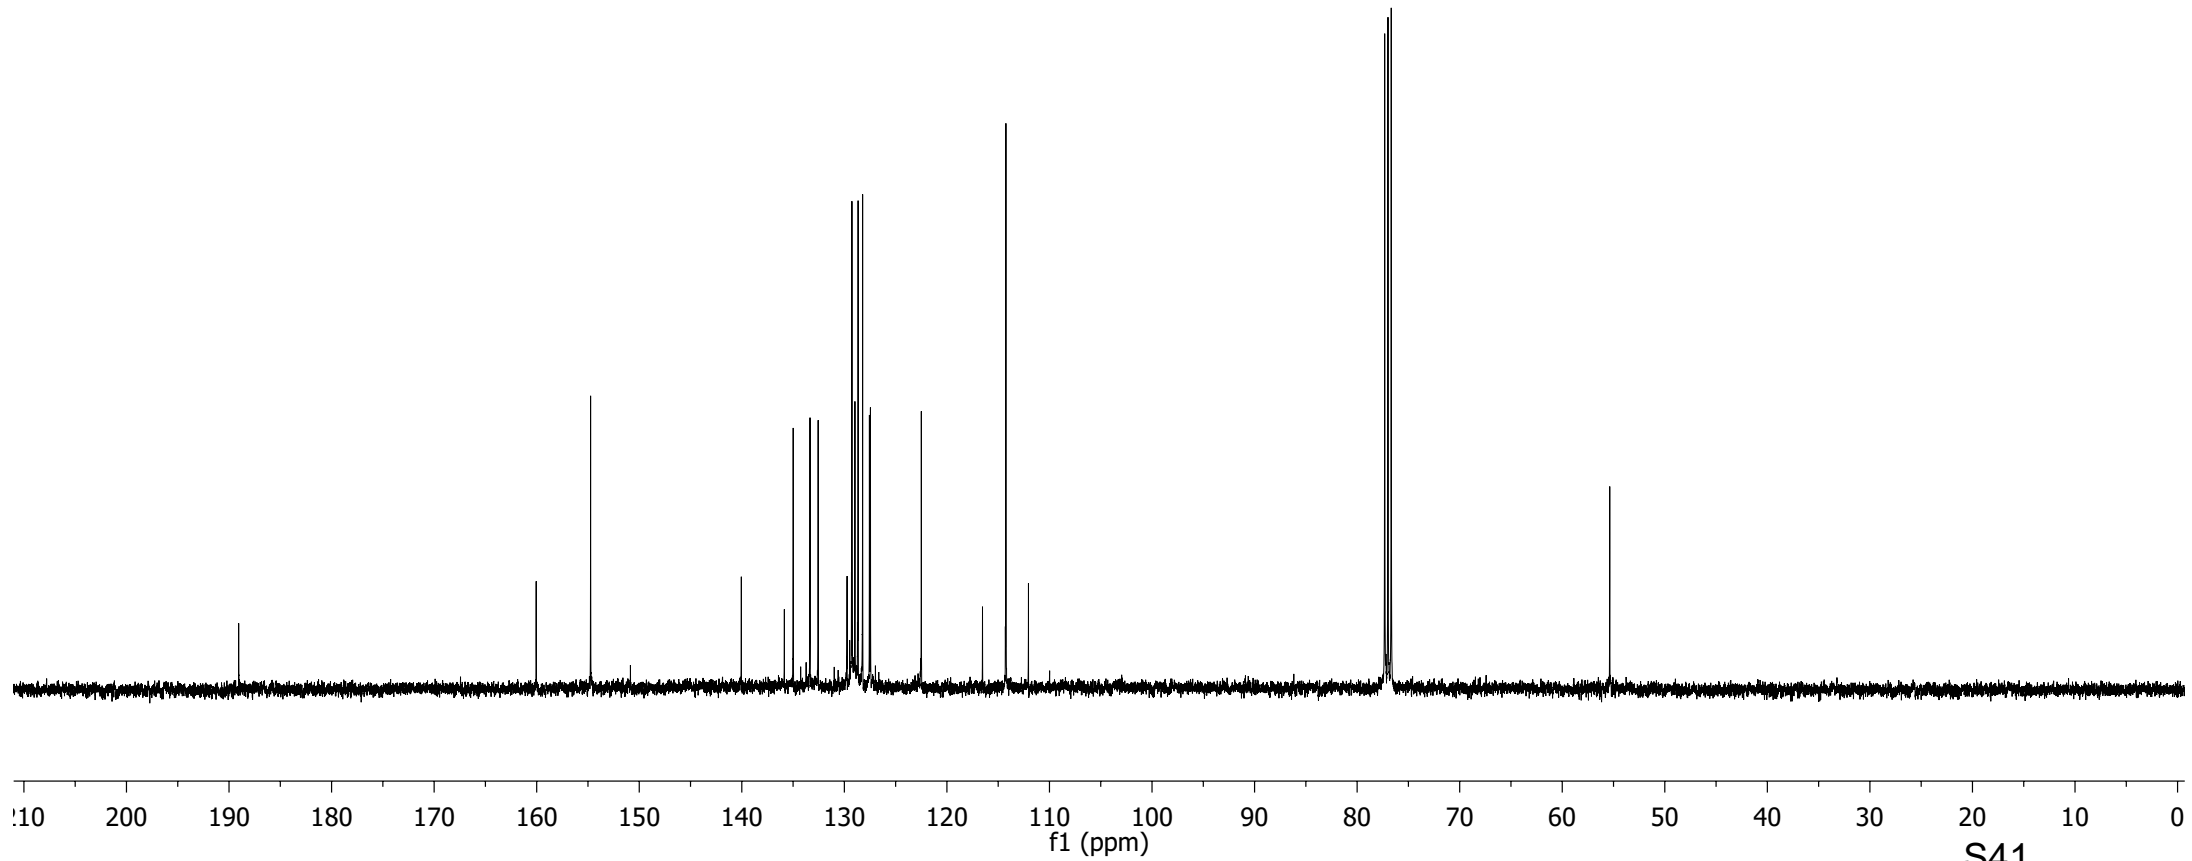

S41

M0024-7  
LW-ds-3

8.46  
8.20  
8.18  
7.92  
7.90  
7.48  
7.42  
7.40  
7.36  
7.34  
7.33  
6.89  
6.85

Solvent CDCl<sub>3</sub>  
Spectrometer Frequency 400.40

M0024-7  
LW-ds-3

7.92  
7.92  
7.91  
7.90  
7.90  
7.65  
7.64  
7.62  
7.55  
7.55  
7.50  
7.48  
7.47  
7.47  
7.45  
7.42  
7.40  
7.40  
7.36  
7.35  
7.34  
7.26  
7.24  
7.20

6.89  
6.85

1.58  
-0.00

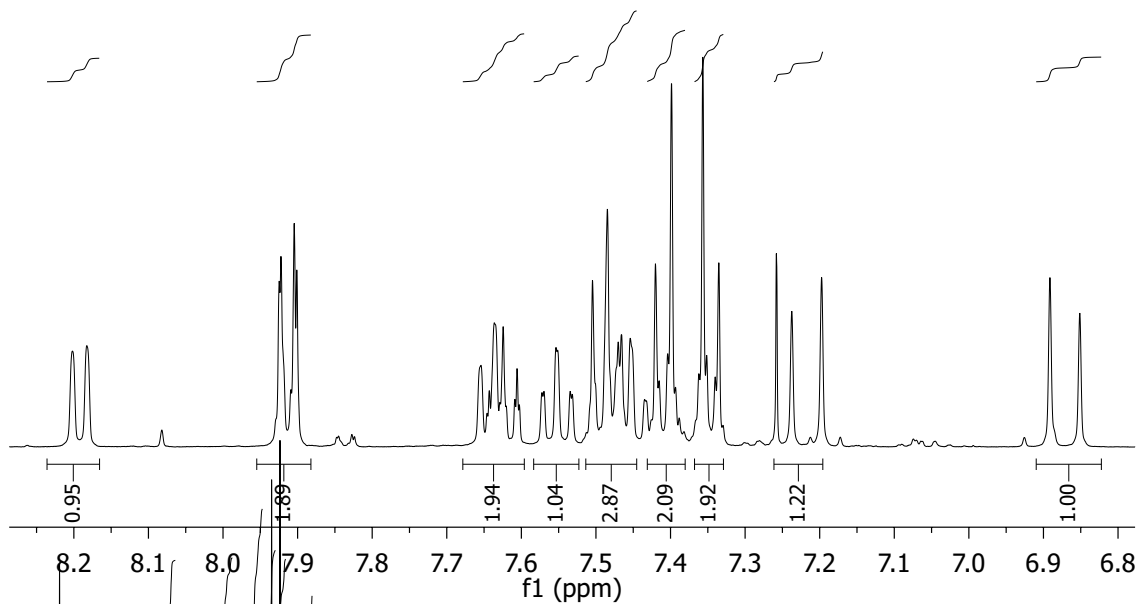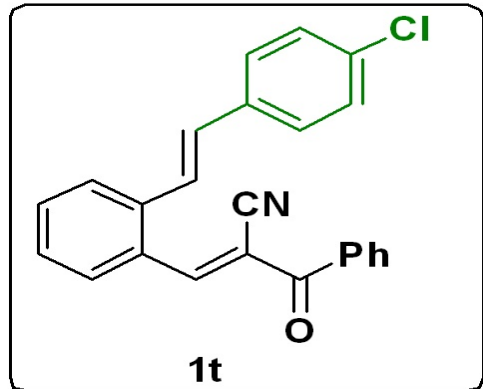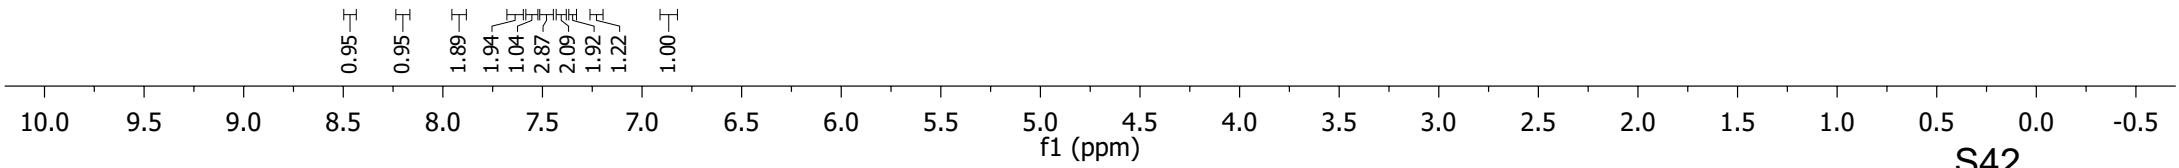

M0024-8  
LW-ds-3

— 188.77

— 154.32

139.20

135.74

134.30

133.87

133.49

132.60

130.02

129.27

129.01

128.68

128.17

128.01

127.61

126.44

— 112.41

77.31

76.99

76.68

Solvent  $\text{CDCl}_3$   
Spectrometer Frequency 400.40

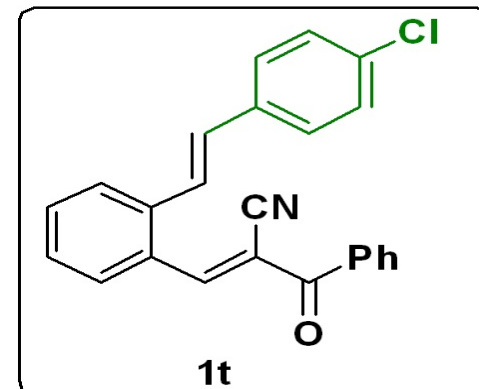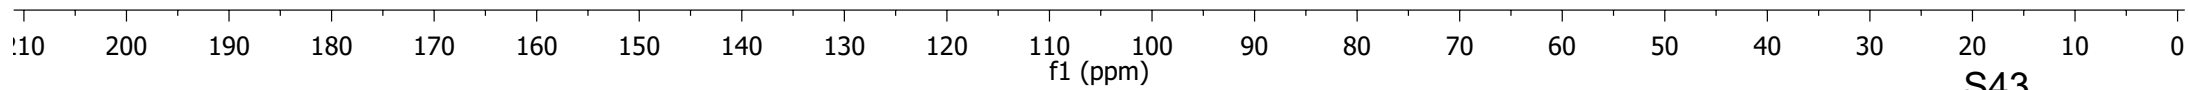

S43

Solvent CDCl<sub>3</sub>  
Spectrometer Frequency 400.28

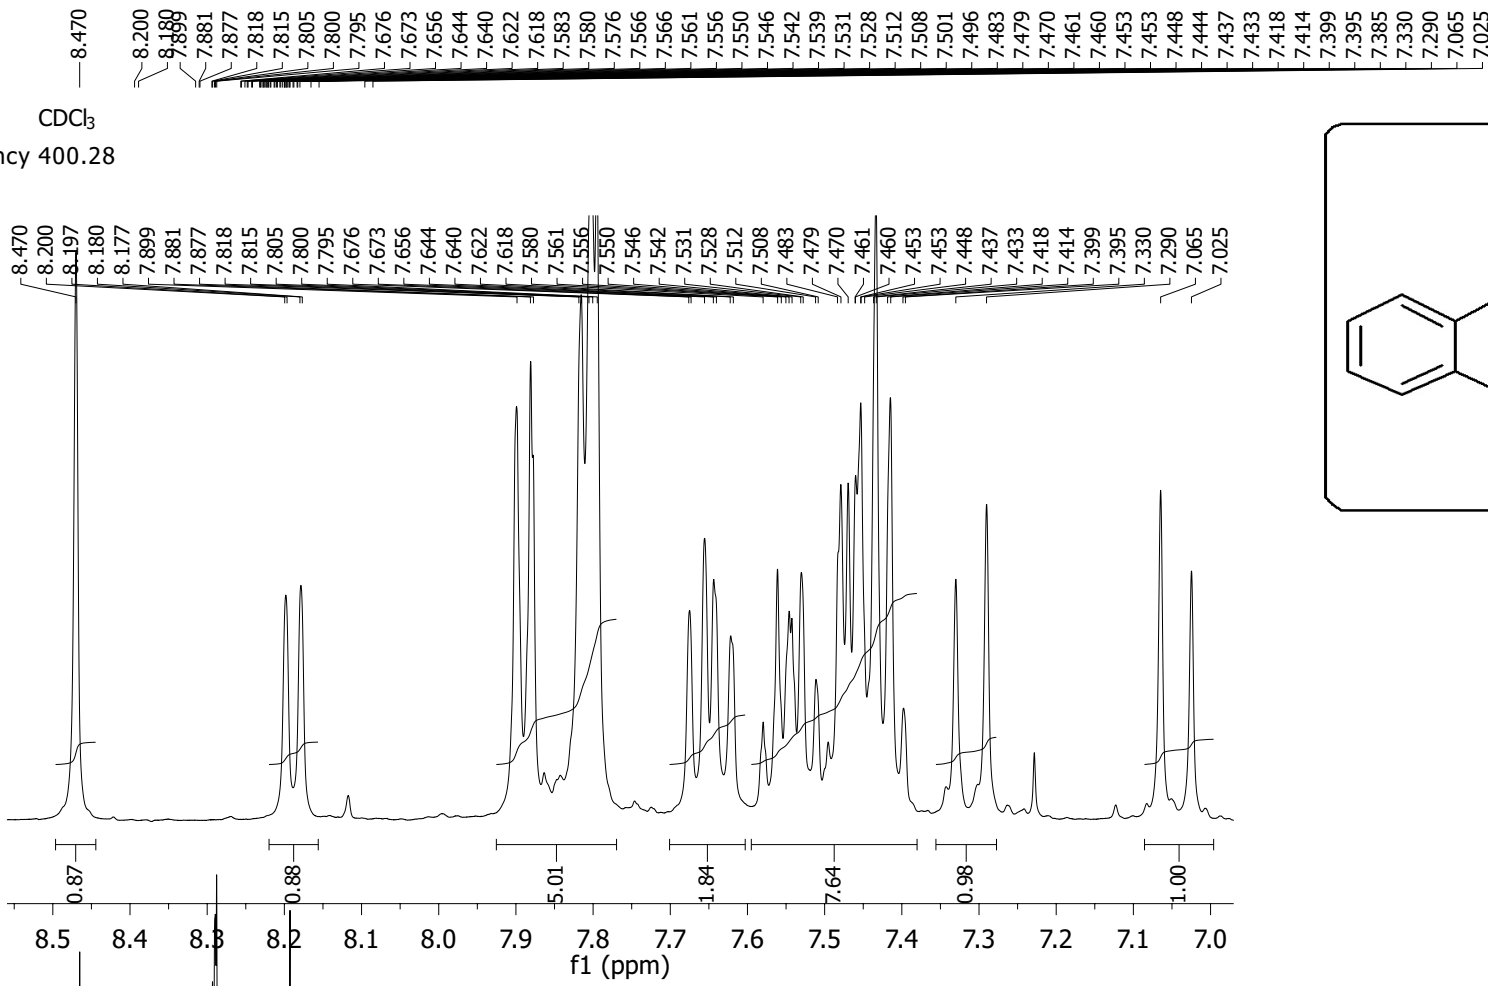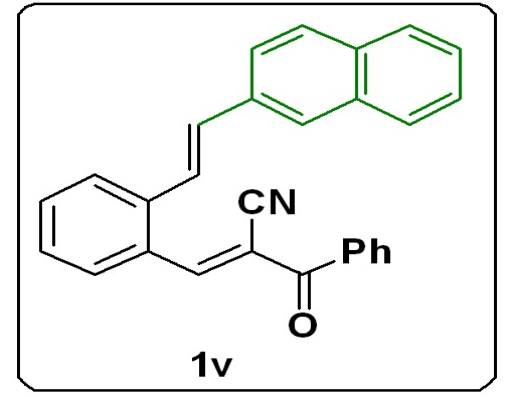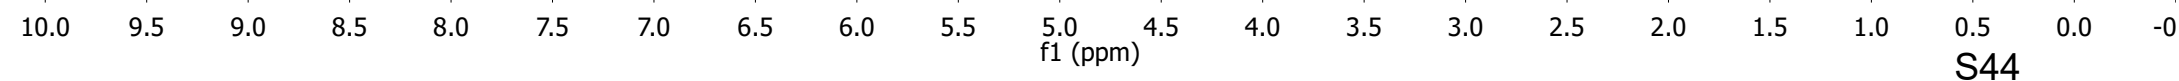

Solvent — 189.019  
CDCl<sub>3</sub>  
Spectrometer Frequency 100.66

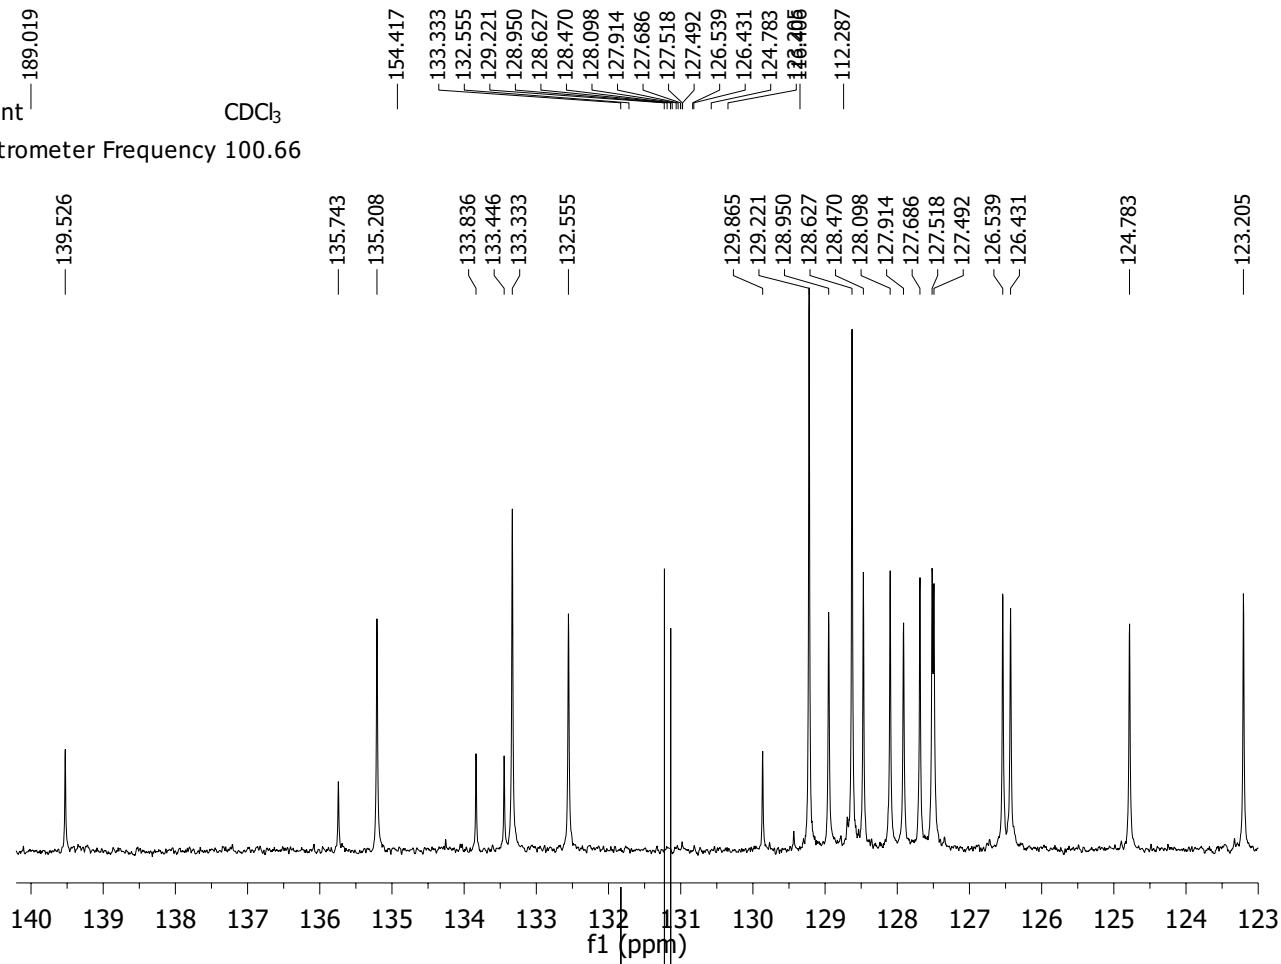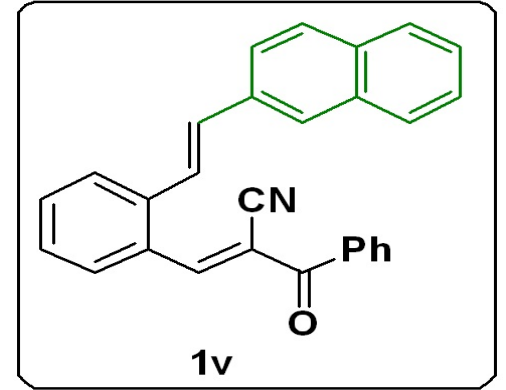

190 180 170 160 150 140 130 120 110 100 90 80 70 60 50 40 30 20 10 0  
f1 (ppm)

Solvent  $\text{CDCl}_3$   
Spectrometer Frequency 400.28

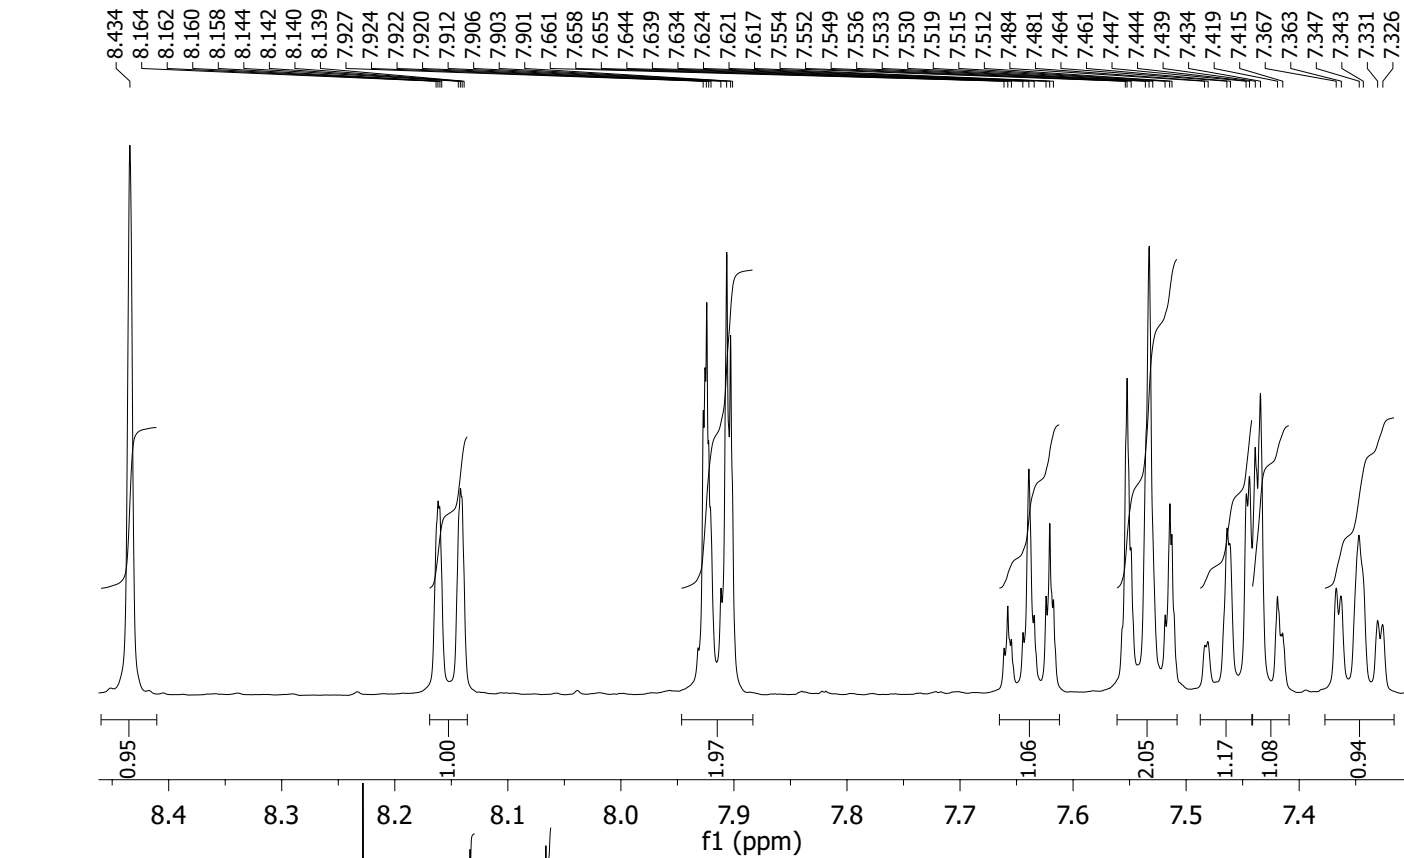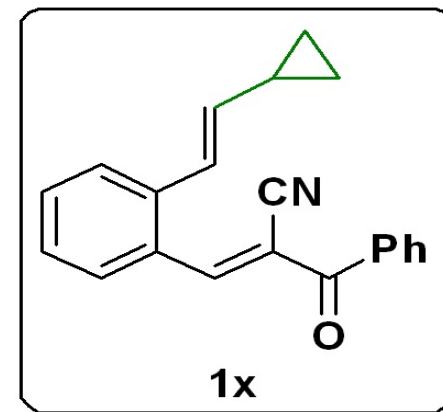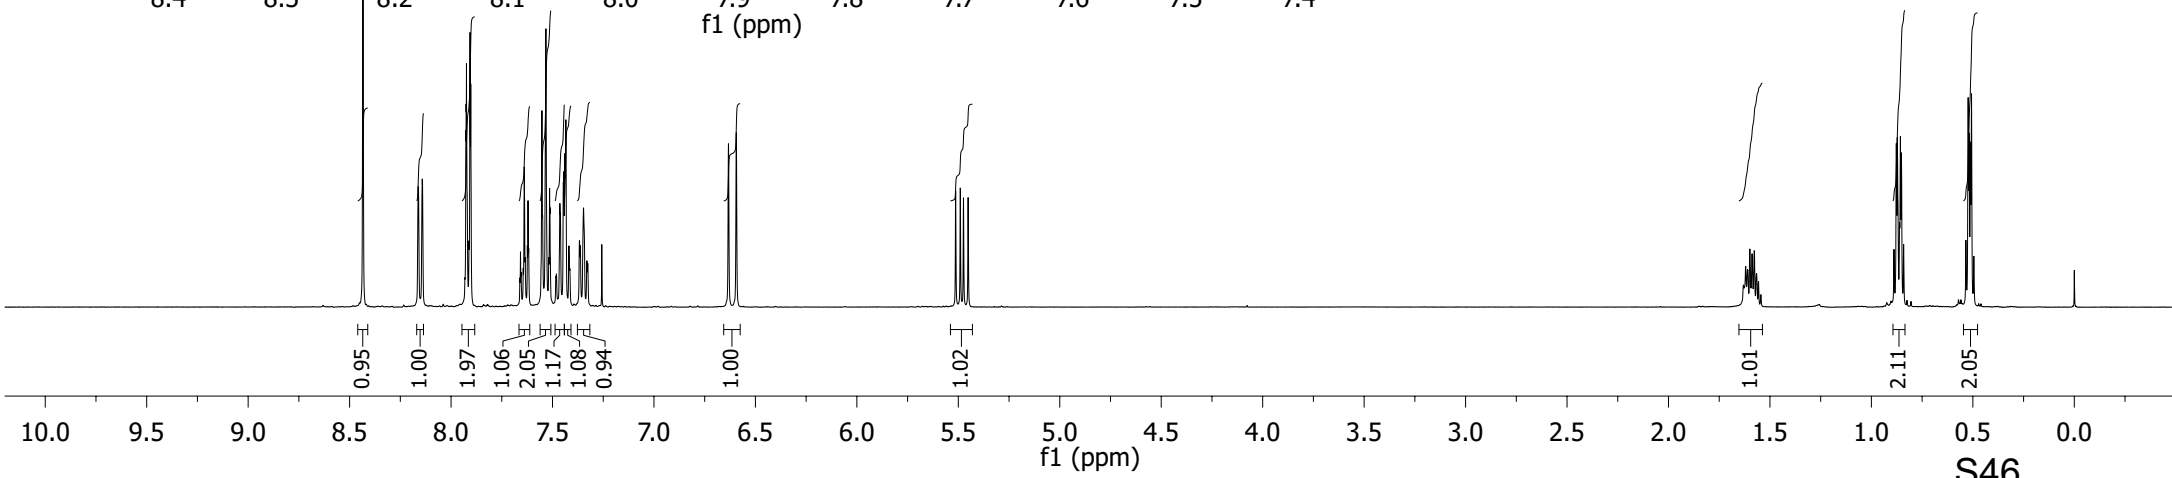

Solvent  $\text{CDCl}_3$   
Spectrometer Frequency 100.66

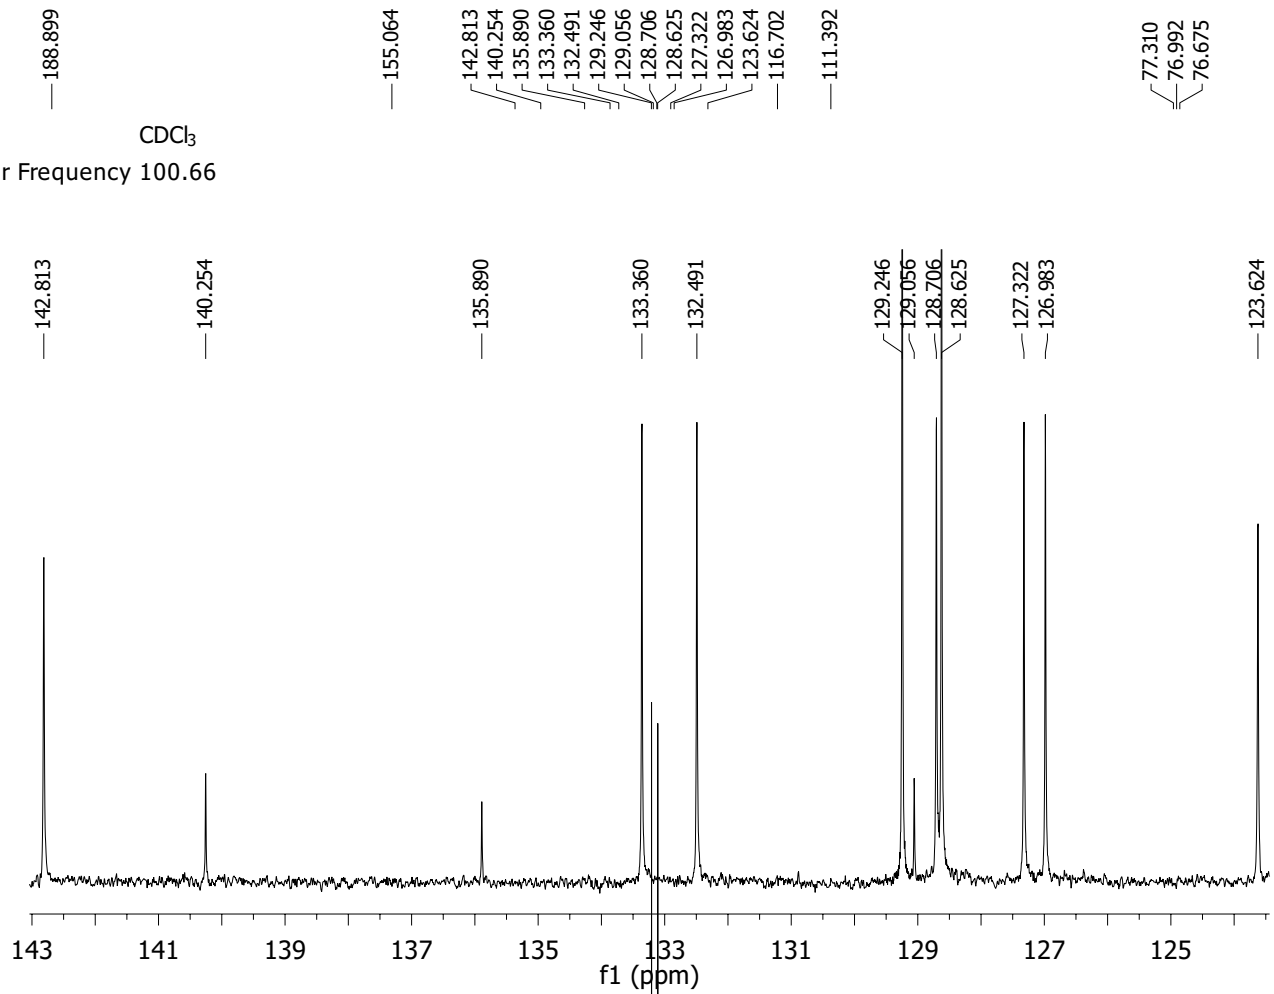

155.064  
142.813  
140.254  
135.890  
133.360  
132.491  
129.246  
129.056  
128.706  
128.625  
127.322  
126.983  
123.624  
116.702  
111.392

77.310  
76.992  
76.675

15.221

7.815

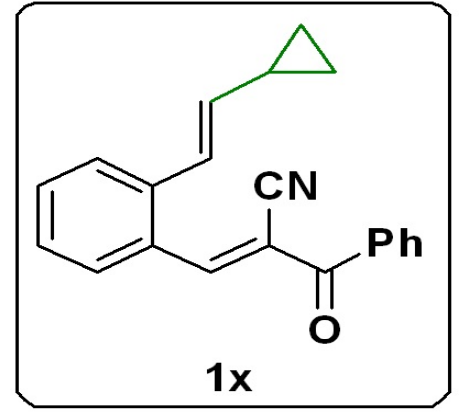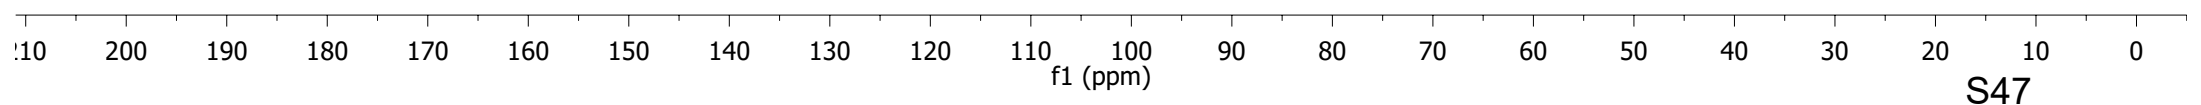

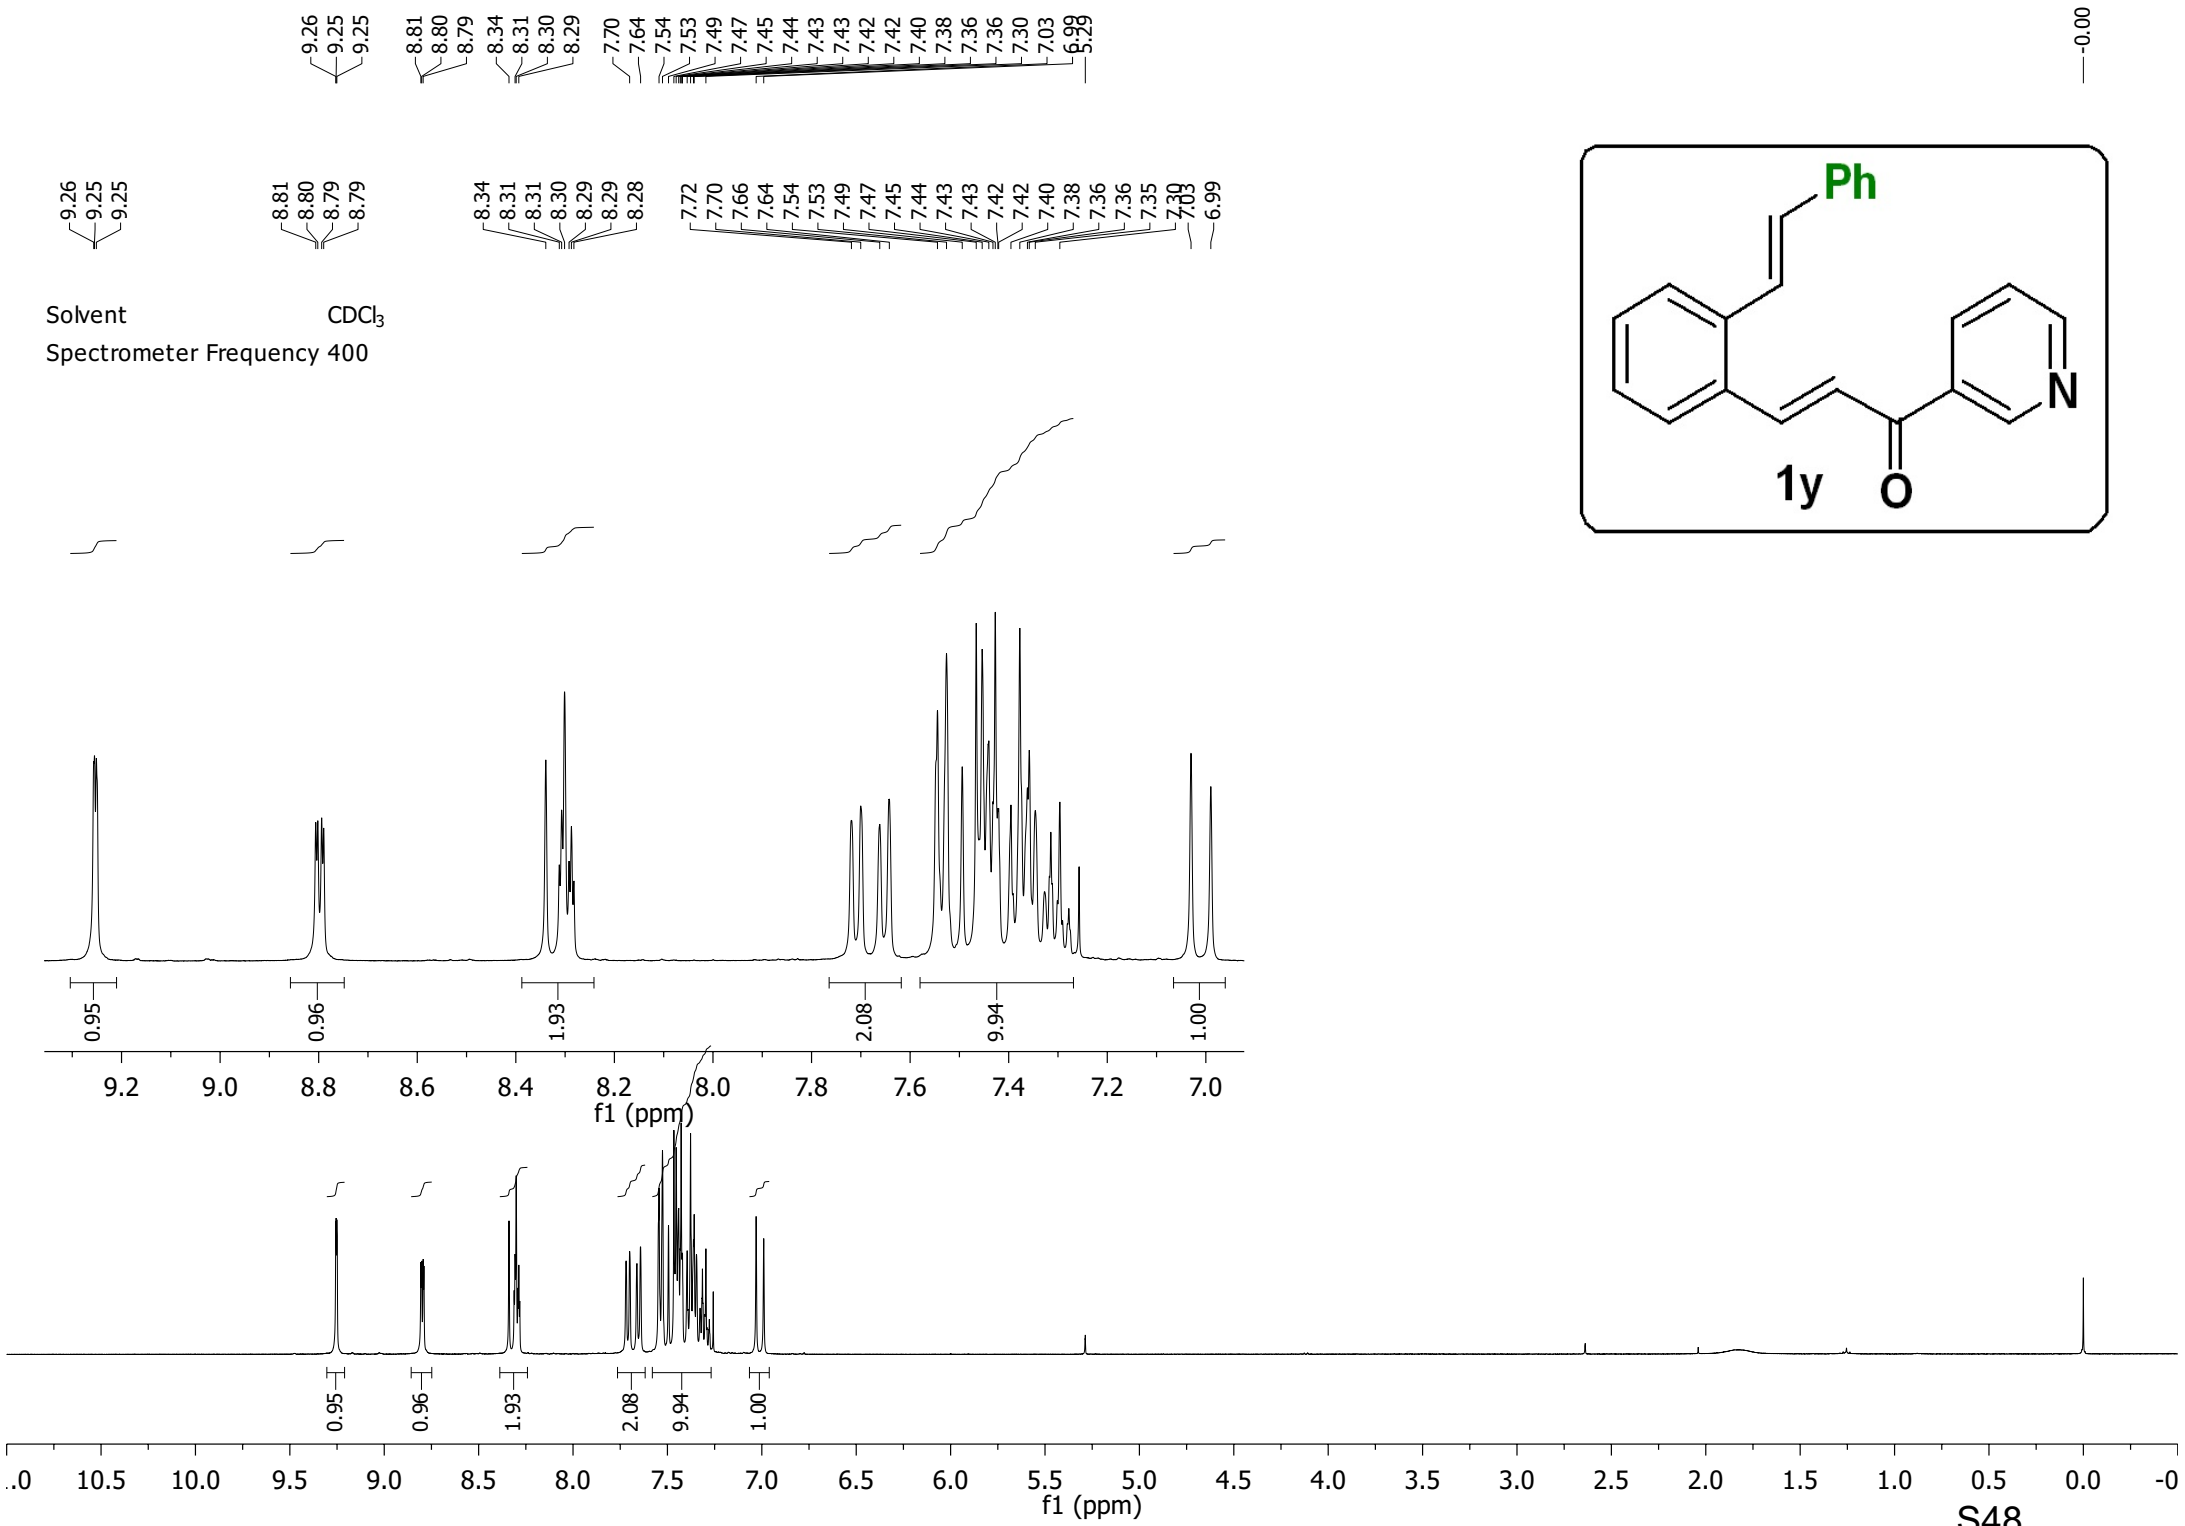



Solvent  $\text{CDCl}_3$   
Spectrometer Frequency 100

153.19  
149.76  
143.60  
138.39  
136.86  
135.84  
133.36  
133.07  
132.83  
130.68  
128.73  
128.17  
127.78  
127.39  
127.15  
126.77  
125.27  
123.61  
123.22

77.31  
76.99  
76.67

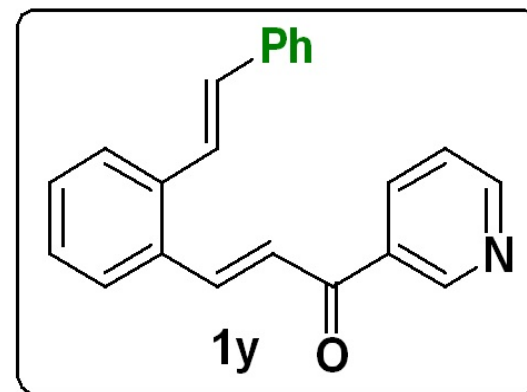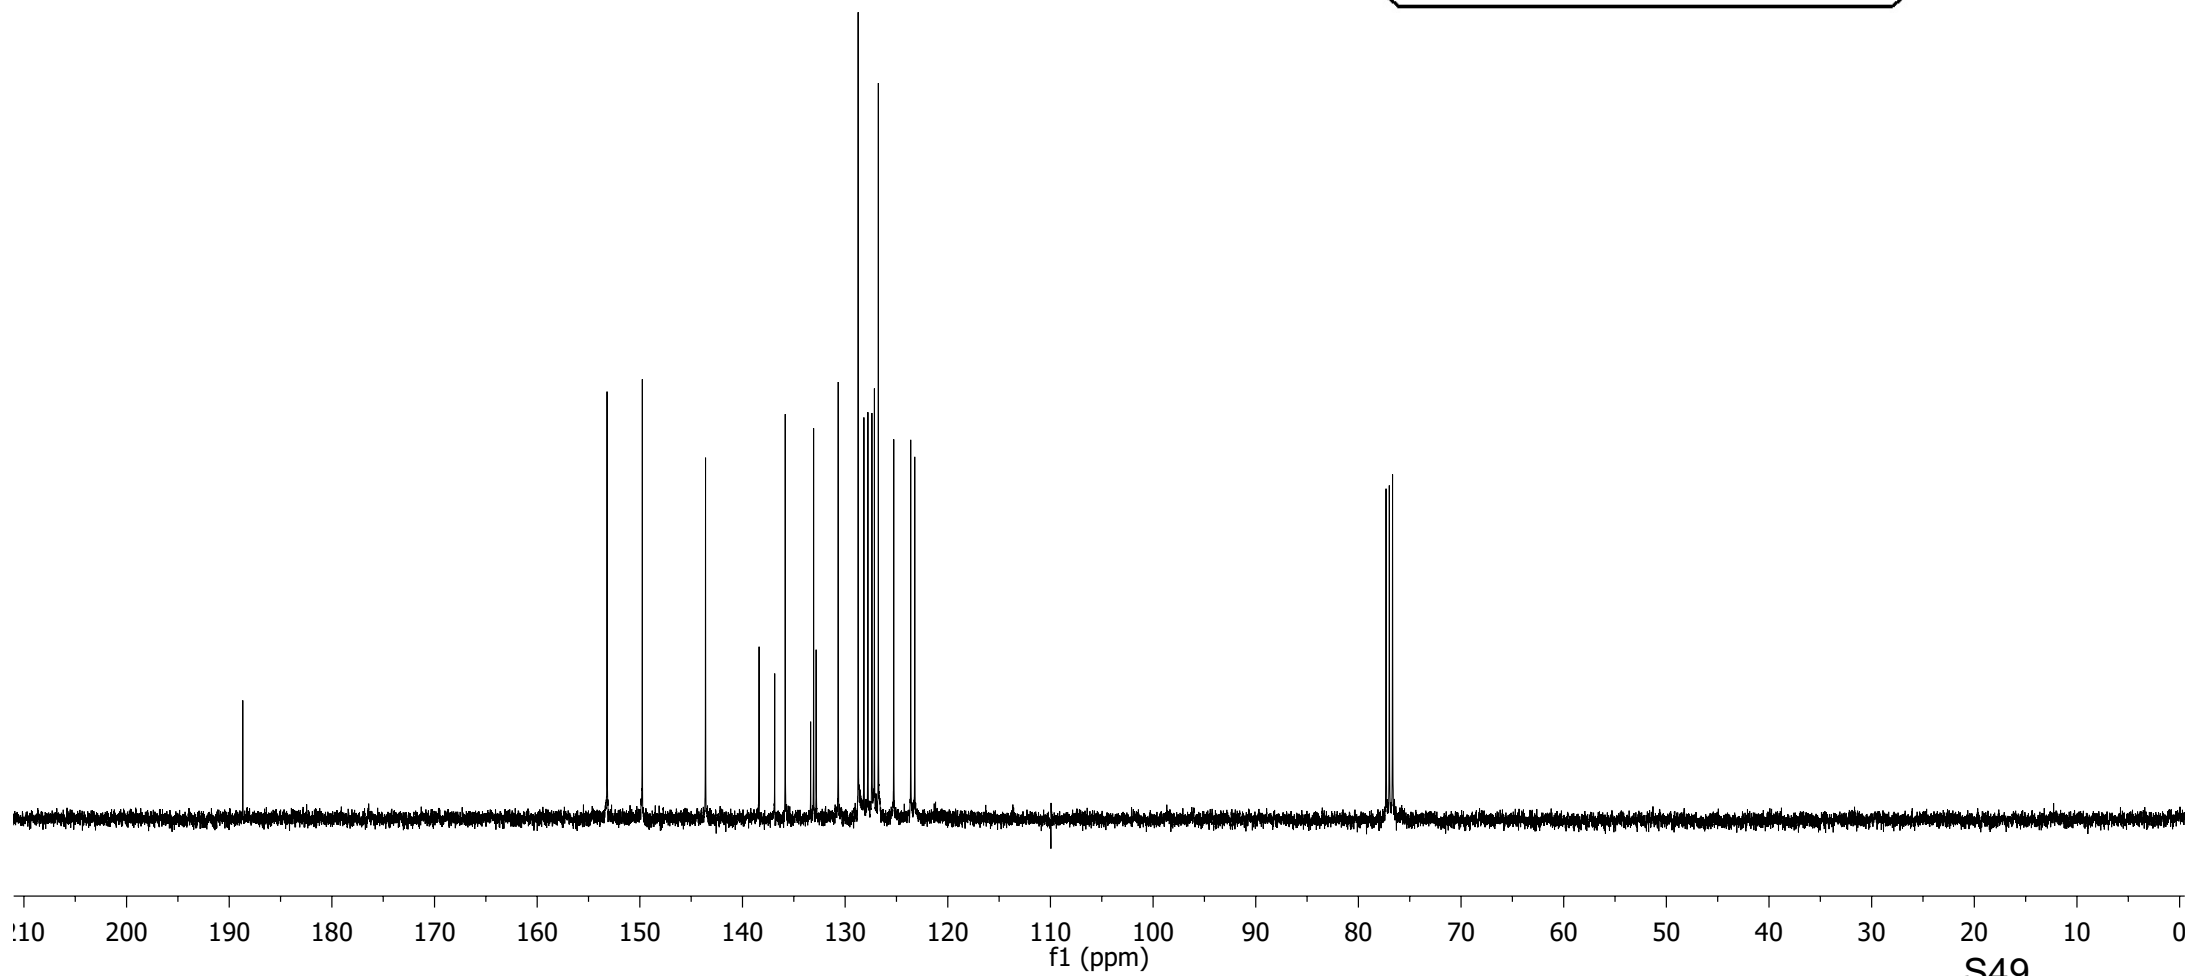

Solvent  $\text{CDCl}_3$   
Spectrometer Frequency 400

8.36  
7.87  
7.87  
7.85  
7.85  
7.57  
7.57  
7.55  
7.54  
7.52  
7.49  
7.42  
7.40  
7.40  
7.39  
7.38  
7.36  
7.35  
7.34  
7.32  
7.26  
7.24  
7.21  
7.19  
7.03  
7.01  
6.97  
6.96  
4.26  
4.25  
4.23

1.57  
1.21  
1.19  
1.17

-0.00

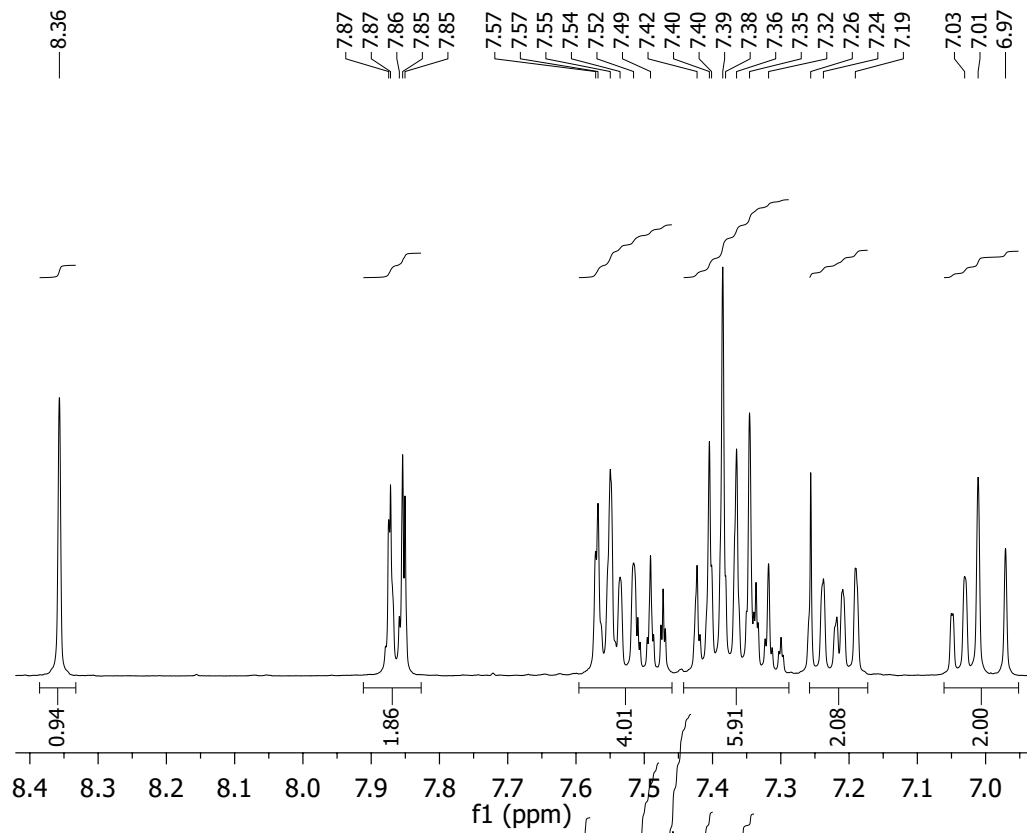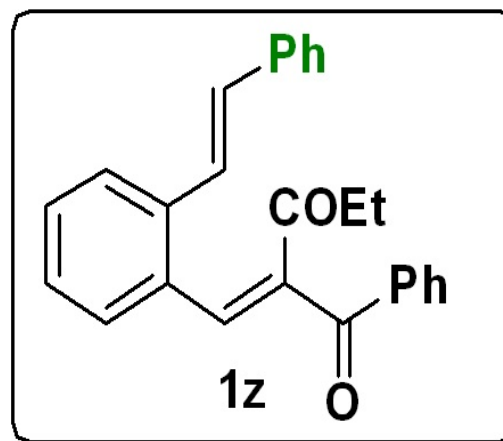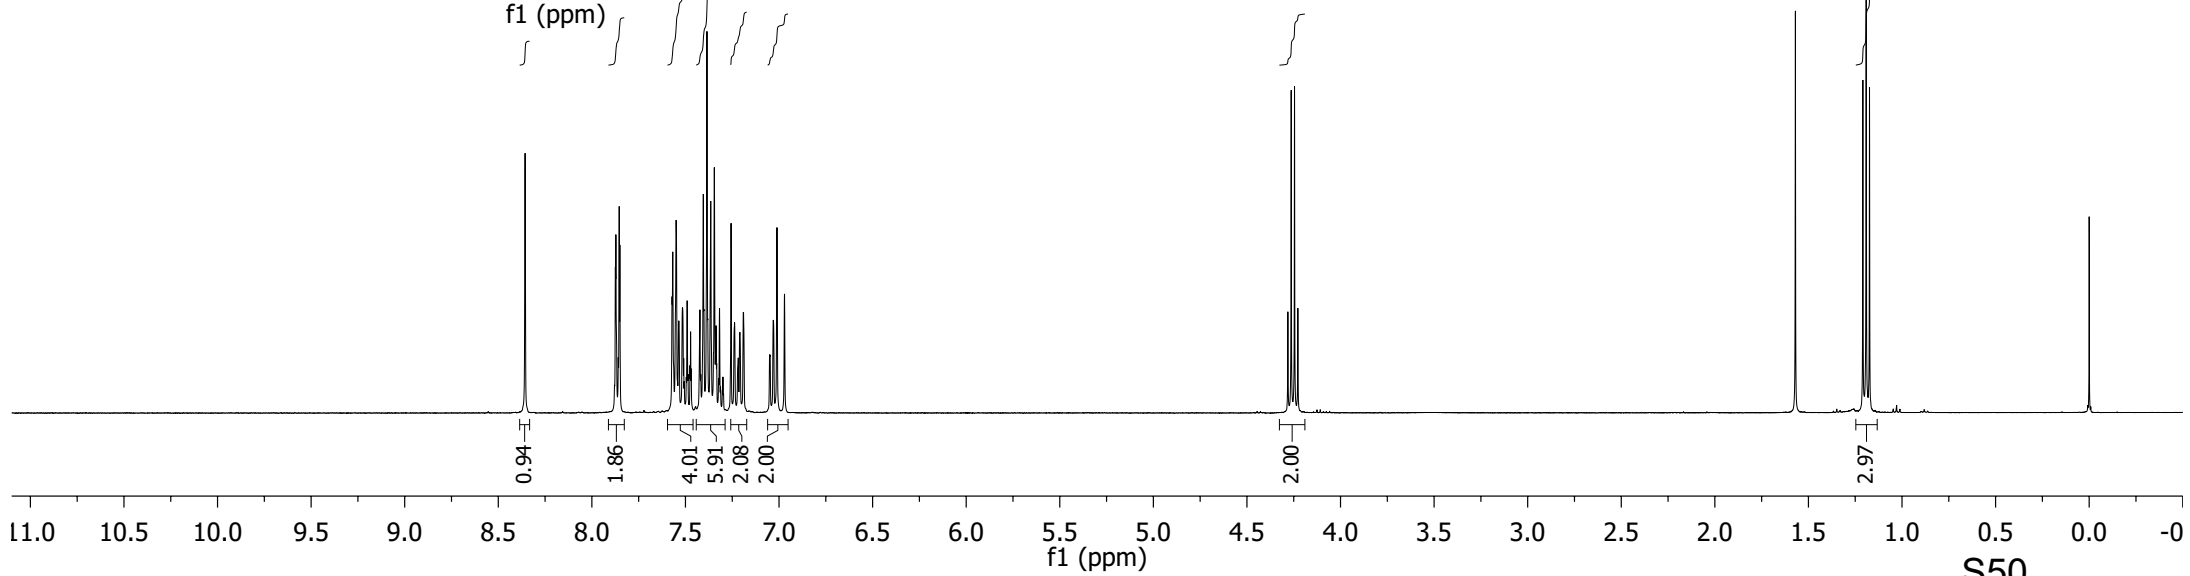

Solvent  $\text{CDCl}_3$   
Spectrometer Frequency 100

—194.76

—164.84

141.80  
137.42  
136.99  
136.45  
133.57  
133.20  
132.82  
131.58  
129.96  
129.32  
129.04  
128.76  
128.58  
128.18  
127.45  
126.84  
126.46  
125.48

77.31  
76.99  
76.68

—61.57

—14.01

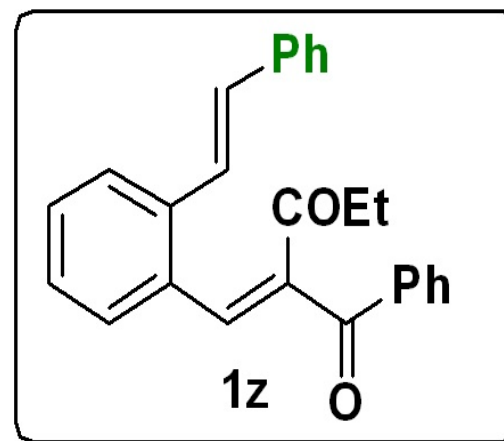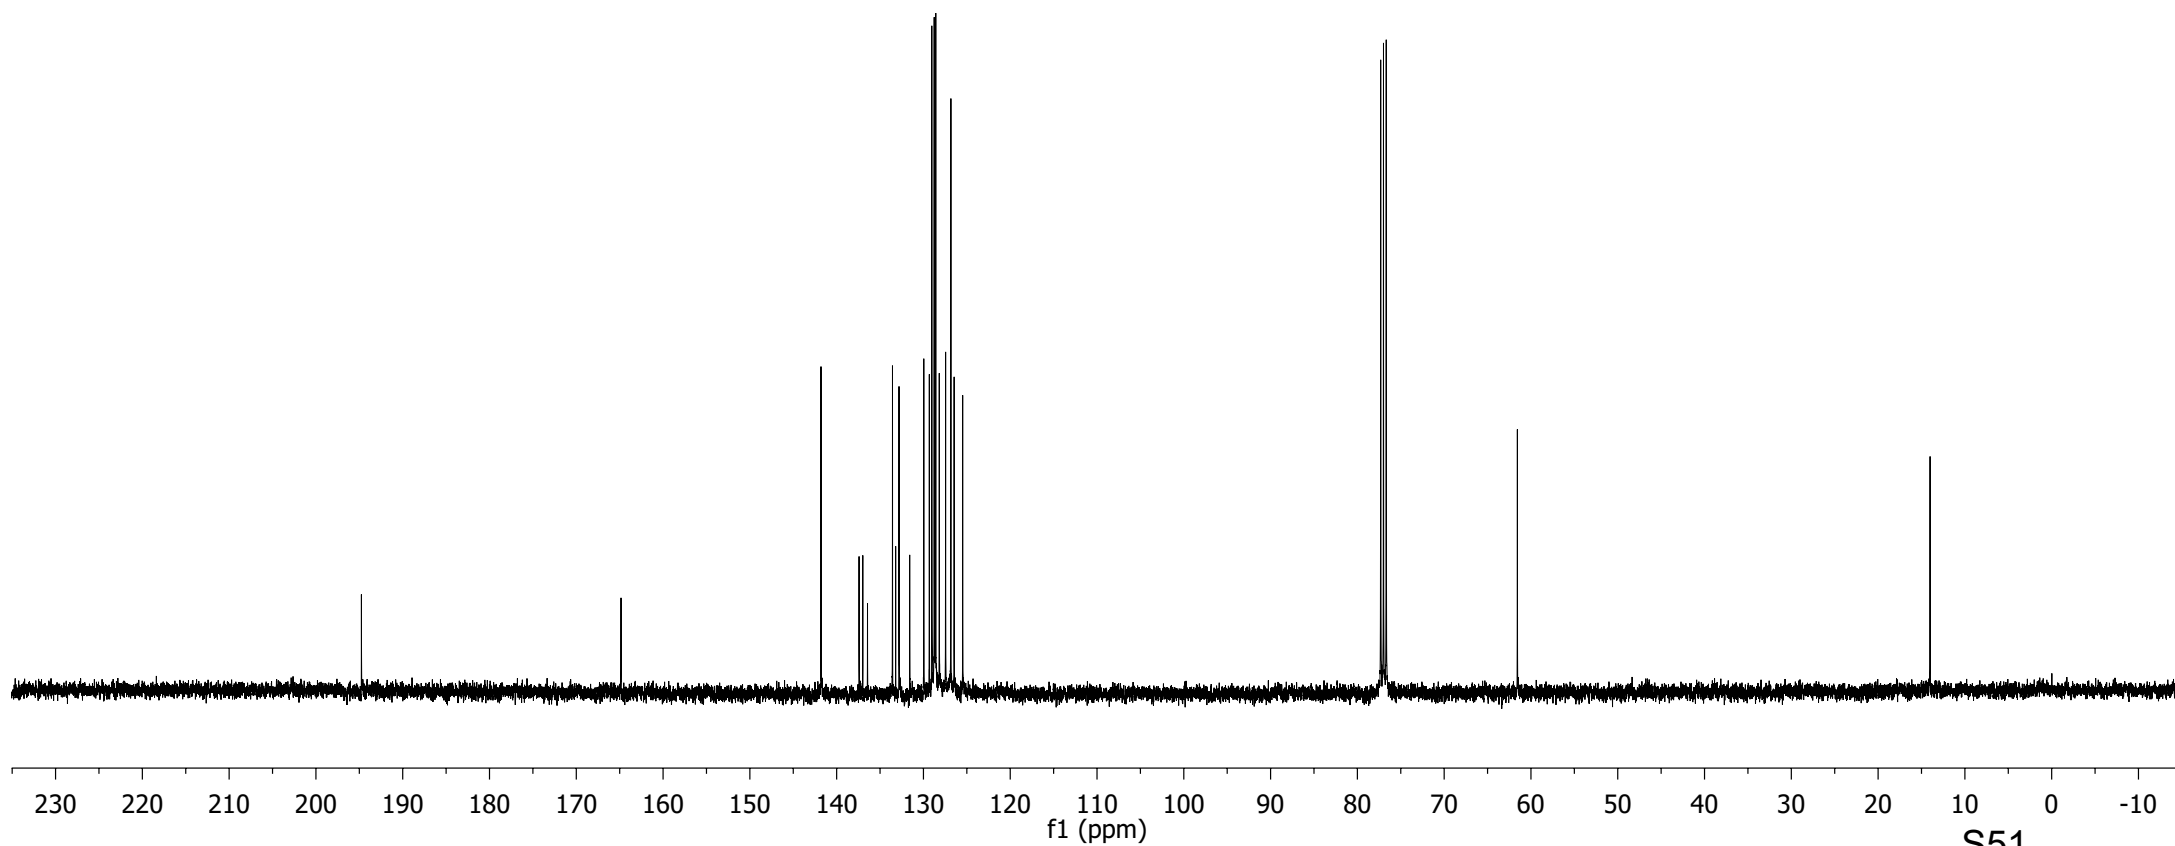

Solvent  $\text{CDCl}_3$   
Spectrometer Frequency 400

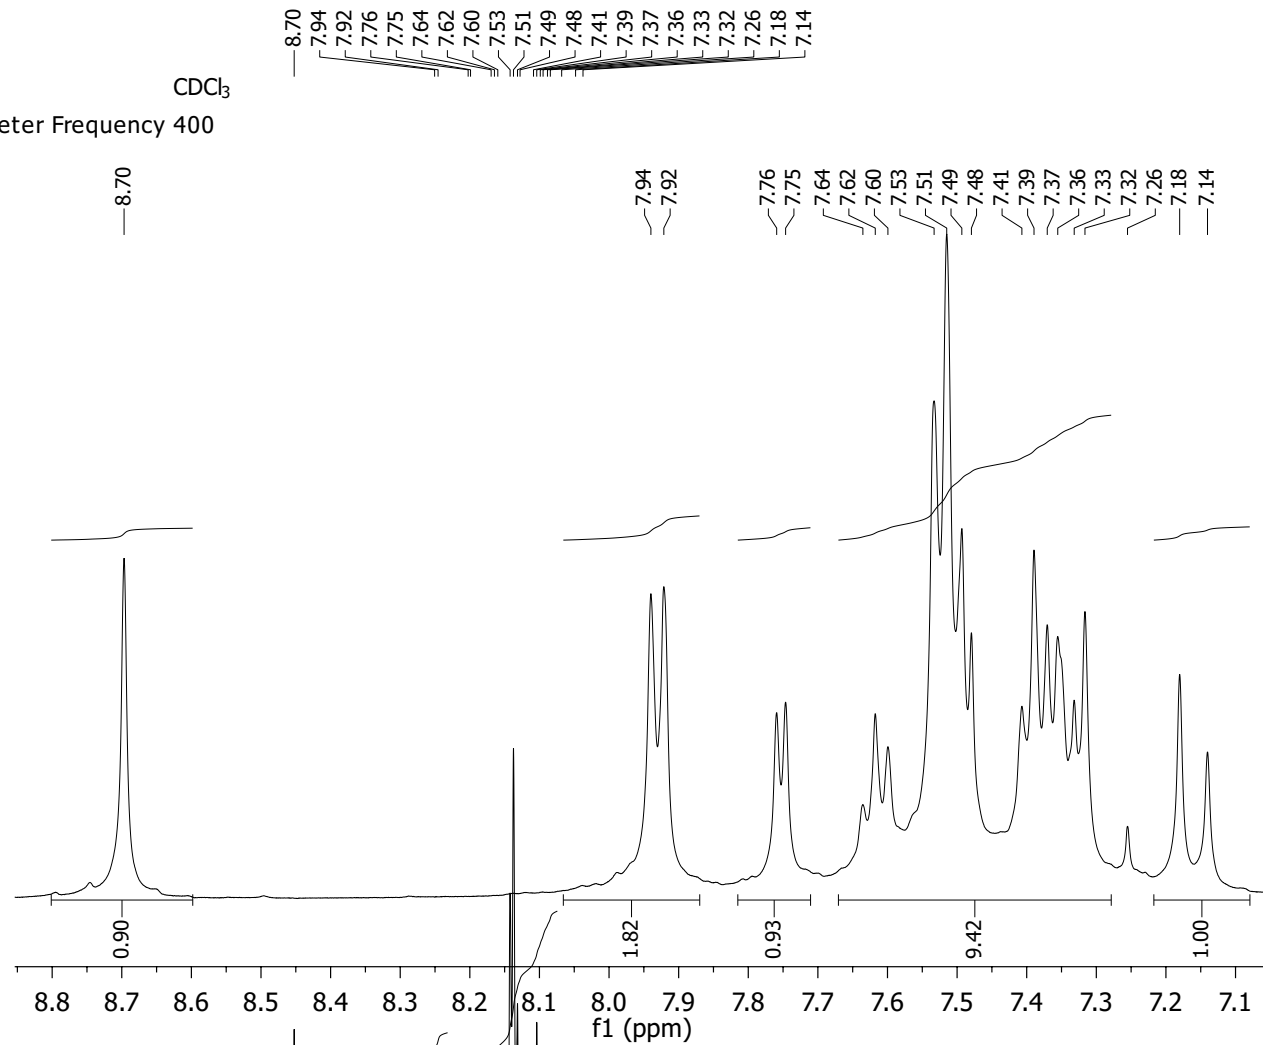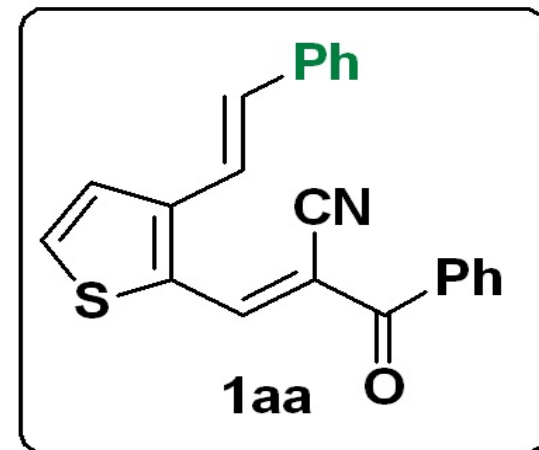

11.0 10.5 10.0 9.5 9.0 8.5 8.0 7.5 7.0 6.5 6.0 5.5 5.0 4.5 4.0 3.5 3.0 2.5 2.0 1.5 1.0 0.5 0.0 -0

f1 (ppm)

Solvent  $\text{CDCl}_3$   
Spectrometer Frequency 100

— 149.37

— 188.32

— 144.99

— 136.38

— 136.03

— 134.96

— 134.48

— 133.09

— 131.54

— 129.03

— 129.00

— 128.88

— 128.50

— 127.02

— 126.27

— 104.58

— 118.97

— 117.97

— 77.31

— 76.99

— 76.68

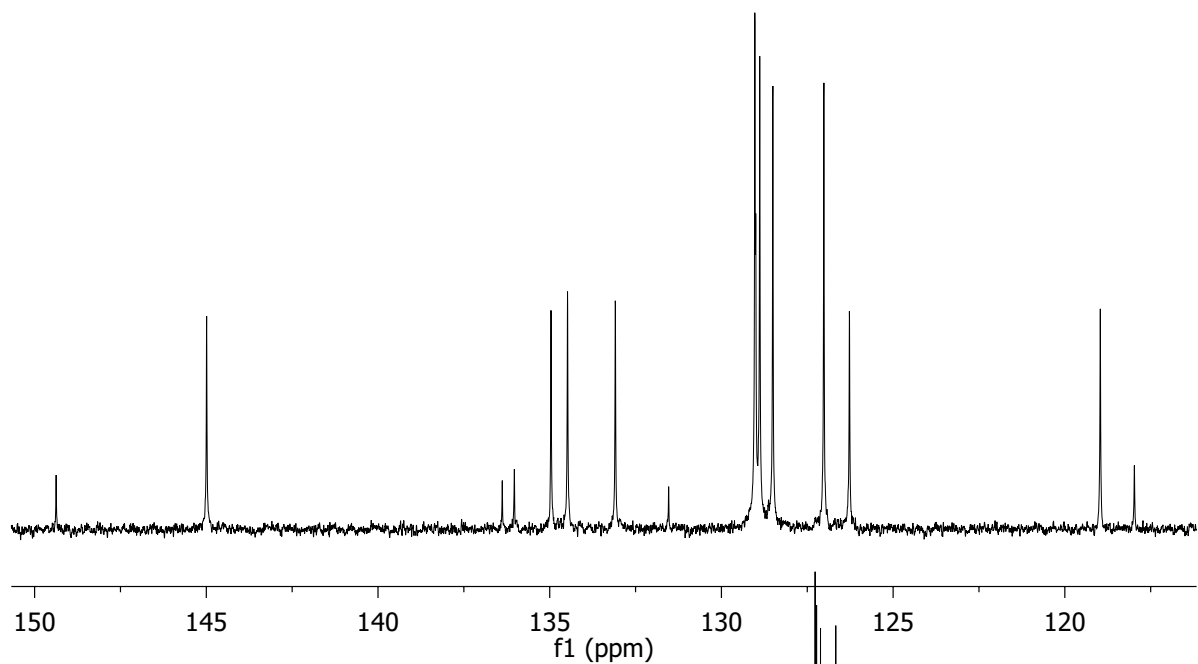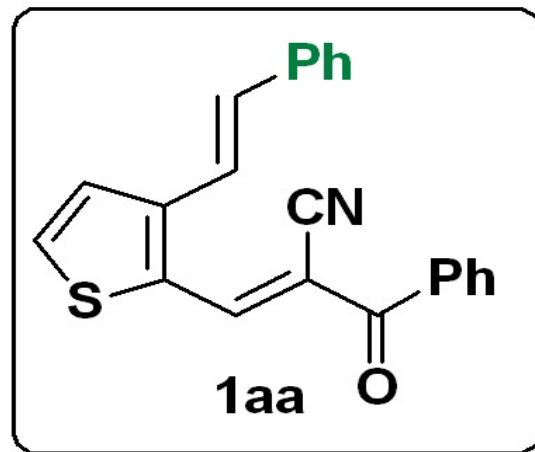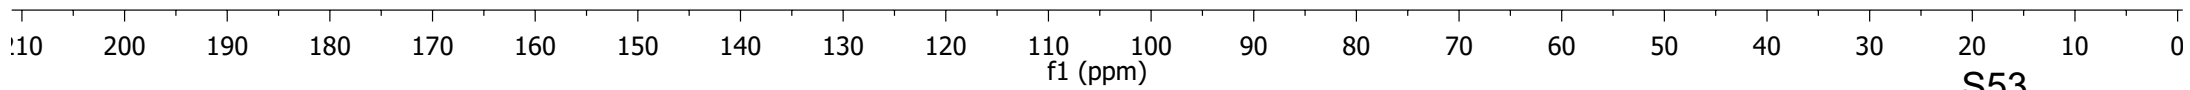

U0009  
TPG-463

2.90  
2.88  
2.76  
2.74  
2.72  
2.70  
2.58  
2.56  
1.65  
1.36  
1.28  
1.26  
1.22  
1.21  
1.19  
1.16  
1.06  
1.04  
0.00

Solvent  $\text{CDCl}_3$   
Spectrometer Frequency 400.28

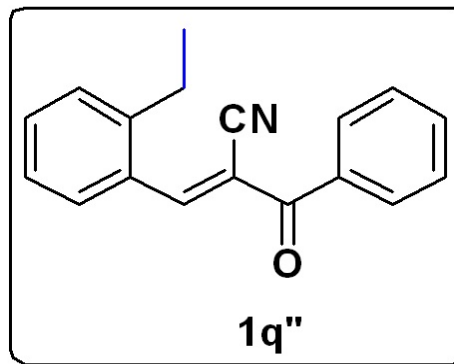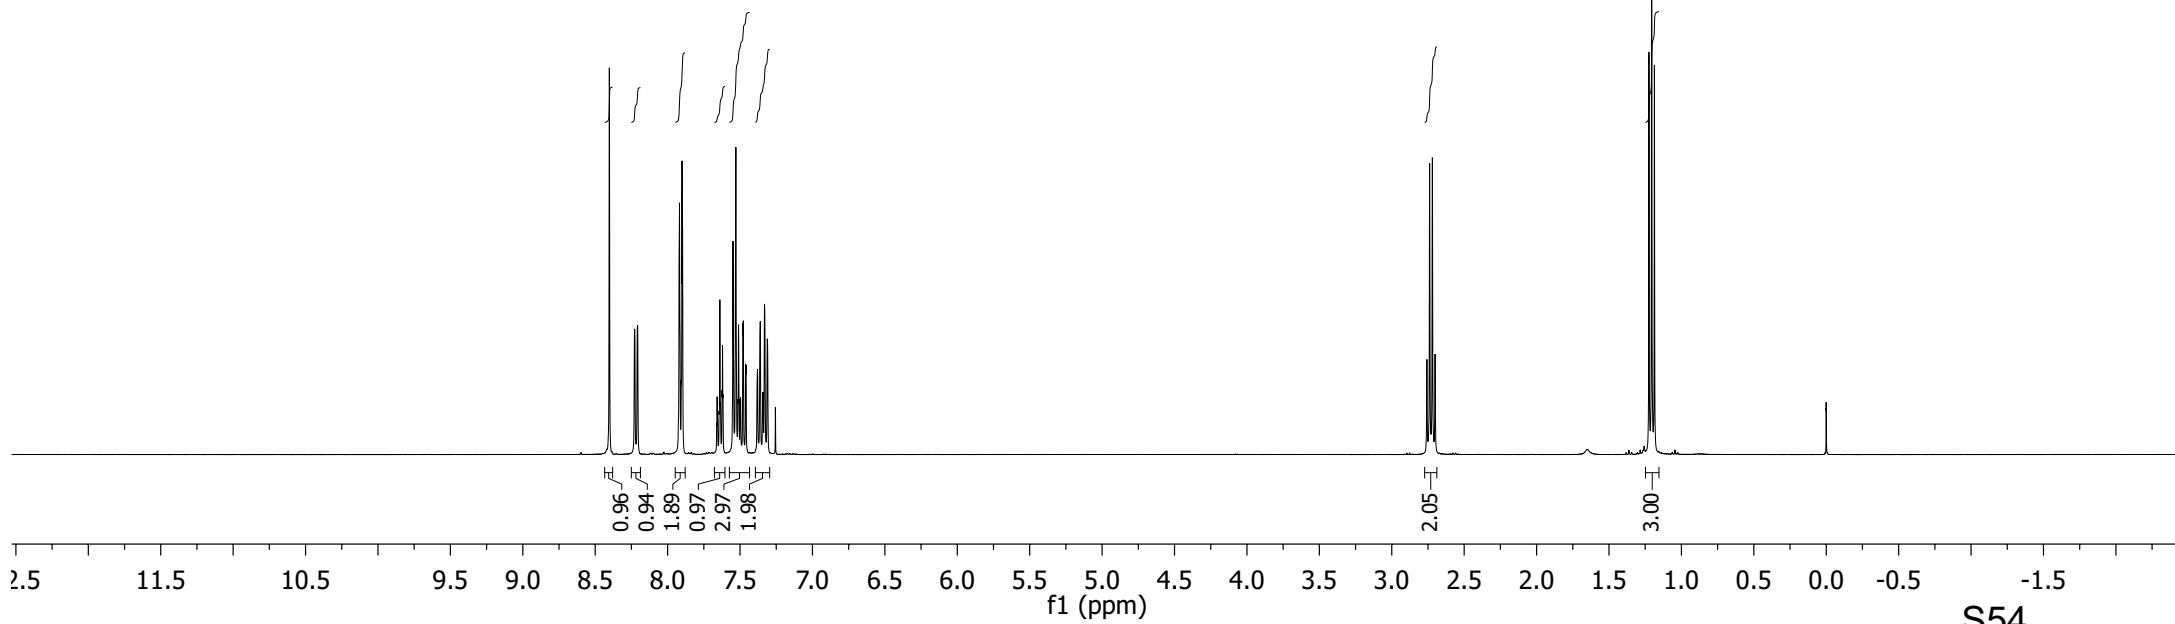

U0362-4  
TPG-463

—188.90

Solvent

CDCl<sub>3</sub>

Spectrometer Frequency 100.66

—153.91

—145.79

—135.74

—133.41

—132.92

—130.09

—129.40

—129.22

—128.68

—128.61

—126.67

—116.63

—111.79

—77.31

—77.00

—76.68

—26.64

—15.81

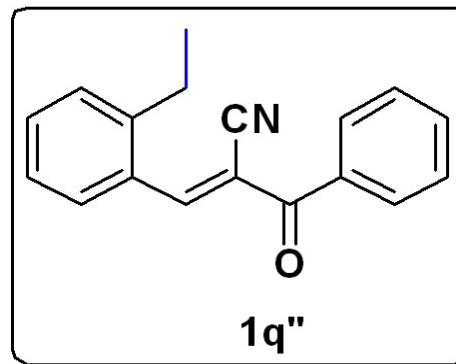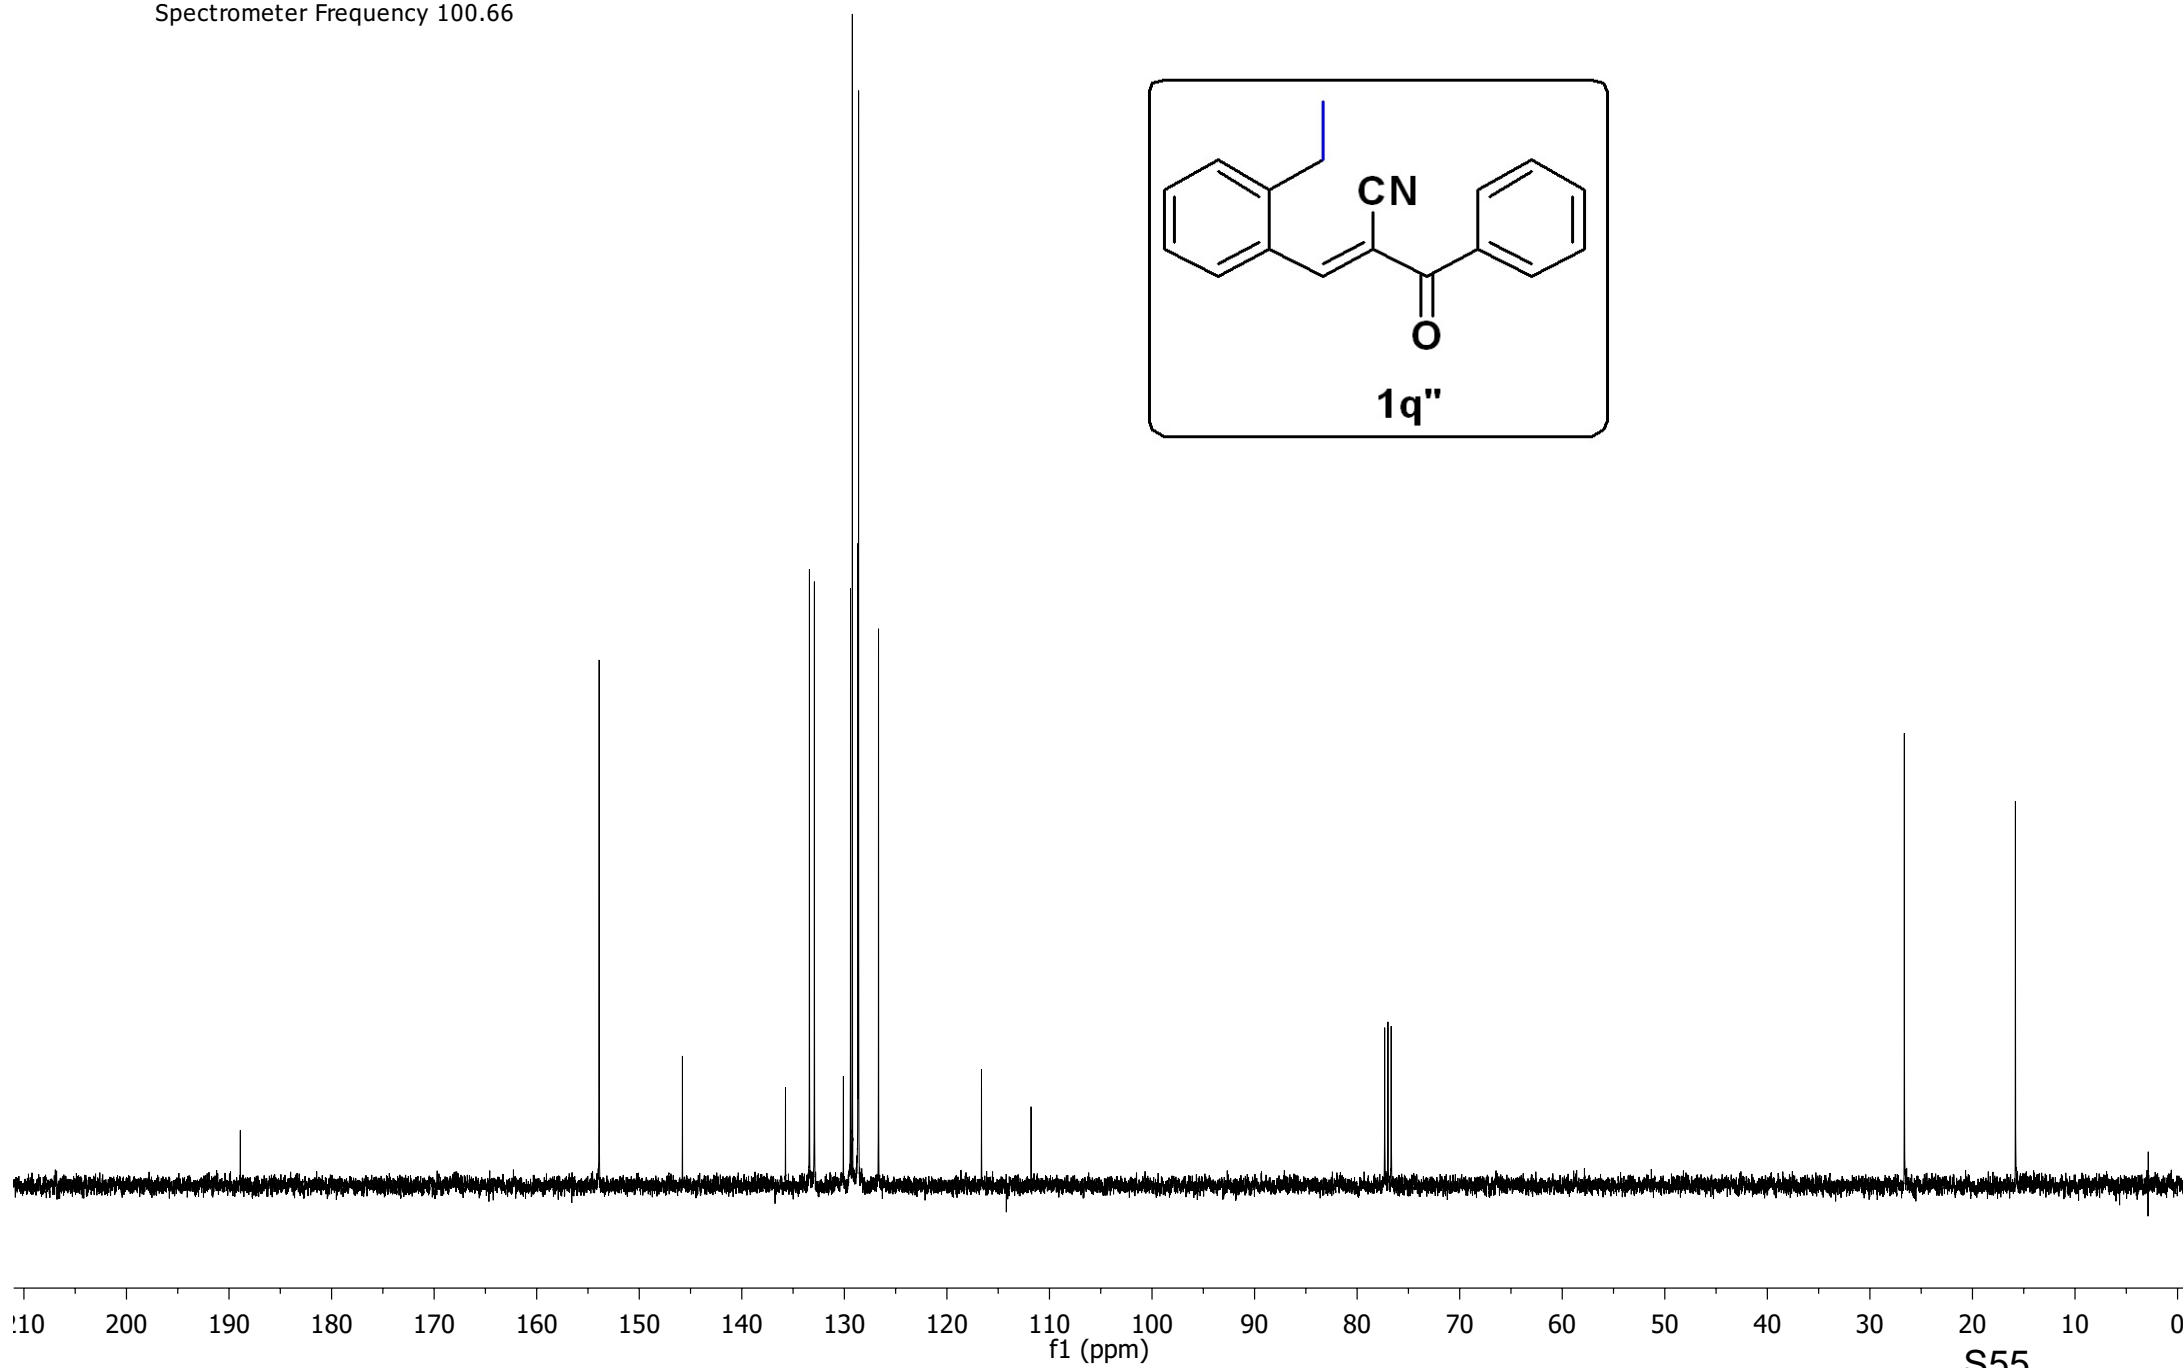

M025719  
 TPG-363  
 7.457, 7.451, 7.443, 7.43, 7.40, 7.39, 7.38, 7.37, 7.36, 7.33, 7.33, 7.31, 7.31, 7.31, 7.30, 7.28, 7.25, 7.18, 7.18, 7.06, 7.04, 7.04, 7.03, 7.03, 6.99, 6.99, 6.94, 6.94, 6.93, 6.92, 6.92, 6.92, 6.92, 6.84, 6.84, 6.83, 6.83, 5.30, 3.94, 3.93, 3.92, 3.92

2.91, 2.89, 2.58, 2.58, 2.57, 2.57, 2.56, 2.56, 2.55, 2.55, 1.54

-0.00

Solvent CDCl<sub>3</sub>  
 Spectrometer Frequency 400.40

M025719  
 TPG-363  
 7.457, 7.451, 7.443, 7.43, 7.40, 7.39, 7.38, 7.37, 7.36, 7.33, 7.33, 7.31, 7.31, 7.31, 7.30, 7.28, 7.25, 7.18, 7.18, 7.06, 7.04, 7.04, 7.03, 7.03, 6.99, 6.99, 6.94, 6.94, 6.93, 6.92, 6.92, 6.92, 6.92, 6.84, 6.84, 6.83, 6.83, 6.82, 6.82, 6.82, 6.82

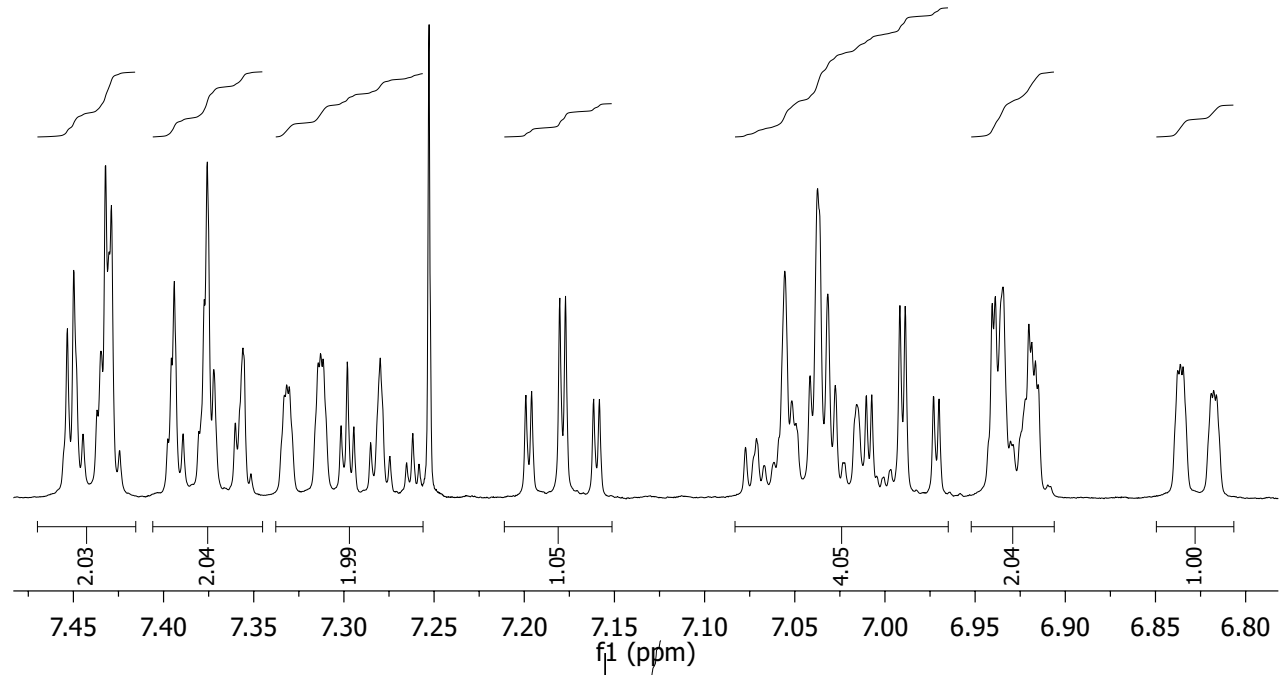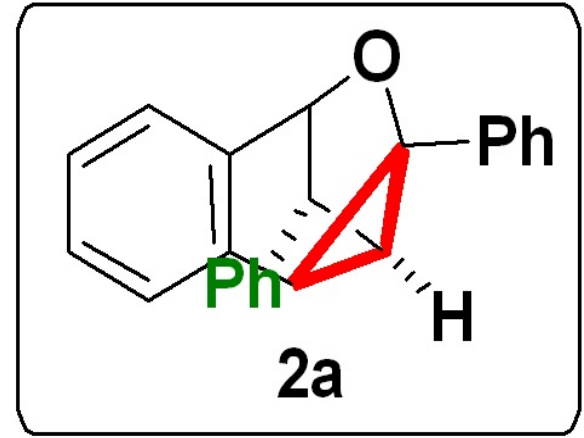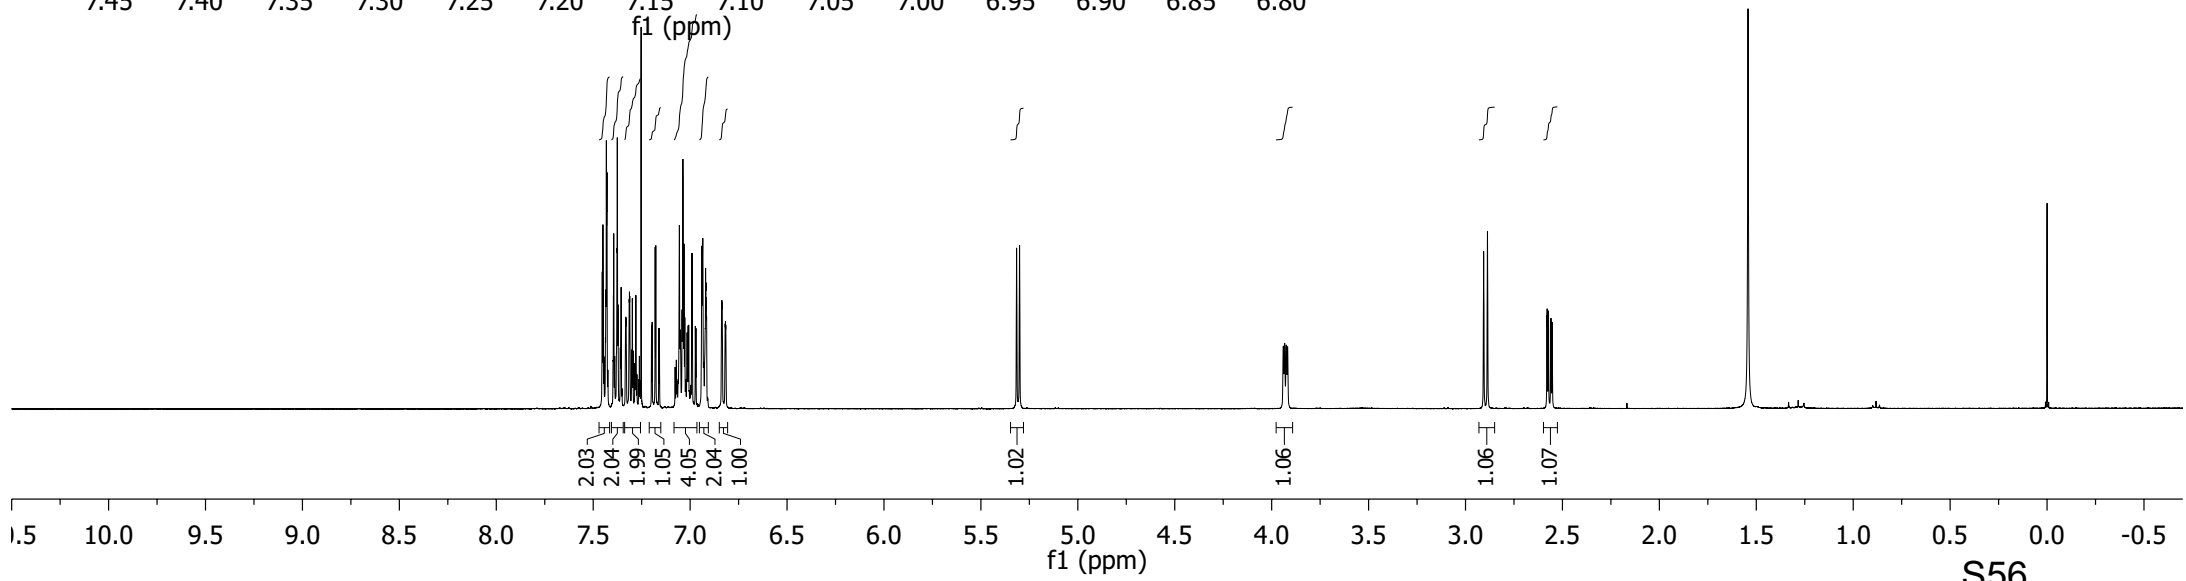



M0257-14  
TPG-363 Solvent  $\text{CDCl}_3$   
Spectrometer Frequency 100.69

137.91  
136.50  
133.02  
131.97  
128.36  
127.88  
127.80  
127.68  
126.93  
126.37  
125.88  
125.04  
124.93  
124.24  
110.46

79.01  
77.31  
76.99  
76.67

65.53

43.31

27.67  
25.30

M0257-14  
TPG-363 136.50  
133.02  
131.97  
128.36  
127.88  
127.80  
127.68  
126.93  
126.37  
125.88  
125.04  
124.93  
124.24

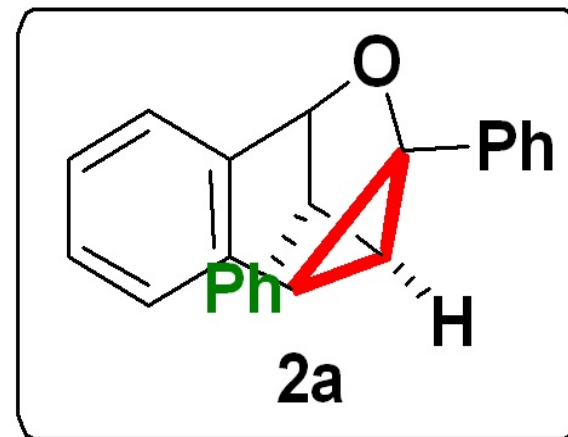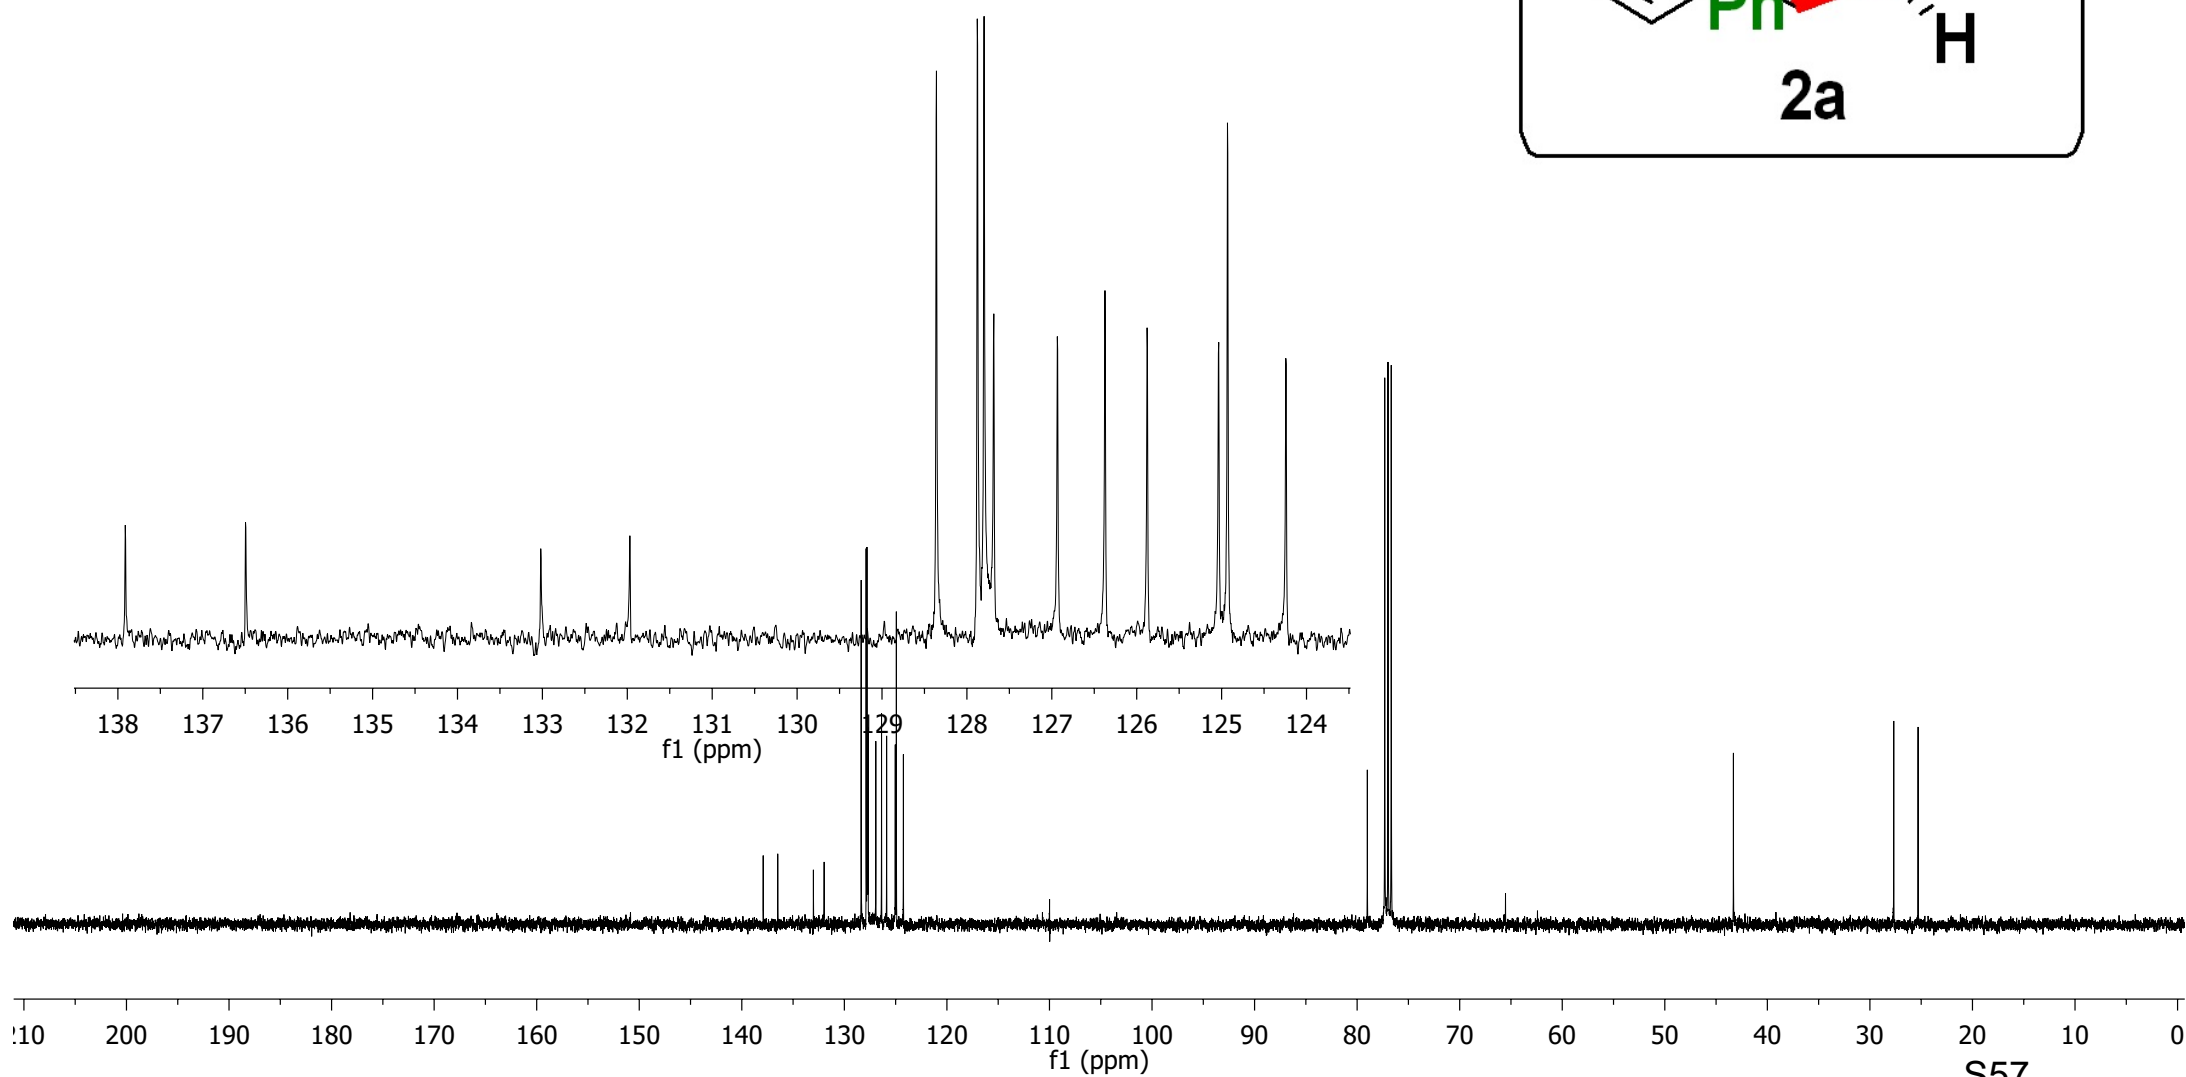

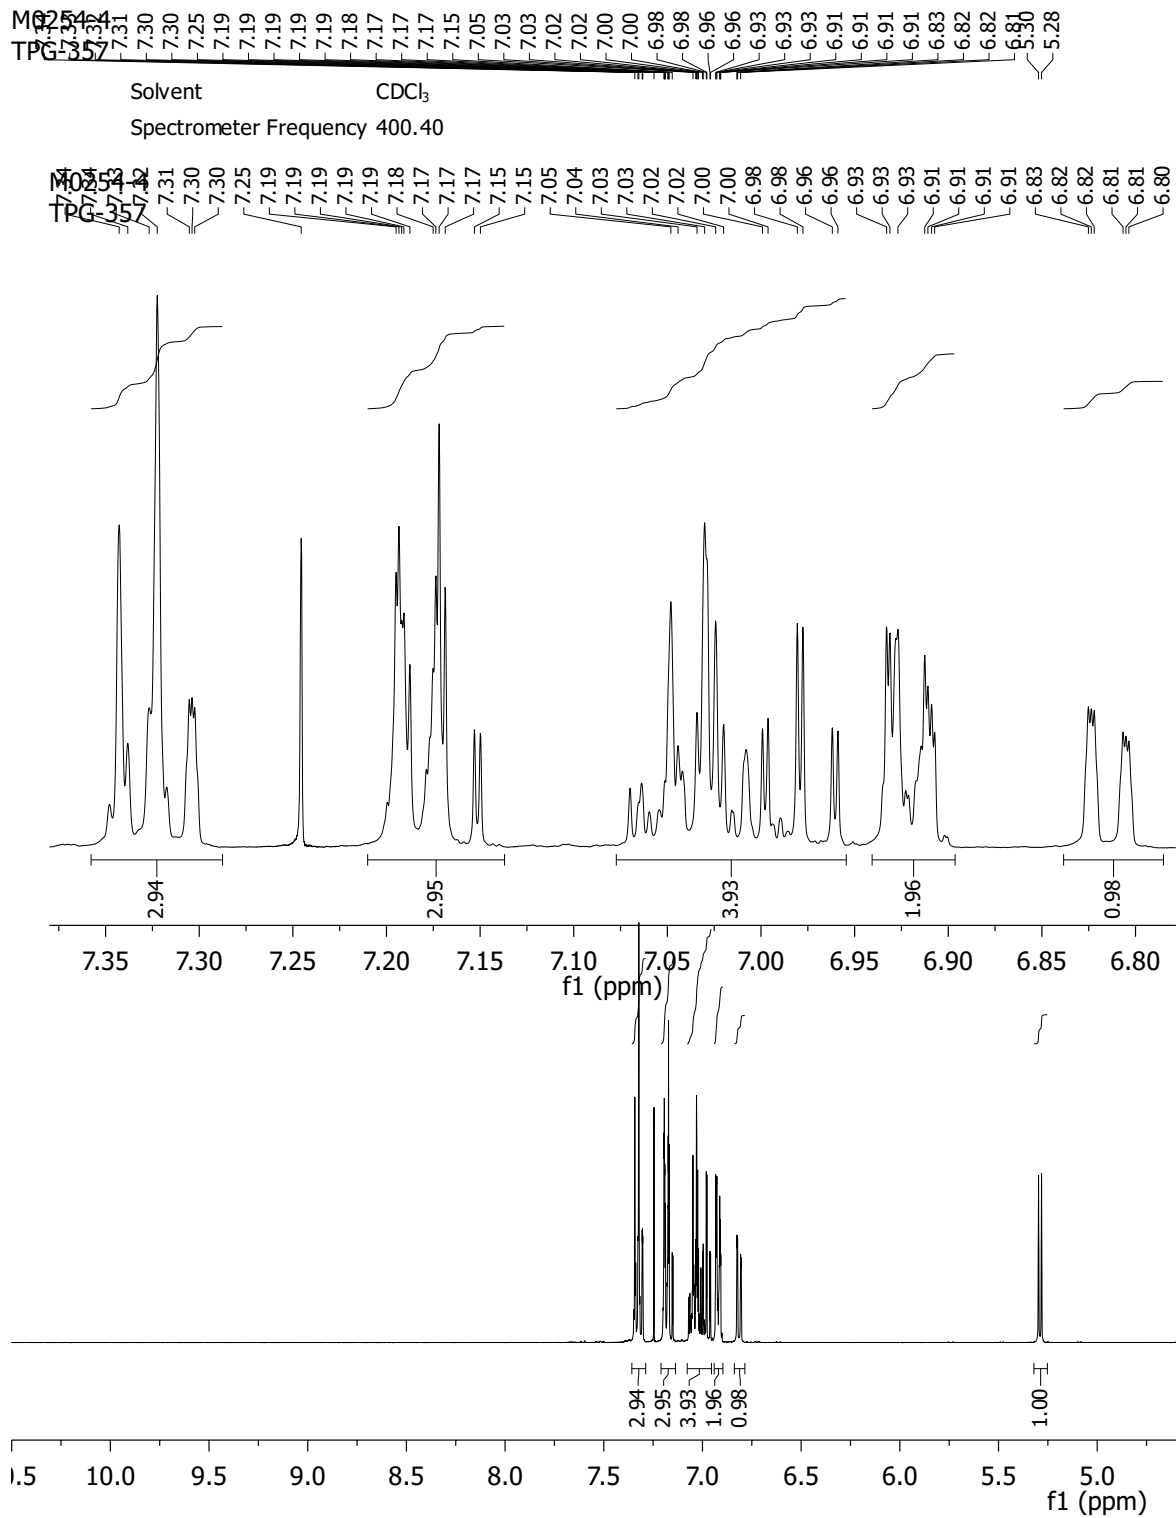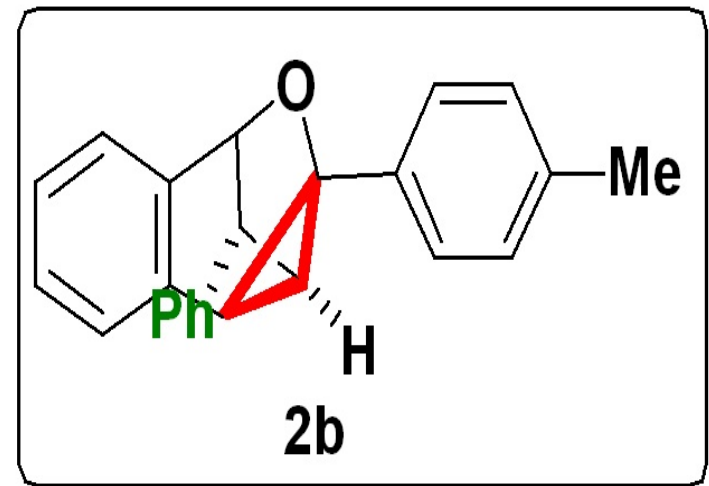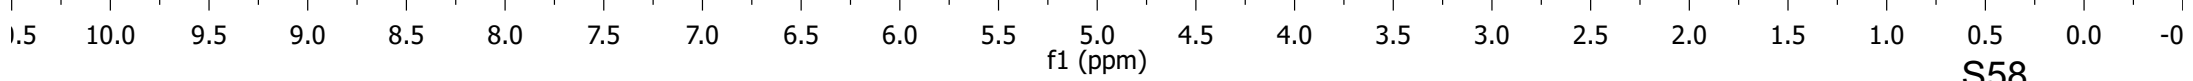

M0254-5  
TPG-357

Solvent  $\text{CDCl}_3$   
Spectrometer Frequency 400.40

136.69  
136.59  
134.72  
133.15  
131.98  
129.04  
127.85  
127.80  
127.63  
126.33  
125.84  
125.05  
124.94  
124.22

78.99  
77.31  
76.99  
76.67

65.49

43.31

27.32  
25.06  
21.12

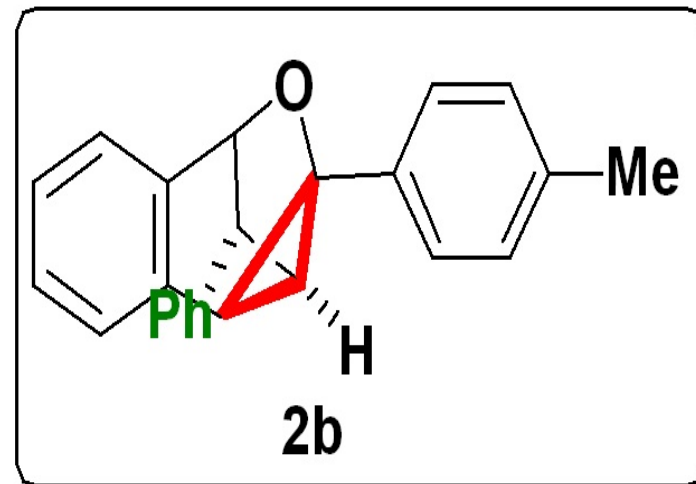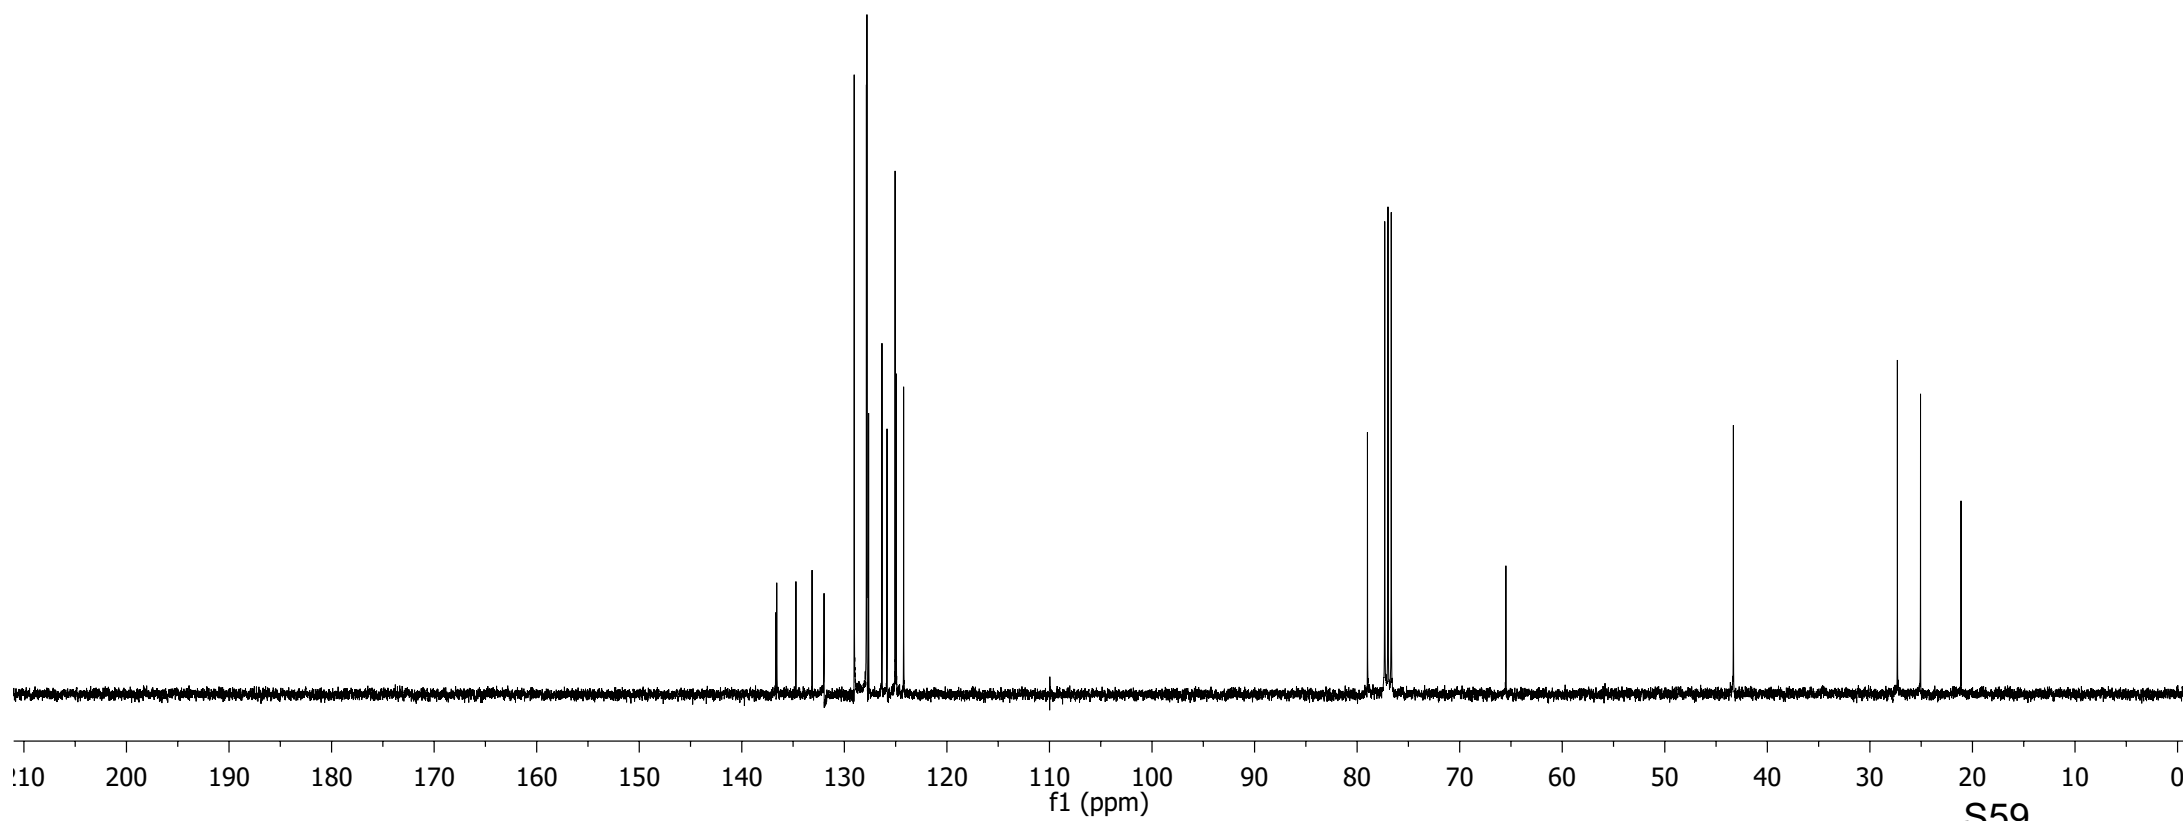

M0278  
TPG-367

Solvent CDCl<sub>3</sub>  
Spectrometer Frequency 400.40

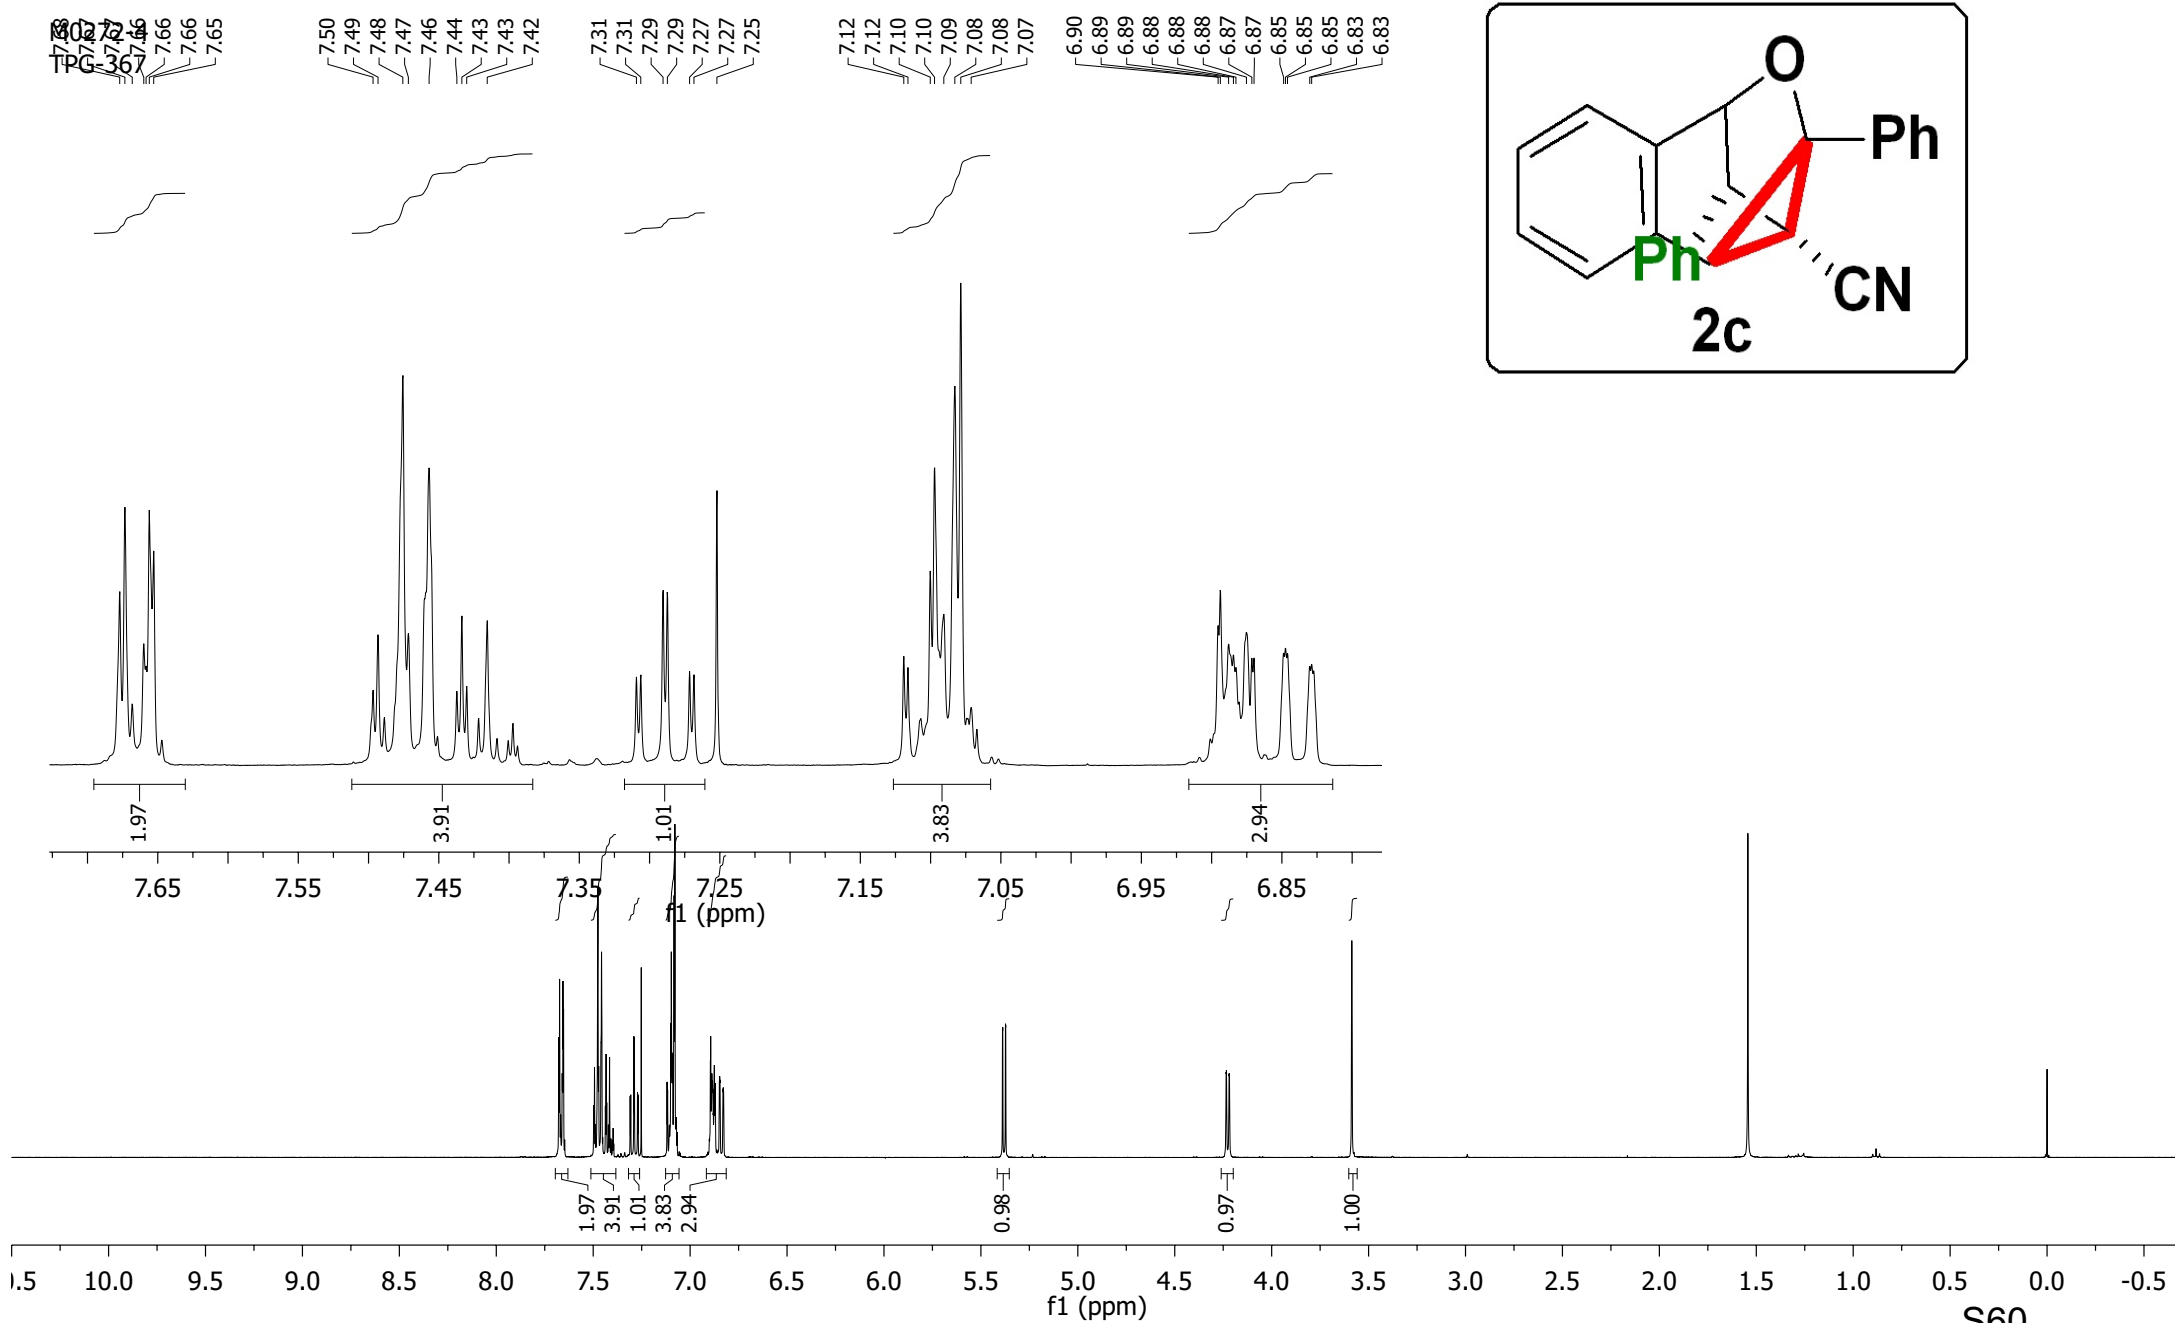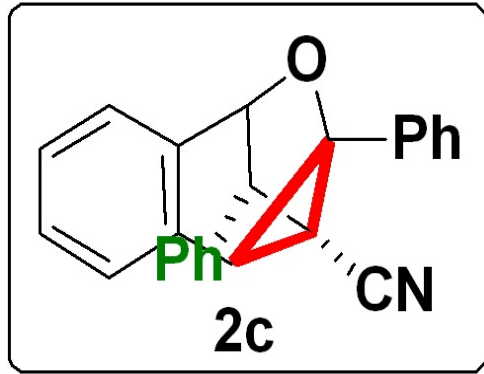

M0272-5  
TPG-367

M0272-5  
TPG-367  
—132.62  
—132.26  
—131.51

—129.36  
—128.94  
—128.72  
—128.66  
—128.37  
—127.45  
—127.34  
—127.00  
—126.46  
—126.35

—124.70

—118.50

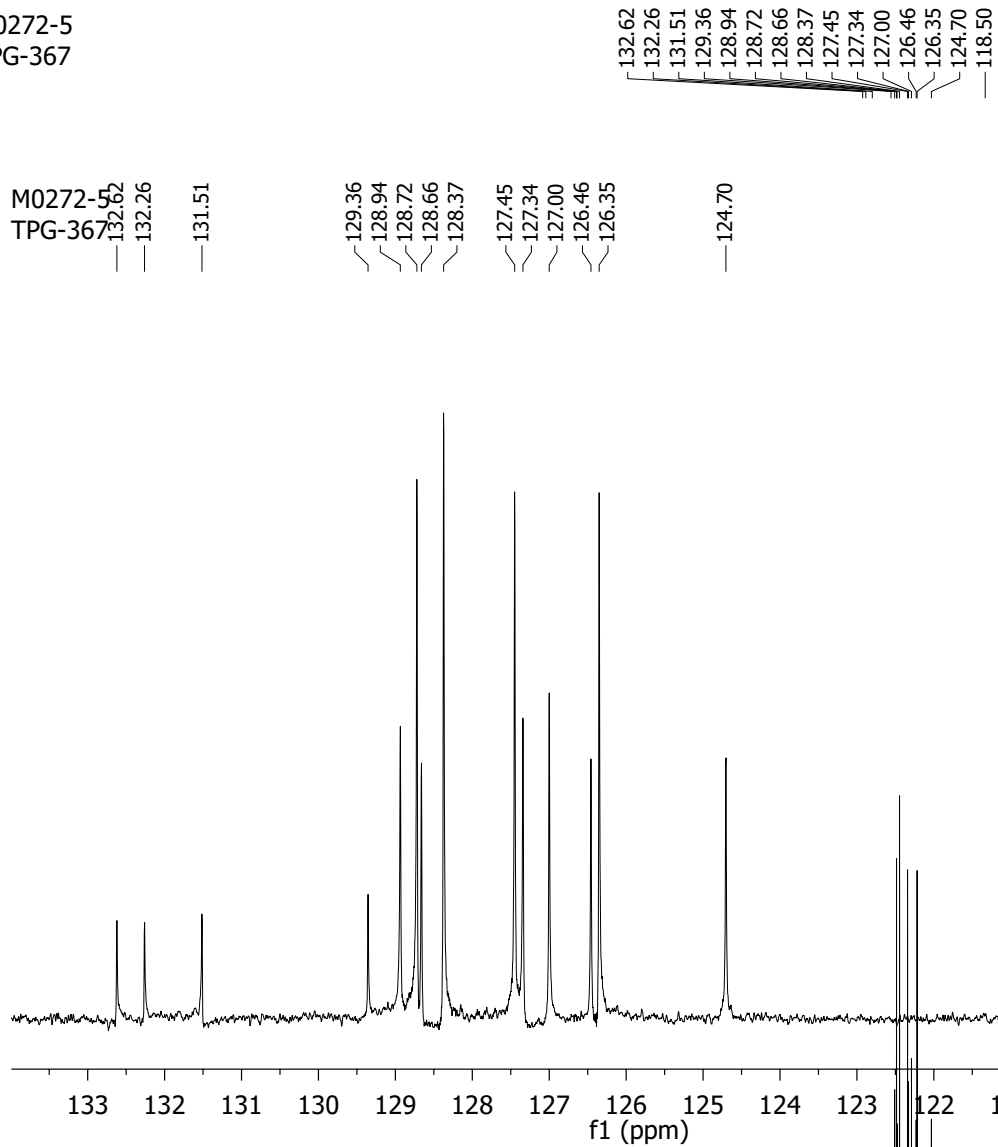

—79.12  
—77.31  
—76.99  
—76.67  
—69.46

—46.92

—31.03

—24.01

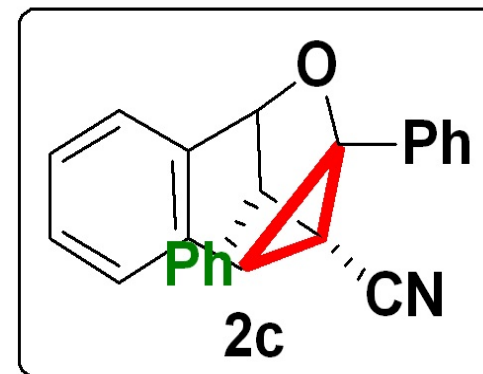

230 220 210 200 190 180 170 160 150 140 130 120 110 100 90 80 70 60 50 40 30 20 10 0 -10  
f1 (ppm)

S61

M0267-10  
TPG-370

Solvent

CDCl<sub>3</sub>

Spectrometer Frequency 400.40

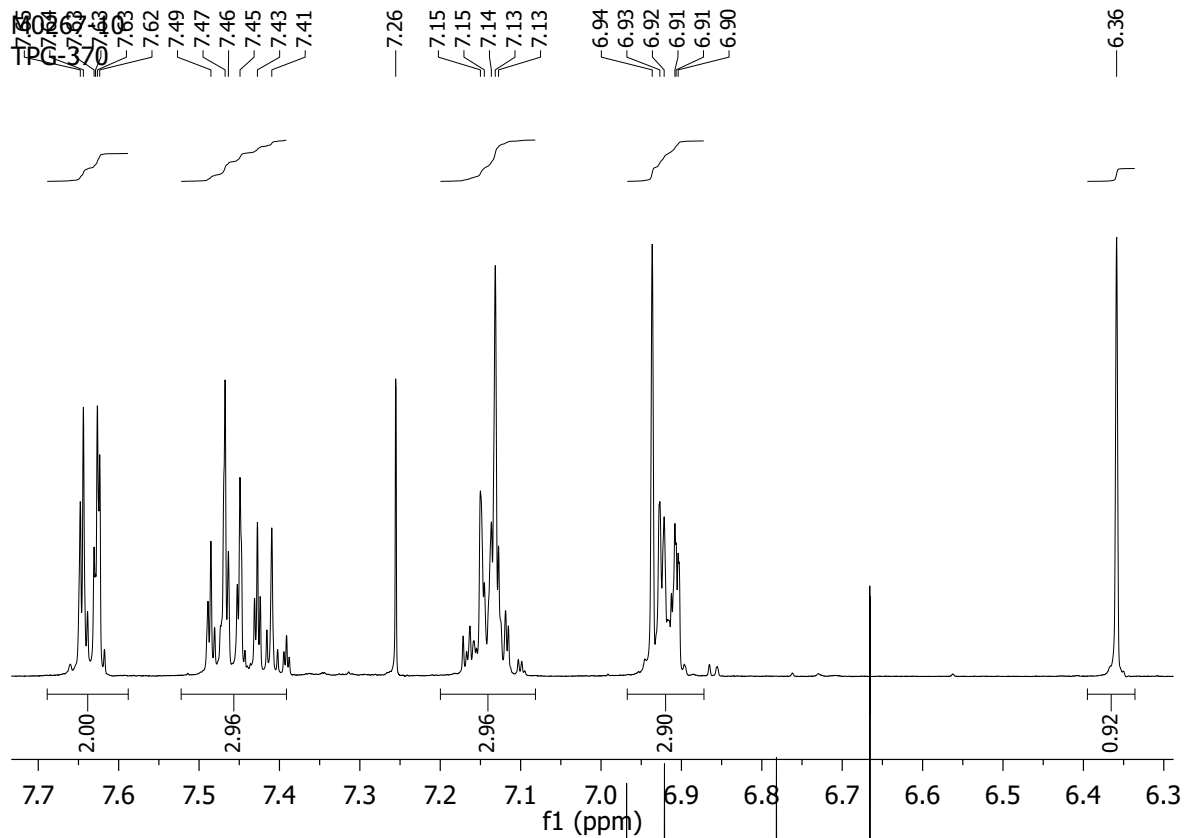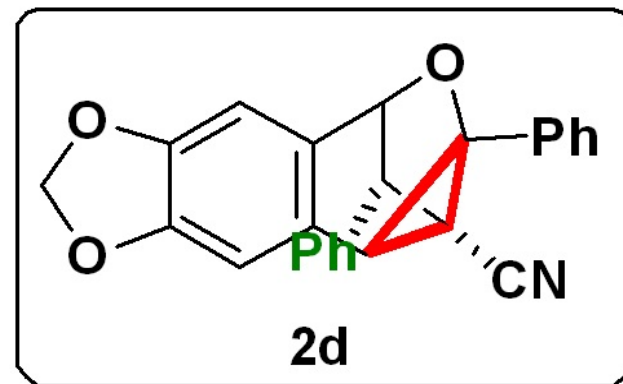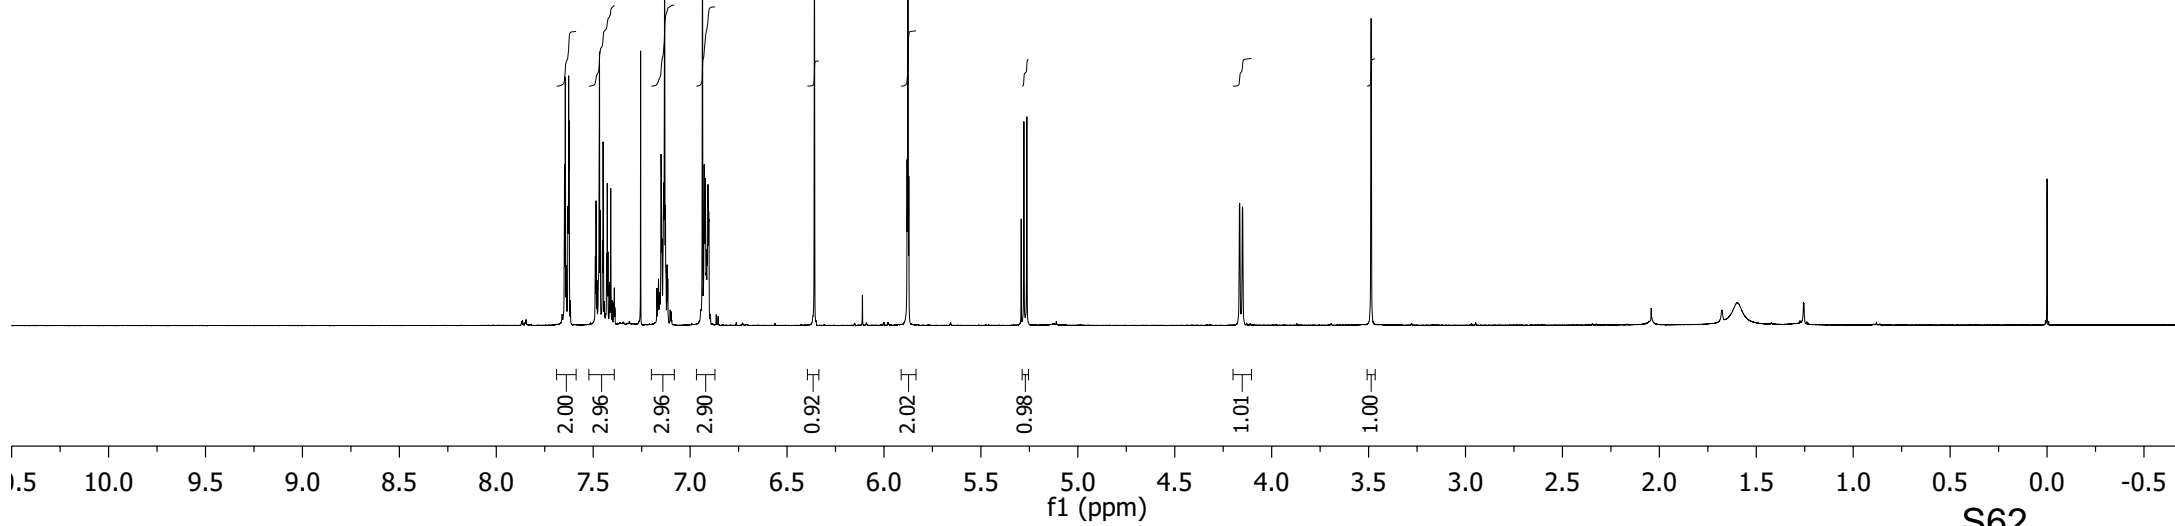

M0267-11  
TPG-370

Solvent  $\text{CDCl}_3$   
Spectrometer Frequency 100.69

147.71  
146.78  
132.67  
132.26  
128.90  
128.71  
128.50  
127.51  
127.39  
126.29  
125.32  
122.79  
118.55  
107.15  
106.14  
101.04

78.84  
77.31  
76.99  
76.67

68.83

46.89

31.22

23.67

M0267-11  
TPG-370

128.90  
128.71  
128.50  
127.51  
127.39  
126.29  
125.32

122.79

118.55

107.15

106.14

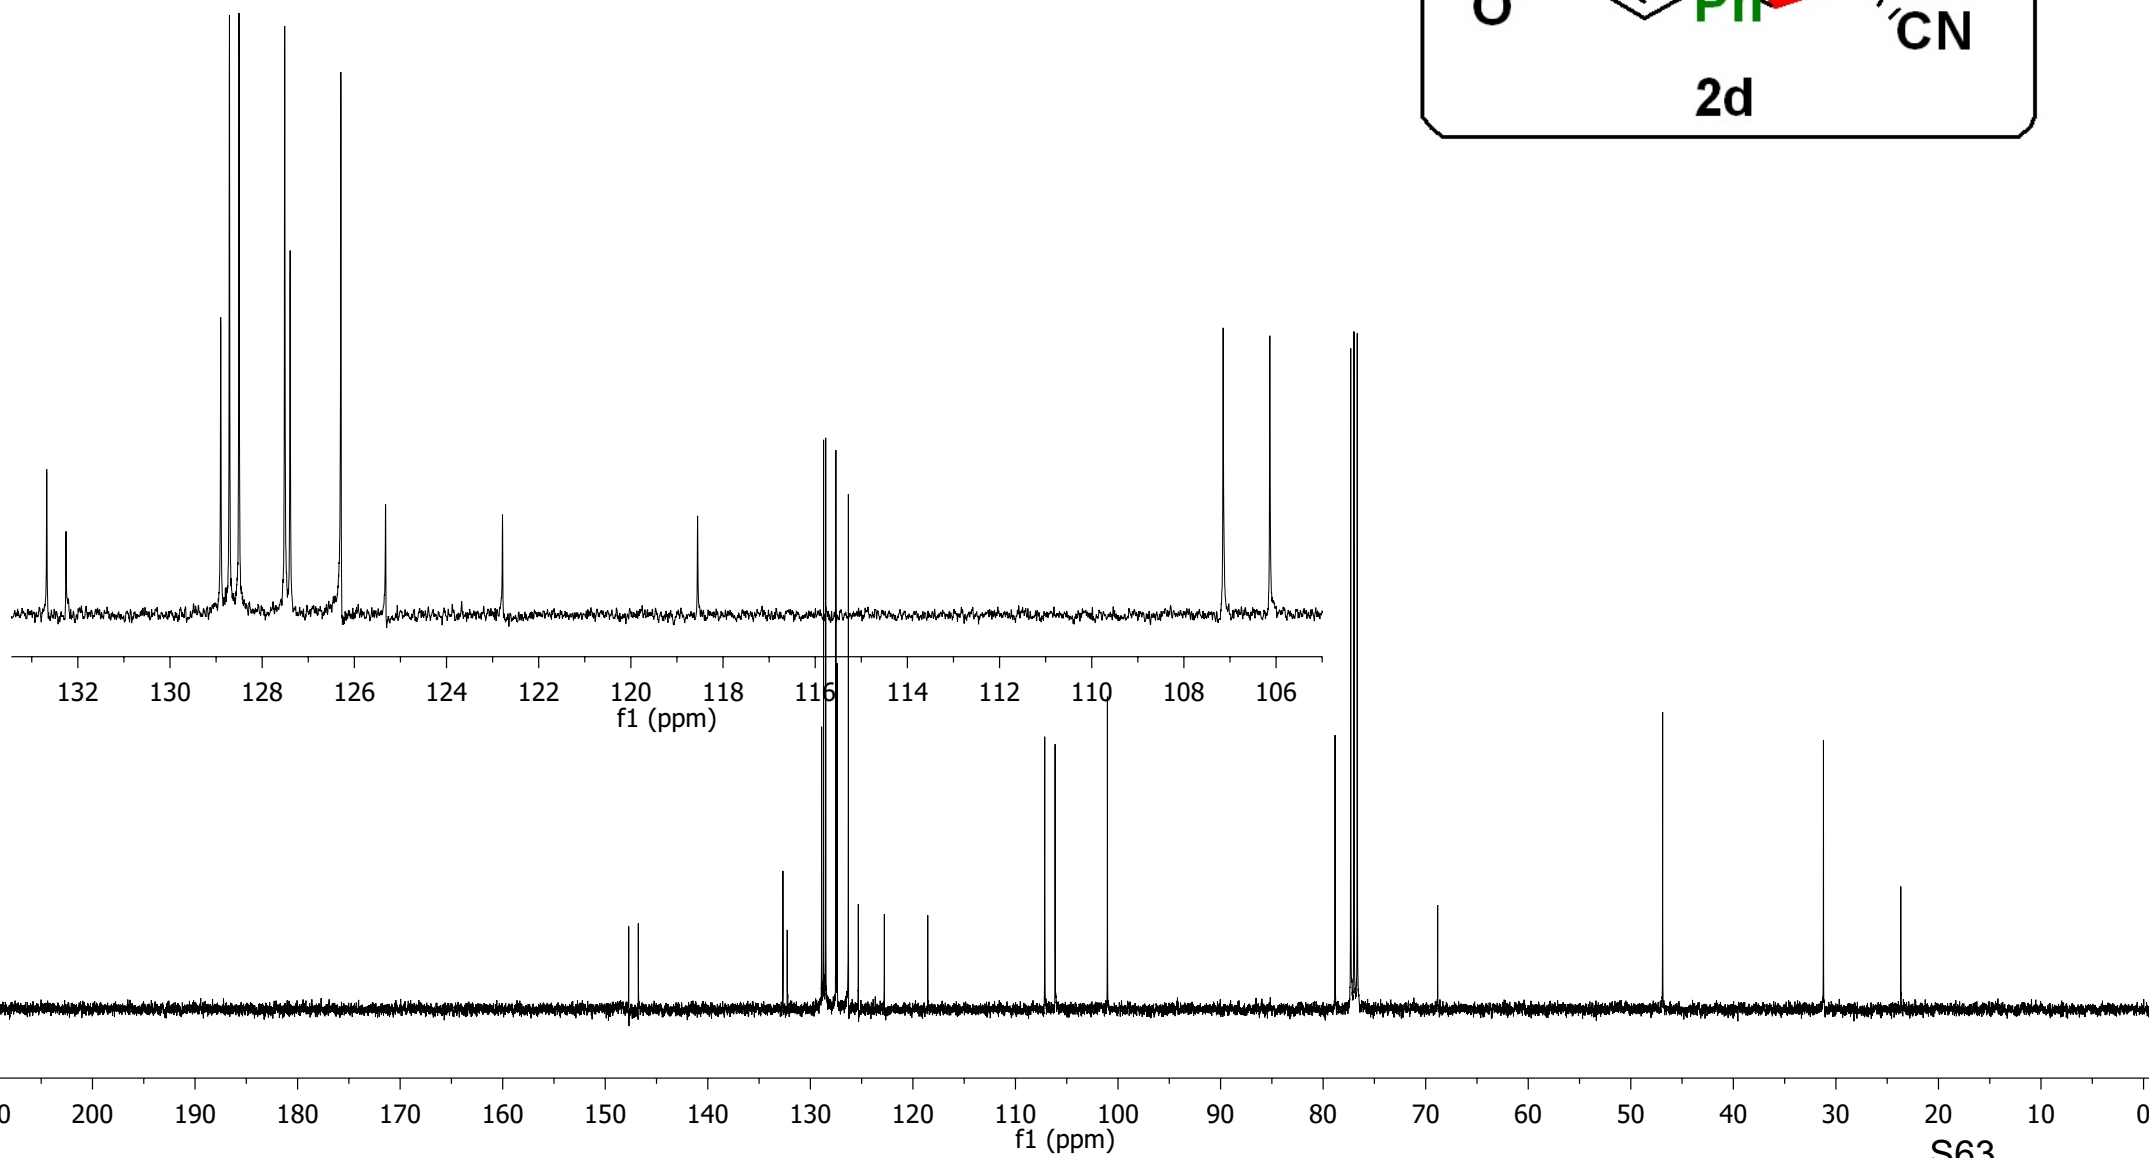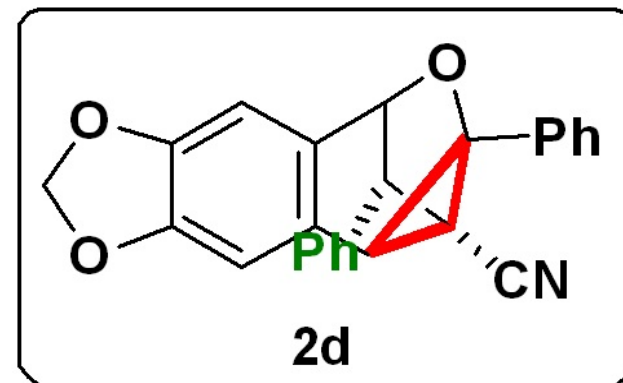

M0257-7  
TPG-361

Solvent CDCl<sub>3</sub>  
Spectrometer Frequency 400.28

7.67 7.66 7.66 7.65 7.64 7.49 7.49 7.47 7.47 7.45 7.43 7.43 7.42 7.41 7.25 7.12 7.10 7.10 7.09 7.02 7.01 6.90 6.90 6.89 6.89 6.88 6.88 6.77 6.75 6.63 6.62 6.61 6.60 5.34 5.32

4.20 4.18 3.78 3.53

1.56

0.00

7.67 7.66 7.66 7.65 7.64 7.49 7.49 7.47 7.47 7.45 7.43 7.43 7.42 7.41 7.25 7.12 7.10 7.10 7.09 7.02 7.01 6.90 6.90 6.89 6.89 6.88 6.88 6.77 6.75 6.63 6.62 6.61 6.60

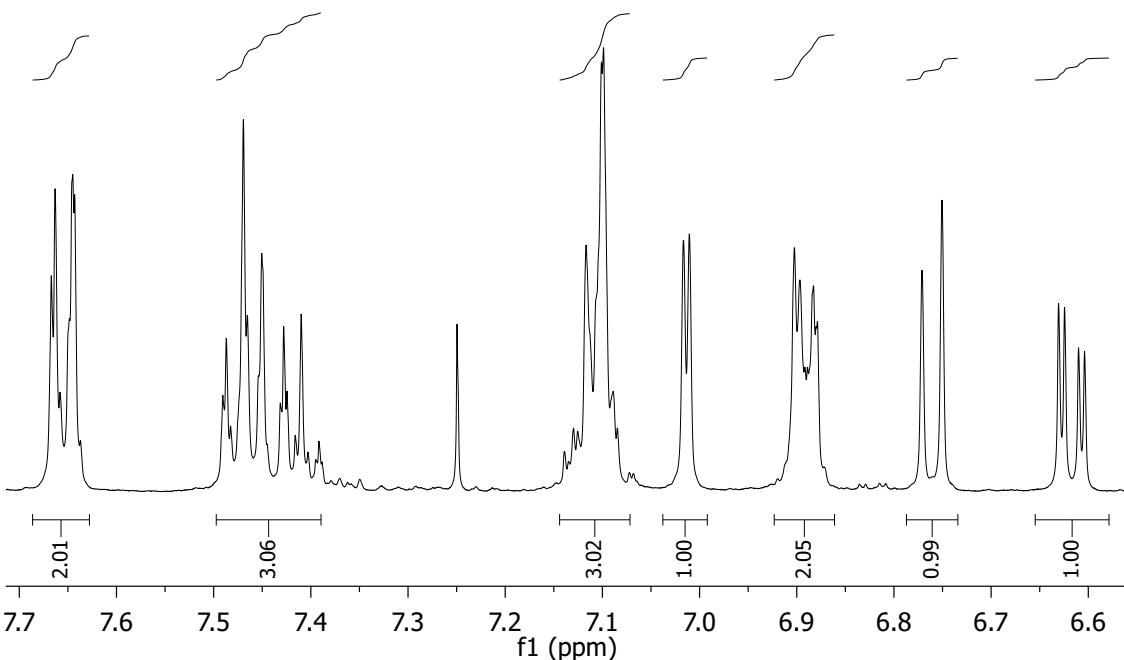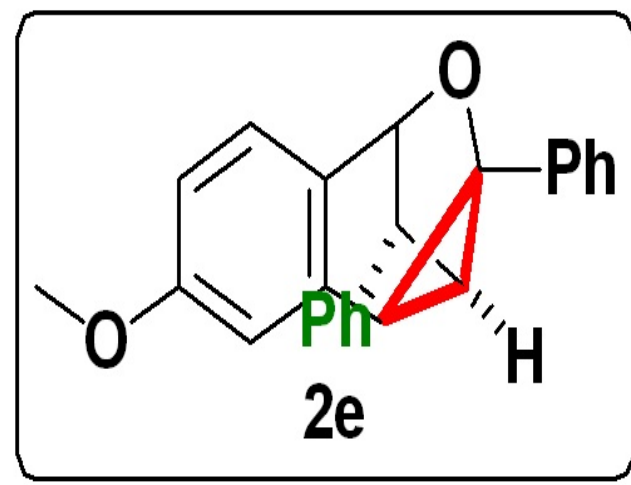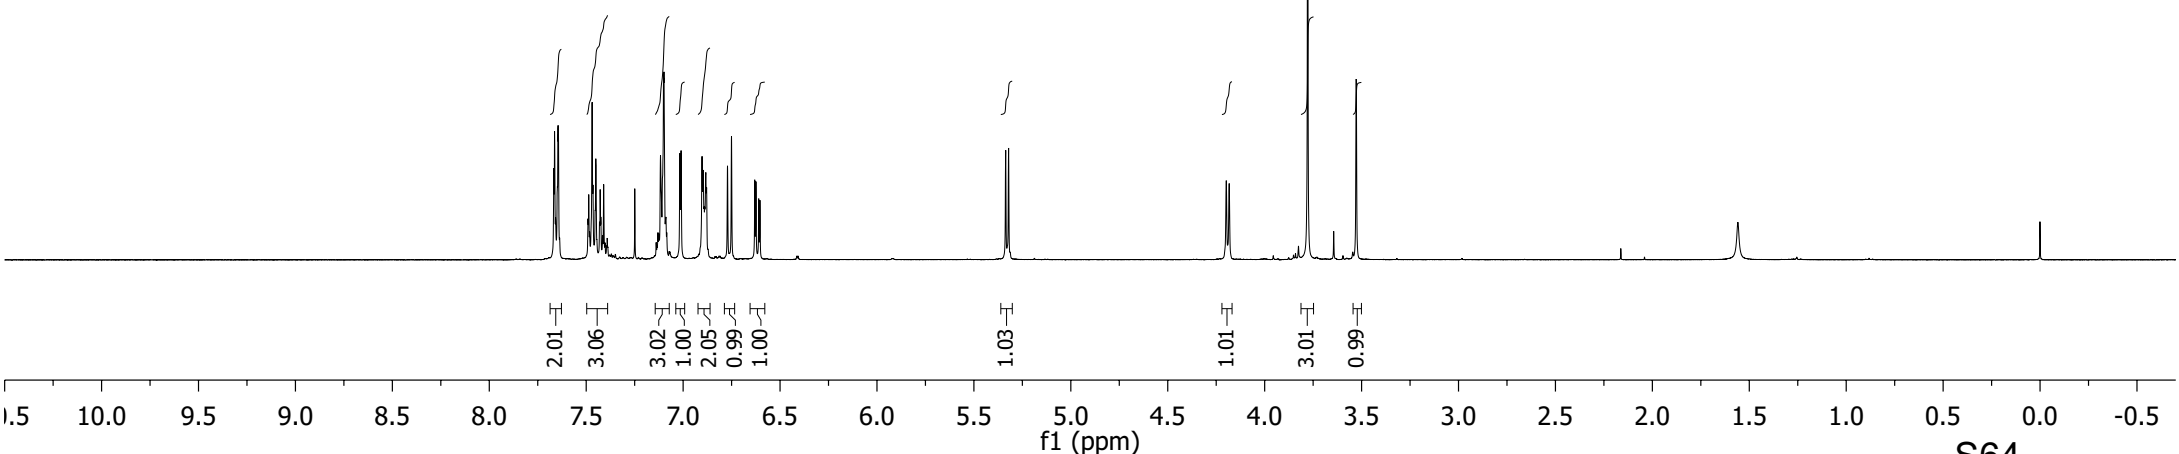



M0257-8  
TPG-361

Solvent

$\text{CDCl}_3$

Spectrometer Frequency 100.66

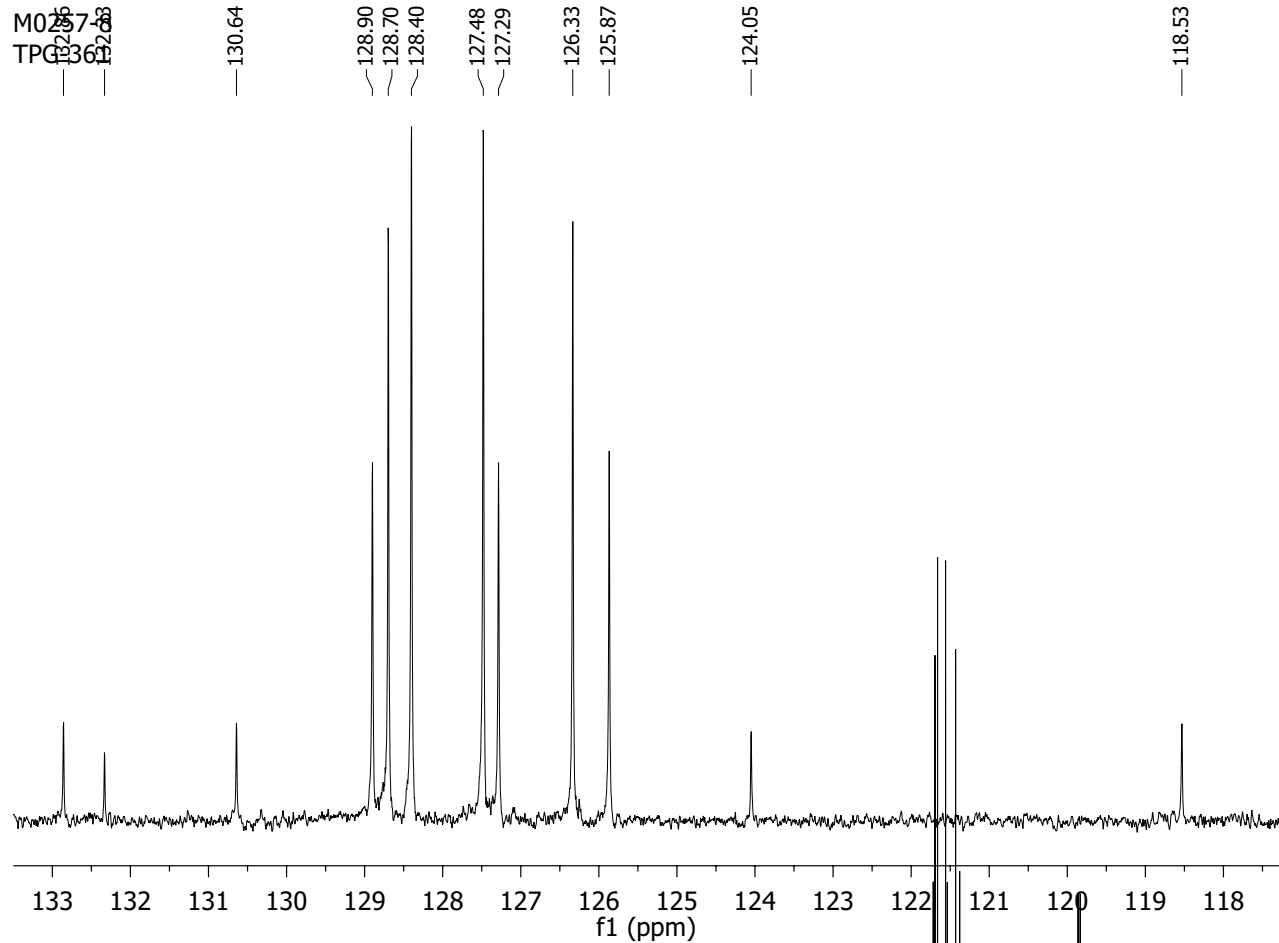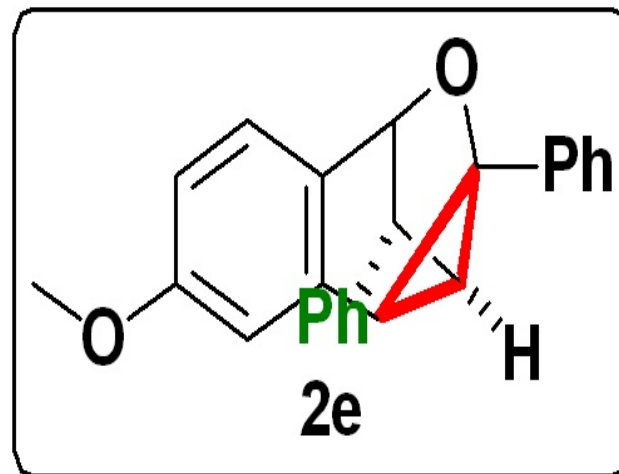

230 220 210 200 190 180 170 160 150 140 130 120 110 100 90 80 70 60 50 40 30 20 10 0

S65

M02894  
TPG-379  
Solvent CDCl<sub>3</sub>  
Spectrometer Frequency 400.40

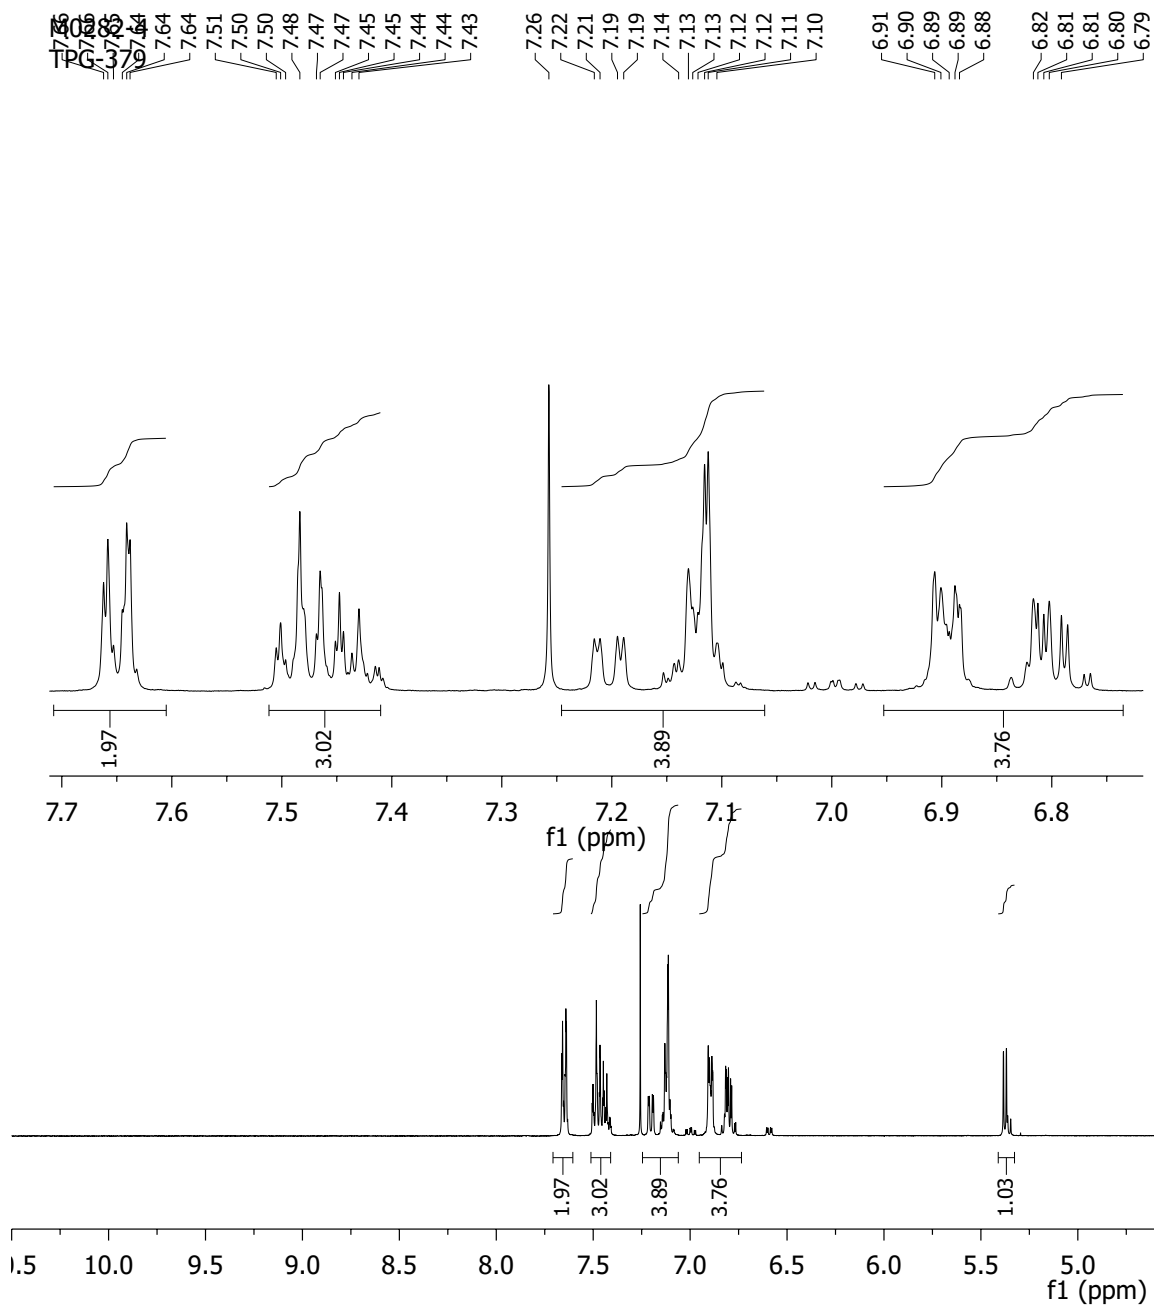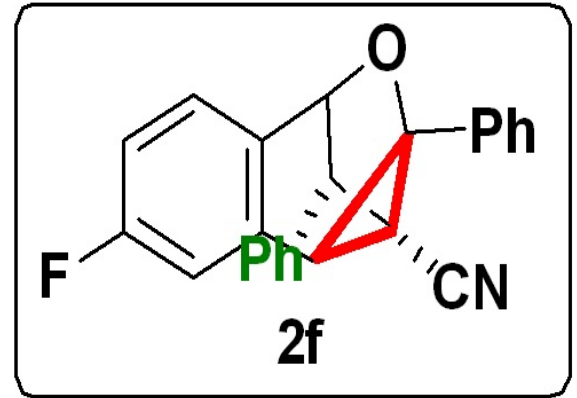

M0282-5  
TPG-379

Solvent

CDC<sub>3</sub>

Spectrometer Frequency 100.69

163.85  
161.39  
132.39  
131.85  
131.45  
131.36  
129.12  
129.06  
128.79  
128.54  
128.54  
127.59  
127.49  
127.36  
127.33  
126.46  
126.38  
126.32  
118.10  
115.81  
115.52  
114.07  
113.85  
113.62  
112.54  
112.25

78.53  
77.31  
76.99  
76.67  
69.35

46.94  
46.70

30.91  
30.88  
30.37

24.09

208.25  
207.25  
131.45  
131.36  
129.12  
129.06  
128.79  
128.54  
127.49  
127.33  
126.46  
126.38  
126.32

118.10

115.81  
115.52

114.07  
113.85  
113.62

112.54  
112.25

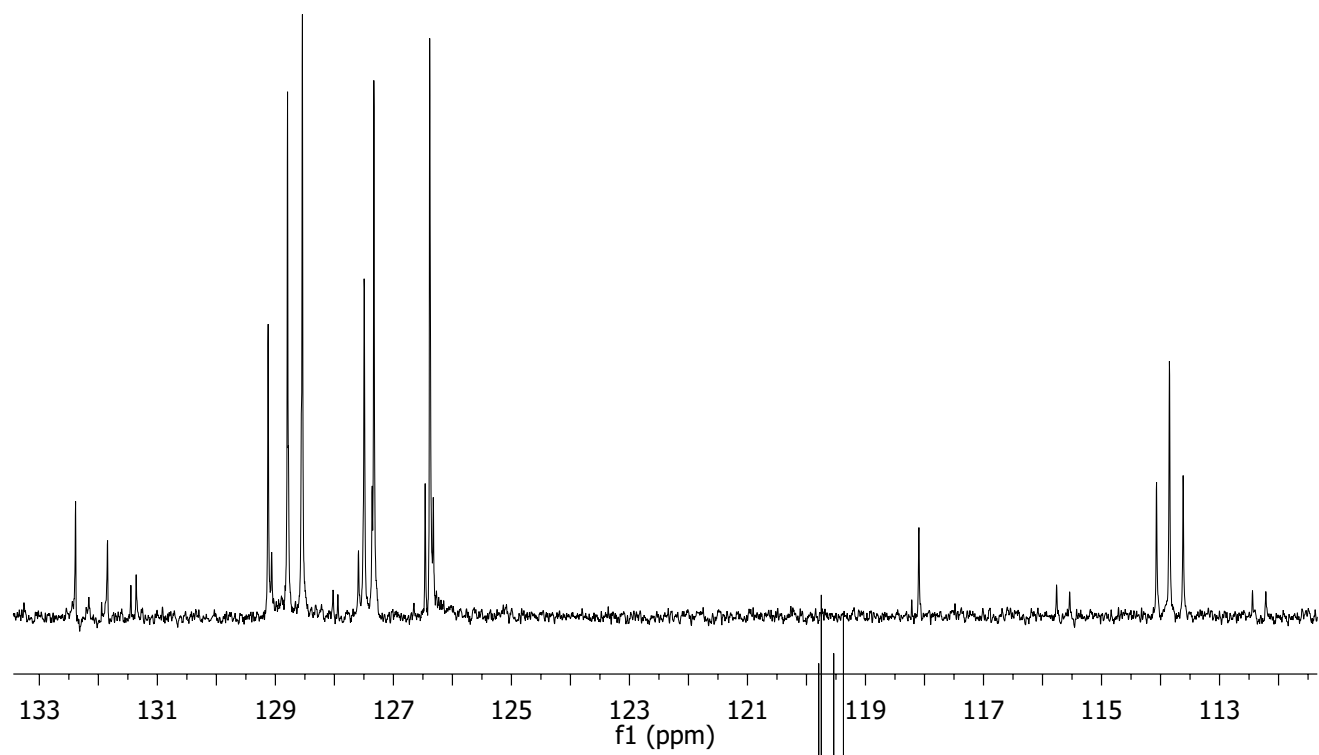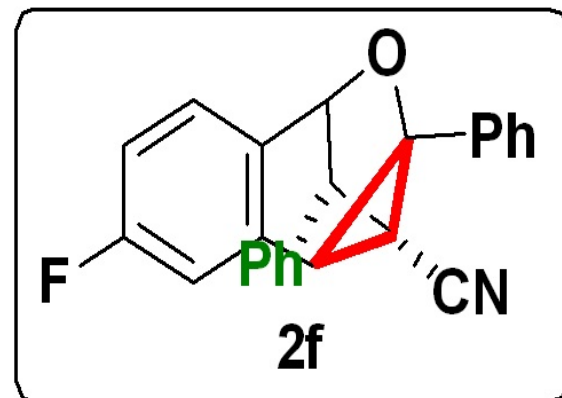

210 200 190 180 170 160 150 140 130 120 110 100 90 80 70 60 50 40 30 20 10 0

f1 (ppm)

S67

M0282-1-1  
TPG-378

7.65  
7.65  
7.64  
7.63  
7.63  
7.50  
7.50  
7.48  
7.48  
7.46  
7.45  
7.44  
7.44  
7.43  
7.42  
7.40  
7.29  
7.28  
7.27  
7.26  
7.14  
7.14  
7.13  
7.12  
6.91  
6.90  
6.89  
6.89  
6.87  
6.86  
5.36  
5.34

4.24  
4.23

3.57  
3.54

1.54

-0.00

Solvent CDCl<sub>3</sub>  
Spectrometer Frequency 400.40

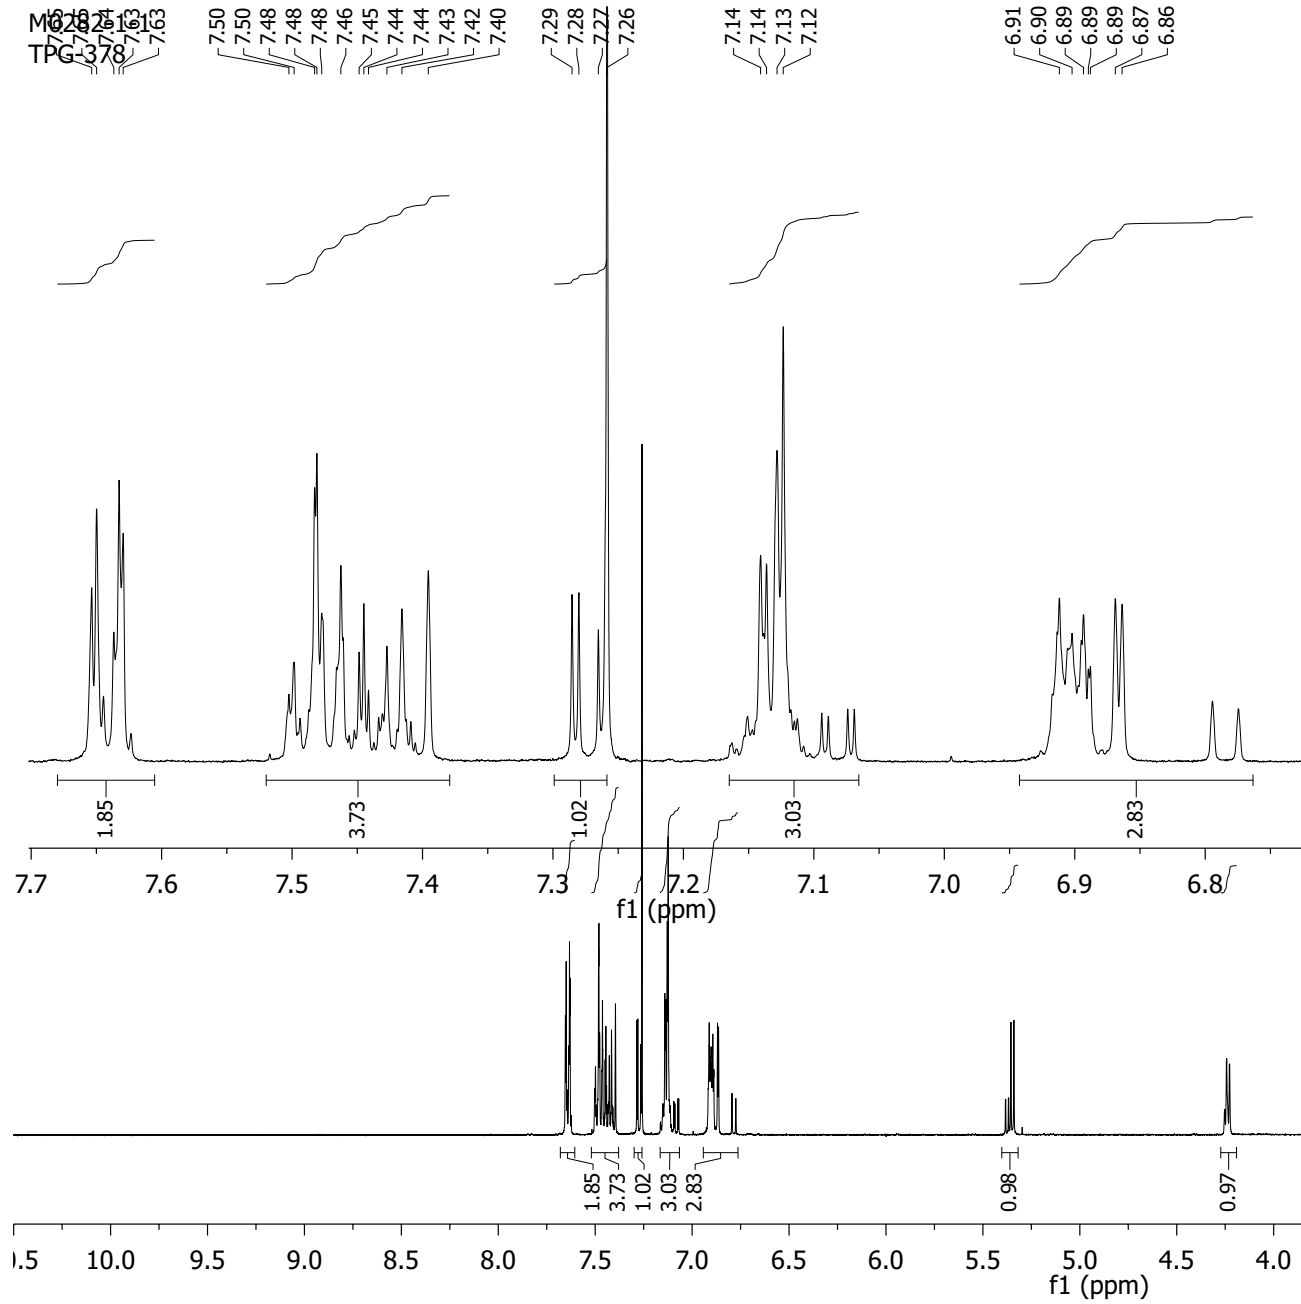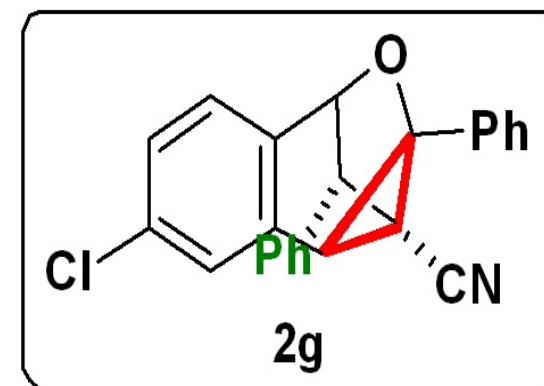

S68

M0282-2  
TPG-378

Solvent

CDCl<sub>3</sub>

Spectrometer Frequency 150.19

M0282-2

TPG-378

129.17

129.11

128.81

128.80

128.63

127.94

127.73

127.67

127.56

127.37

127.34

127.18

126.59

126.44

126.35

126.01

125.05

133.05

133.02

132.08

131.85

129.17

129.11

128.81

128.80

128.63

127.94

127.73

127.67

127.56

127.37

127.34

127.18

126.59

126.44

126.35

126.01

125.05

118.06

78.51

77.20

76.99

76.78

69.52

46.80

46.70

30.60

30.50

24.04

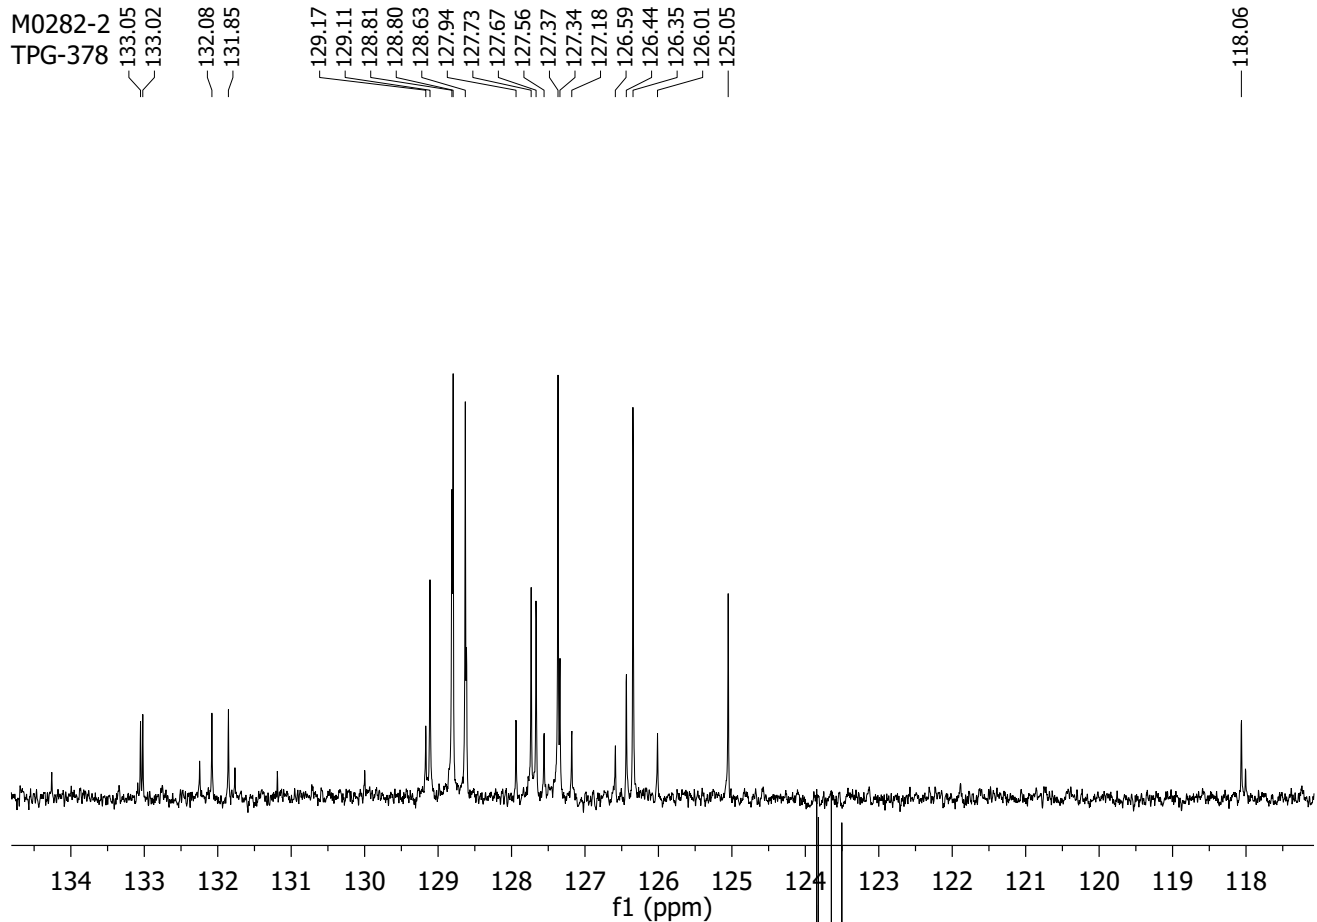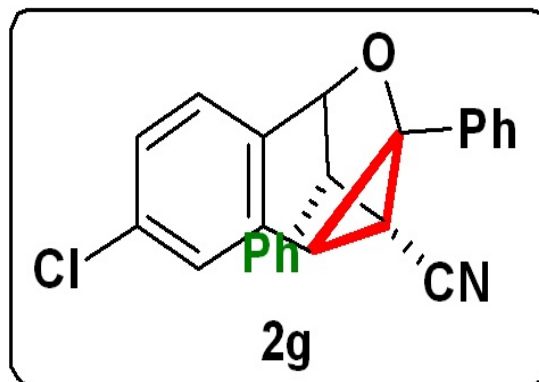

10 200 190 180 170 160 150 140 130 120 110 100 90 80 70 60 50 40 30 20 10 0

f1 (ppm)

S69

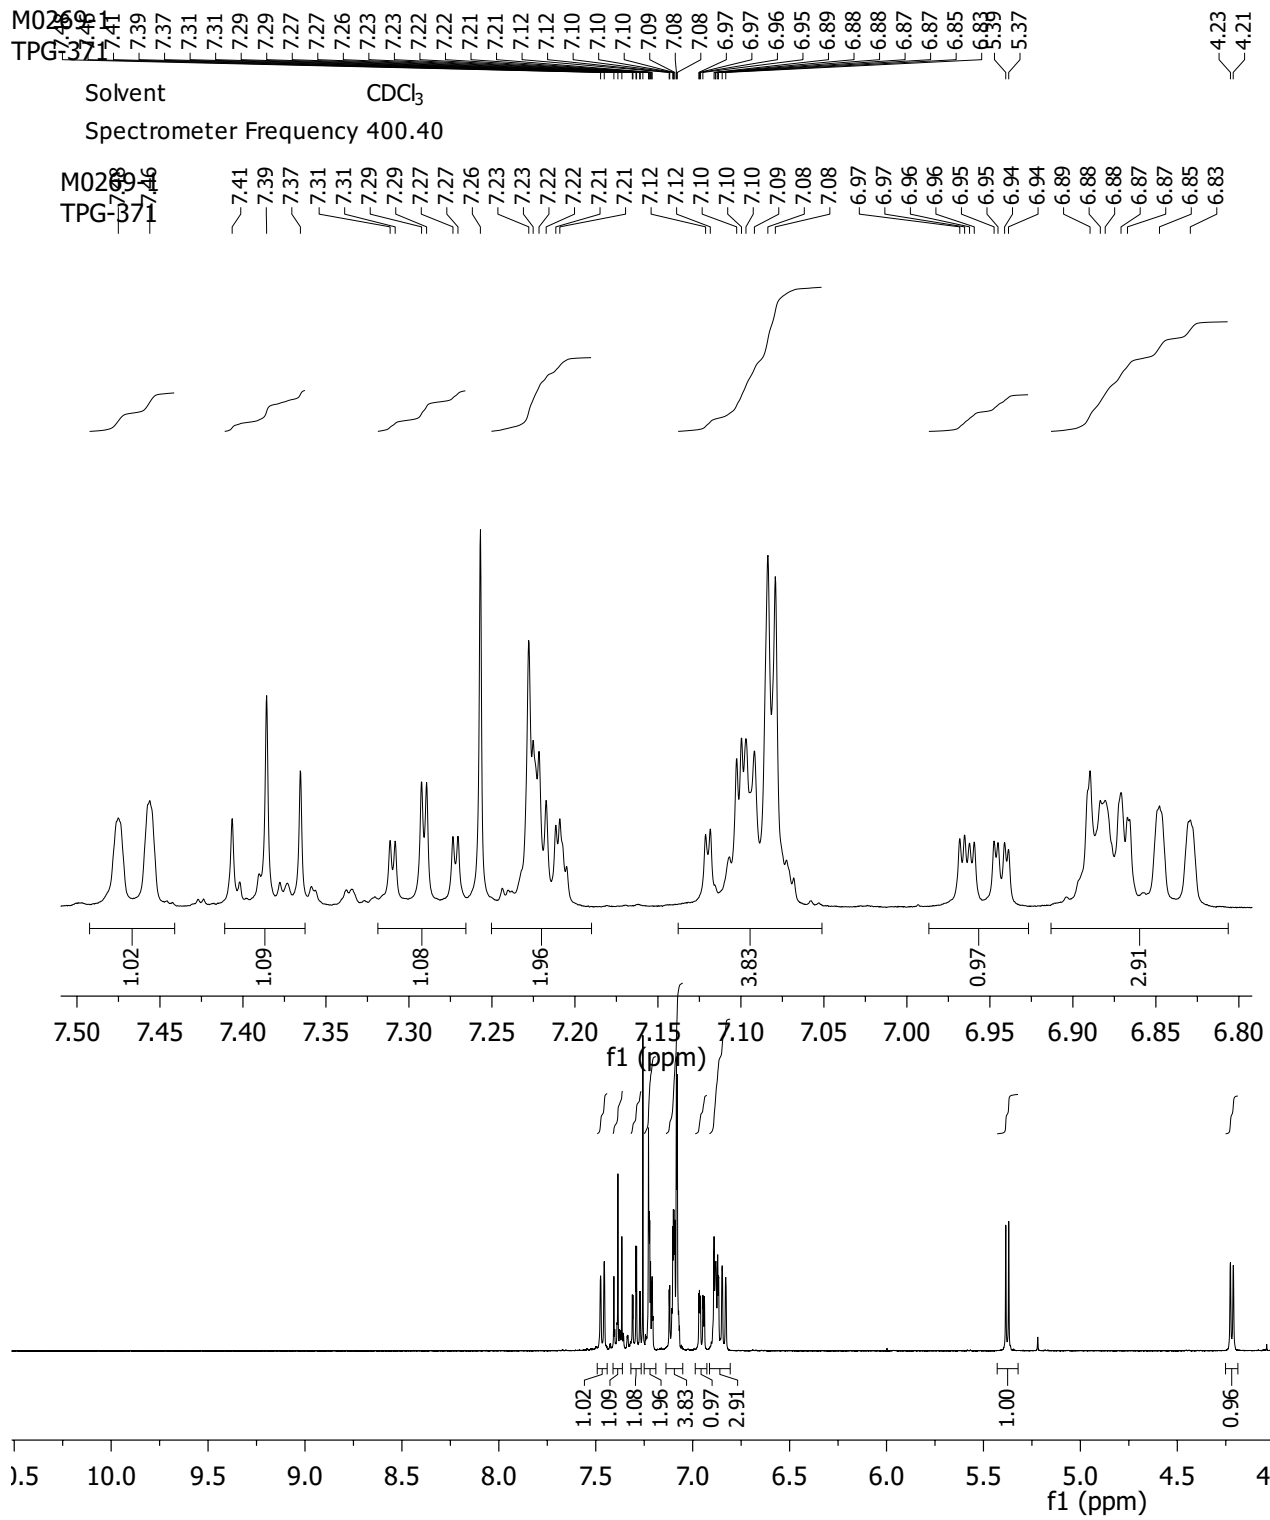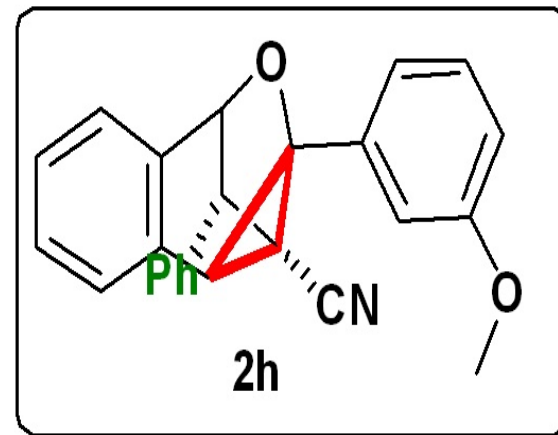

M0269-2  
TPG-371 Solvent  $\text{CDCl}_3$   
Spectrometer Frequency 100.69

133.81  
132.59  
131.49  
129.80  
129.34  
128.68  
128.38  
127.45  
127.35  
127.02  
126.48  
124.71  
118.45  
118.28  
114.74  
111.95  
110.46

79.12  
77.31  
76.99  
76.68  
69.37  
55.36  
46.89  
31.24  
24.17

M0269-2  
TPG-371  
131.49  
129.80  
129.34  
128.68  
128.38  
127.45  
127.35  
127.02  
126.48  
124.71

118.45  
118.28  
114.74  
111.95  
110.46

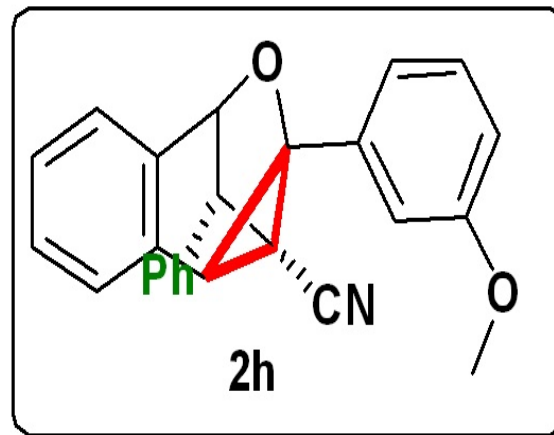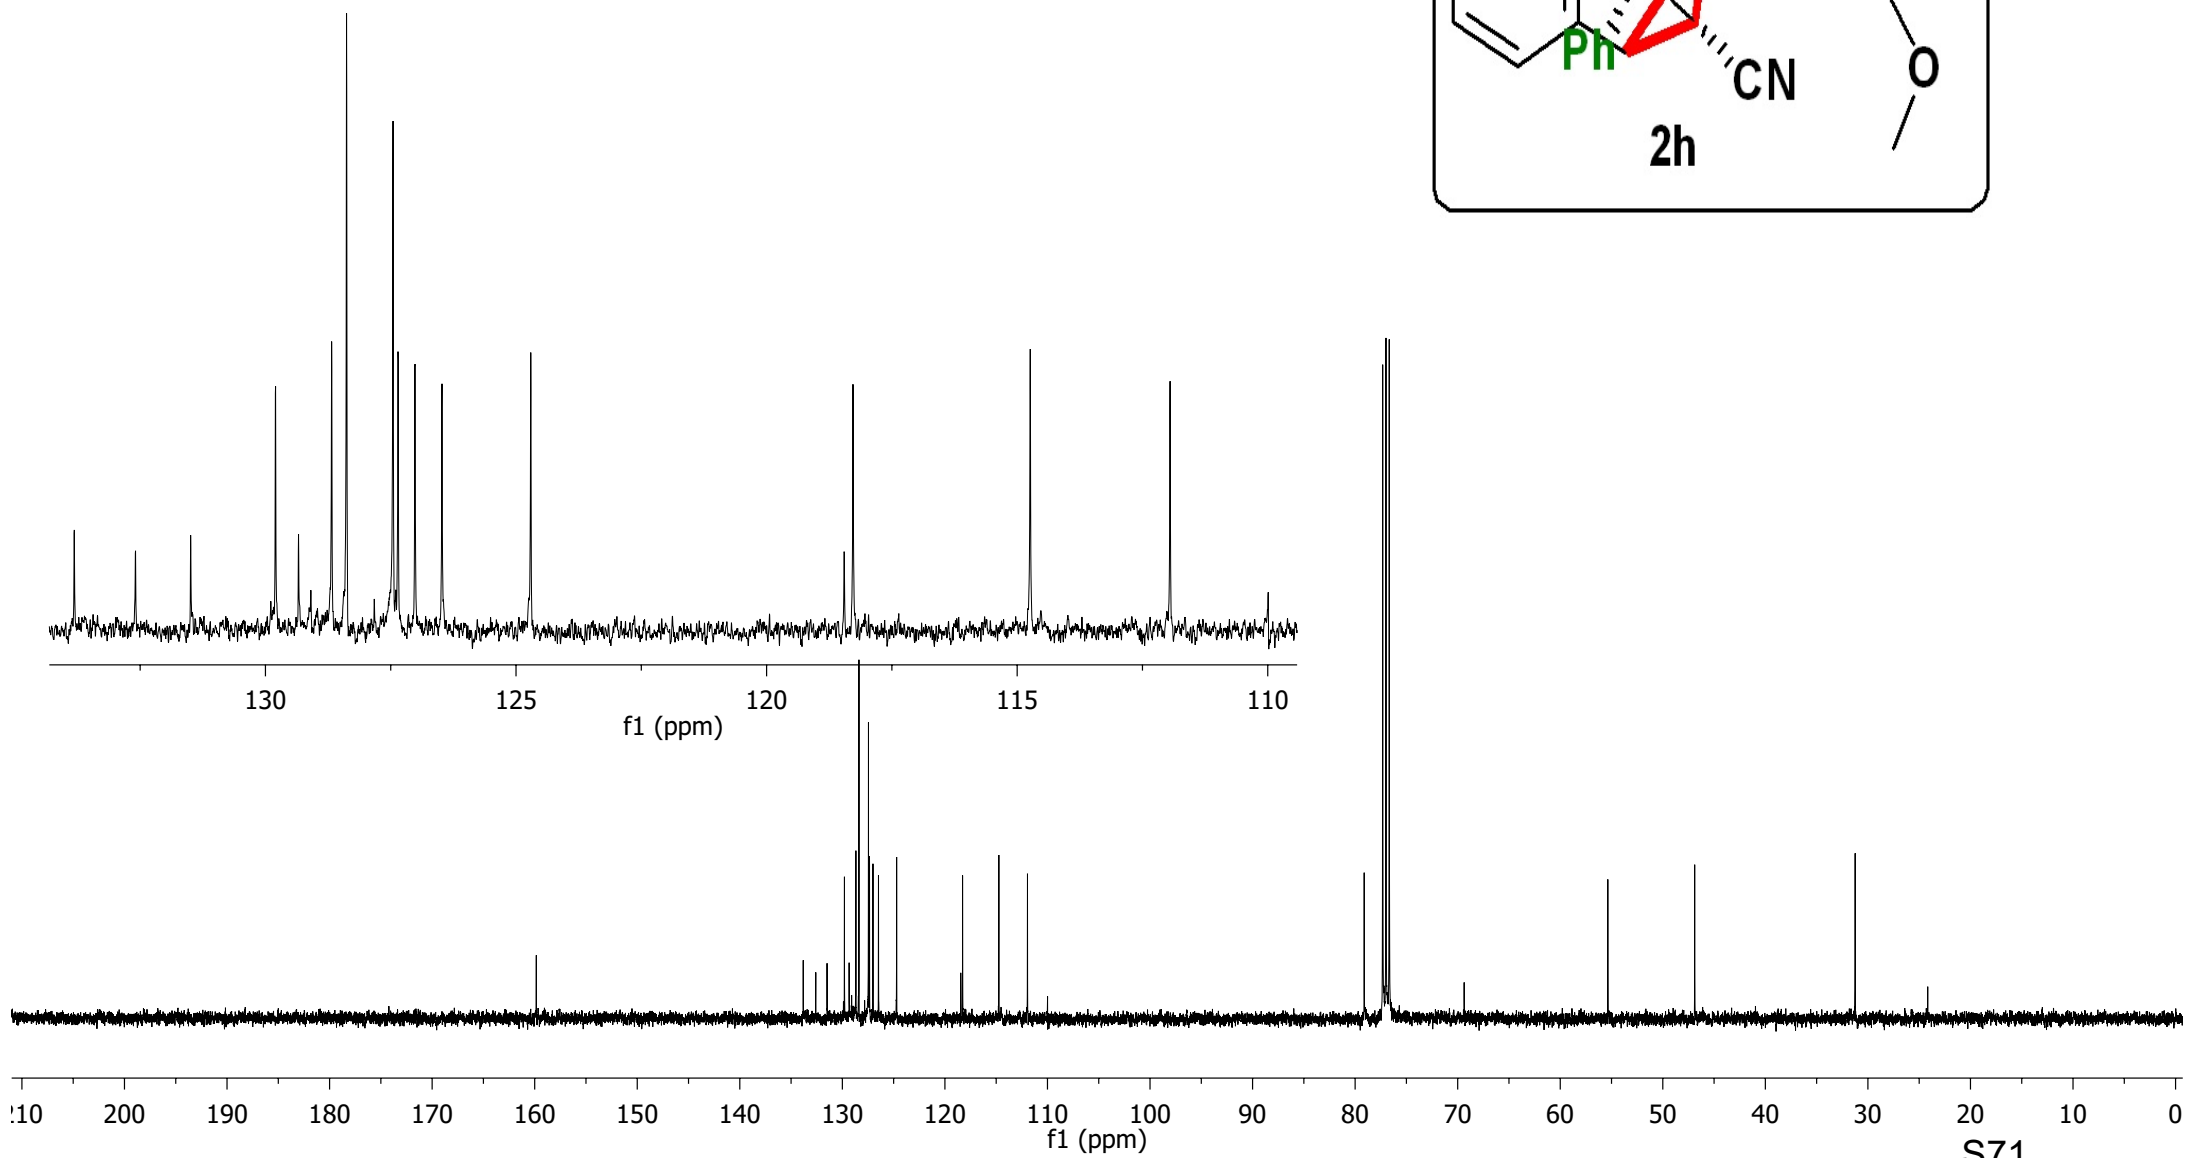

M0252-15  
TPG-355  
Solvent  $\text{CDCl}_3$   
Spectrometer Frequency 400.40

7.56  
7.55  
7.54  
7.53  
7.48  
7.46  
7.31  
7.30  
7.29  
7.29  
7.27  
7.27  
7.26  
7.11  
7.11  
7.10  
7.10  
7.09  
7.09  
7.08  
7.08  
7.07  
7.06  
6.89  
6.88  
6.88  
6.87  
6.87  
6.87  
6.84  
6.82  
5.37  
5.36

4.23  
4.21

3.56

2.39

1.55

0.00

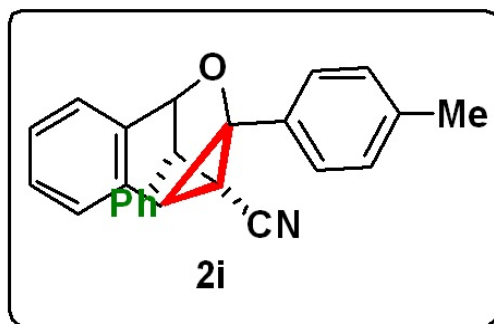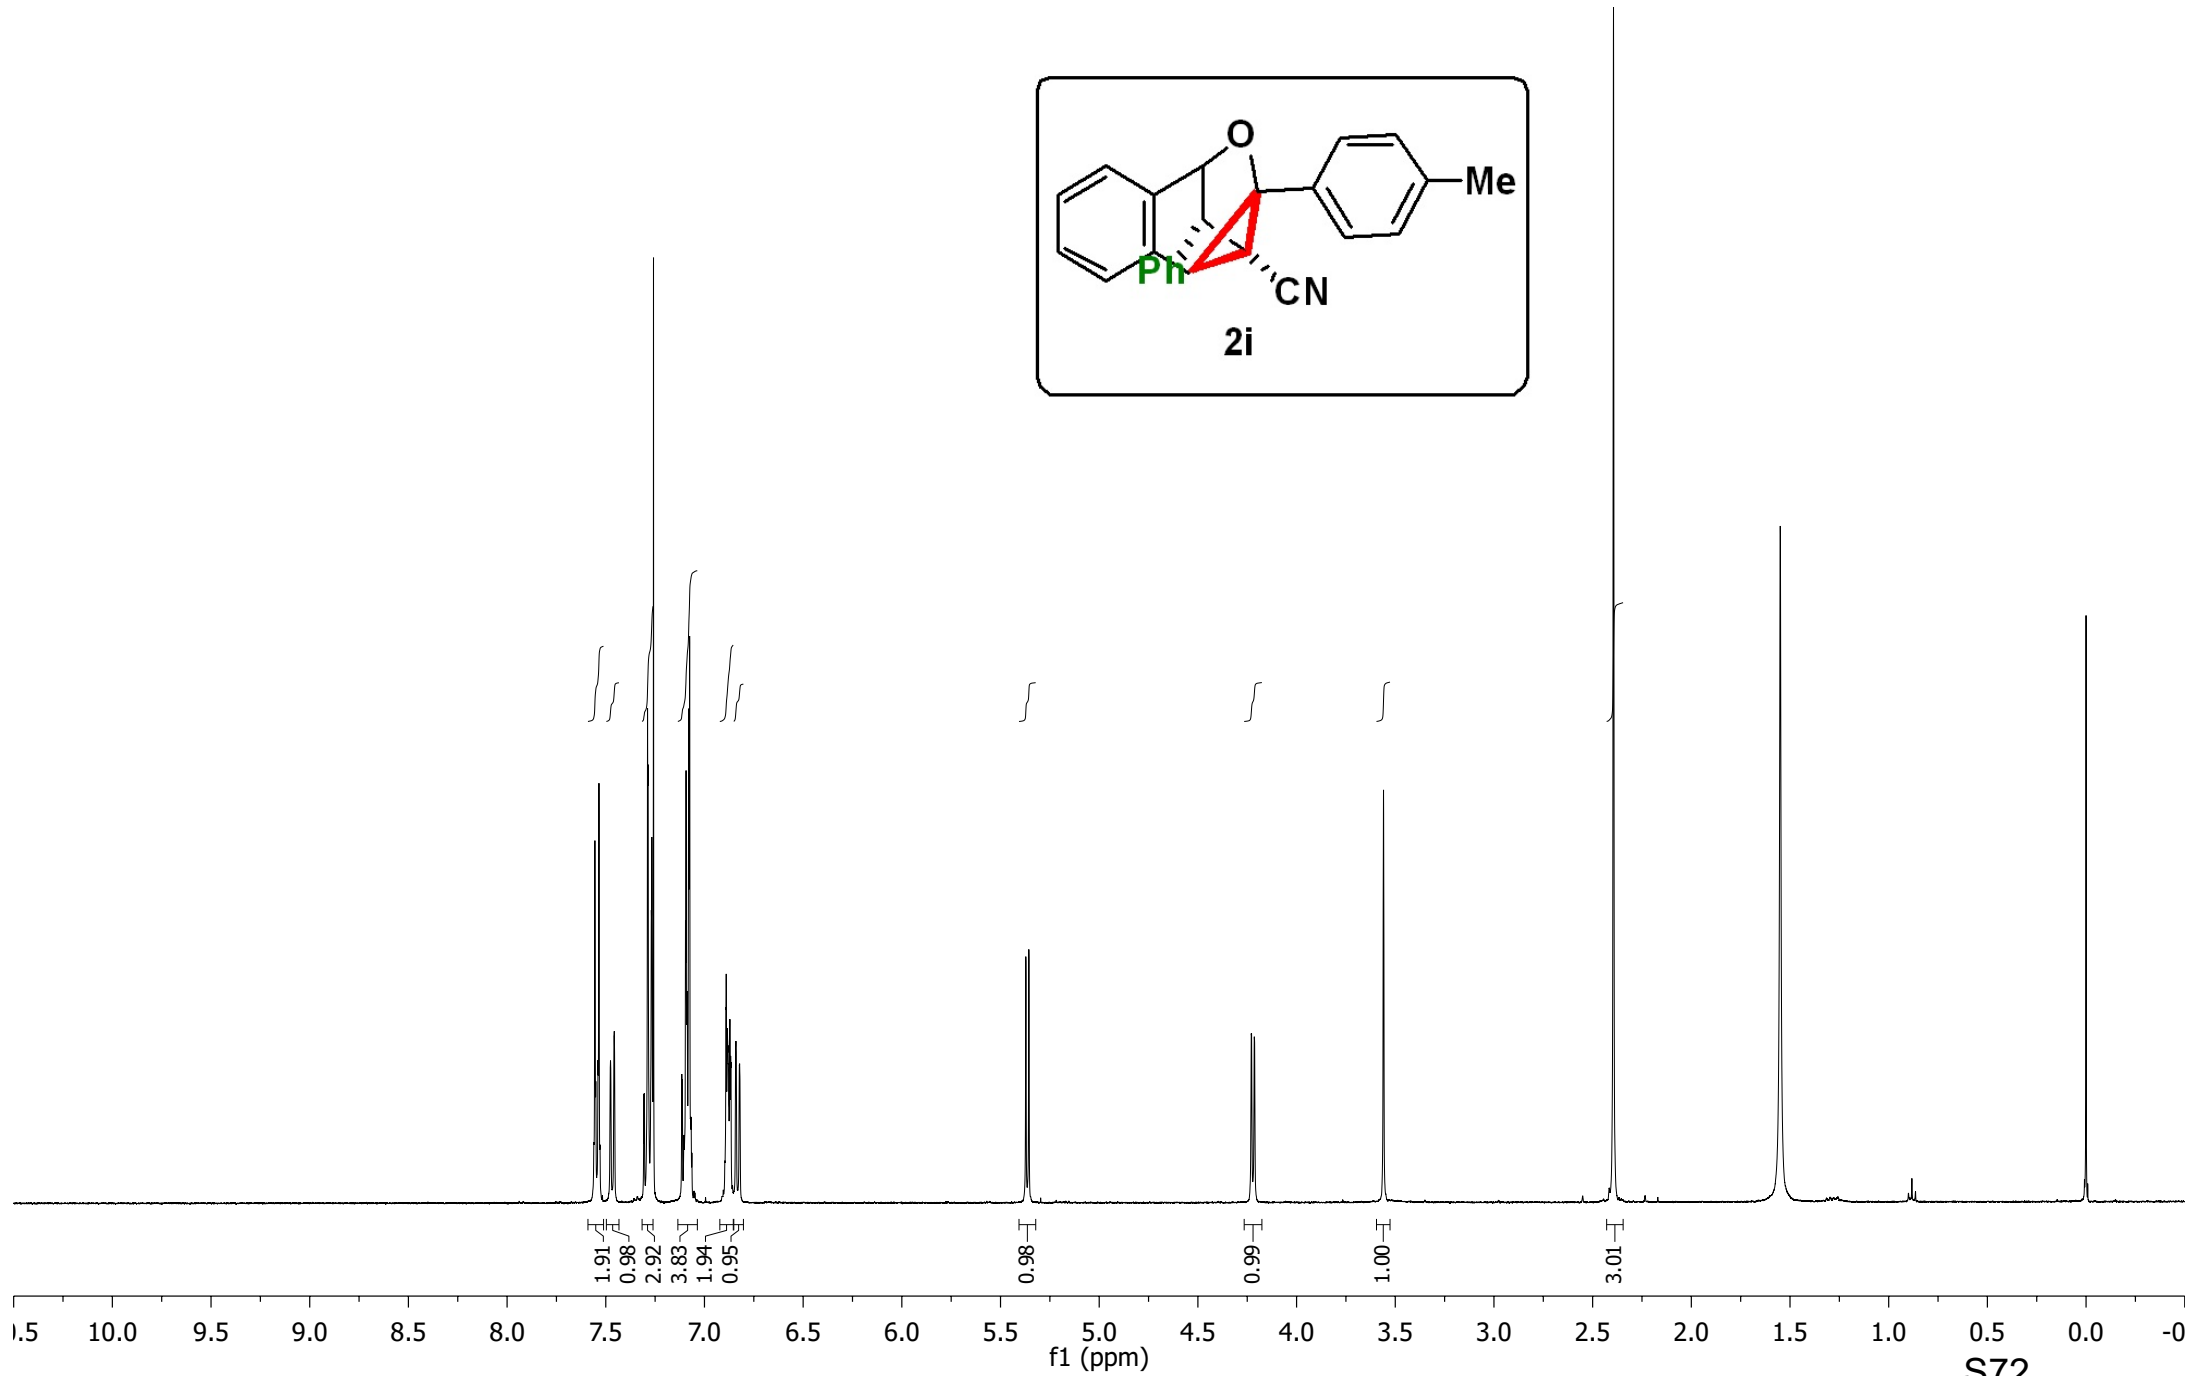



M0252-16  
TPG-355

Solvent  $\text{CDCl}_3$   
Spectrometer Frequency 100.69

M0252-16  
TPG-355

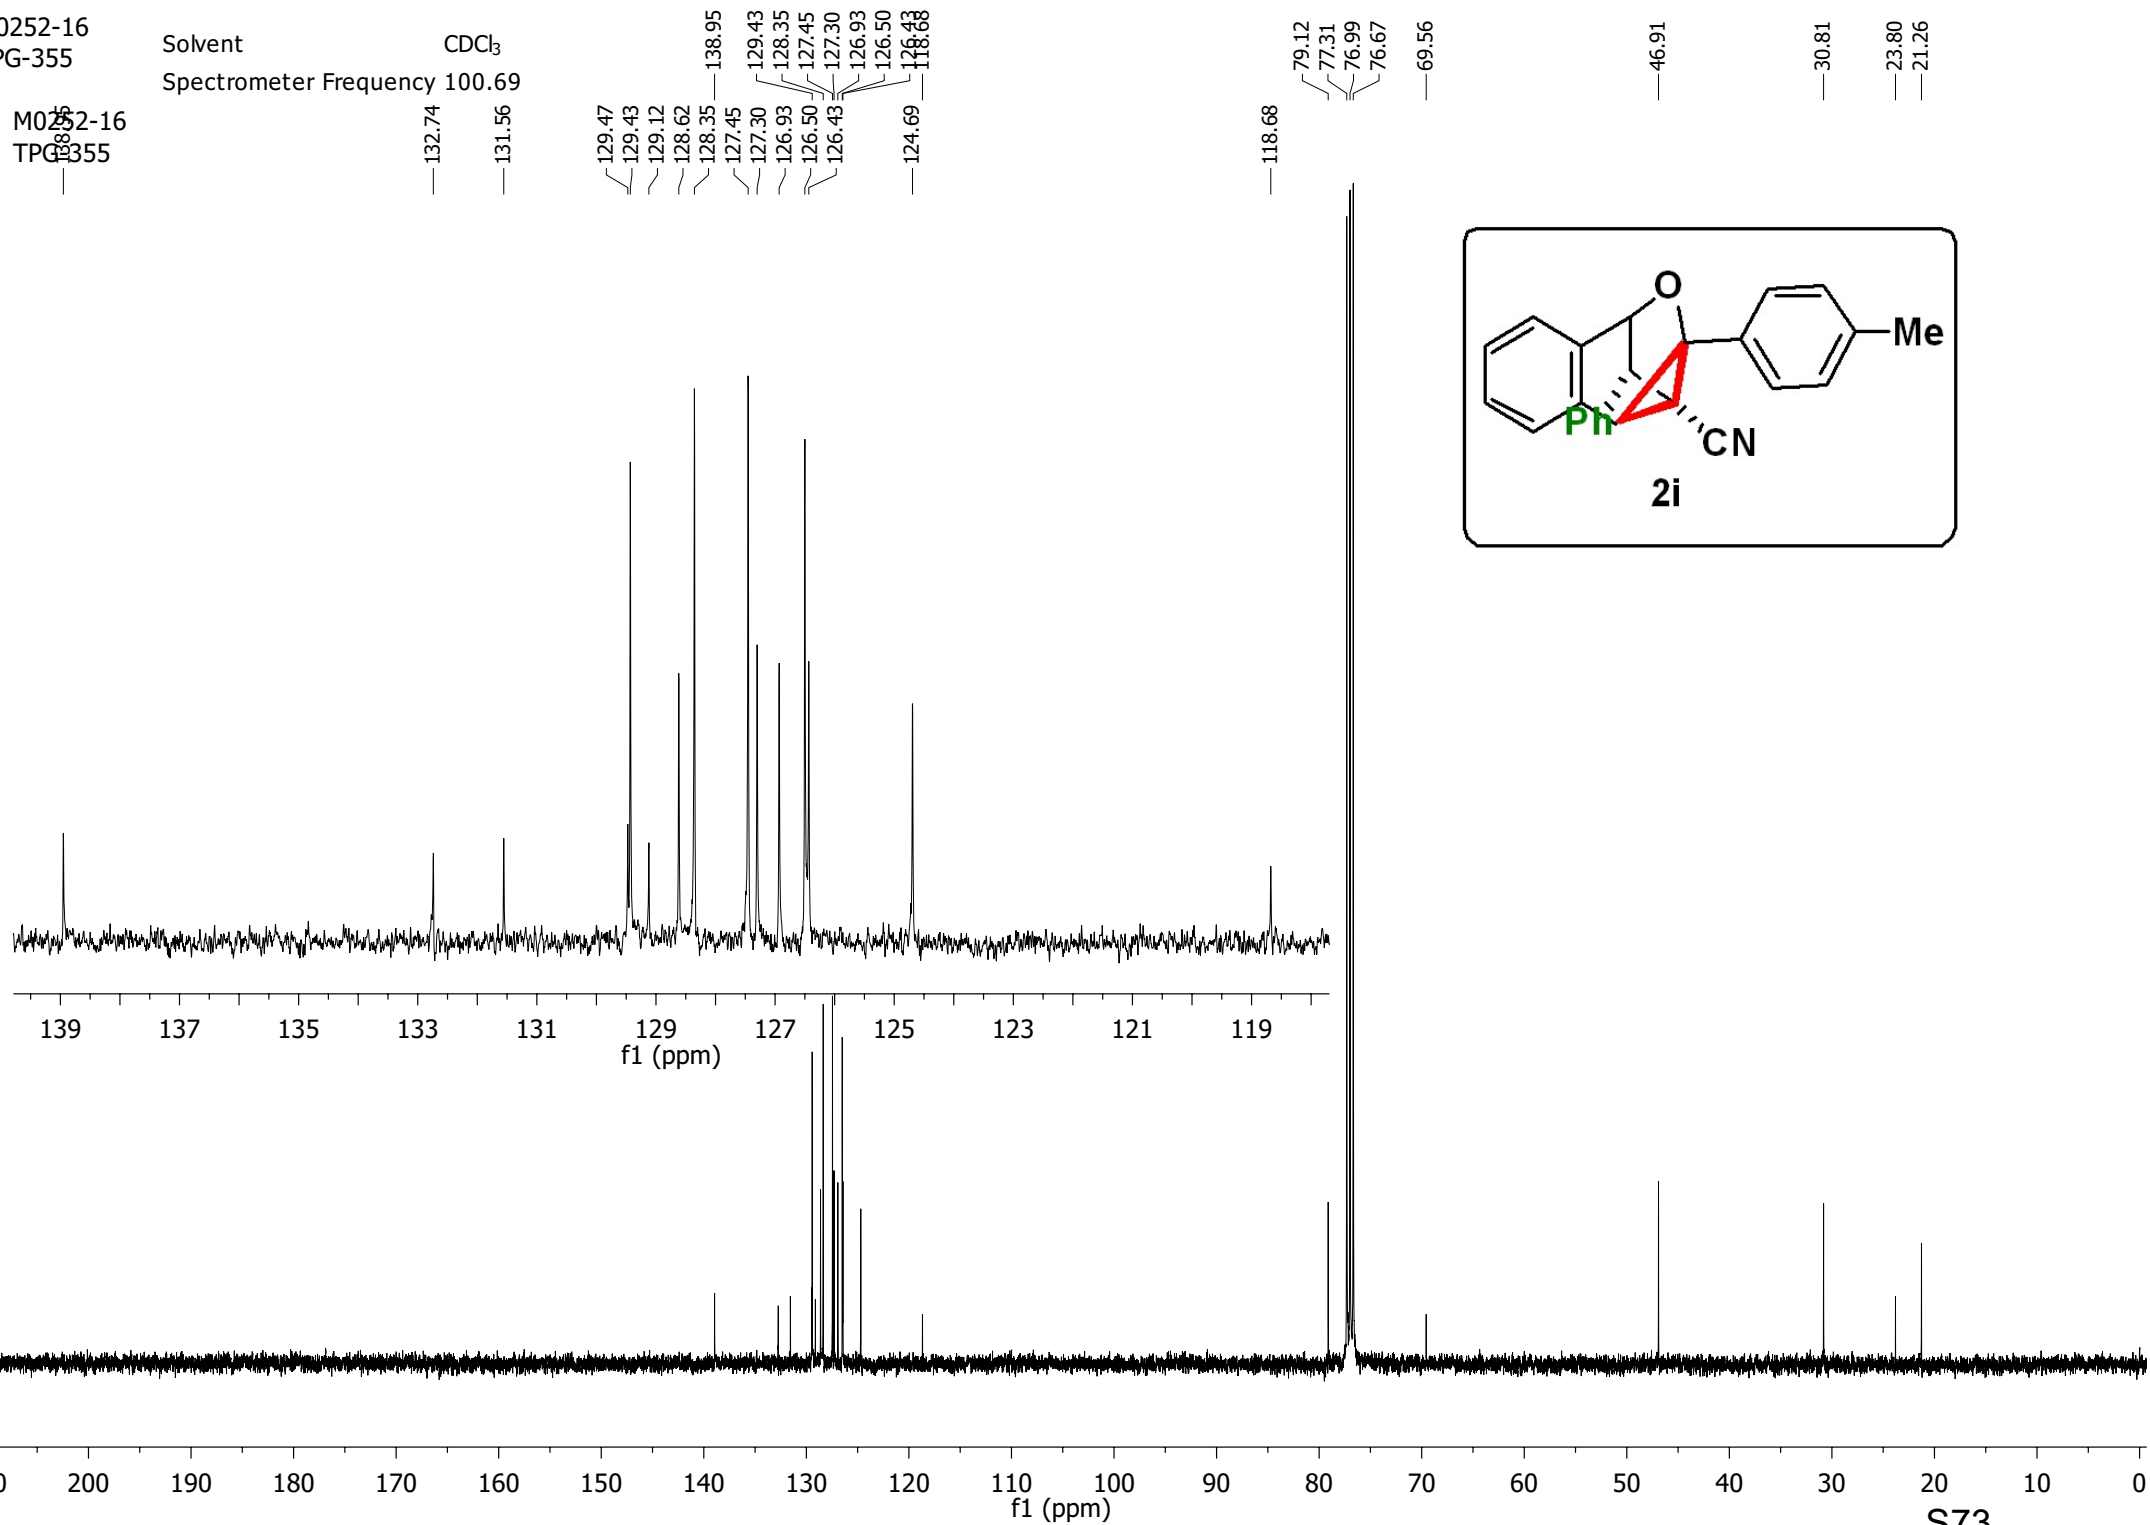

MO-55  
TPG-356

Solvent  $\text{CDCl}_3$

Spectrometer Frequency 400.40

MO-55  
TPG-356

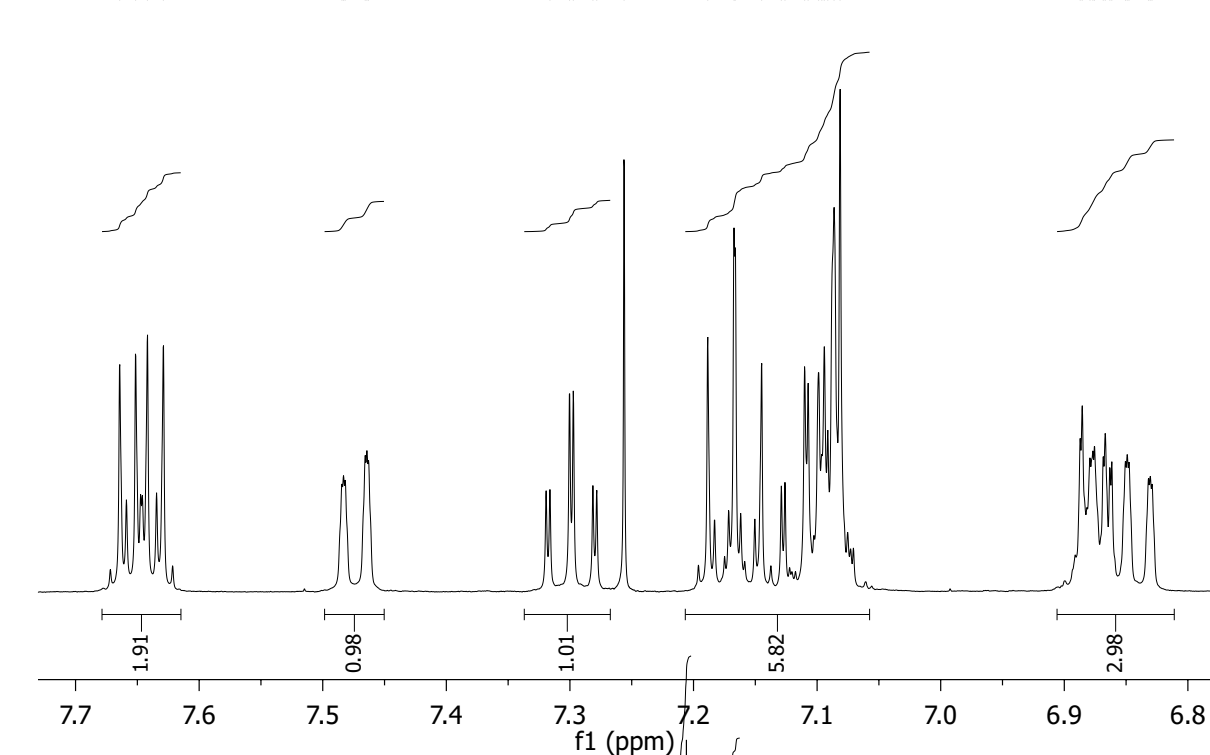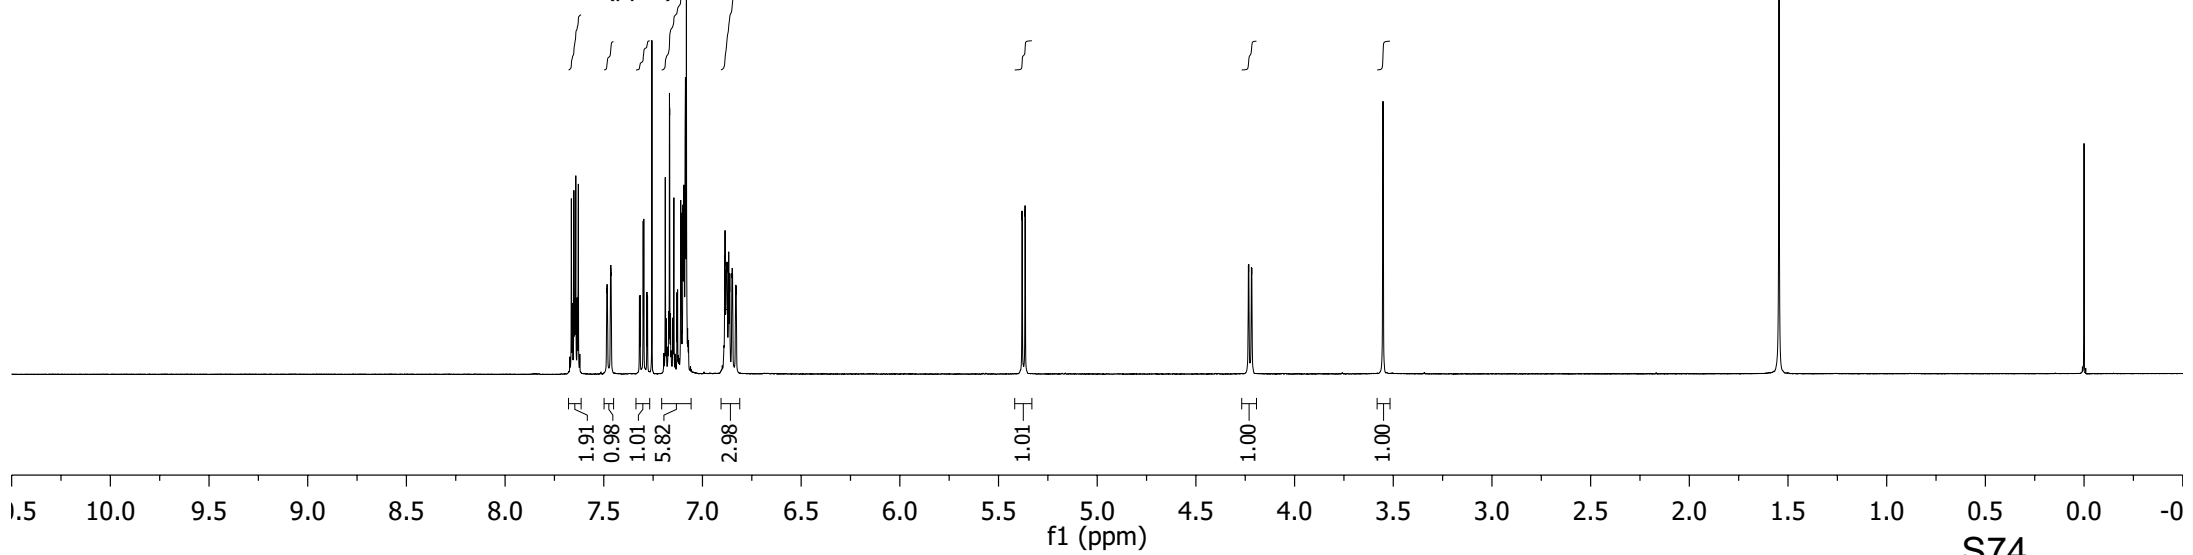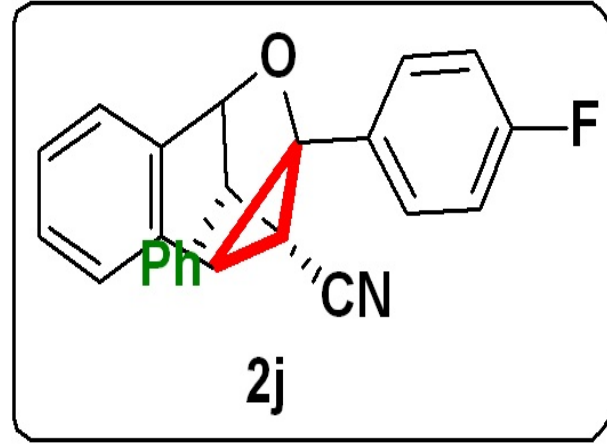

M0254-2  
TPG-356

Solvent  $\text{CDCl}_3$   
Spectrometer Frequency 100.69

164.32  
161.85  
132.48  
131.42  
129.16  
128.73  
128.63  
128.54  
128.41  
128.08  
127.41  
127.11  
126.47  
124.74  
118.45  
115.95  
115.73

79.19  
77.31  
76.99  
76.67  
69.11  
46.86  
30.83  
23.82

129.16  
128.73  
128.63  
128.54  
128.41  
128.08  
127.41  
127.11  
126.47  
124.74  
118.45  
115.95  
115.73

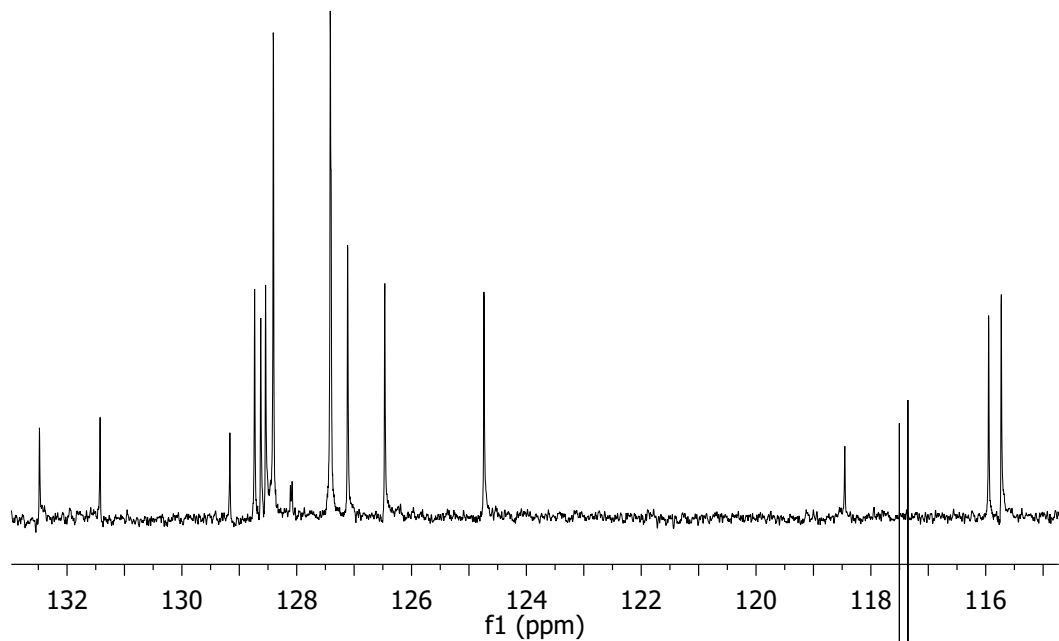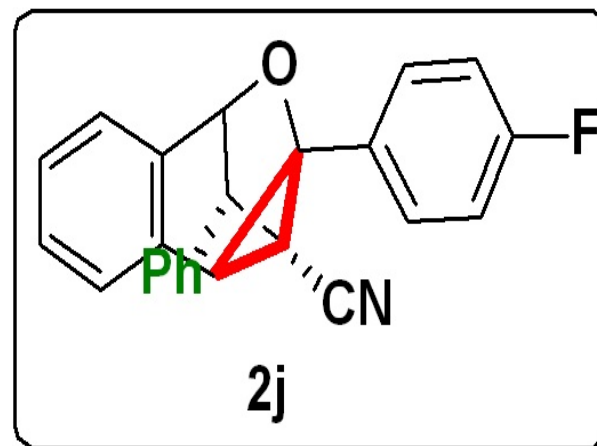

230 220 210 200 190 180 170 160 150 140 130 120 110 100 90 80 70 60 50 40 30 20 10 0 -10  
f1 (ppm)  
S75

MQZ-51  
 TPG-358  
 TPG-358  
 7.6251  
 7.6164  
 7.6059  
 7.5959  
 7.58748  
 7.5747  
 7.5746  
 7.5746  
 7.5744  
 7.5744  
 7.5744  
 7.5743  
 7.5732  
 7.5730  
 7.5730  
 7.5728  
 7.5728  
 7.5726  
 7.5713  
 7.5713  
 7.5711  
 7.5711  
 7.5710  
 7.5710  
 7.5709  
 7.5709  
 7.5708  
 7.5708  
 7.5707  
 7.5707  
 7.5688  
 7.5687  
 7.5686  
 7.5686  
 7.5685  
 7.5685  
 7.5683  
 7.5683  
 6.9137  
 6.8837  
 6.8736  
 6.8686  
 6.8686  
 6.8585  
 6.8585

4.22  
 4.21  
 3.56  
 2.96  
 2.89  
 2.39  
 2.17  
 1.55  
 1.26  
 0.88  
 0.01  
 -0.00  
 -0.01

Solvent CDCl<sub>3</sub>  
 Spectrometer Frequency 400.40

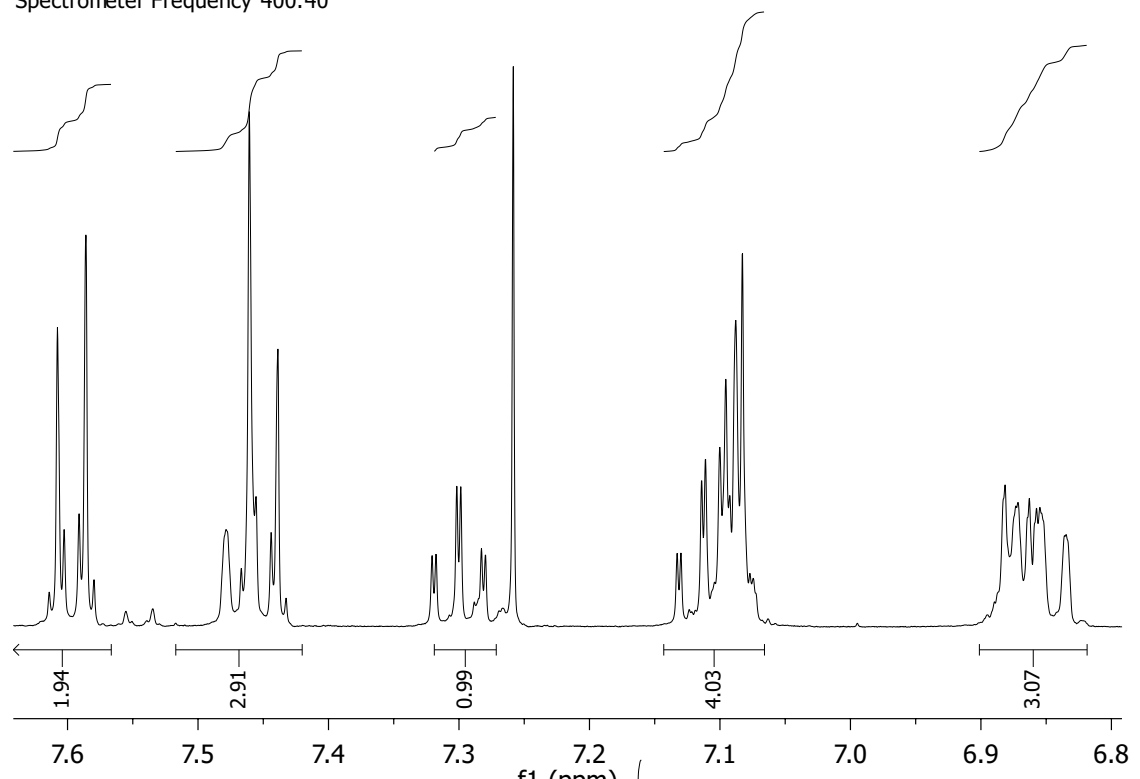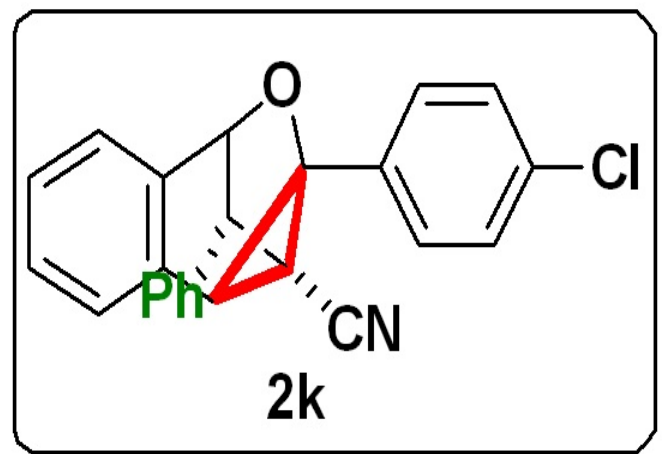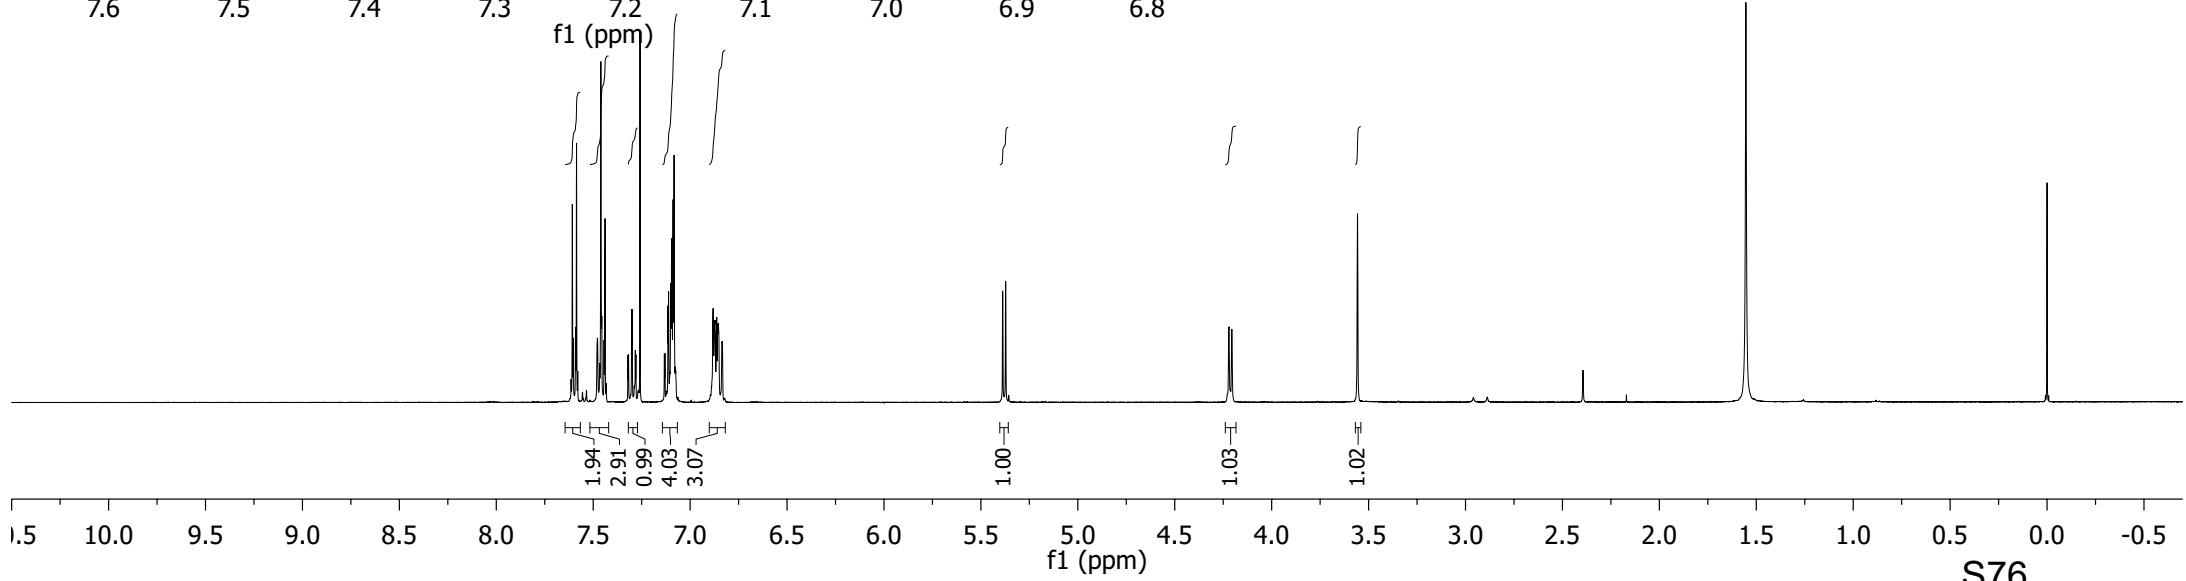

M0254-8  
TPG-358  
Solvent  
Spectrometer Frequency 100.69

M0254-8  
TPG-358

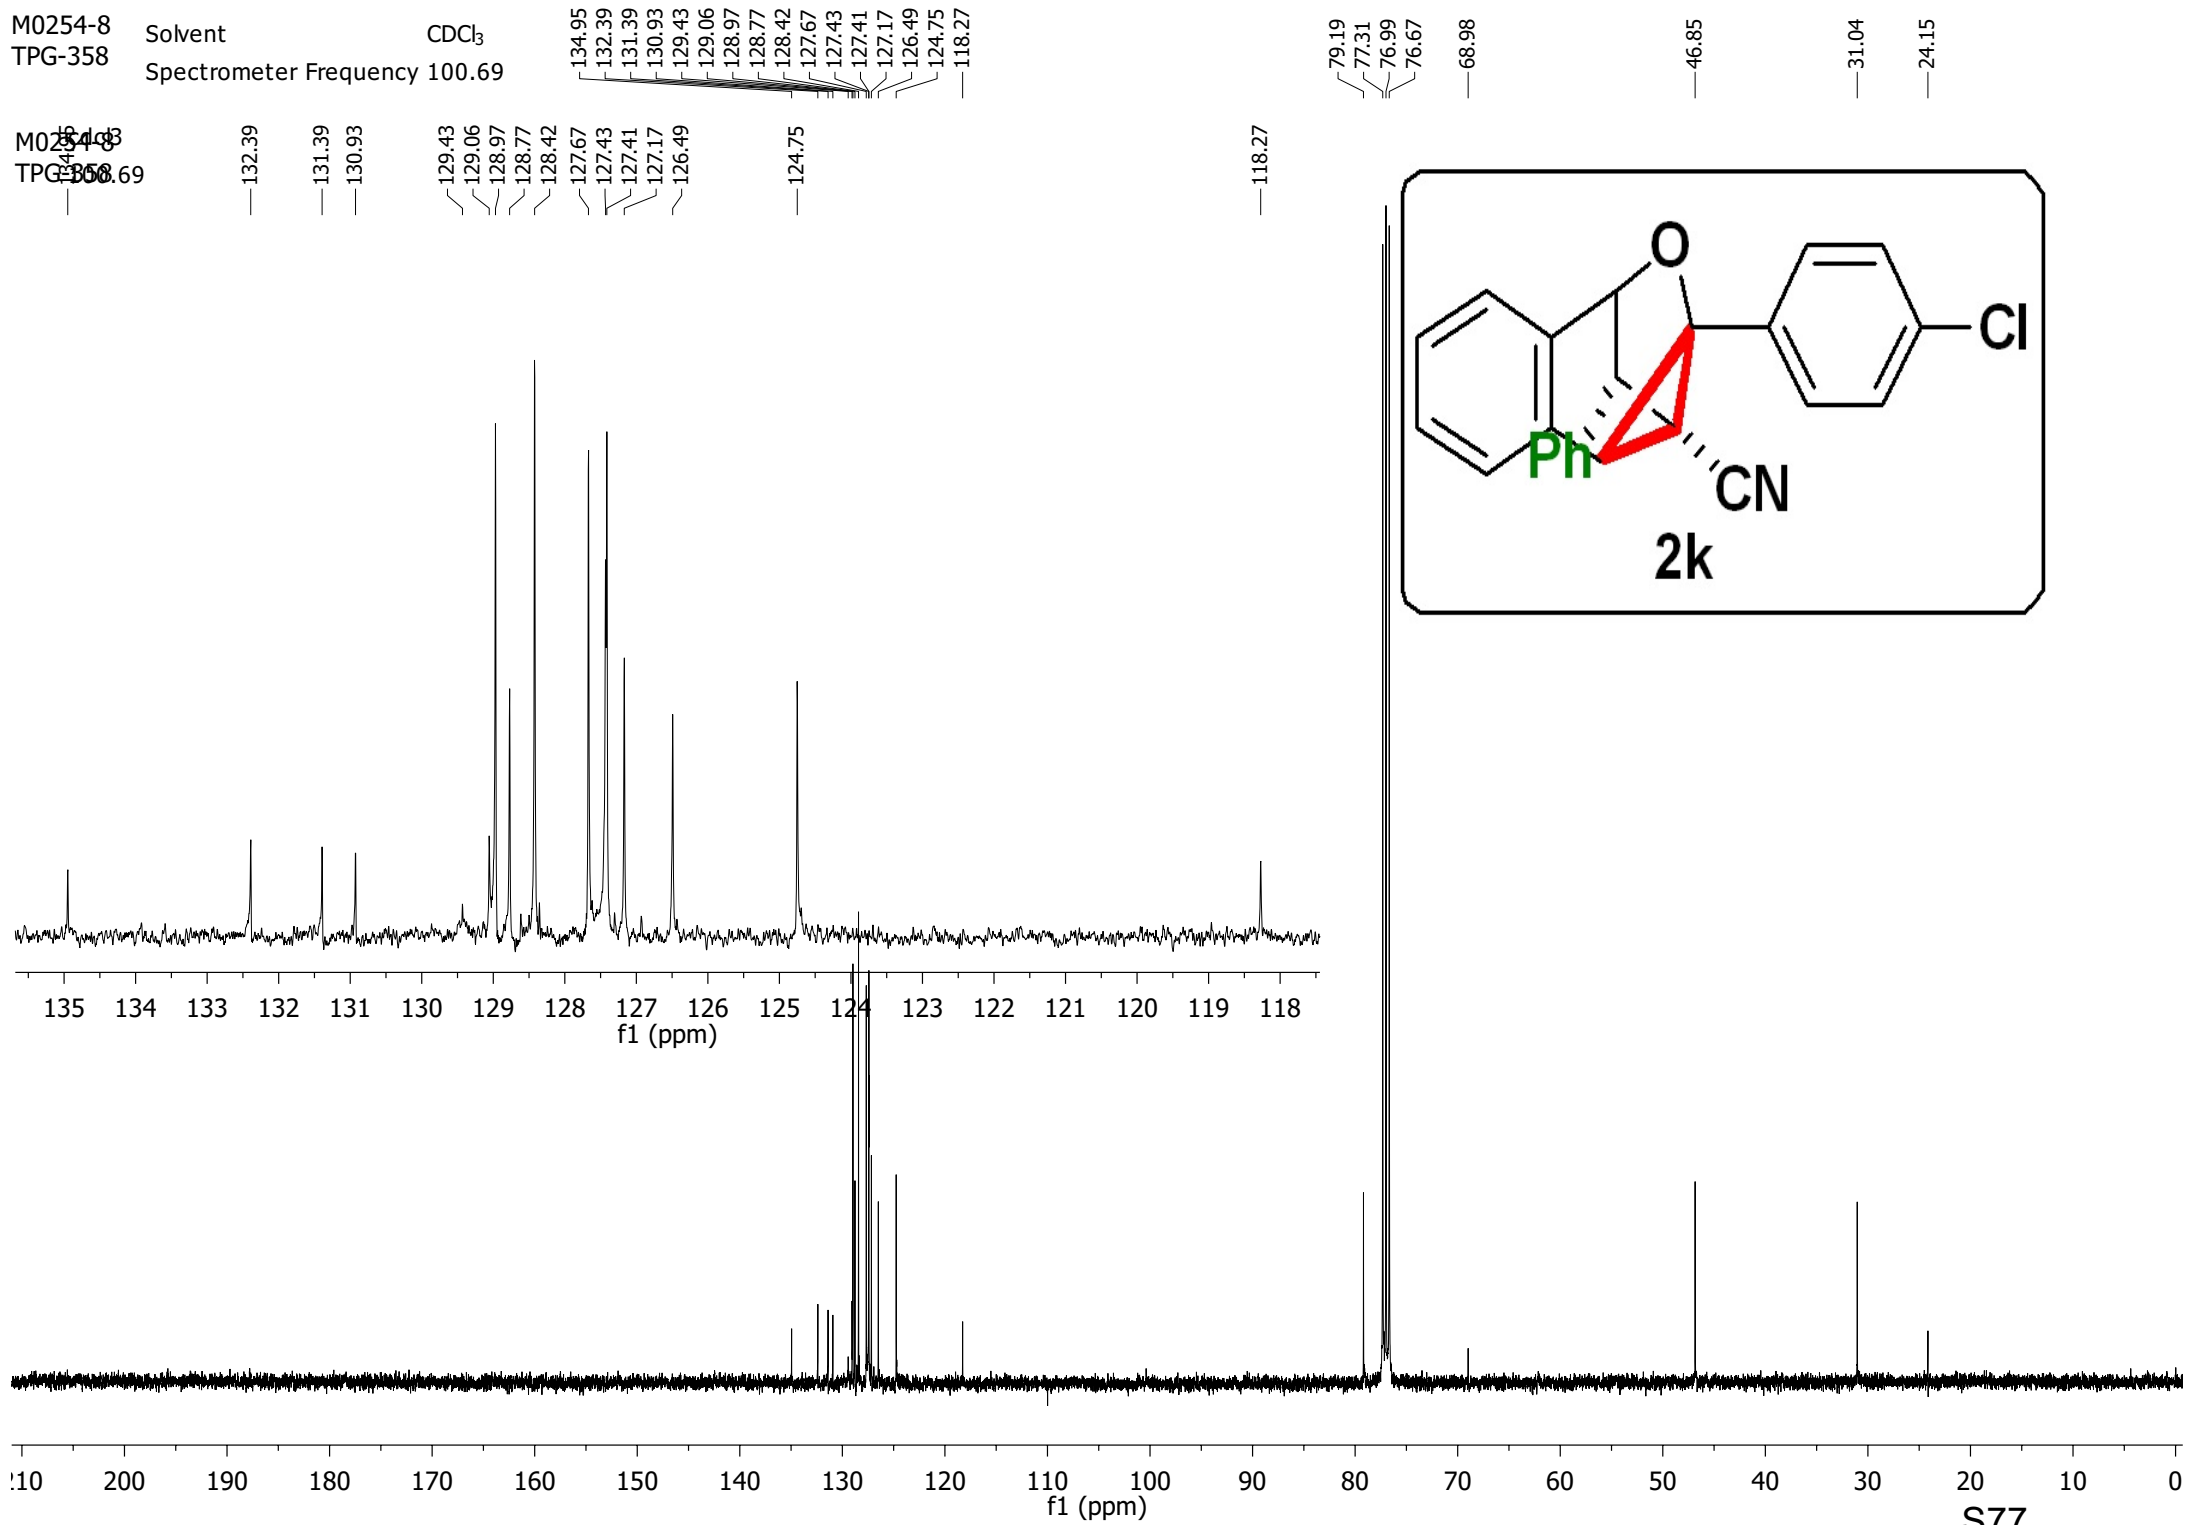

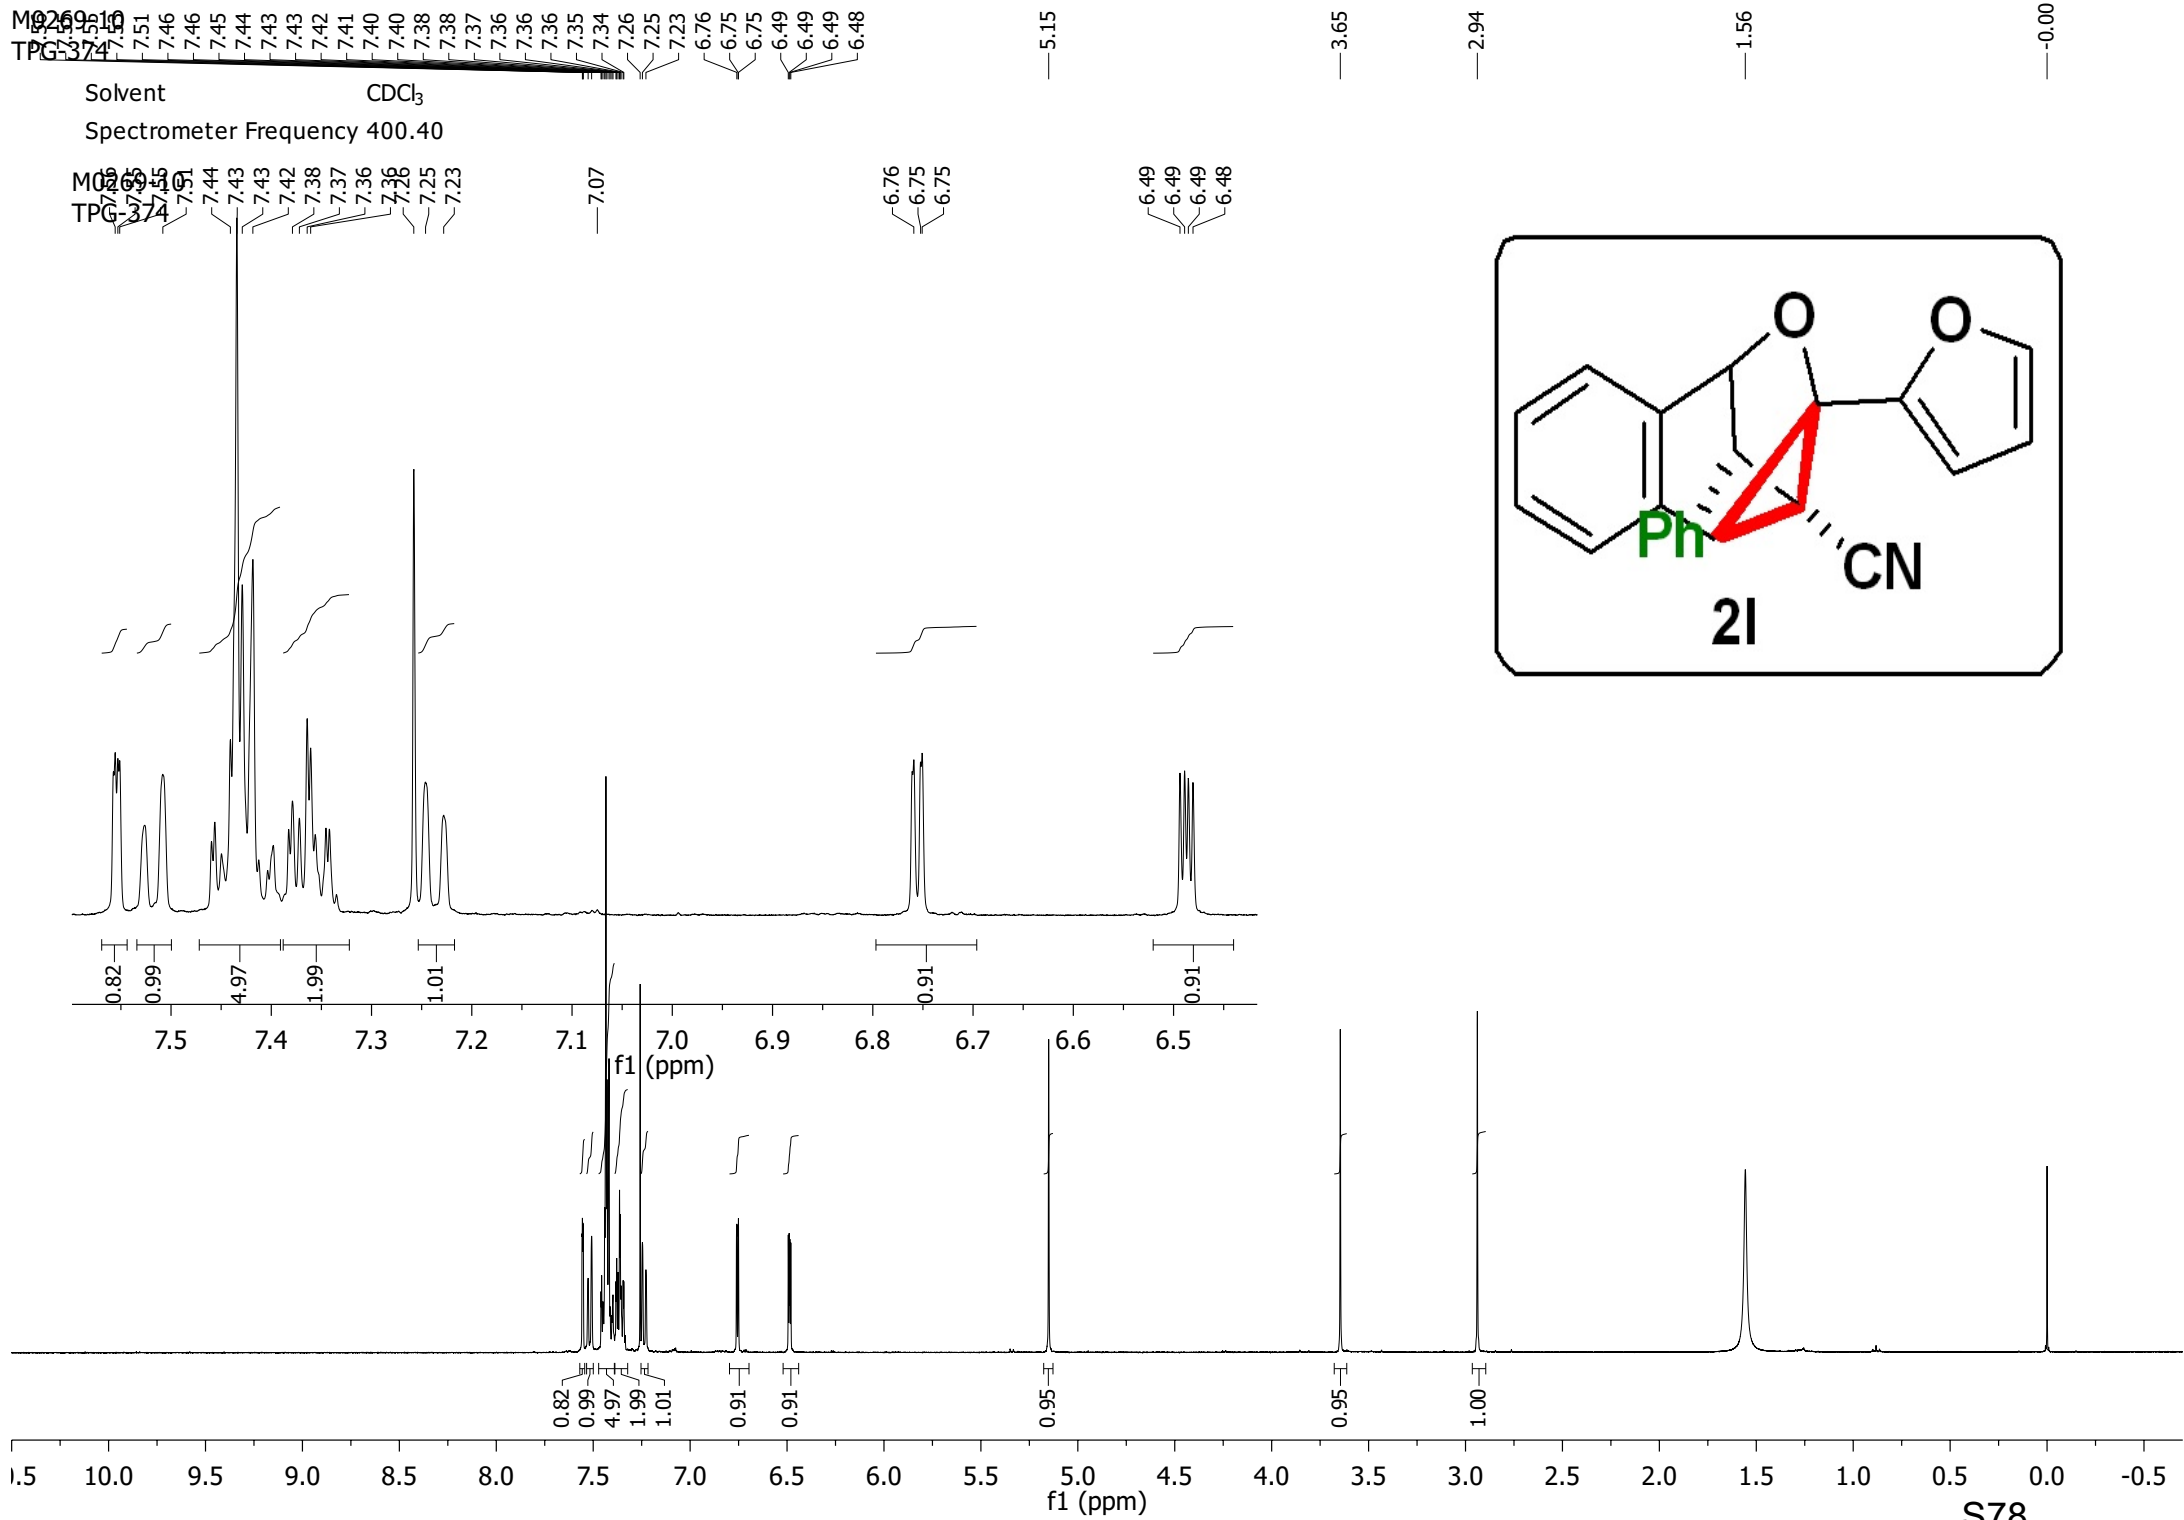

M0269-11  
TPG-374

Solvent  $\text{CDCl}_3$   
Spectrometer Frequency 100.69

M0269-11  
TPG-374

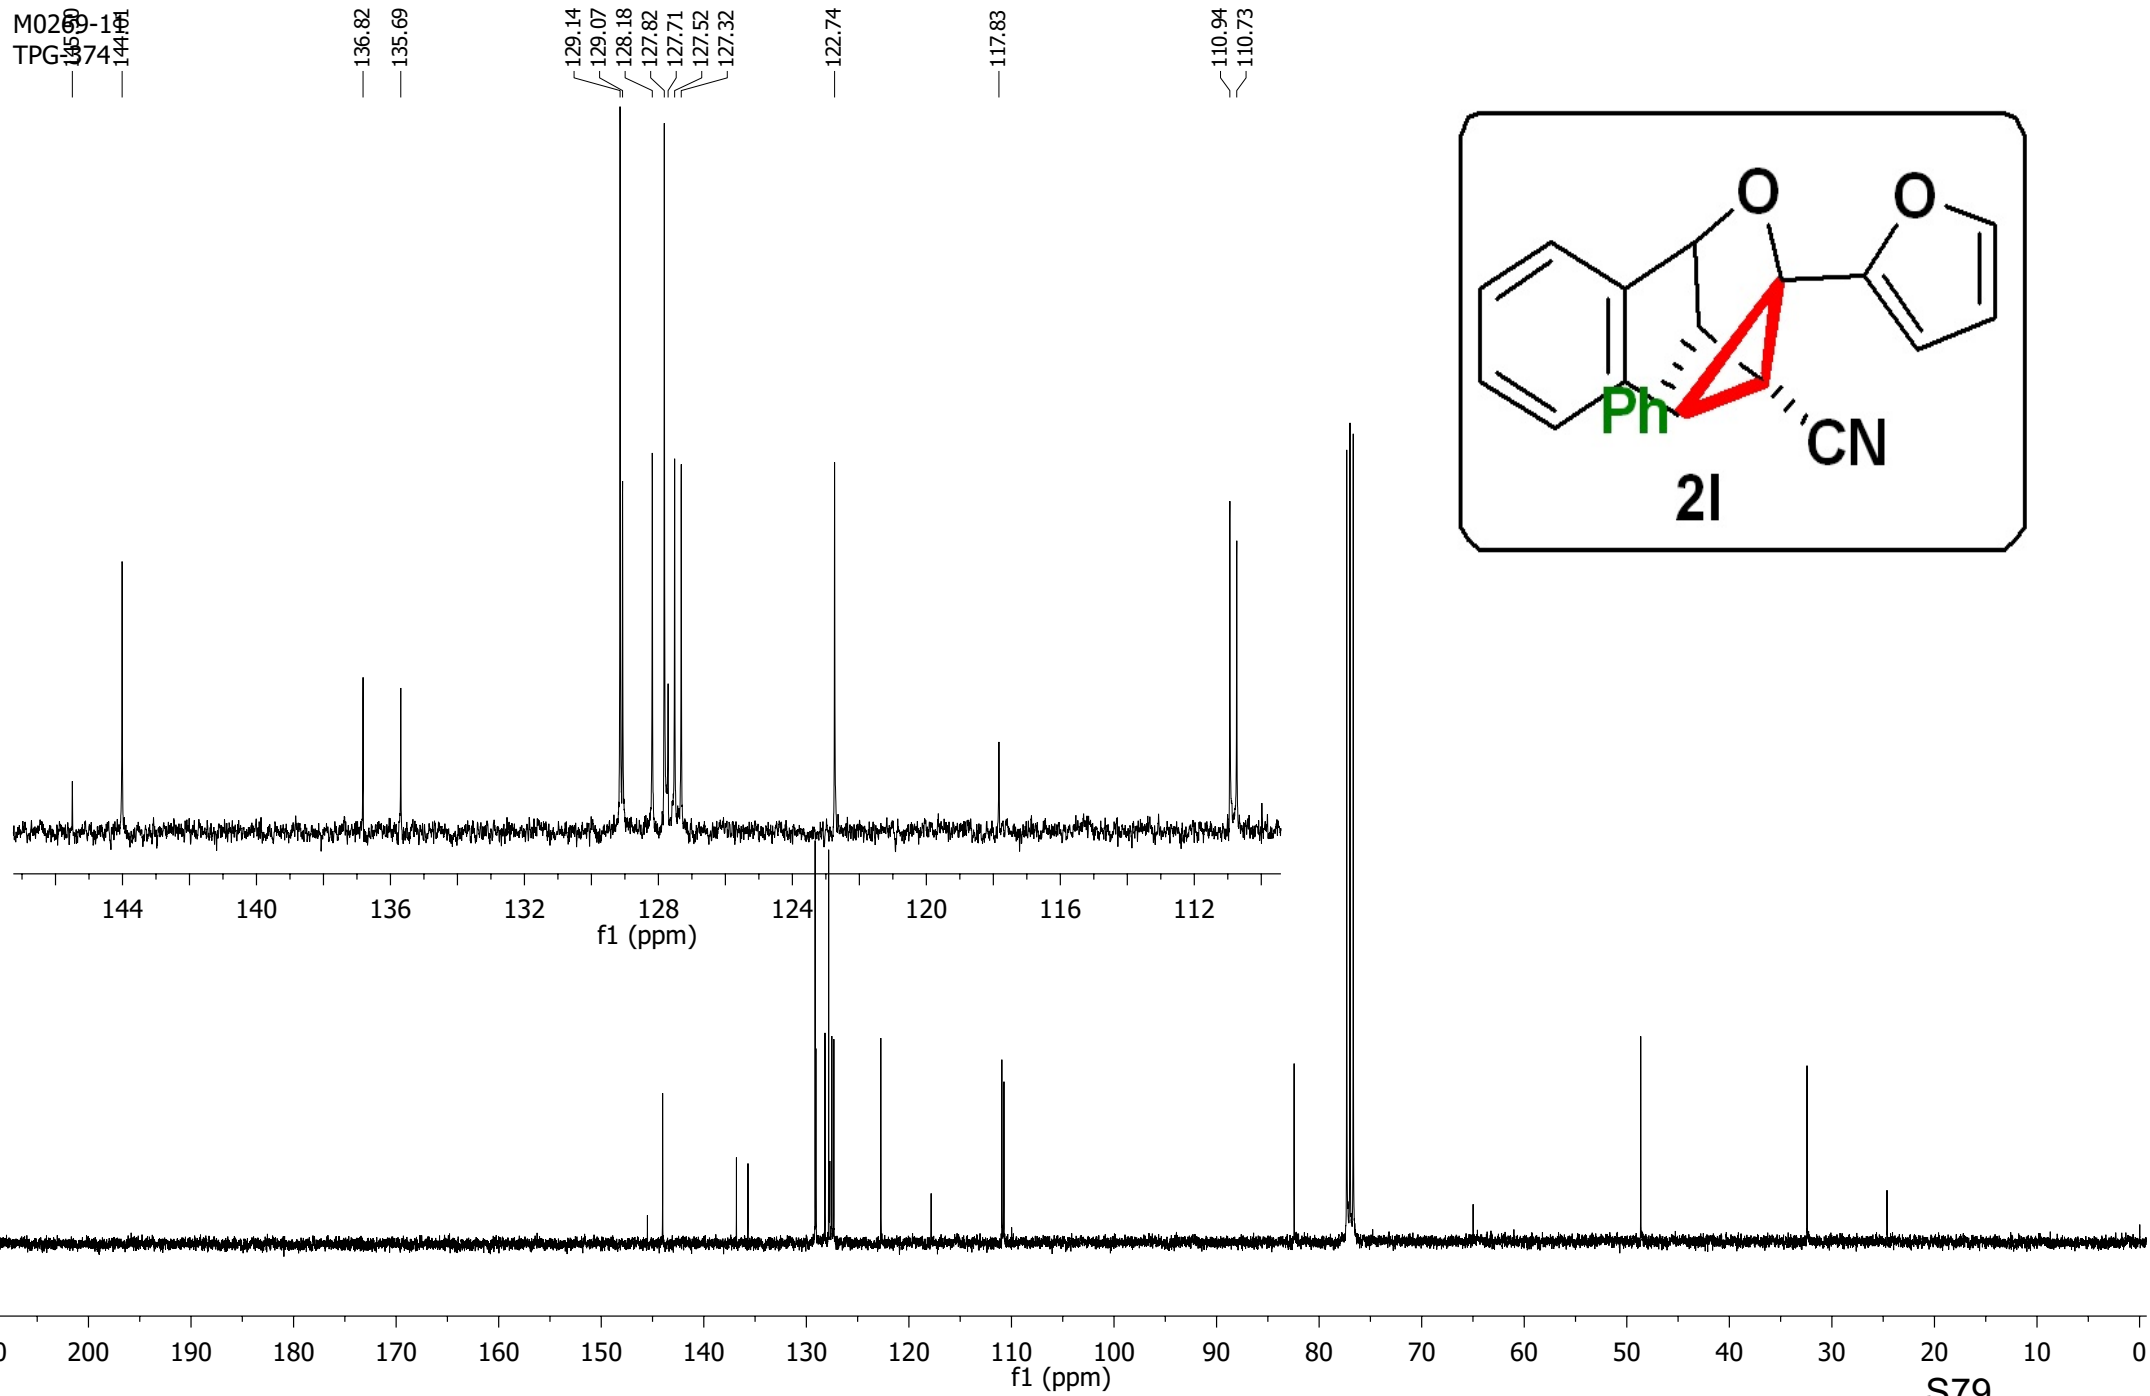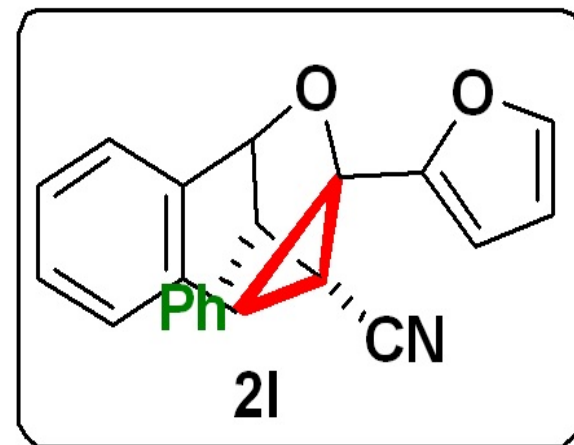

MW 269.4  
TPG 373

Solvent  $\text{CDCl}_3$   
Spectrometer Frequency 400.40

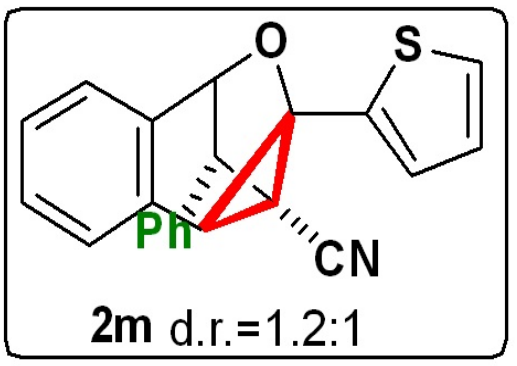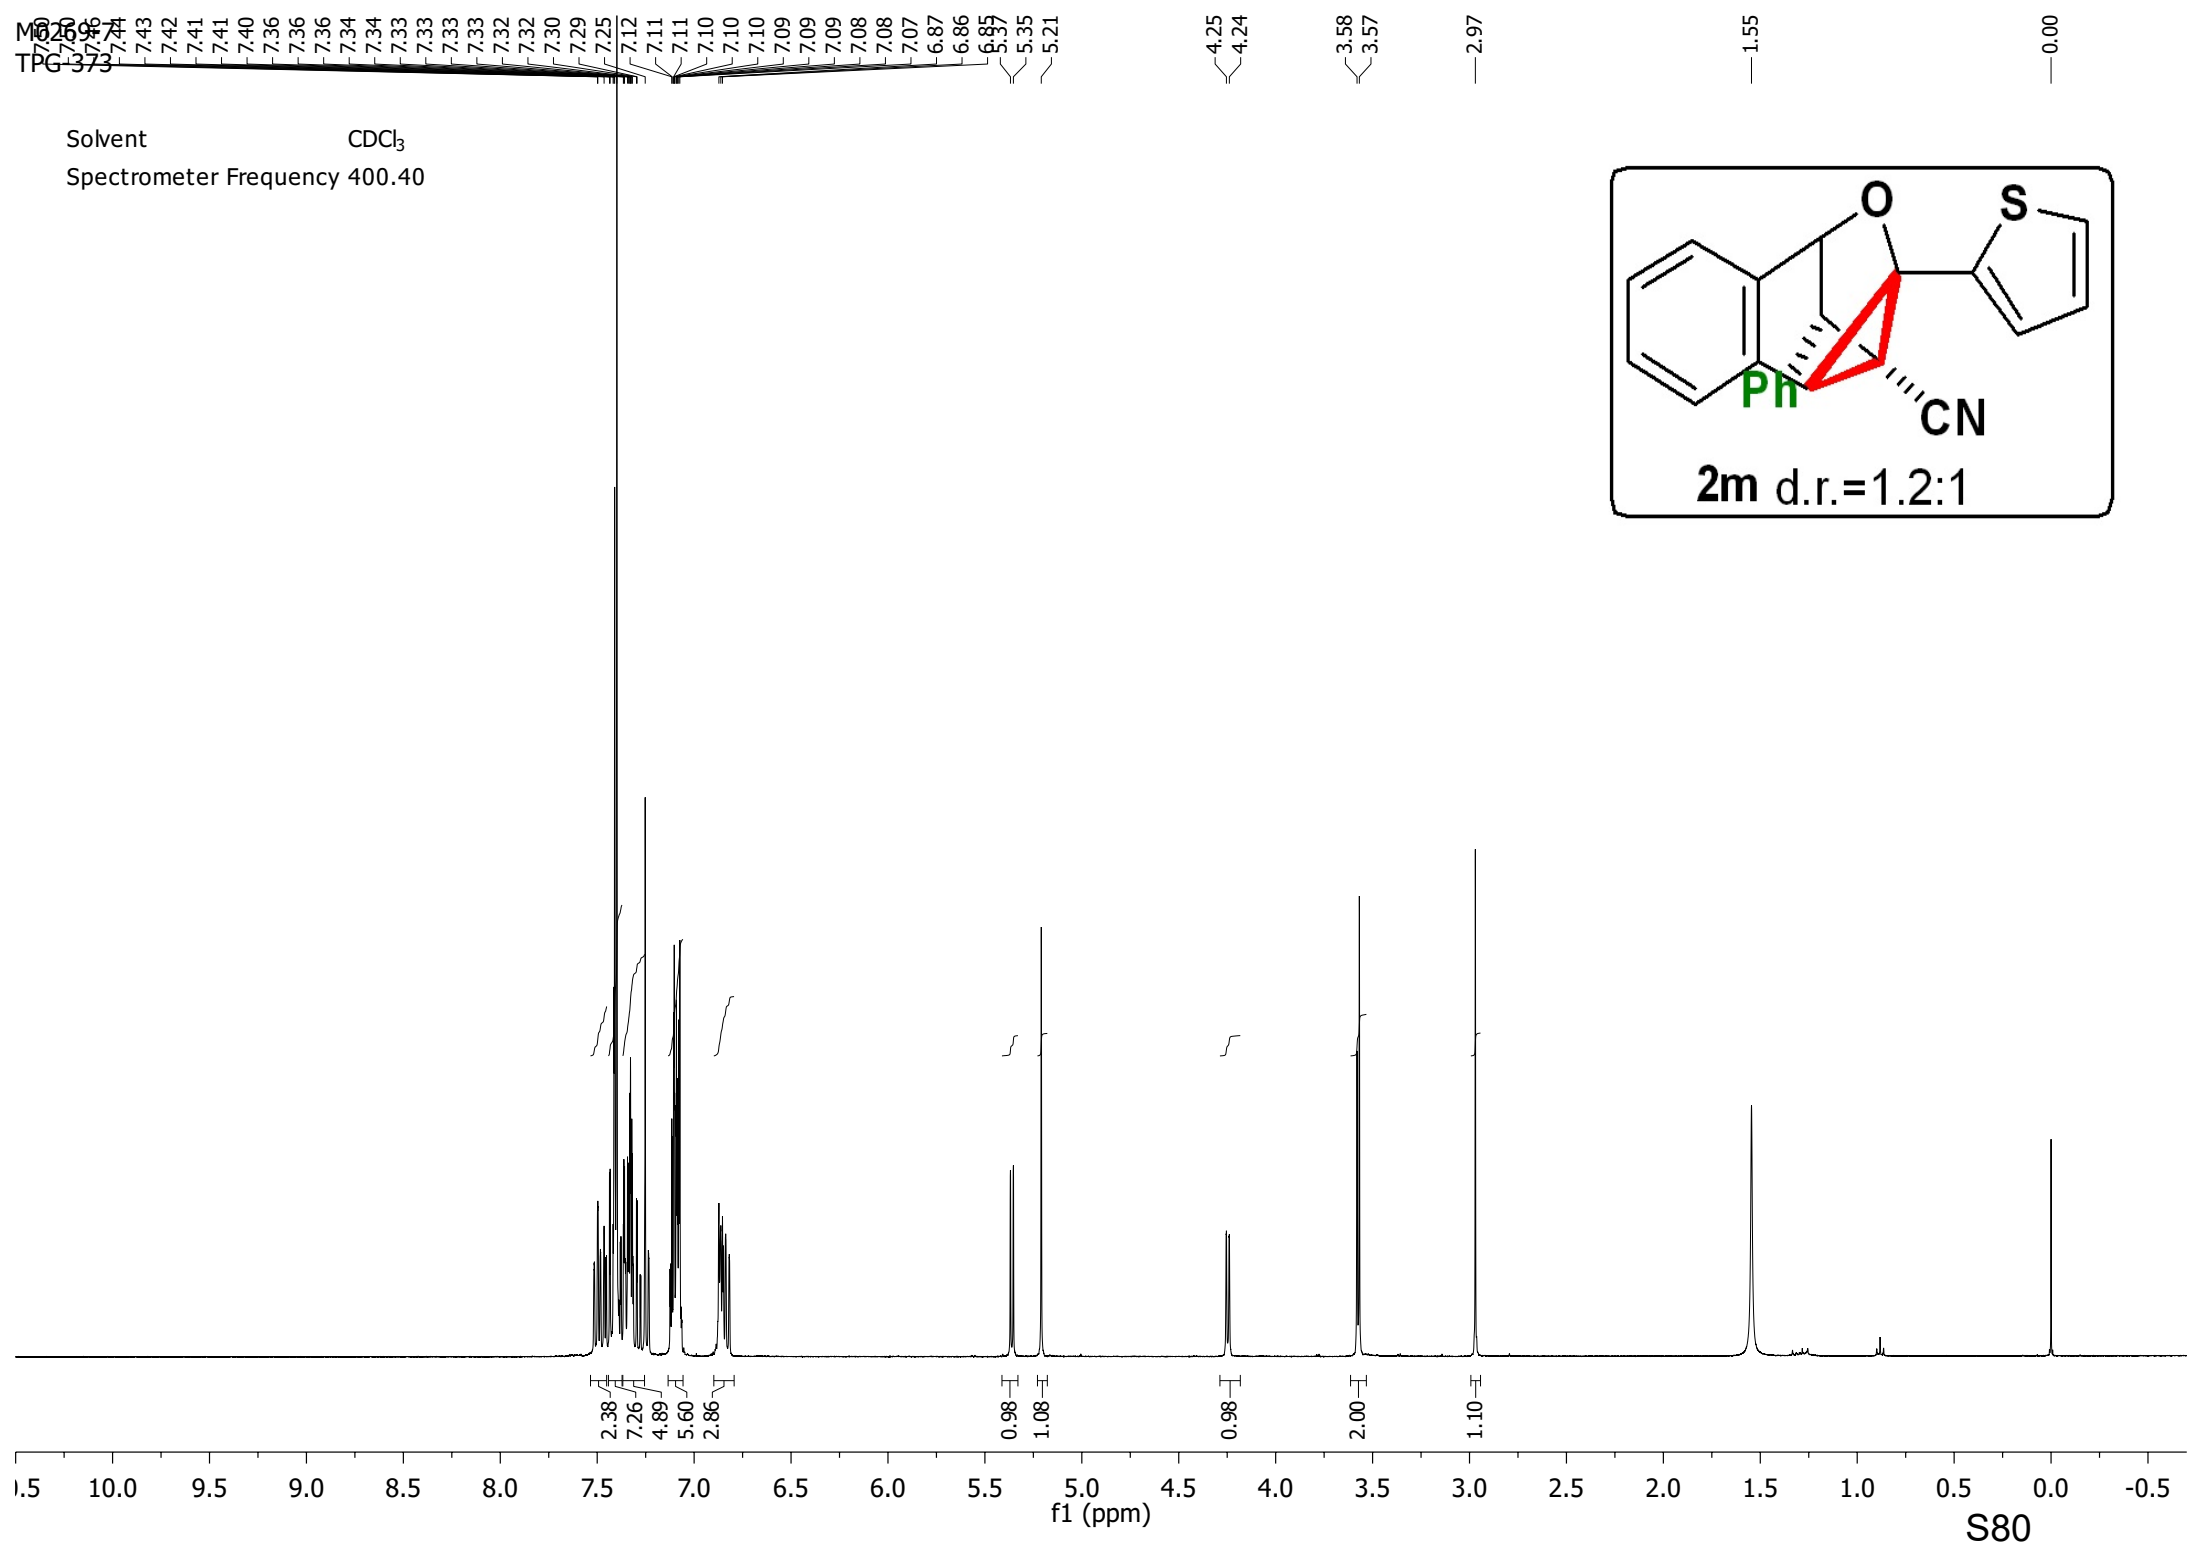



M0269-8  
TPG-373

Solvent  $\text{CDCl}_3$   
Spectrometer Frequency 100.69

136.81  
135.63  
134.94  
134.53  
132.41  
131.31  
129.14  
129.05  
128.90  
128.76  
128.40  
128.17  
127.84  
127.44  
127.40  
127.34  
127.30  
127.20  
127.17  
126.86  
126.78  
126.52  
125.86  
125.83  
124.82  
122.74  
118.28  
117.85

82.52  
79.42  
77.31  
76.99  
76.68  
67.38  
67.03

48.85  
46.56  
34.73  
32.05  
26.95  
24.84

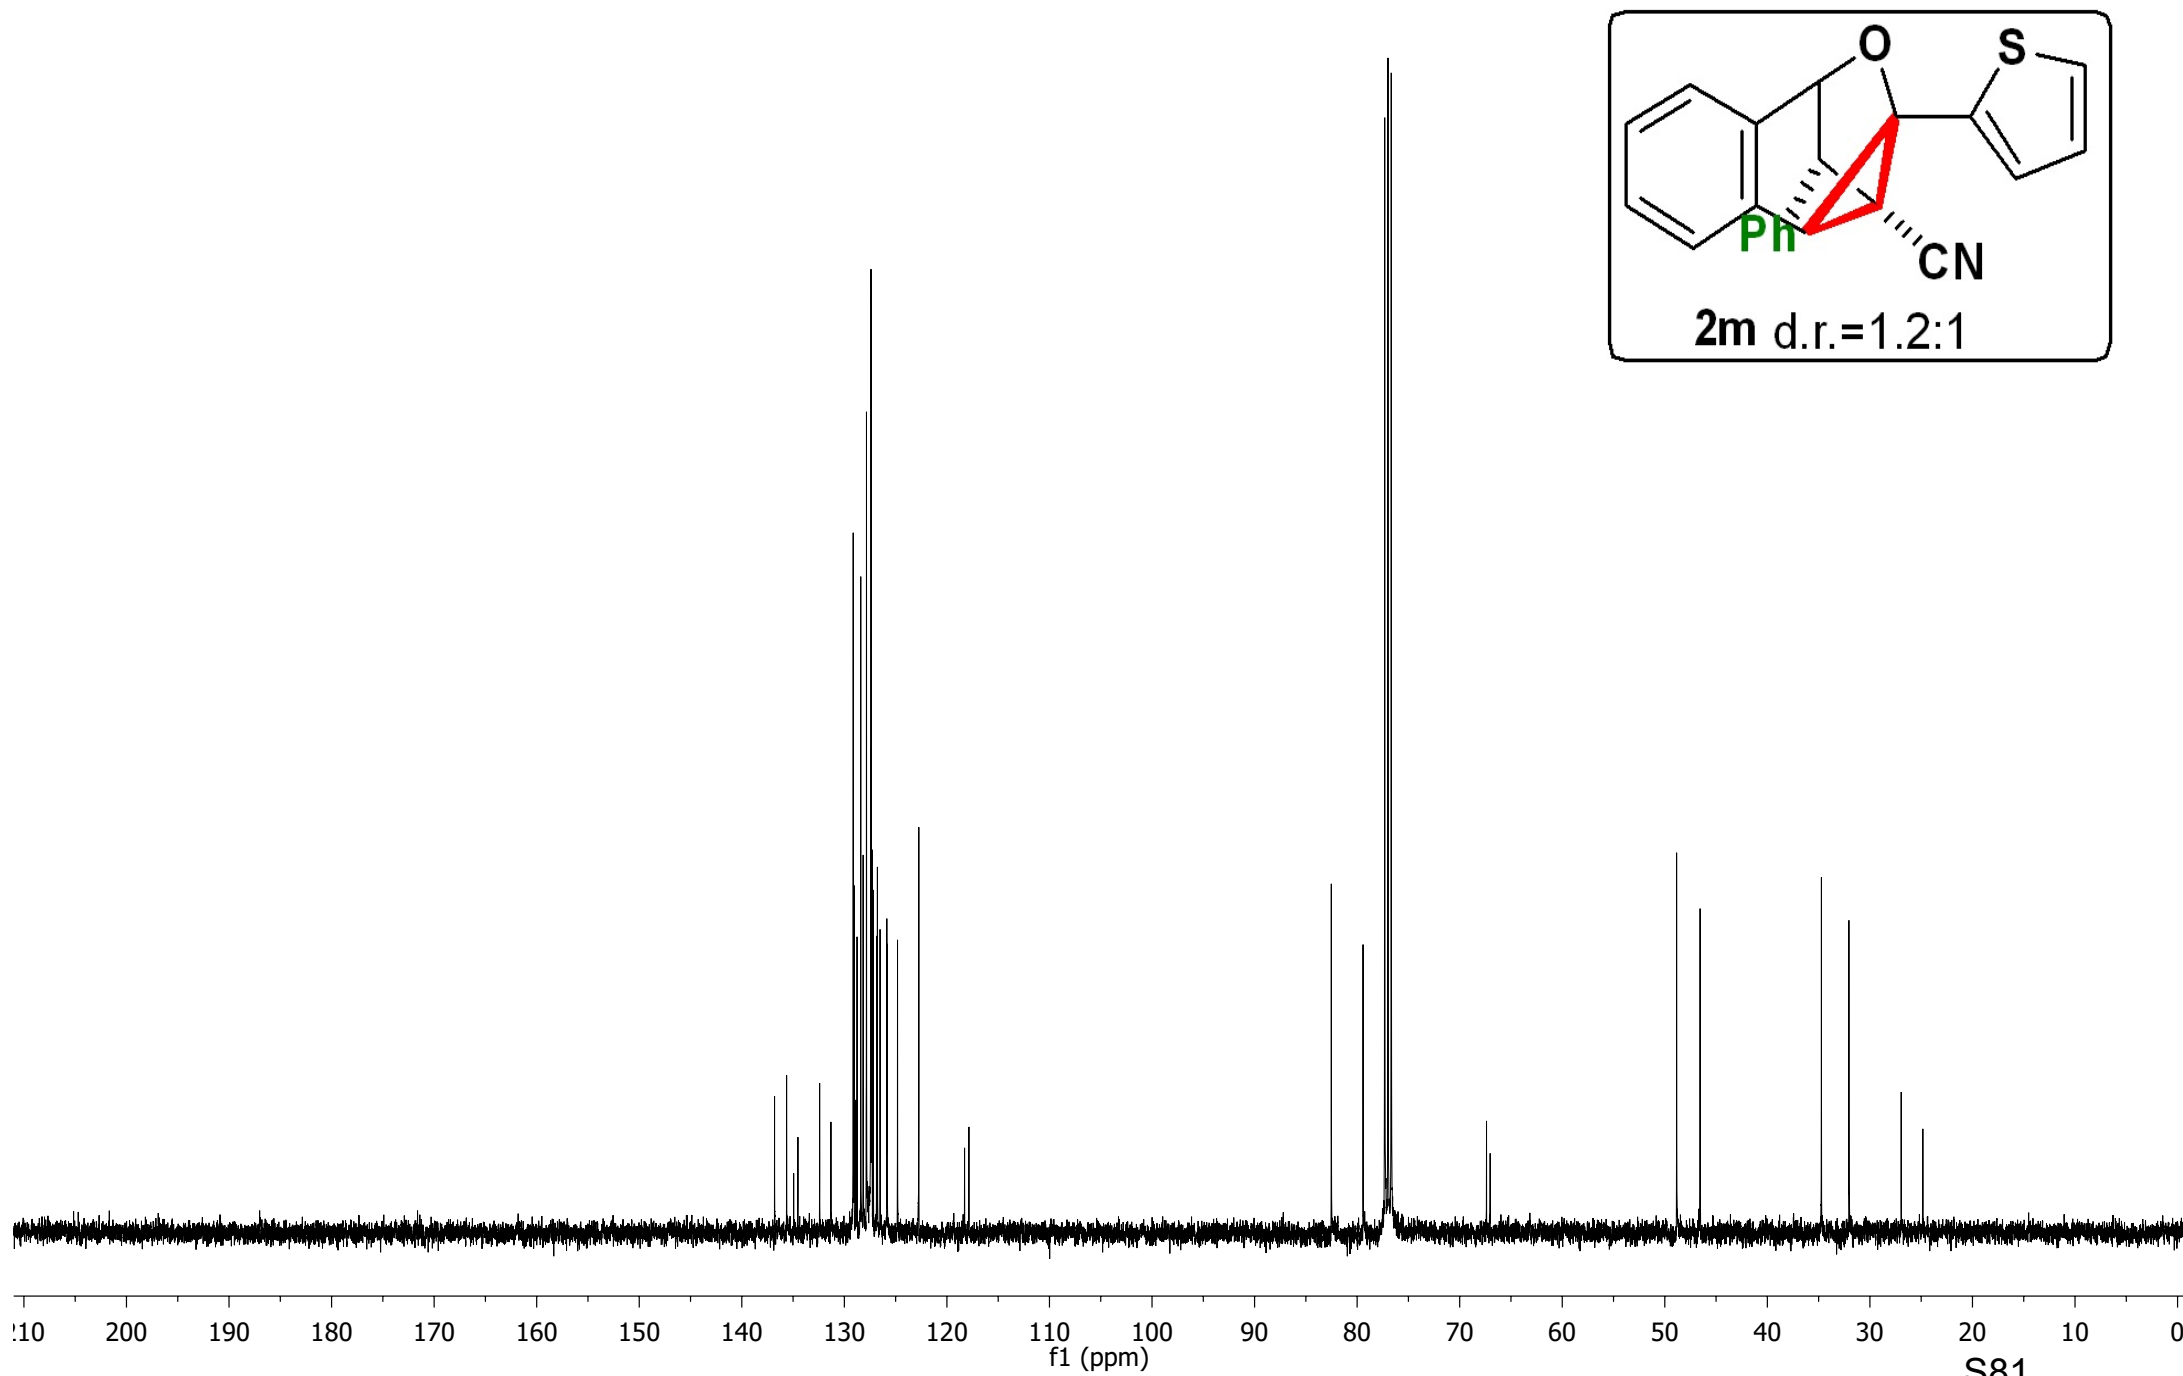

M0269-13  
TPG-375

Solvent  $\text{CDCl}_3$   
Spectrometer Frequency 400.40

M0269-13  
TPG-375

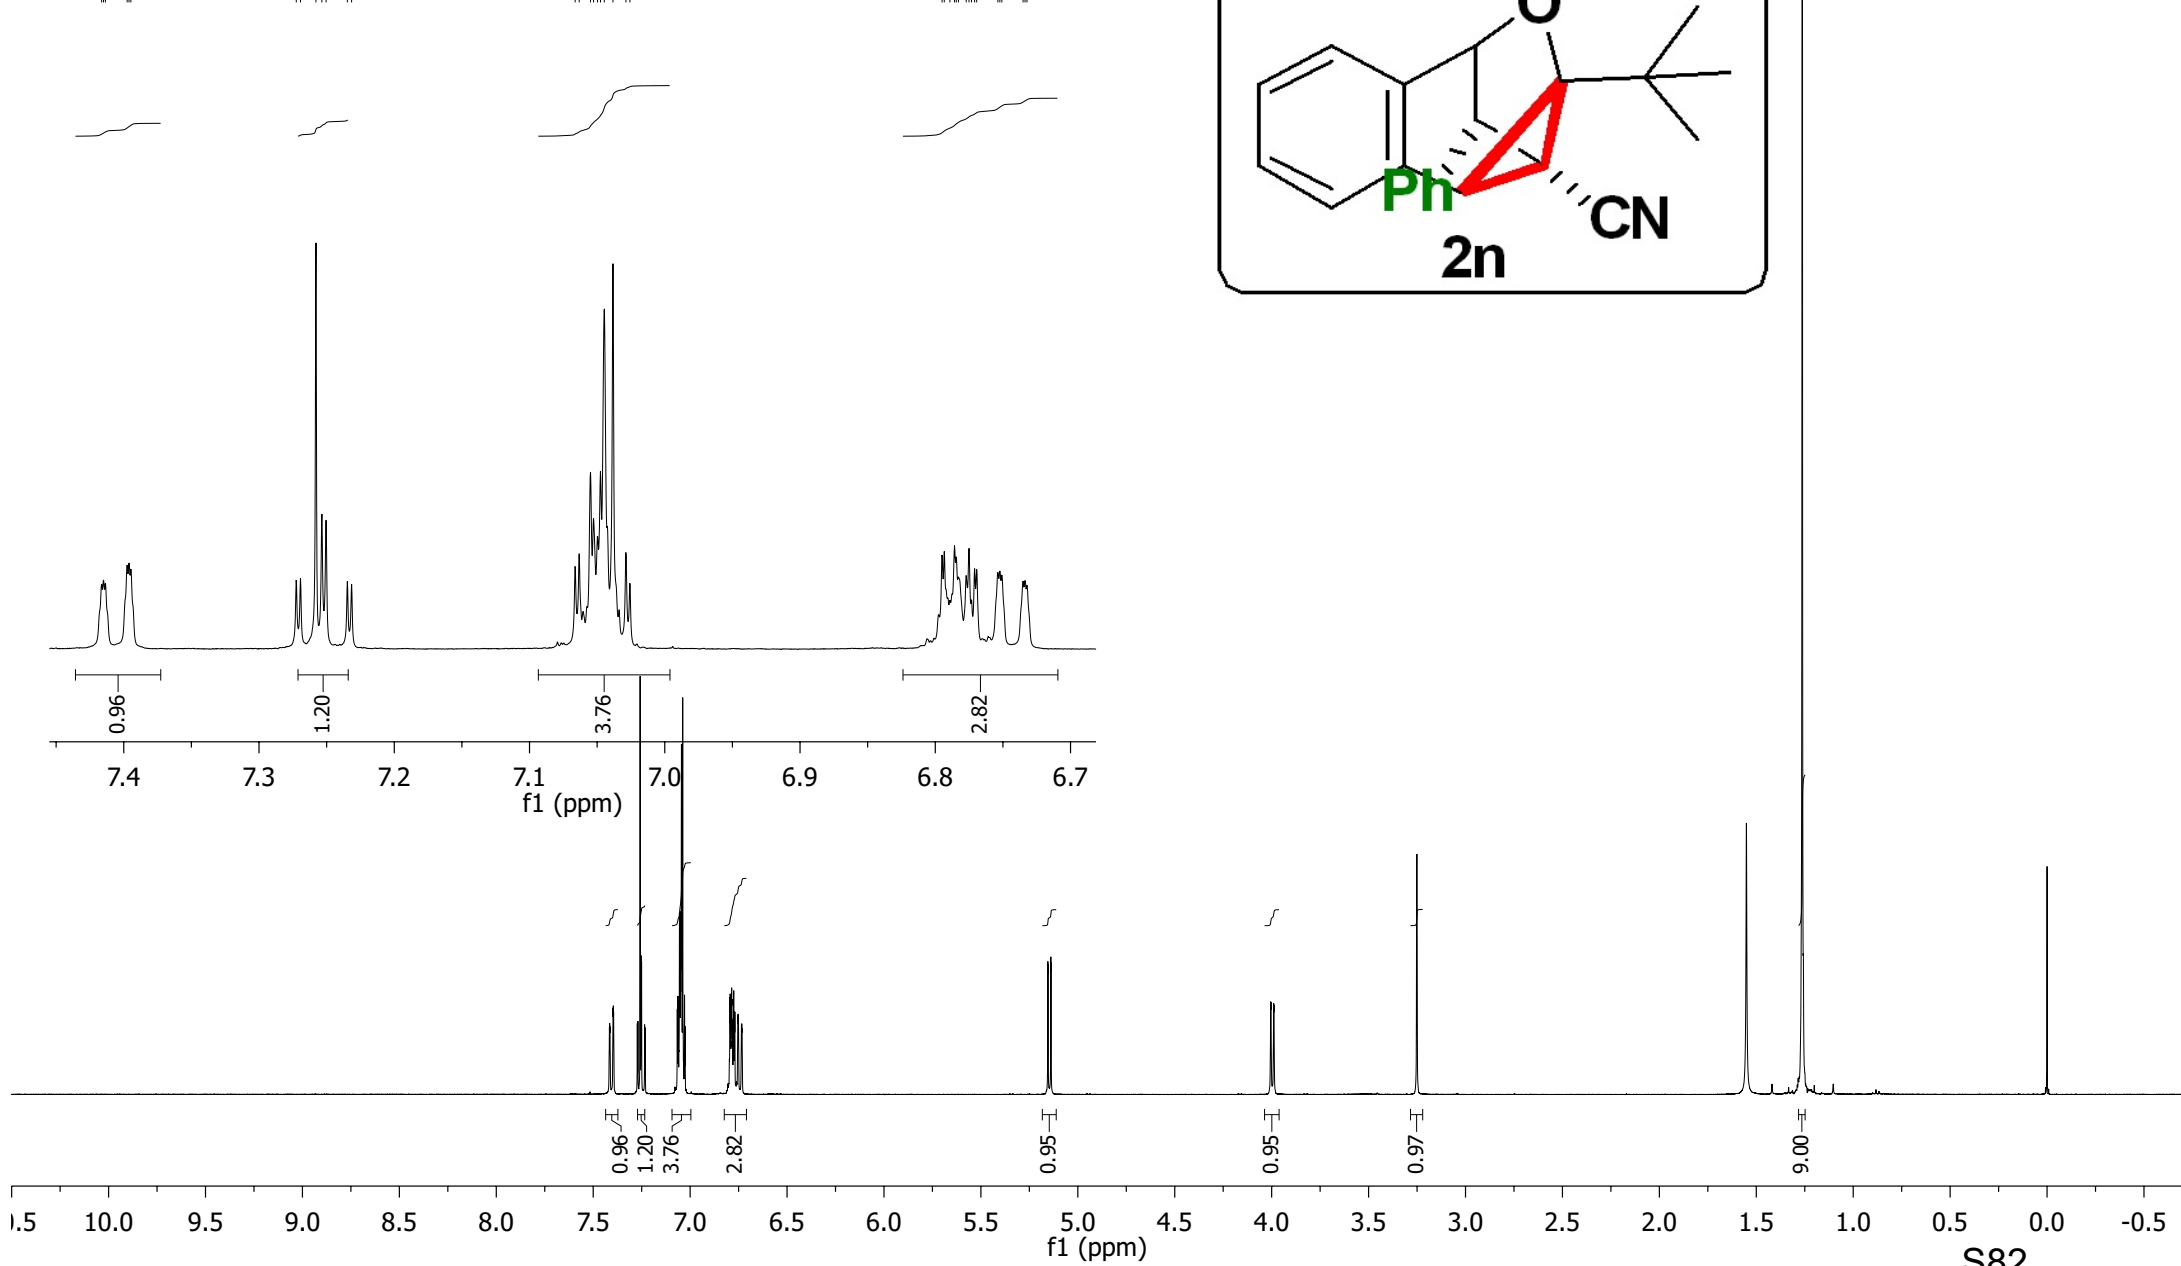

M0269-14  
TPG-375  
Solvent  $\text{CDCl}_3$   
Spectrometer Frequency 100.69

132.86  
131.83  
130.36  
128.34  
128.22  
127.43  
127.15  
126.55  
126.08  
124.50  
119.75

78.23  
77.31  
77.19  
76.99  
76.67  
75.07

47.49

32.34  
27.61  
26.74

18.88

M0269-14  
TPG-375  
131.83  
130.36  
128.34  
128.22  
127.43  
127.15  
126.55  
126.08  
124.50  
119.75

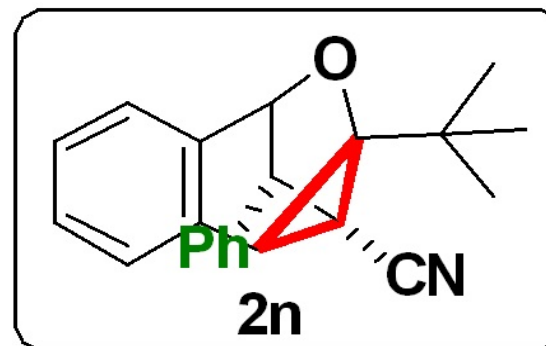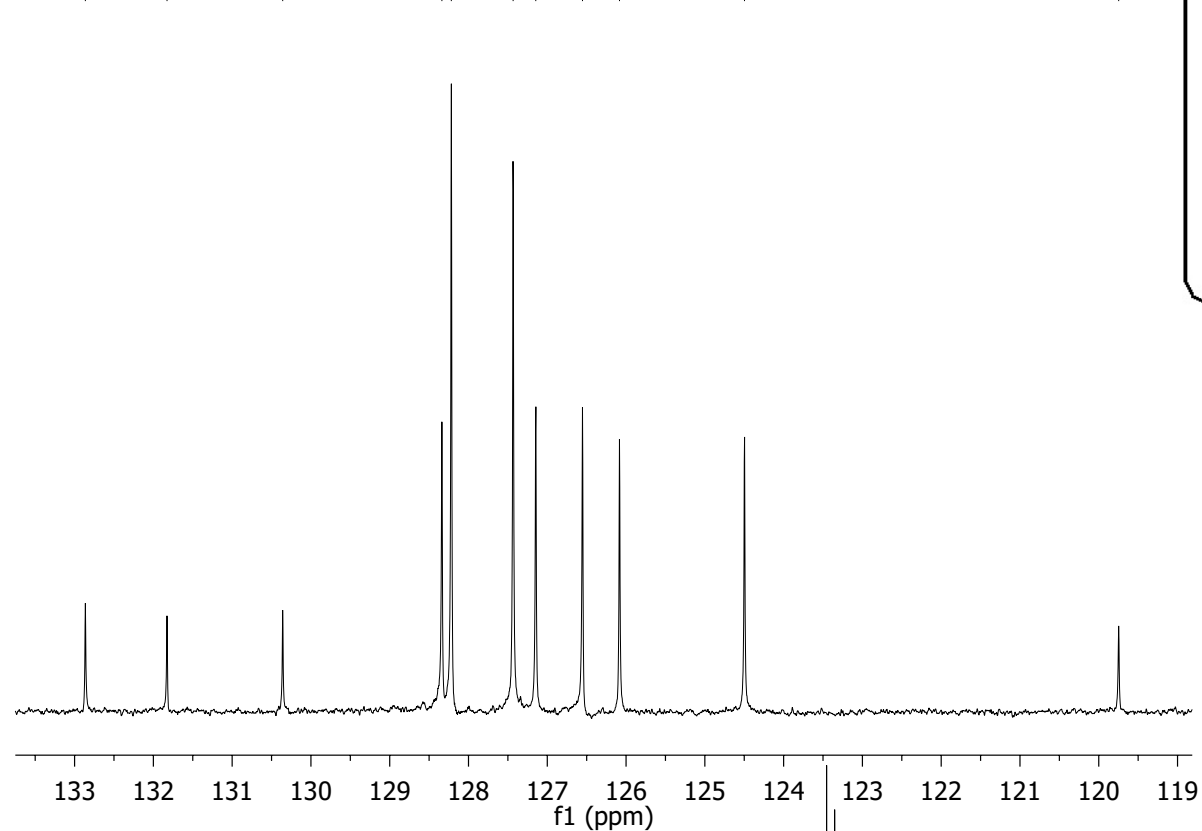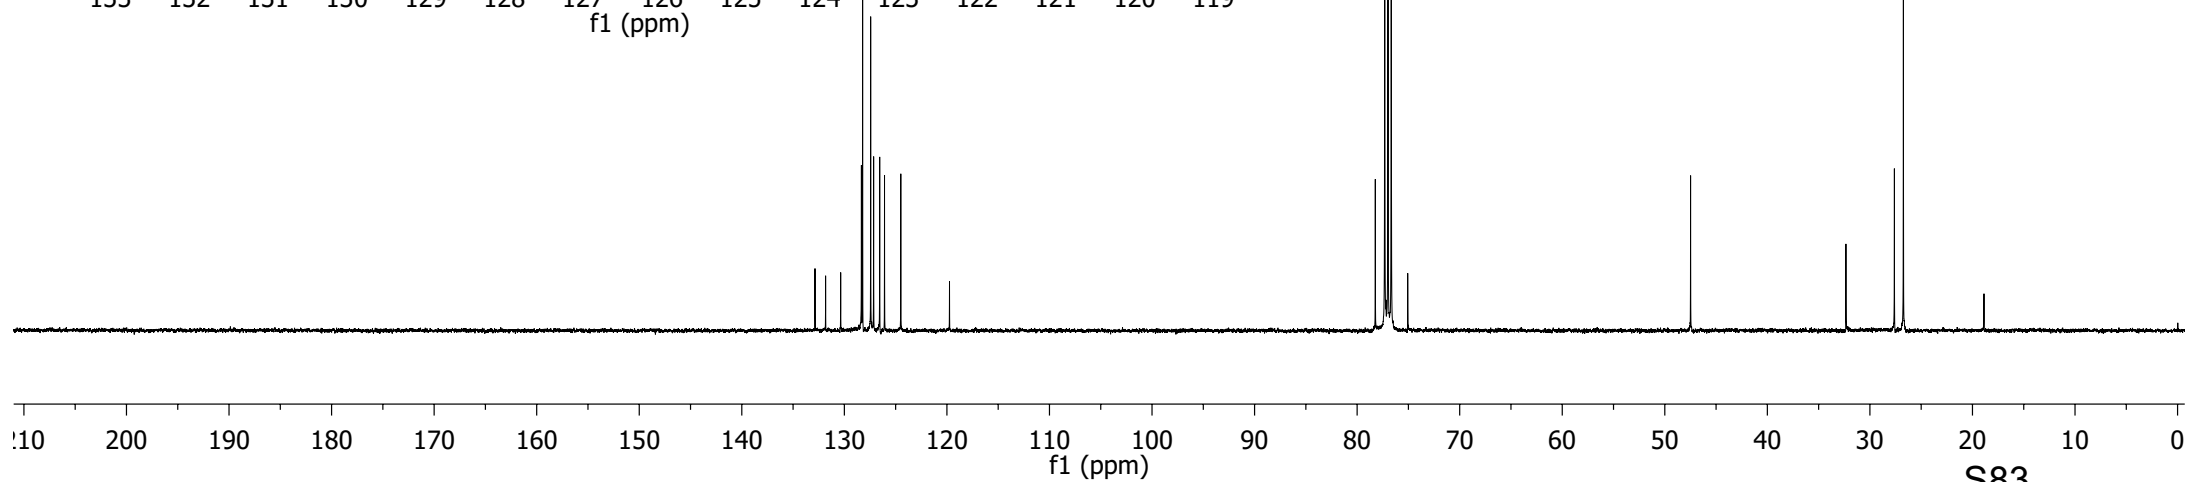

M025719  
TPG-362

Solvent  $\text{CDCl}_3$   
Spectrometer Frequency 400.40

M025719  
TPG-362

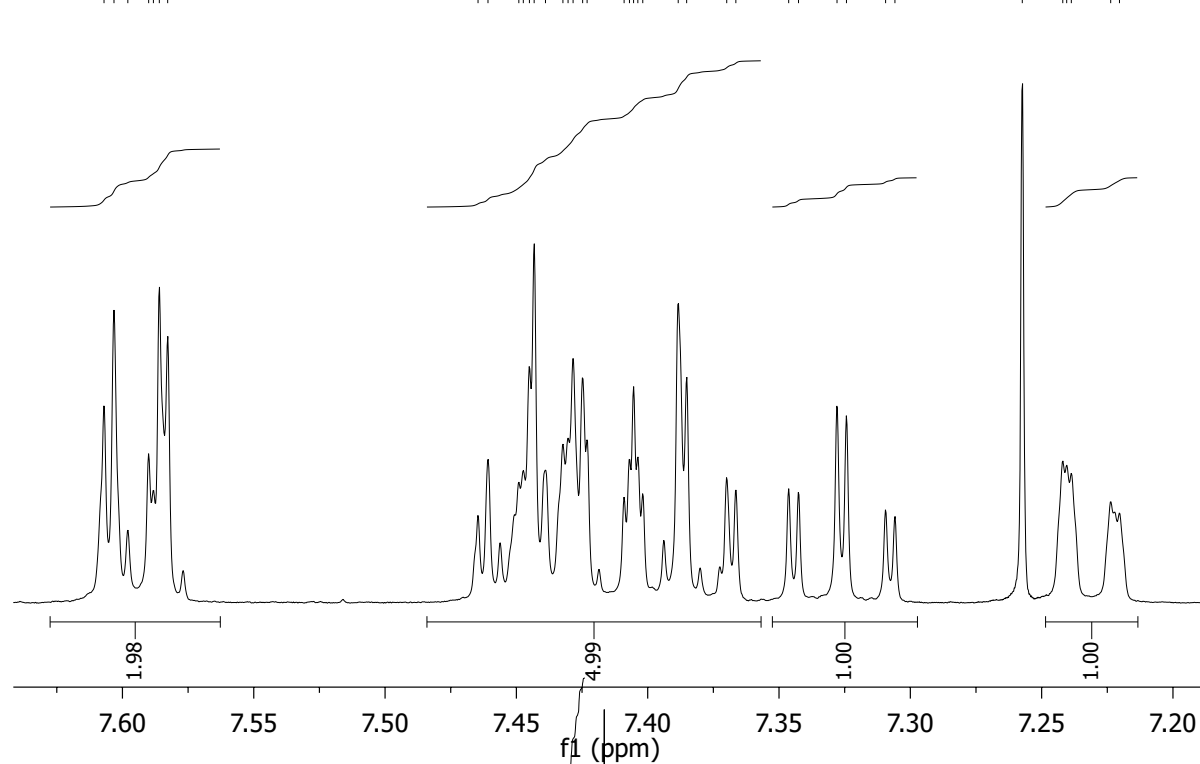

3.41 2.67 2.66 2.65 2.65 2.64 2.63 2.62 2.62 1.74 1.71 1.56 0.00

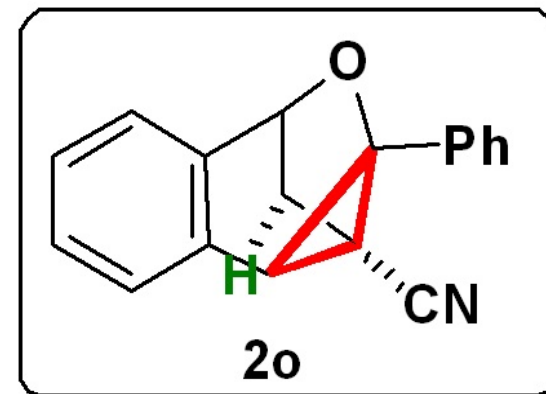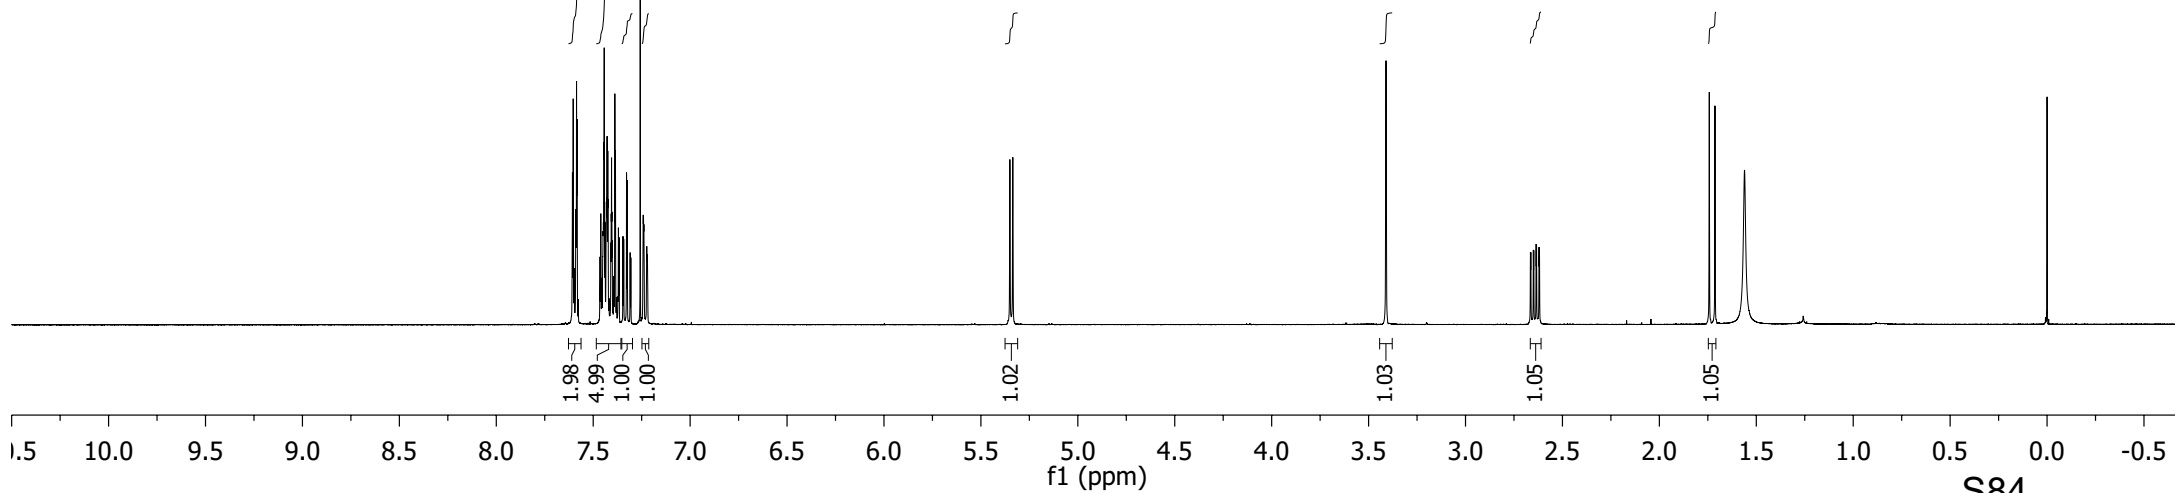

M0257-11  
TPG-362 Solvent  $\text{CDCl}_3$   
Spectrometer Frequency 100.69

M0257-11  
TPG-362

132.22

128.77  
128.73  
128.65  
128.16

127.25  
127.00  
126.29

134.98  
132.22  
128.77  
128.73  
128.65  
128.16  
127.25  
127.00  
126.29  
122.57  
118.95

122.57

118.95

77.31  
76.99  
76.67  
75.09  
68.87

31.70  
31.06

19.26

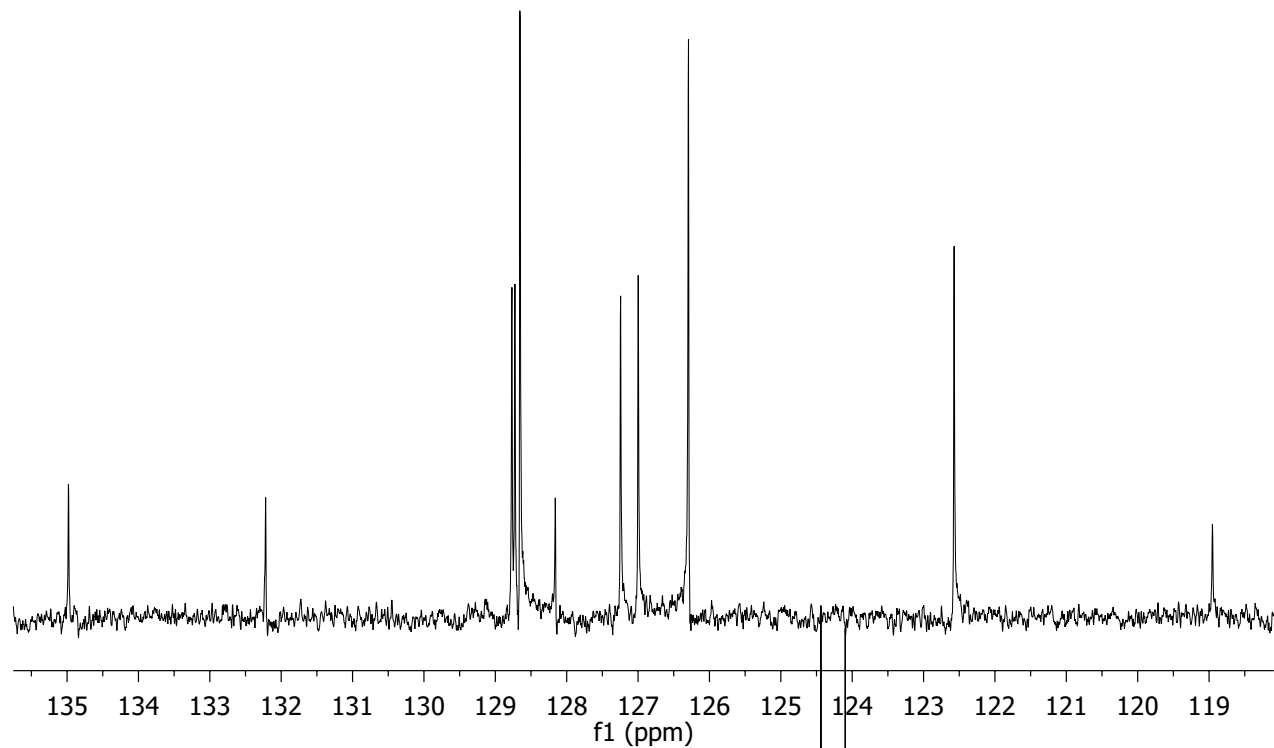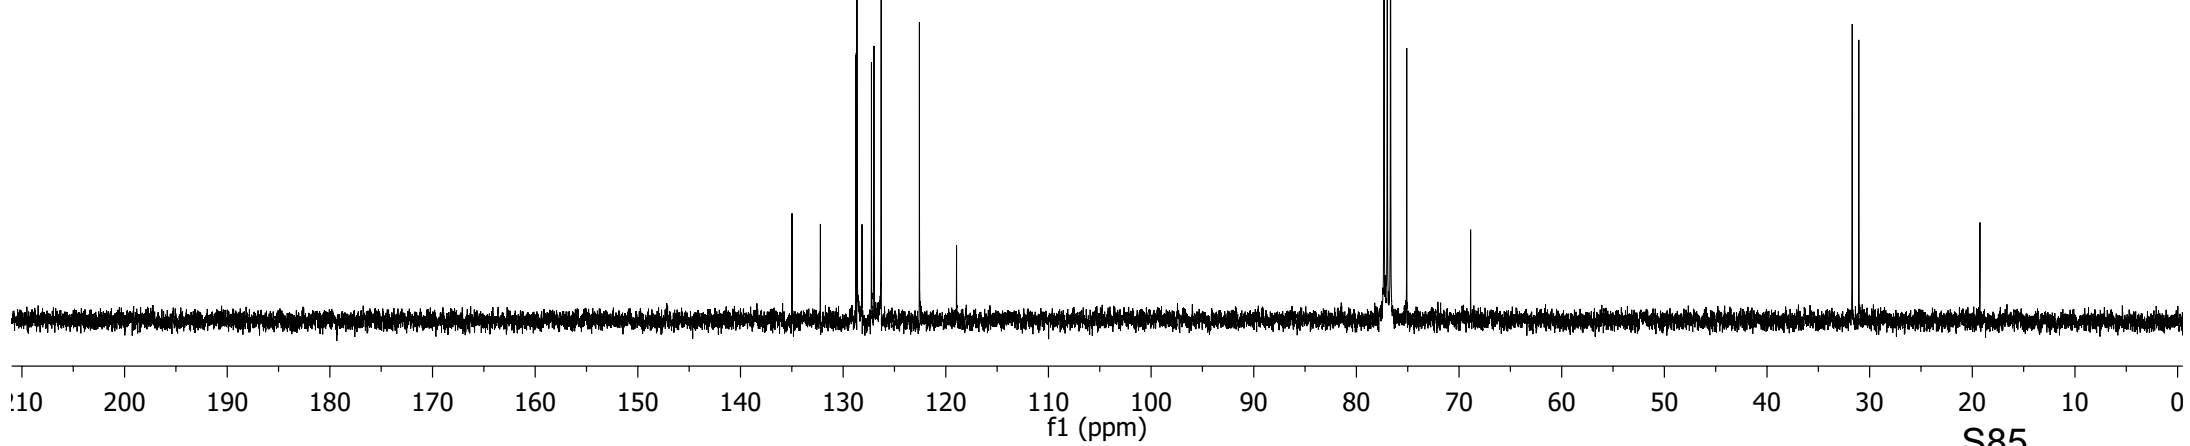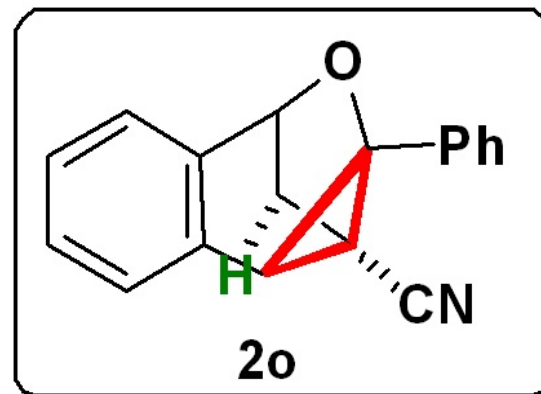

M0269  
TPG-365  
Solvent  
Spectrometer Frequency 400.40

3.38  
2.67  
2.67  
2.66  
2.64  
2.64  
2.63  
2.63  
1.74  
1.71  
1.56  
0.00

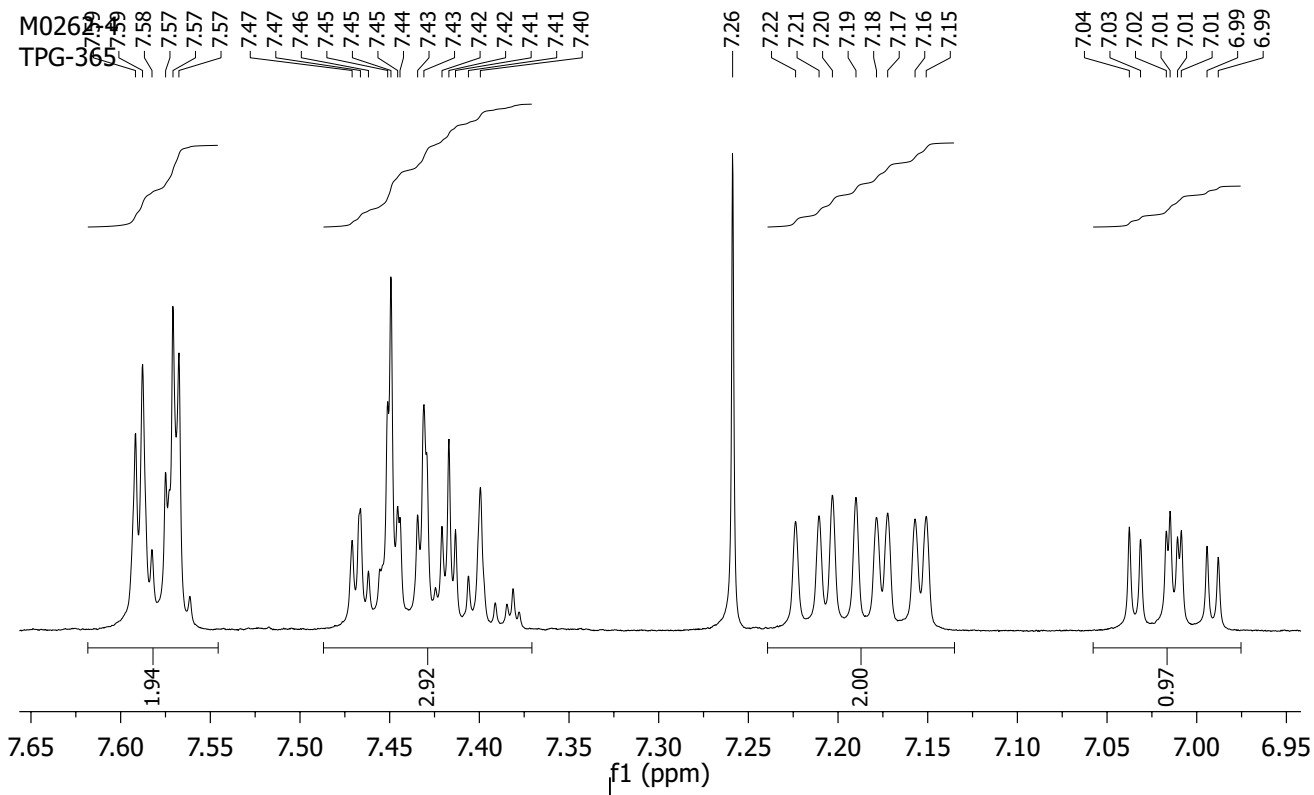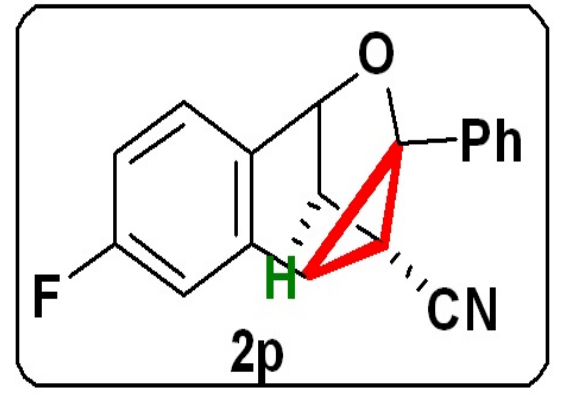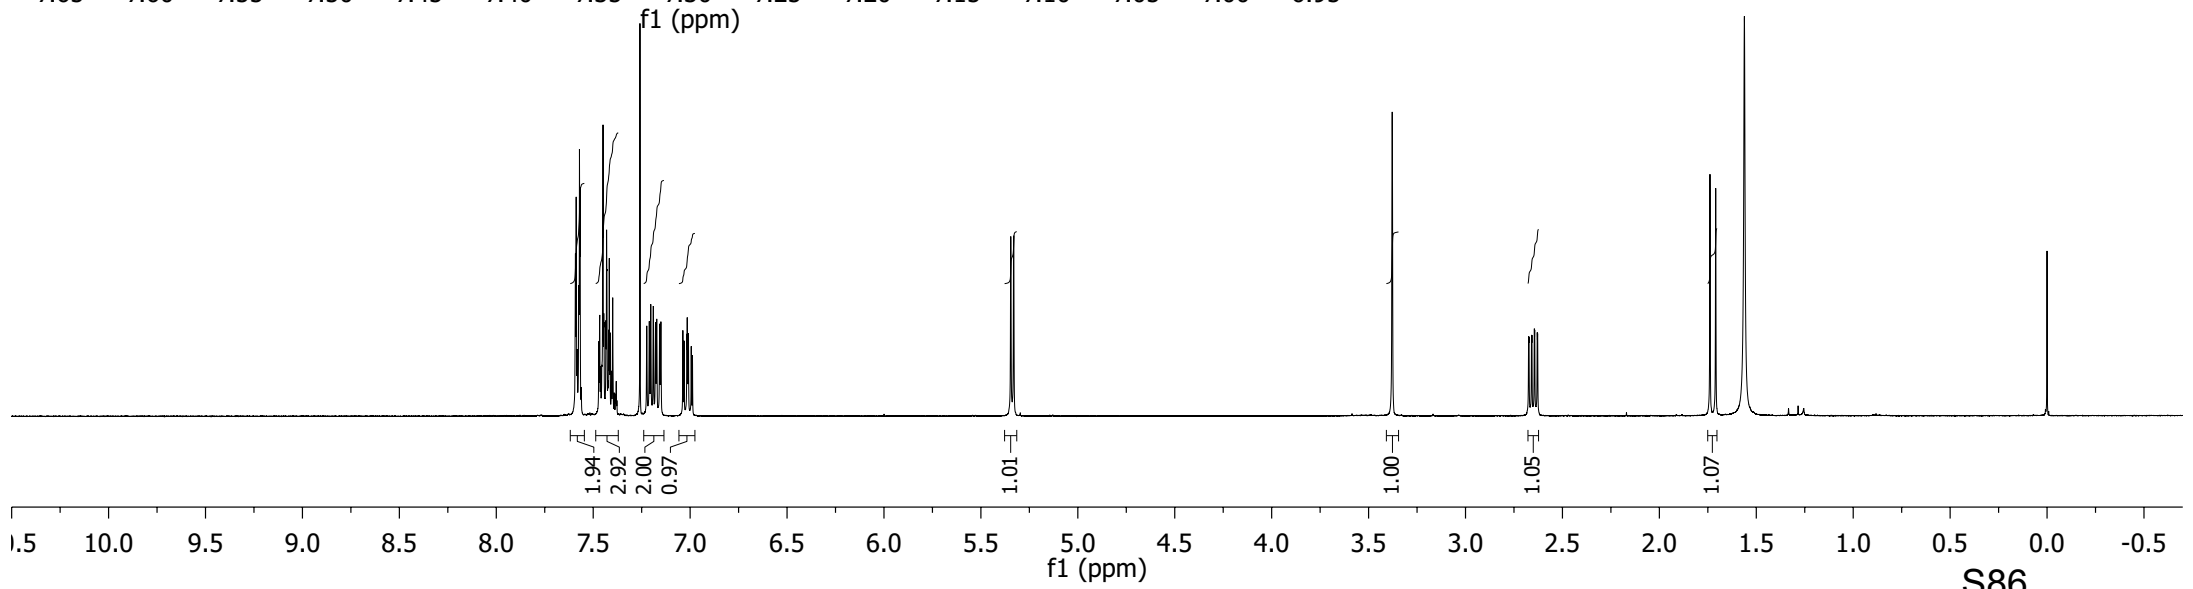

M0262-5  
TPG-365

Solvent

CDCl<sub>3</sub>

Spectrometer Frequency 100.69

—164.01  
—161.56

—131.80  
—130.89  
—130.32  
—130.24  
—128.95  
—128.73  
—126.33  
—124.38  
—124.30  
—118.56  
—114.58  
—114.35  
—113.96  
—113.75

—77.31  
—76.99  
—76.68  
—74.48  
—68.75

—31.84  
—30.97  
—30.95

—19.42

M0262-5  
TPG-365  
—131.80  
—130.89  
—130.32  
—130.24  
—128.95  
—128.73  
—126.33  
—124.38  
—124.30  
—118.56

—114.58  
—114.35  
—113.96  
—113.75

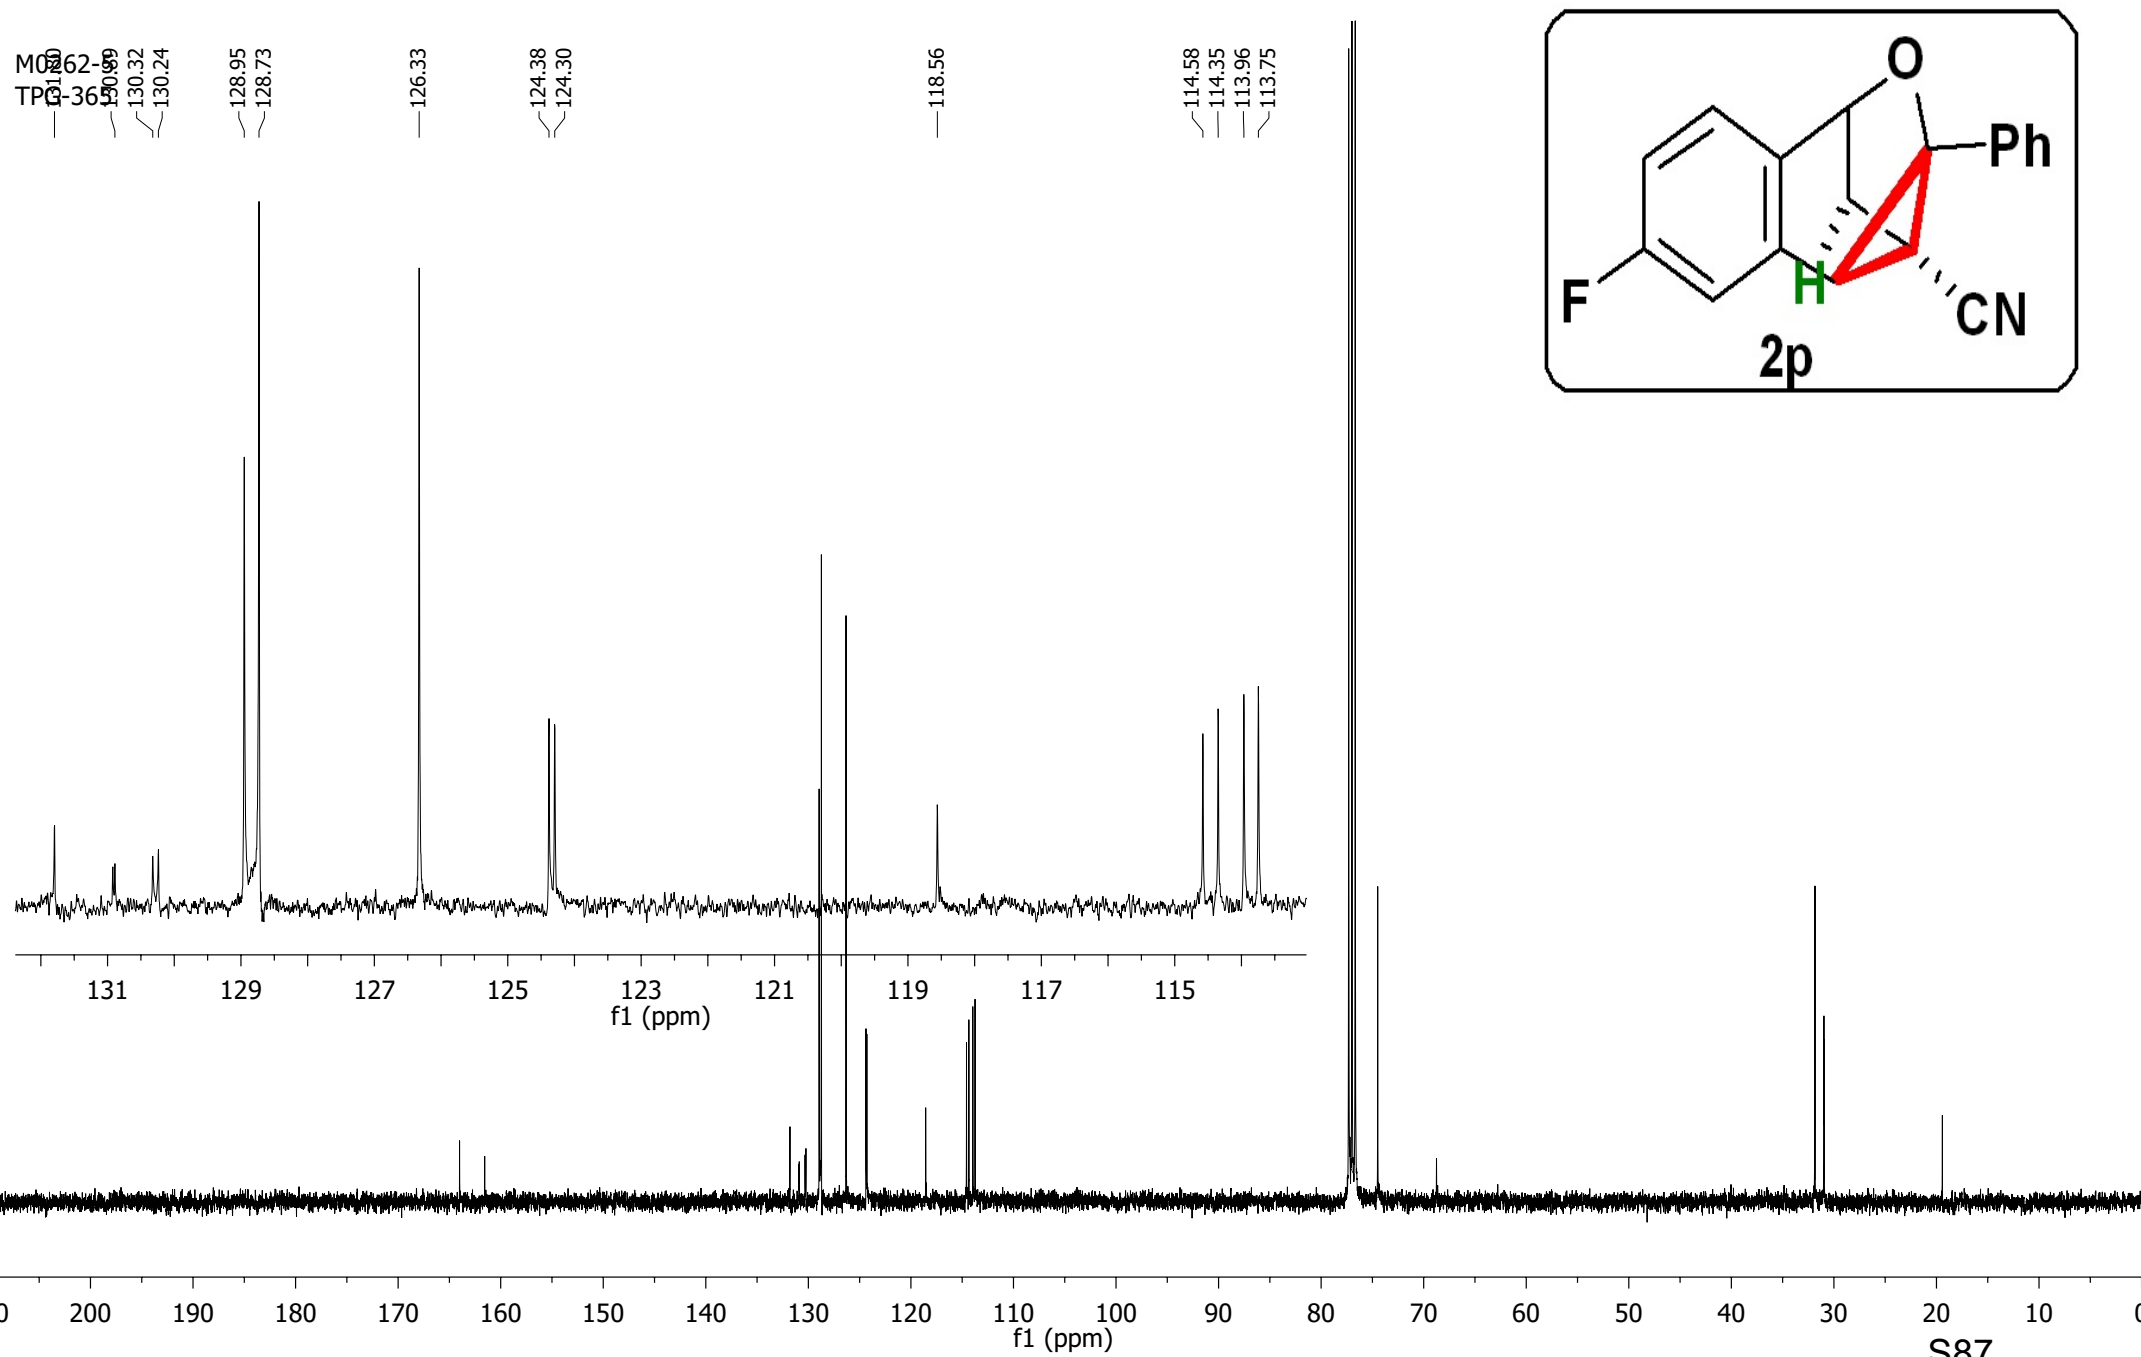

S87

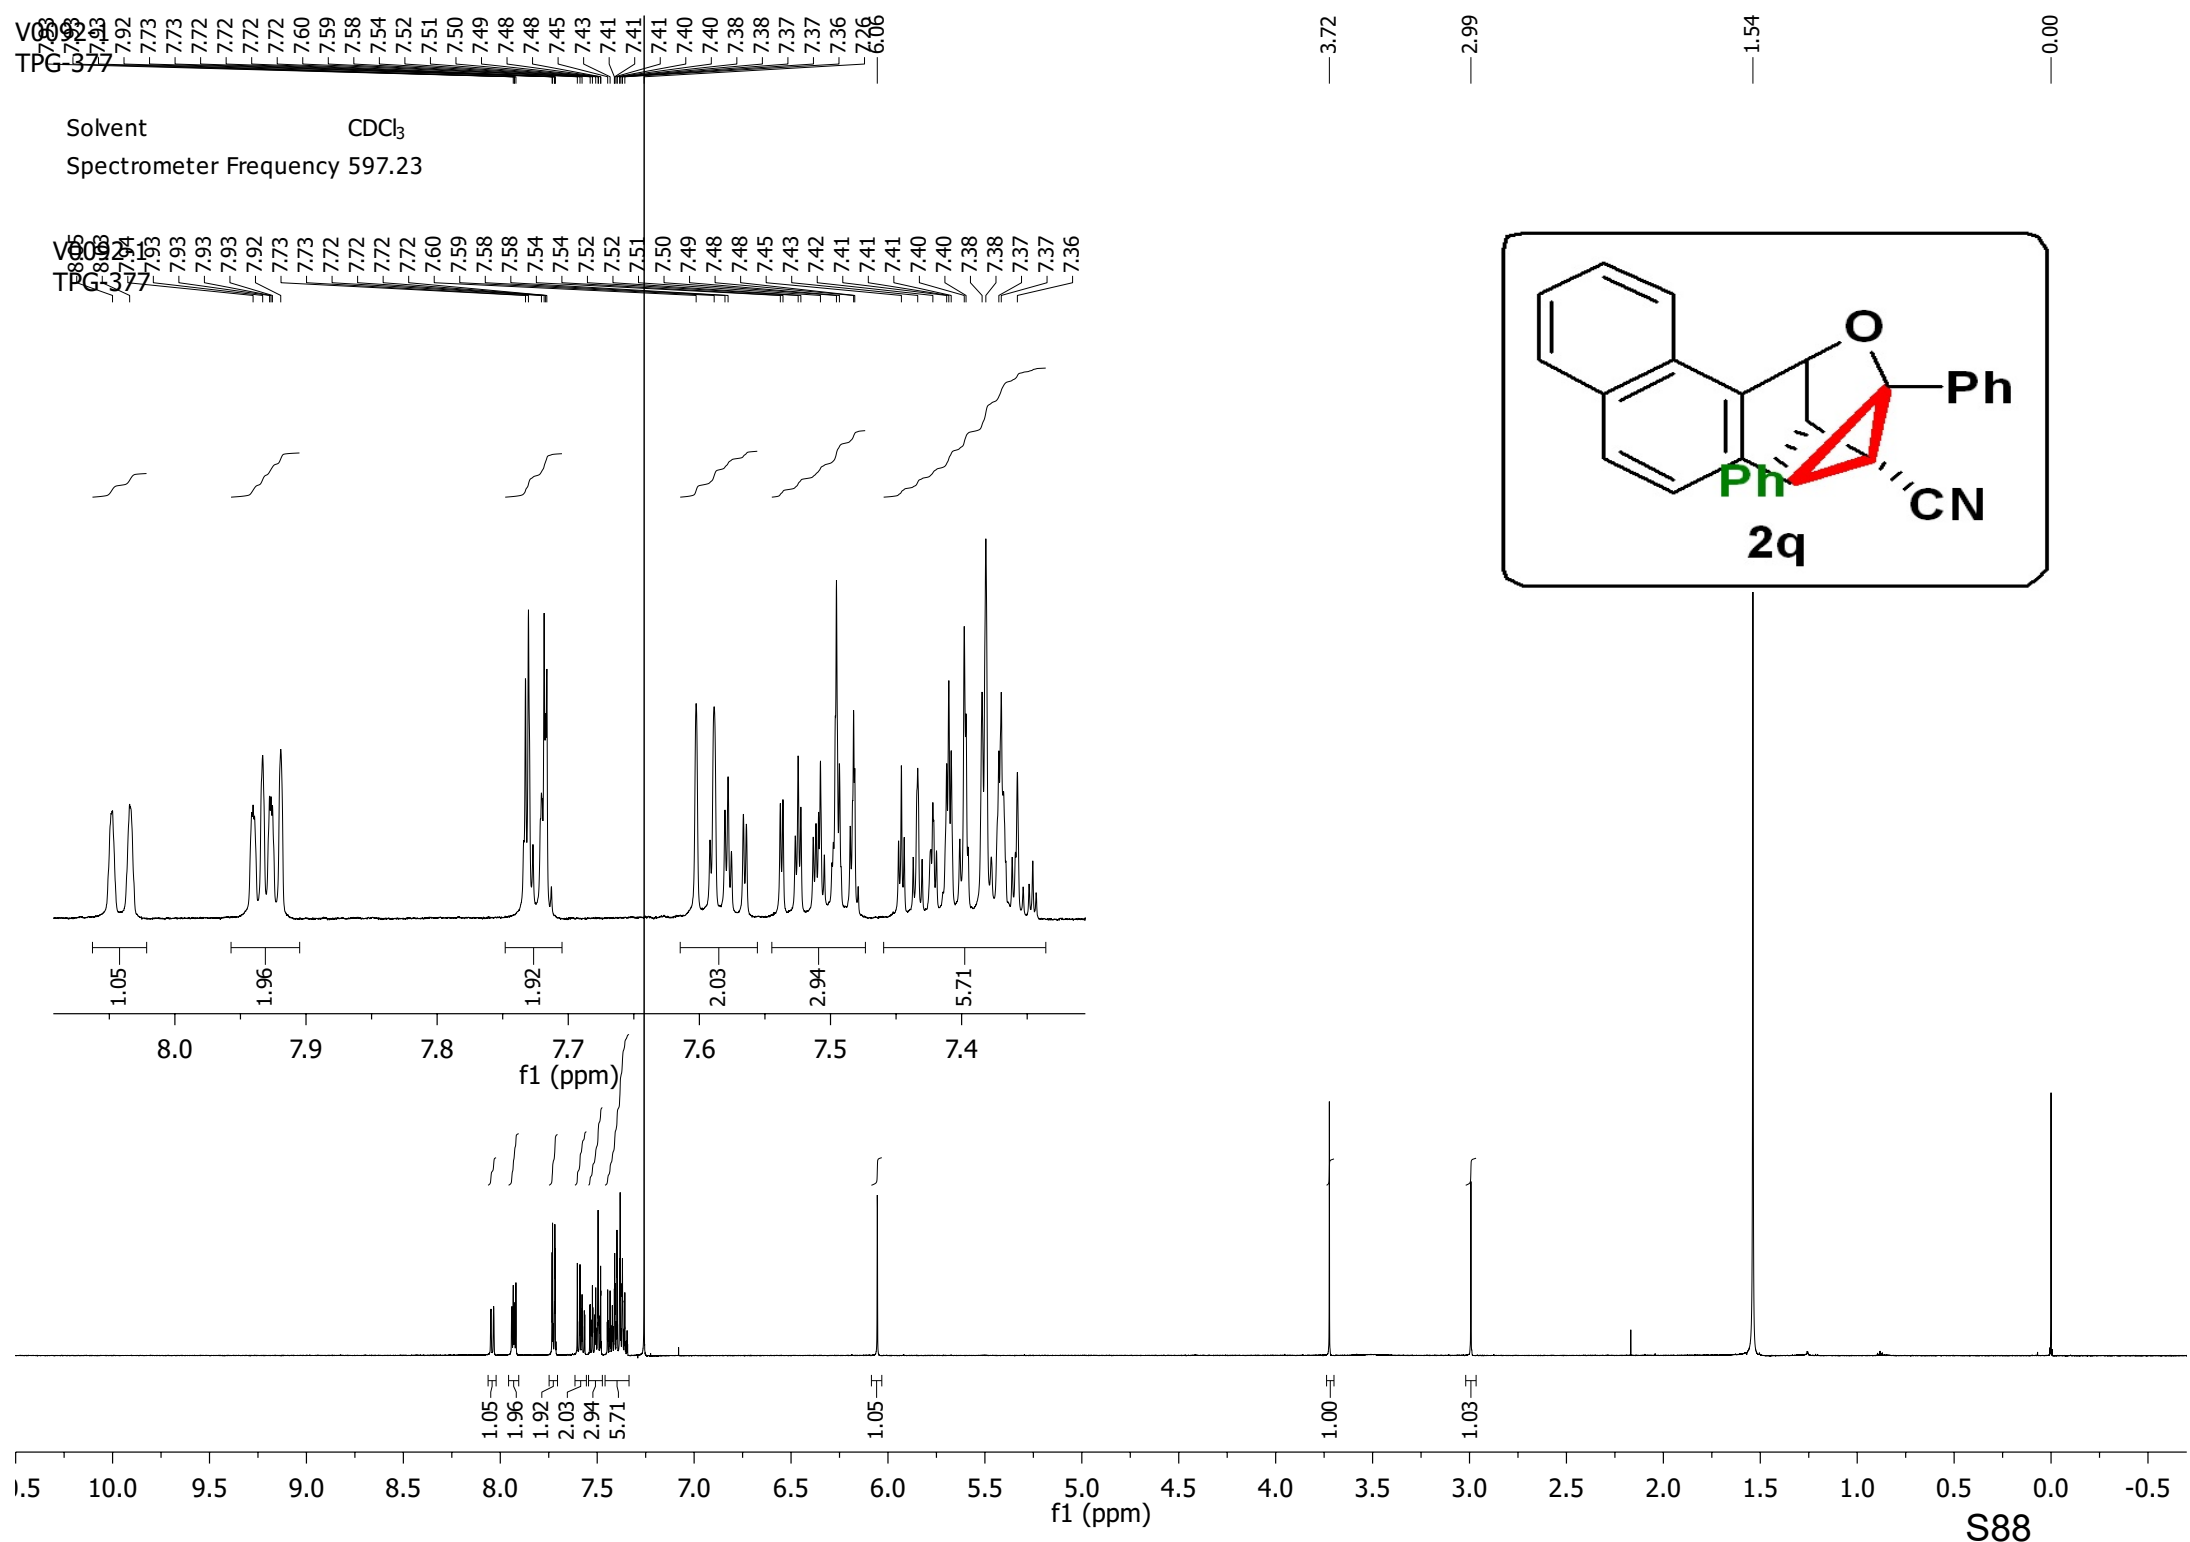



V0092-2  
TPG-377

Solvent  $\text{CDCl}_3$   
Spectrometer Frequency 150.19

137.18  
132.54  
132.01  
131.56  
129.21  
128.93  
128.86  
128.82  
128.12  
127.88  
127.24  
127.07  
126.05  
126.01  
125.81  
125.15  
121.46  
118.17

77.77  
77.20  
76.99  
76.78  
69.50

48.75  
34.51  
26.42

V0092-2  
TPG-377

132.54  
132.01  
131.56

129.21  
128.93  
128.86  
128.82  
128.12  
127.88  
127.24  
127.07  
126.05  
126.01  
125.81  
125.15

121.46

118.17

138 136 134 132 130 128 126 124 122 120 118  
f1 (ppm)

210 200 190 180 170 160 150 140 130 120 110 100 90 80 70 60 50 40 30 20 10 0  
f1 (ppm)

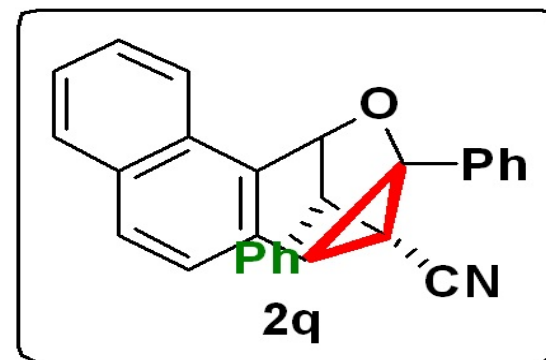

M0267-76  
TPG-369

Solvent CDCl<sub>3</sub>  
Spectrometer Frequency 400.40

M0267-76  
TPG-369

7.66 7.64 7.49 7.48 7.47 7.46 7.45 7.43 7.43 7.41 7.33 7.32 7.31 7.31 7.29 7.26 7.15 7.15 7.13 7.13 7.11 7.11 6.88 6.86 6.79 6.76 6.63 6.63 6.62 6.61 5.34 5.32

4.17 4.15

3.68 3.56

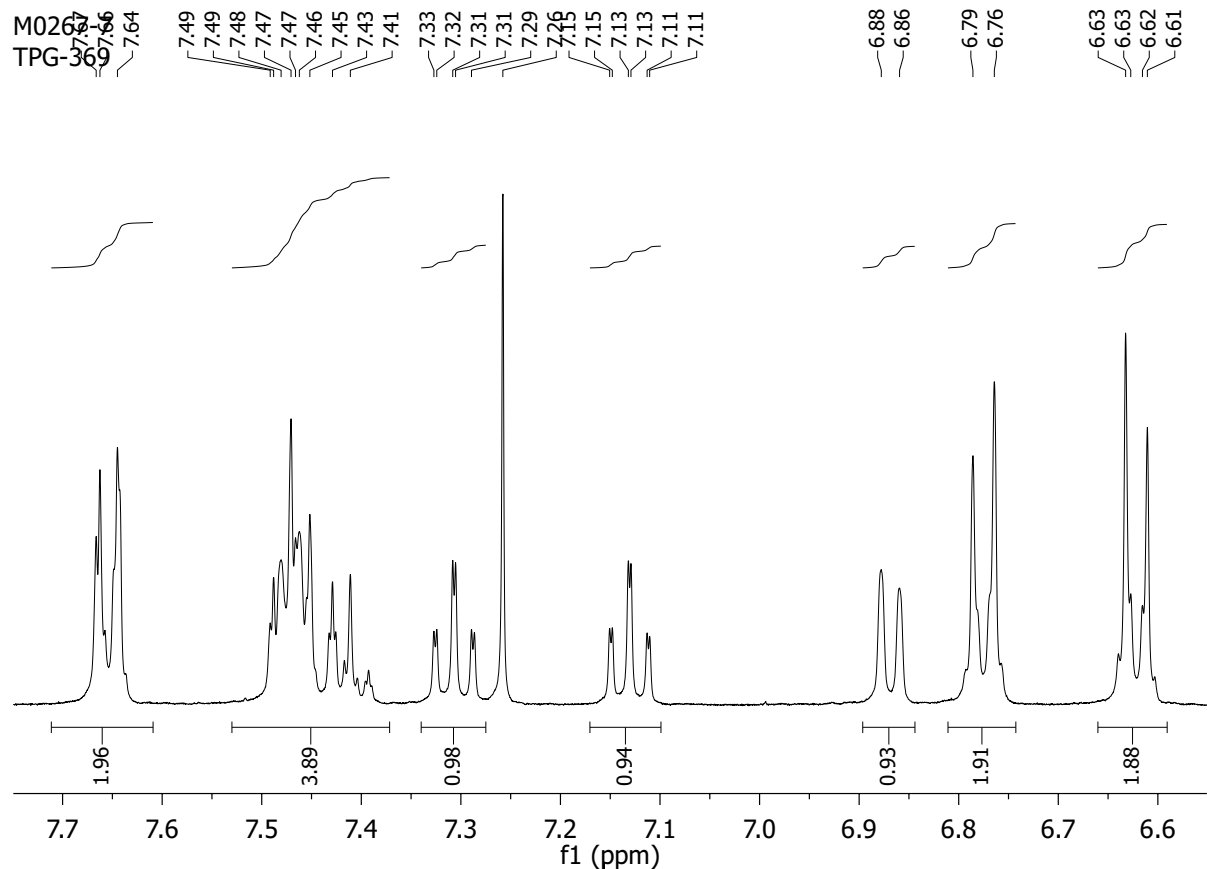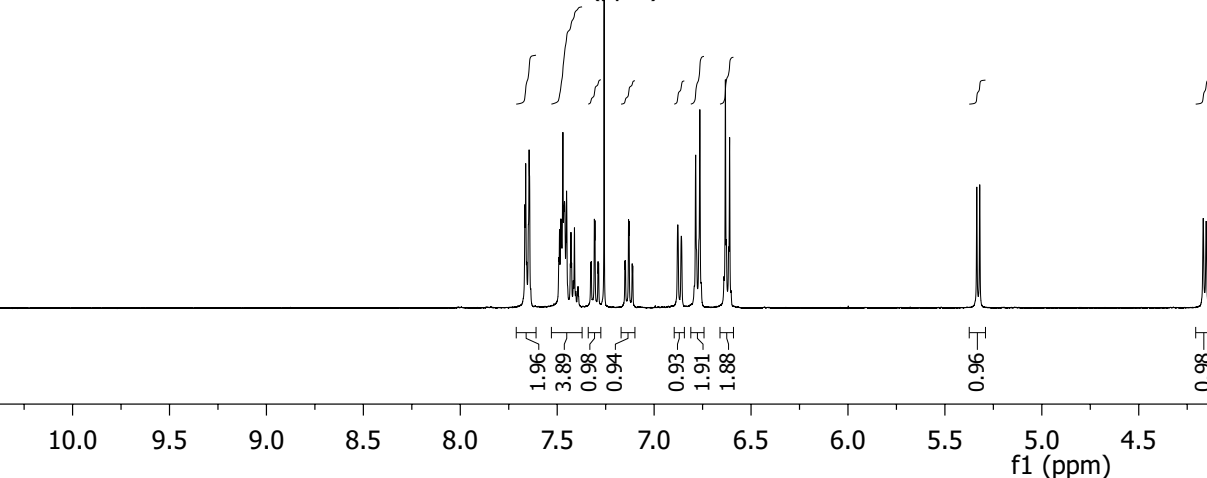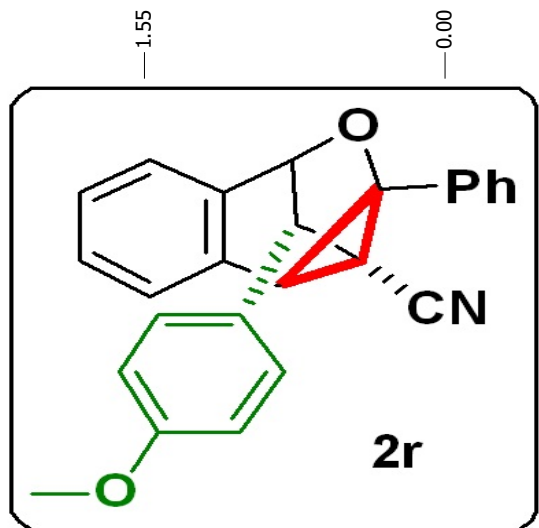

M0267-8  
TPG-369

Solvent

$\text{CDCl}_3$

Spectrometer Frequency 100.69

158.69

132.34  
131.65  
129.47  
128.89  
128.71  
128.62  
128.59  
127.05  
126.42  
126.33  
124.84  
124.47  
118.56

113.82

79.09  
77.31  
76.99  
76.67  
69.33

55.08  
46.27  
31.00  
24.41

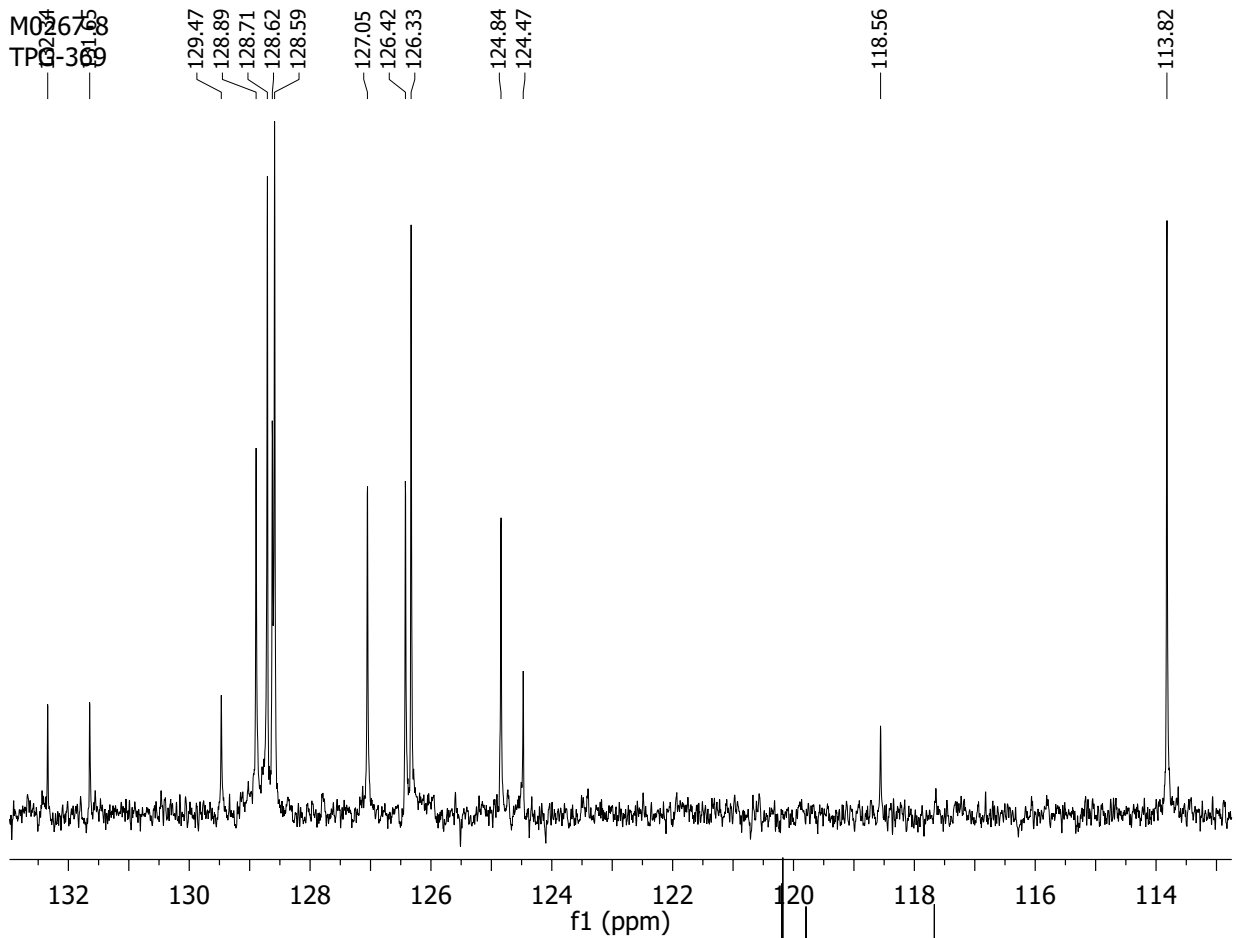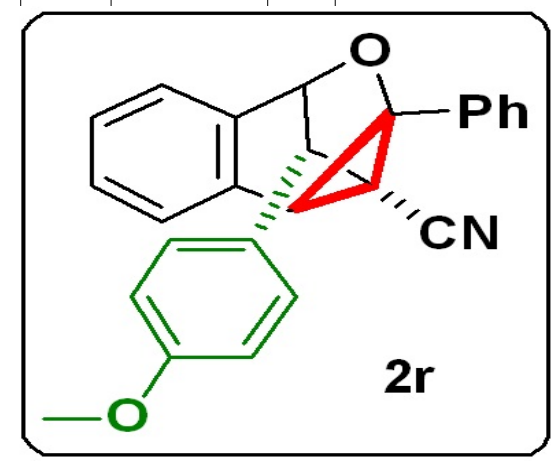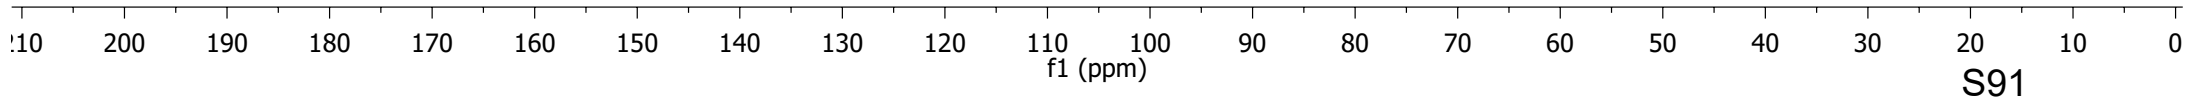

M02574  
TPG-360

Solvent

CDCl<sub>3</sub>

Spectrometer Frequency 400.40

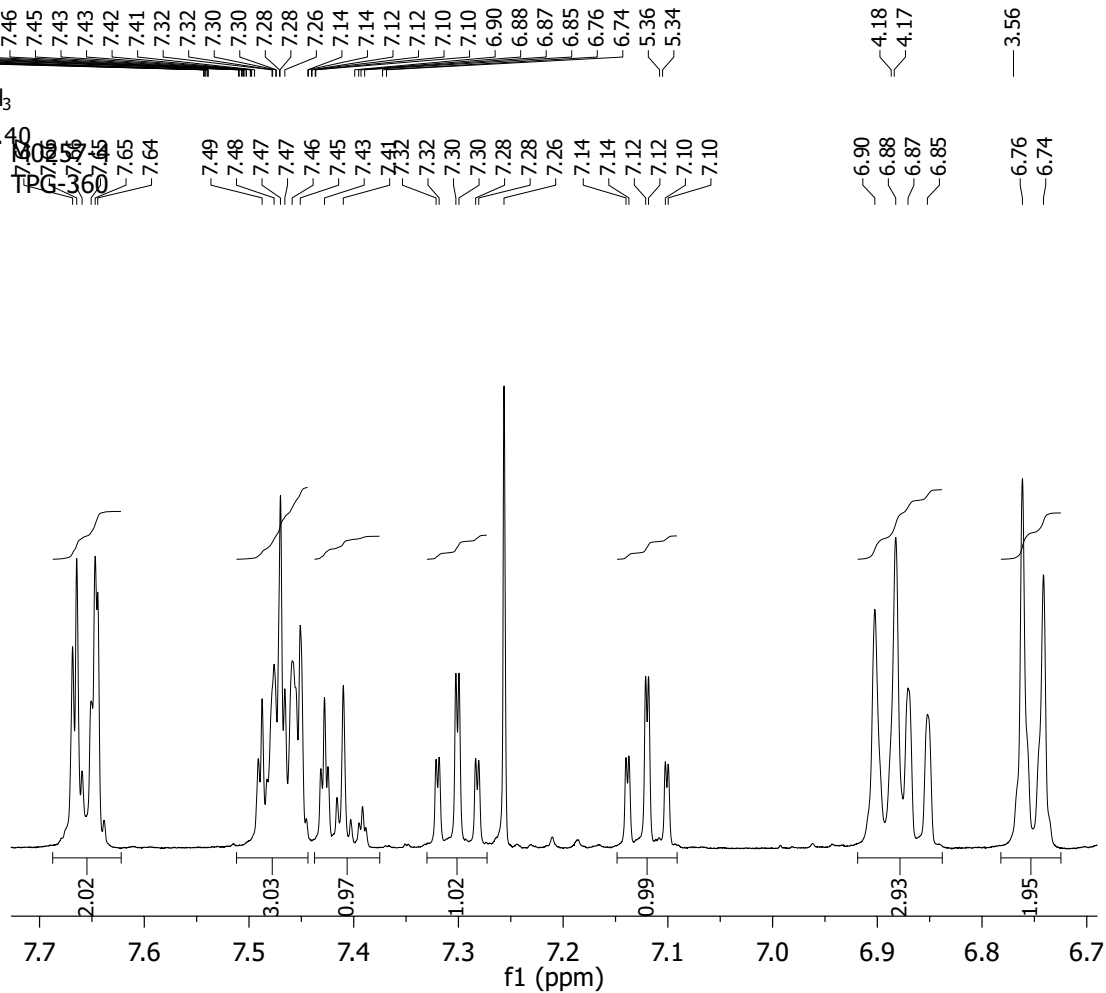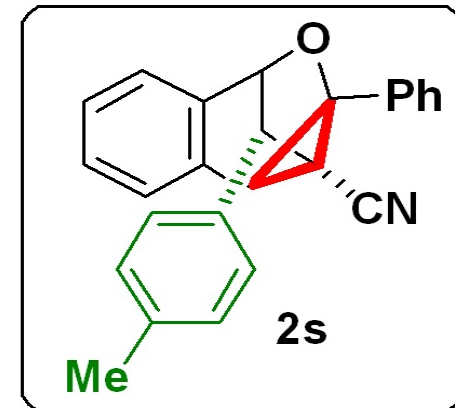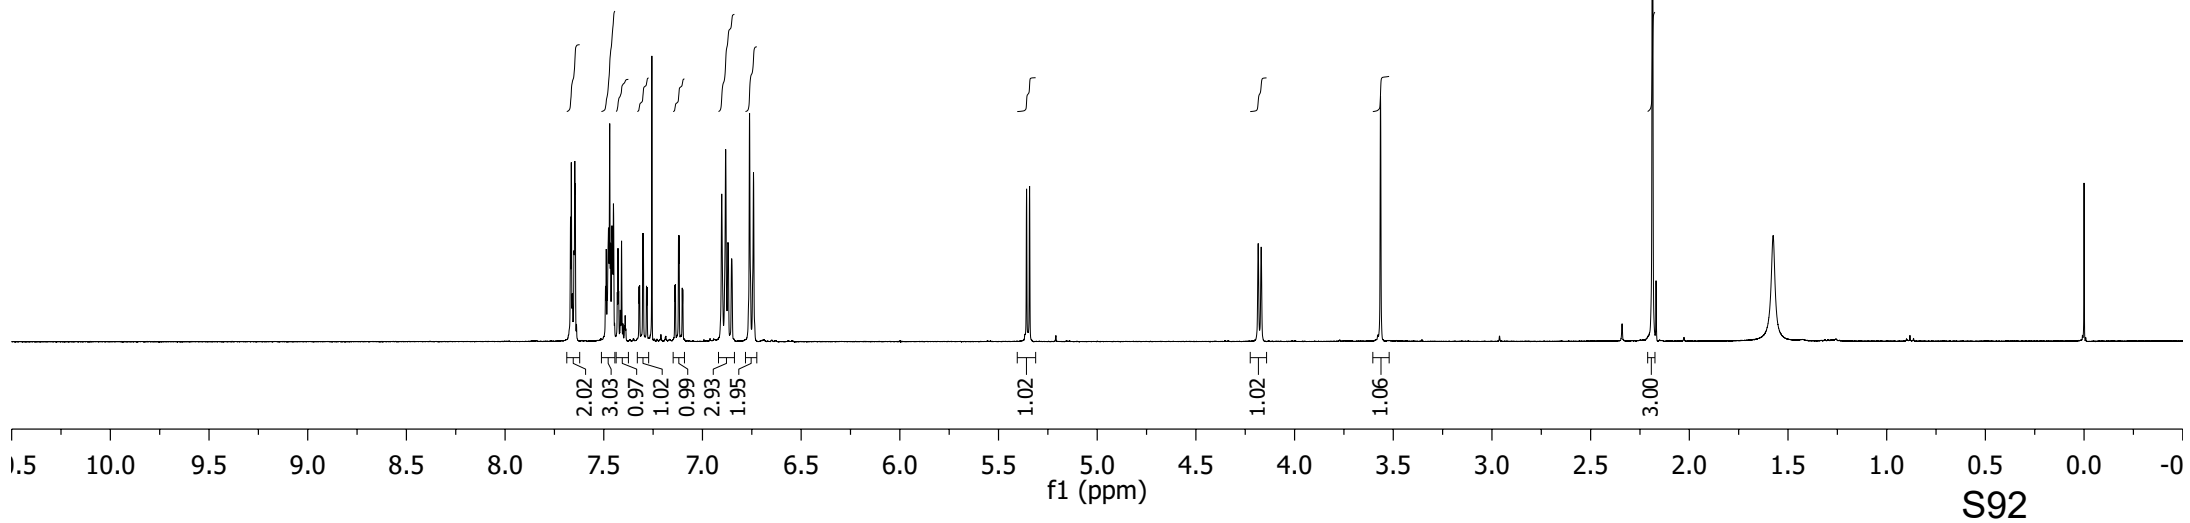

M0257-5  
TPG-360 Solvent  $\text{CDCl}_3$   
Spectrometer Frequency 100.69

136.98  
132.35  
131.63  
129.47  
129.44  
129.08  
128.89  
128.70  
128.61  
127.36  
126.98  
126.43  
126.34  
124.79  
118.55

79.09  
77.31  
76.99  
76.68  
69.33

46.63  
31.01  
24.23  
20.96

M0257-5  
TPG-360  
132.35  
131.63  
129.47  
129.44  
129.08  
128.89  
128.70  
128.61  
127.36  
126.98  
126.43  
126.34  
124.79  
118.55

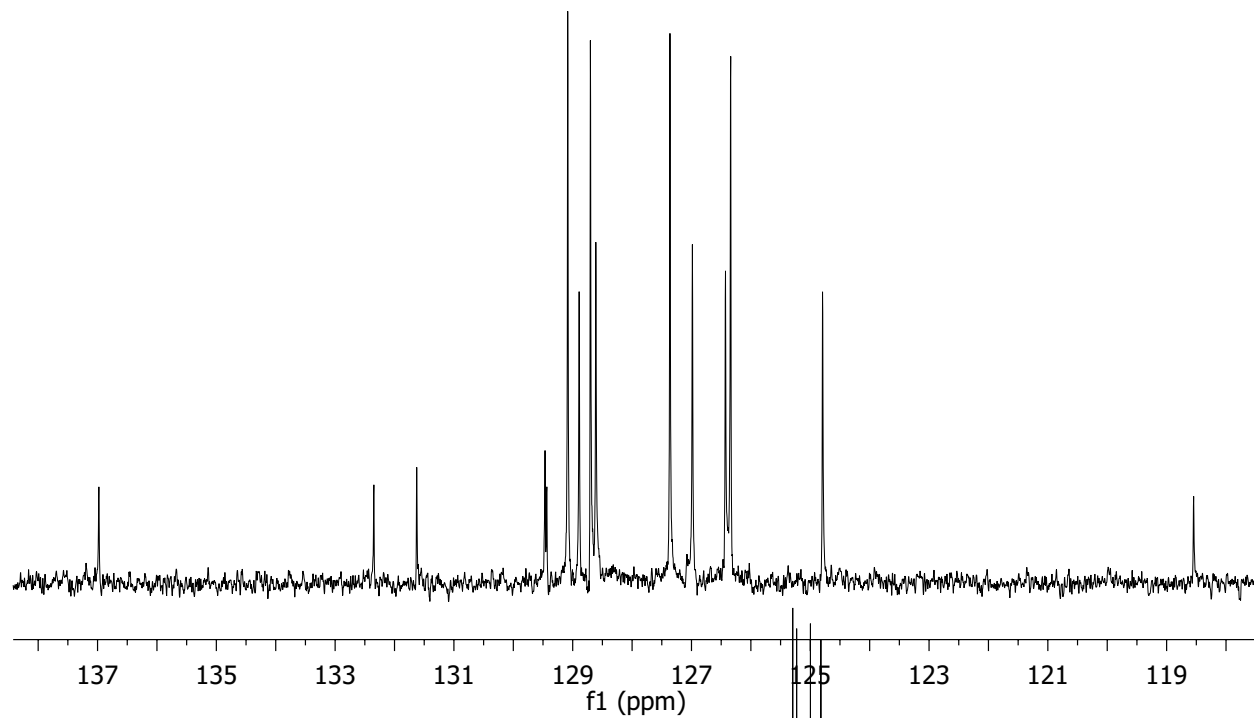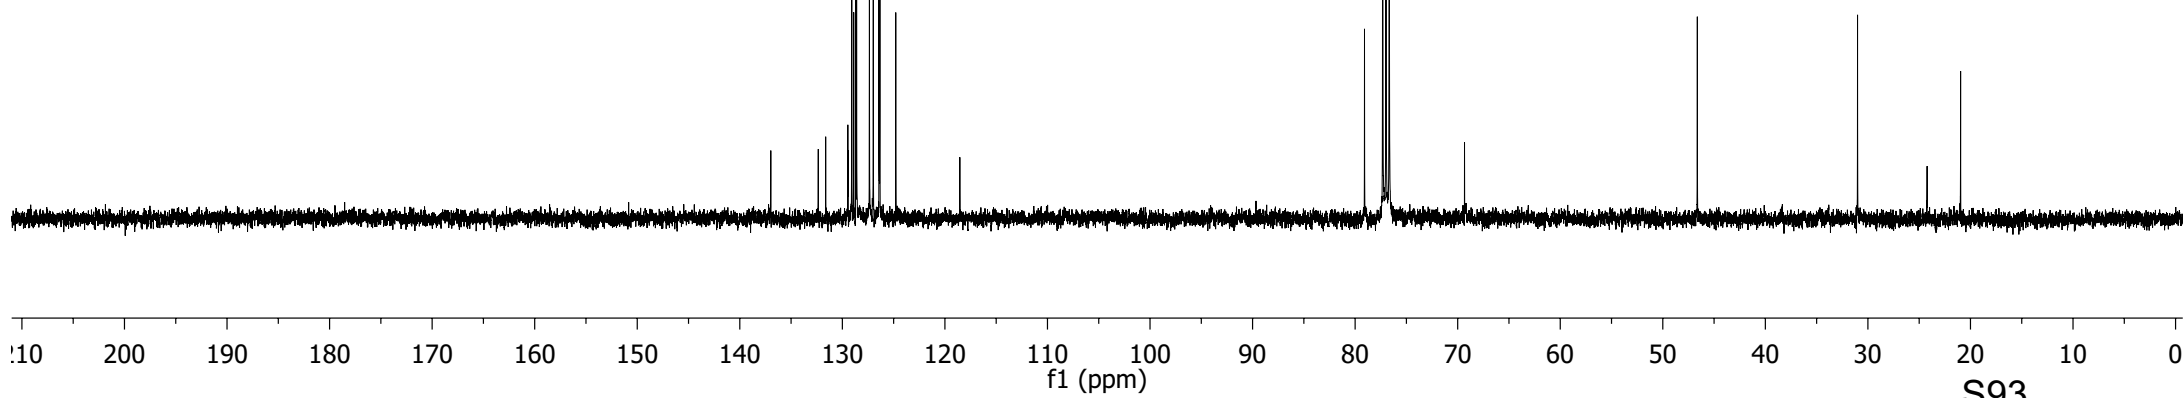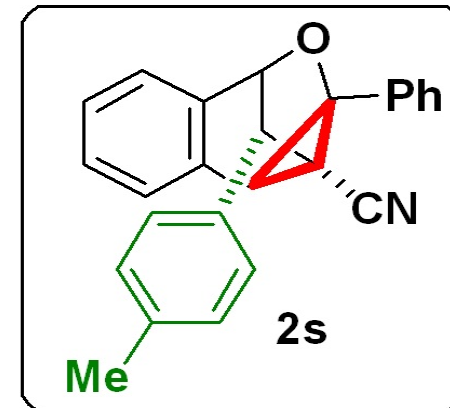

M 2694  
TPG-372

Solvent  $\text{CDCl}_3$   
Spectrometer Frequency 400.40

7.56  
7.50  
7.48  
7.47  
7.46  
7.46  
7.44  
7.44  
7.44  
7.42  
7.34  
7.33  
7.32  
7.32  
7.30  
7.30  
7.26  
7.16  
7.16  
7.14  
7.14  
7.12  
7.12  
7.08  
7.08  
7.07  
7.06  
6.86  
6.85  
6.82  
6.82  
5.86  
5.35  
4.19  
4.18  
3.58  
1.55  
0.00

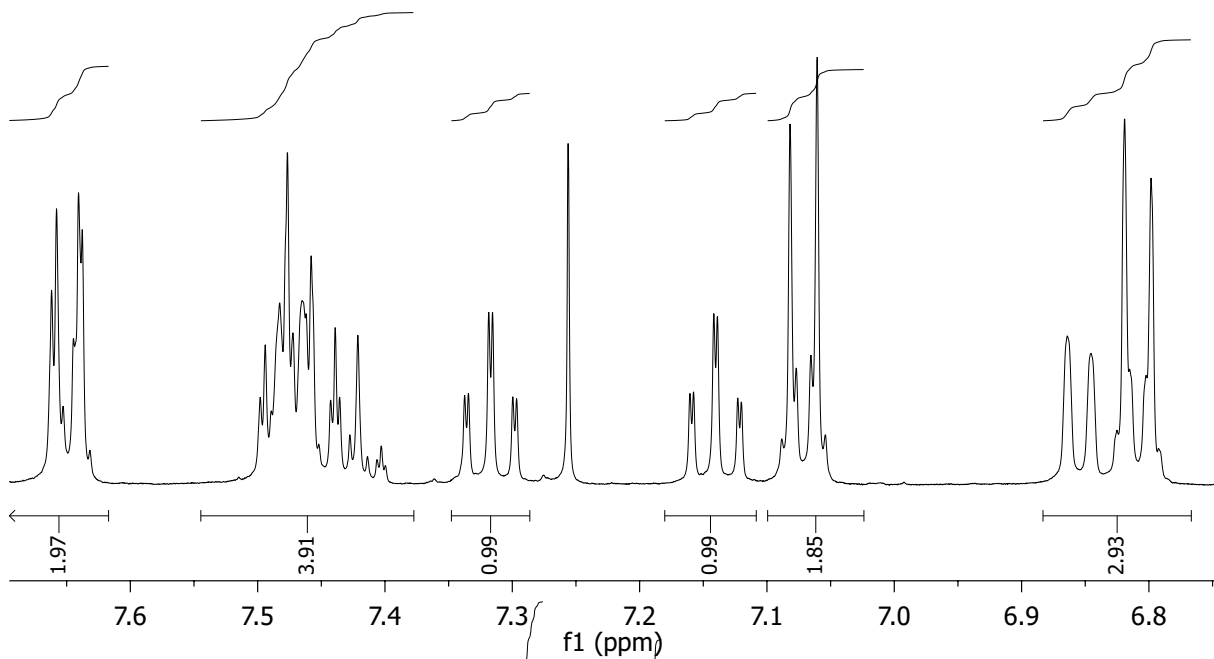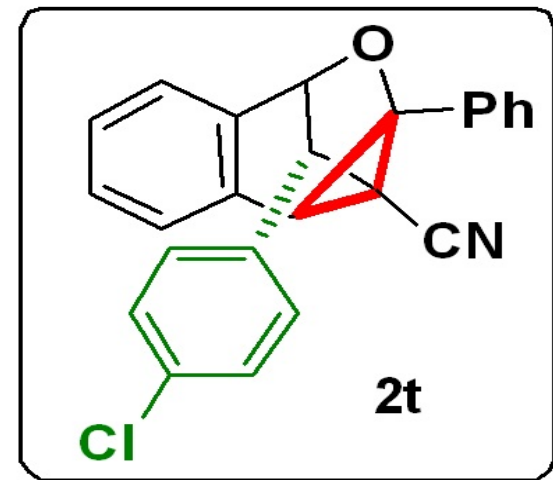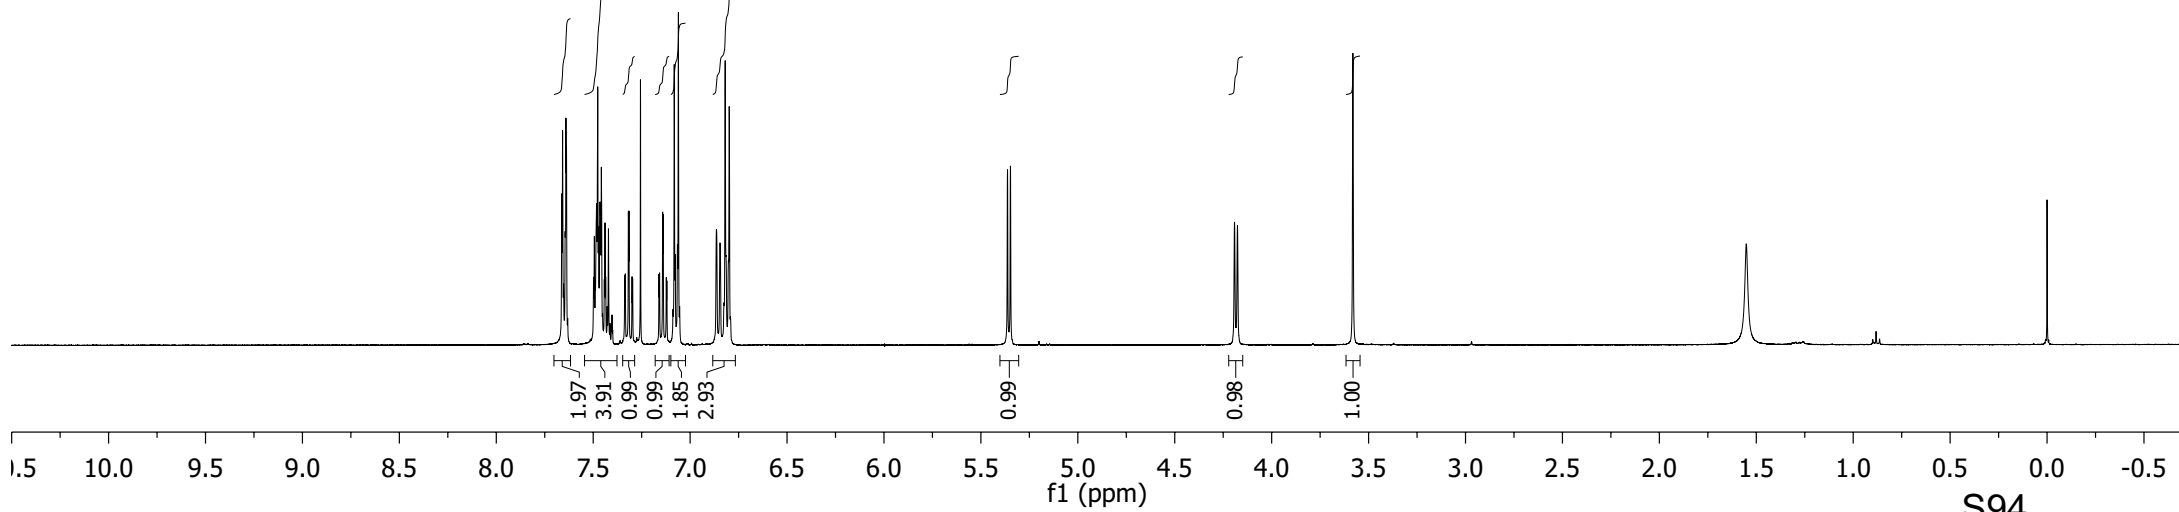

M0269-5  
TPG-372

Solvent CDCl<sub>3</sub>  
Spectrometer Frequency 100.69

133.29  
132.02  
131.26  
131.20  
129.20  
129.04  
128.89  
128.81  
128.76  
128.63  
127.24  
126.52  
126.35  
124.78  
118.23

78.90  
77.31  
76.99  
76.67  
69.53

46.42  
30.98  
24.02

M0269-5  
TPG-372  
132.02  
131.26  
131.20  
129.20  
129.04  
128.89  
128.81  
128.76  
128.63  
127.24  
126.52  
126.35  
124.78  
118.23

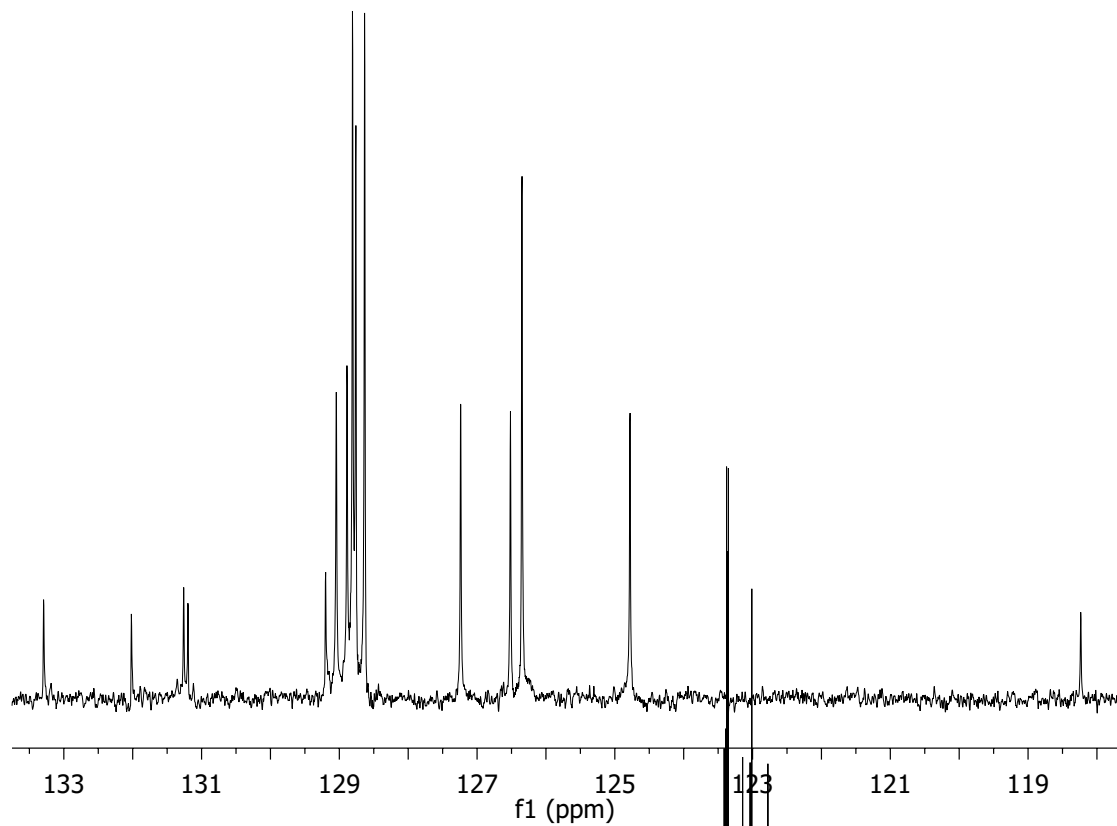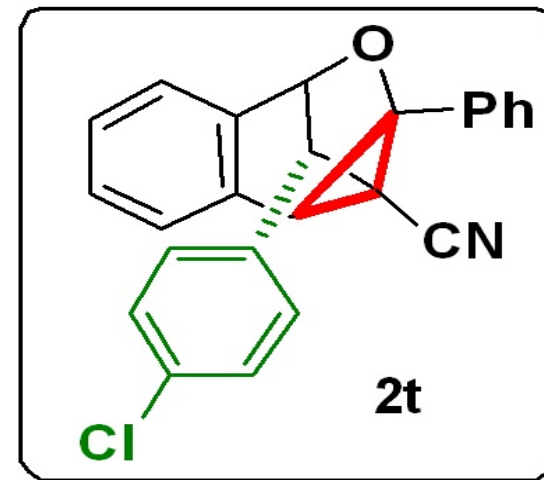

200 190 180 170 160 150 140 130 120 110 100 90 80 70 60 50 40 30 20 10 0  
f1 (ppm)

M0009-4  
TPG-385

Solvent CDCl<sub>3</sub>  
Spectrometer Frequency 400.40

7.766  
7.764  
7.764  
7.749  
7.748  
7.747  
7.747  
7.746  
7.746  
7.744  
7.742  
7.732  
7.732  
7.726  
7.724  
7.723  
7.722  
7.722  
7.717  
7.715  
7.715  
7.687  
7.685  
7.676  
7.676  
7.674

5.37  
5.35  
4.17  
4.16  
3.58

1.55  
0.00

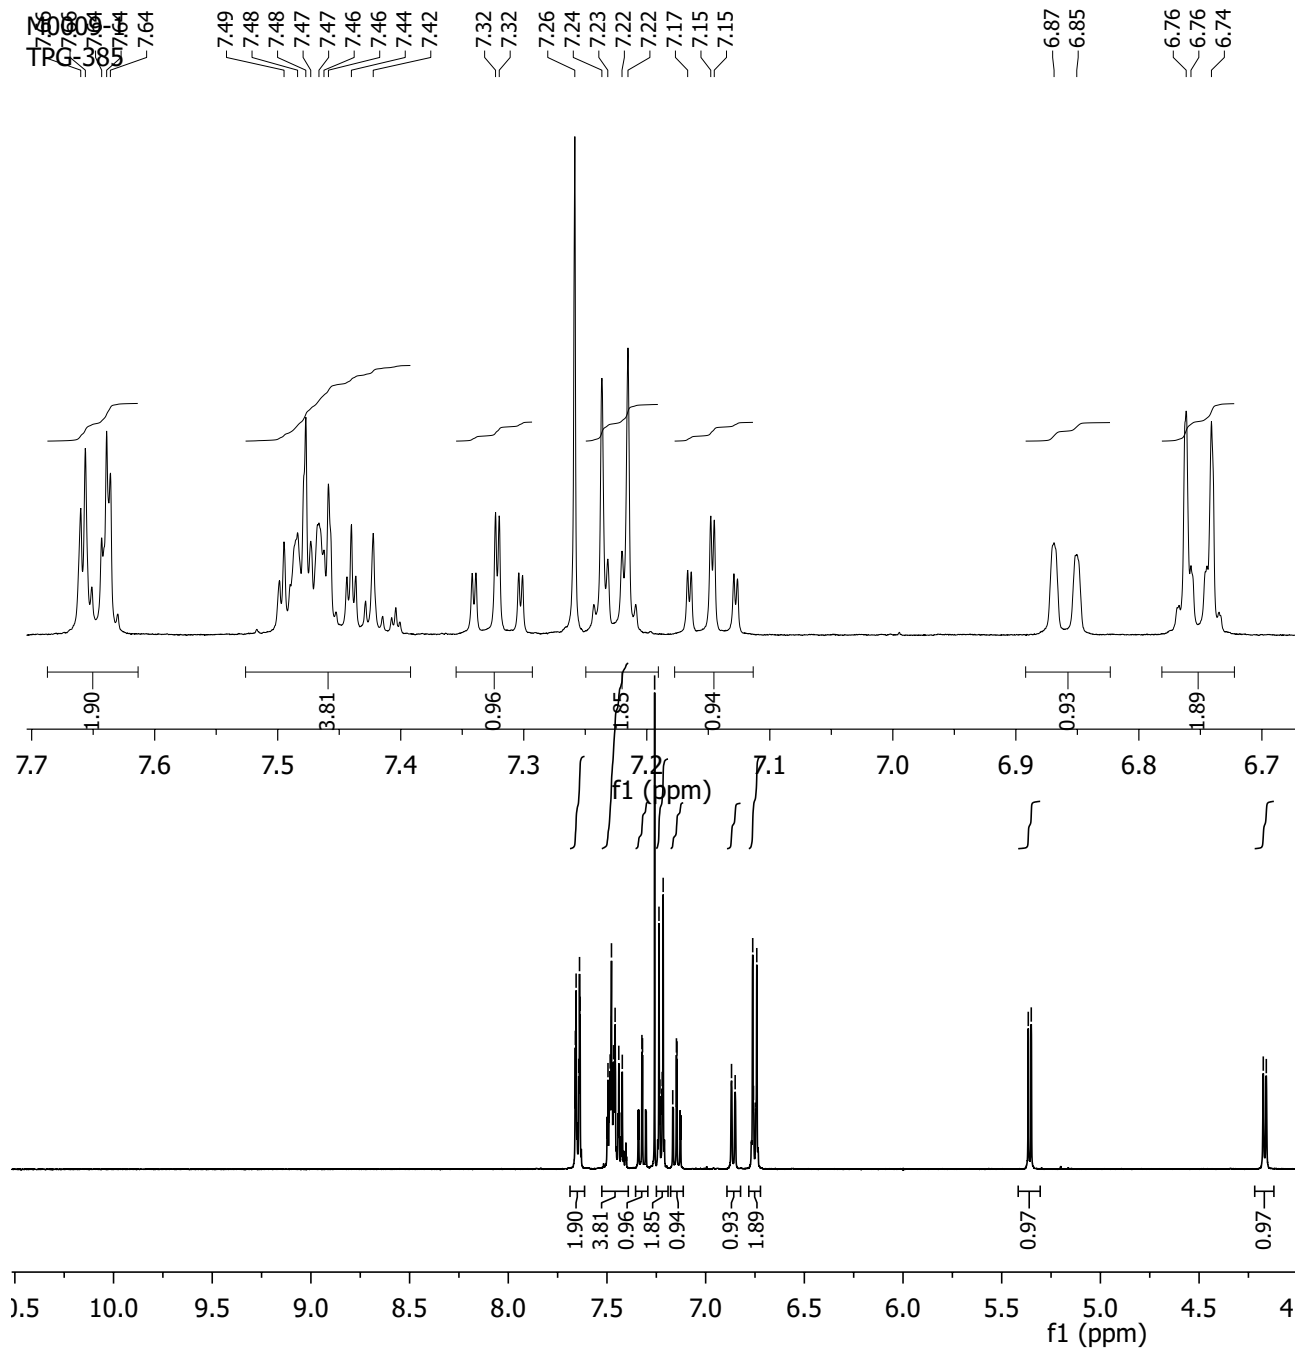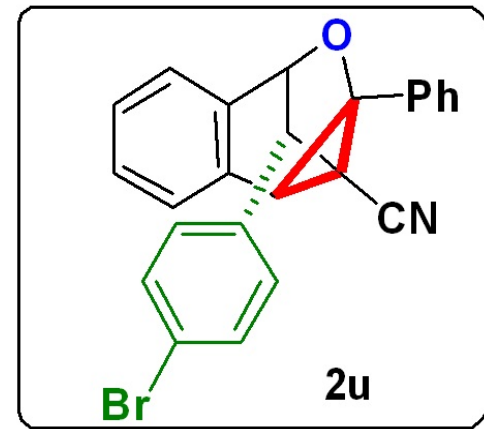



M0009-2  
TPG-385

Solvent CDCl<sub>3</sub>  
Spectrometer Frequency 100.69

M0009-2  
TPG-385

129.15  
129.05  
128.91  
128.76

127.27  
126.51  
126.35

124.79

121.43

118.21

132.00  
131.79  
131.58  
131.17  
129.15  
129.05  
128.91  
128.76  
127.27  
126.51  
126.35  
124.79  
121.43  
118.21  
109.89

78.83  
77.31  
76.99  
76.68

69.29

46.49

30.98

23.98

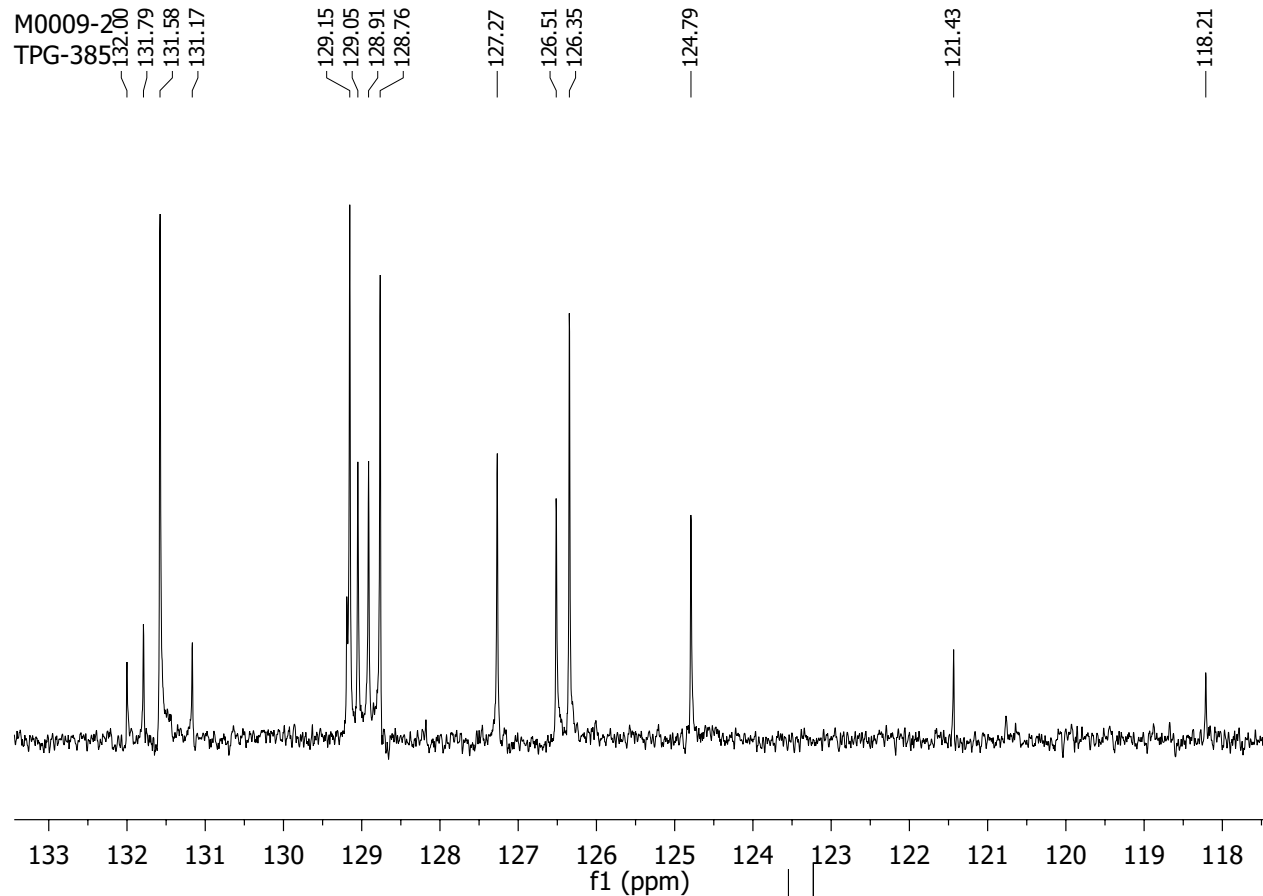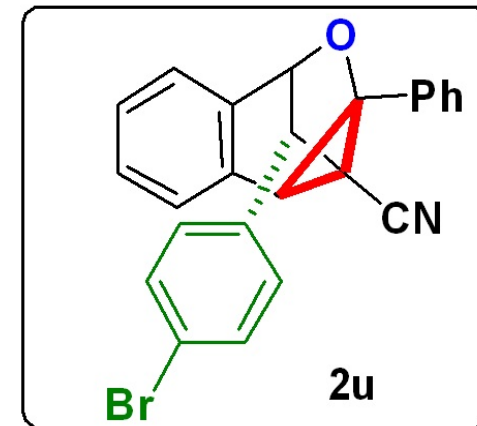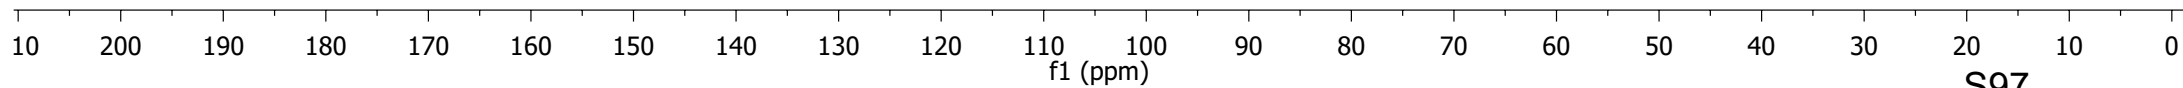

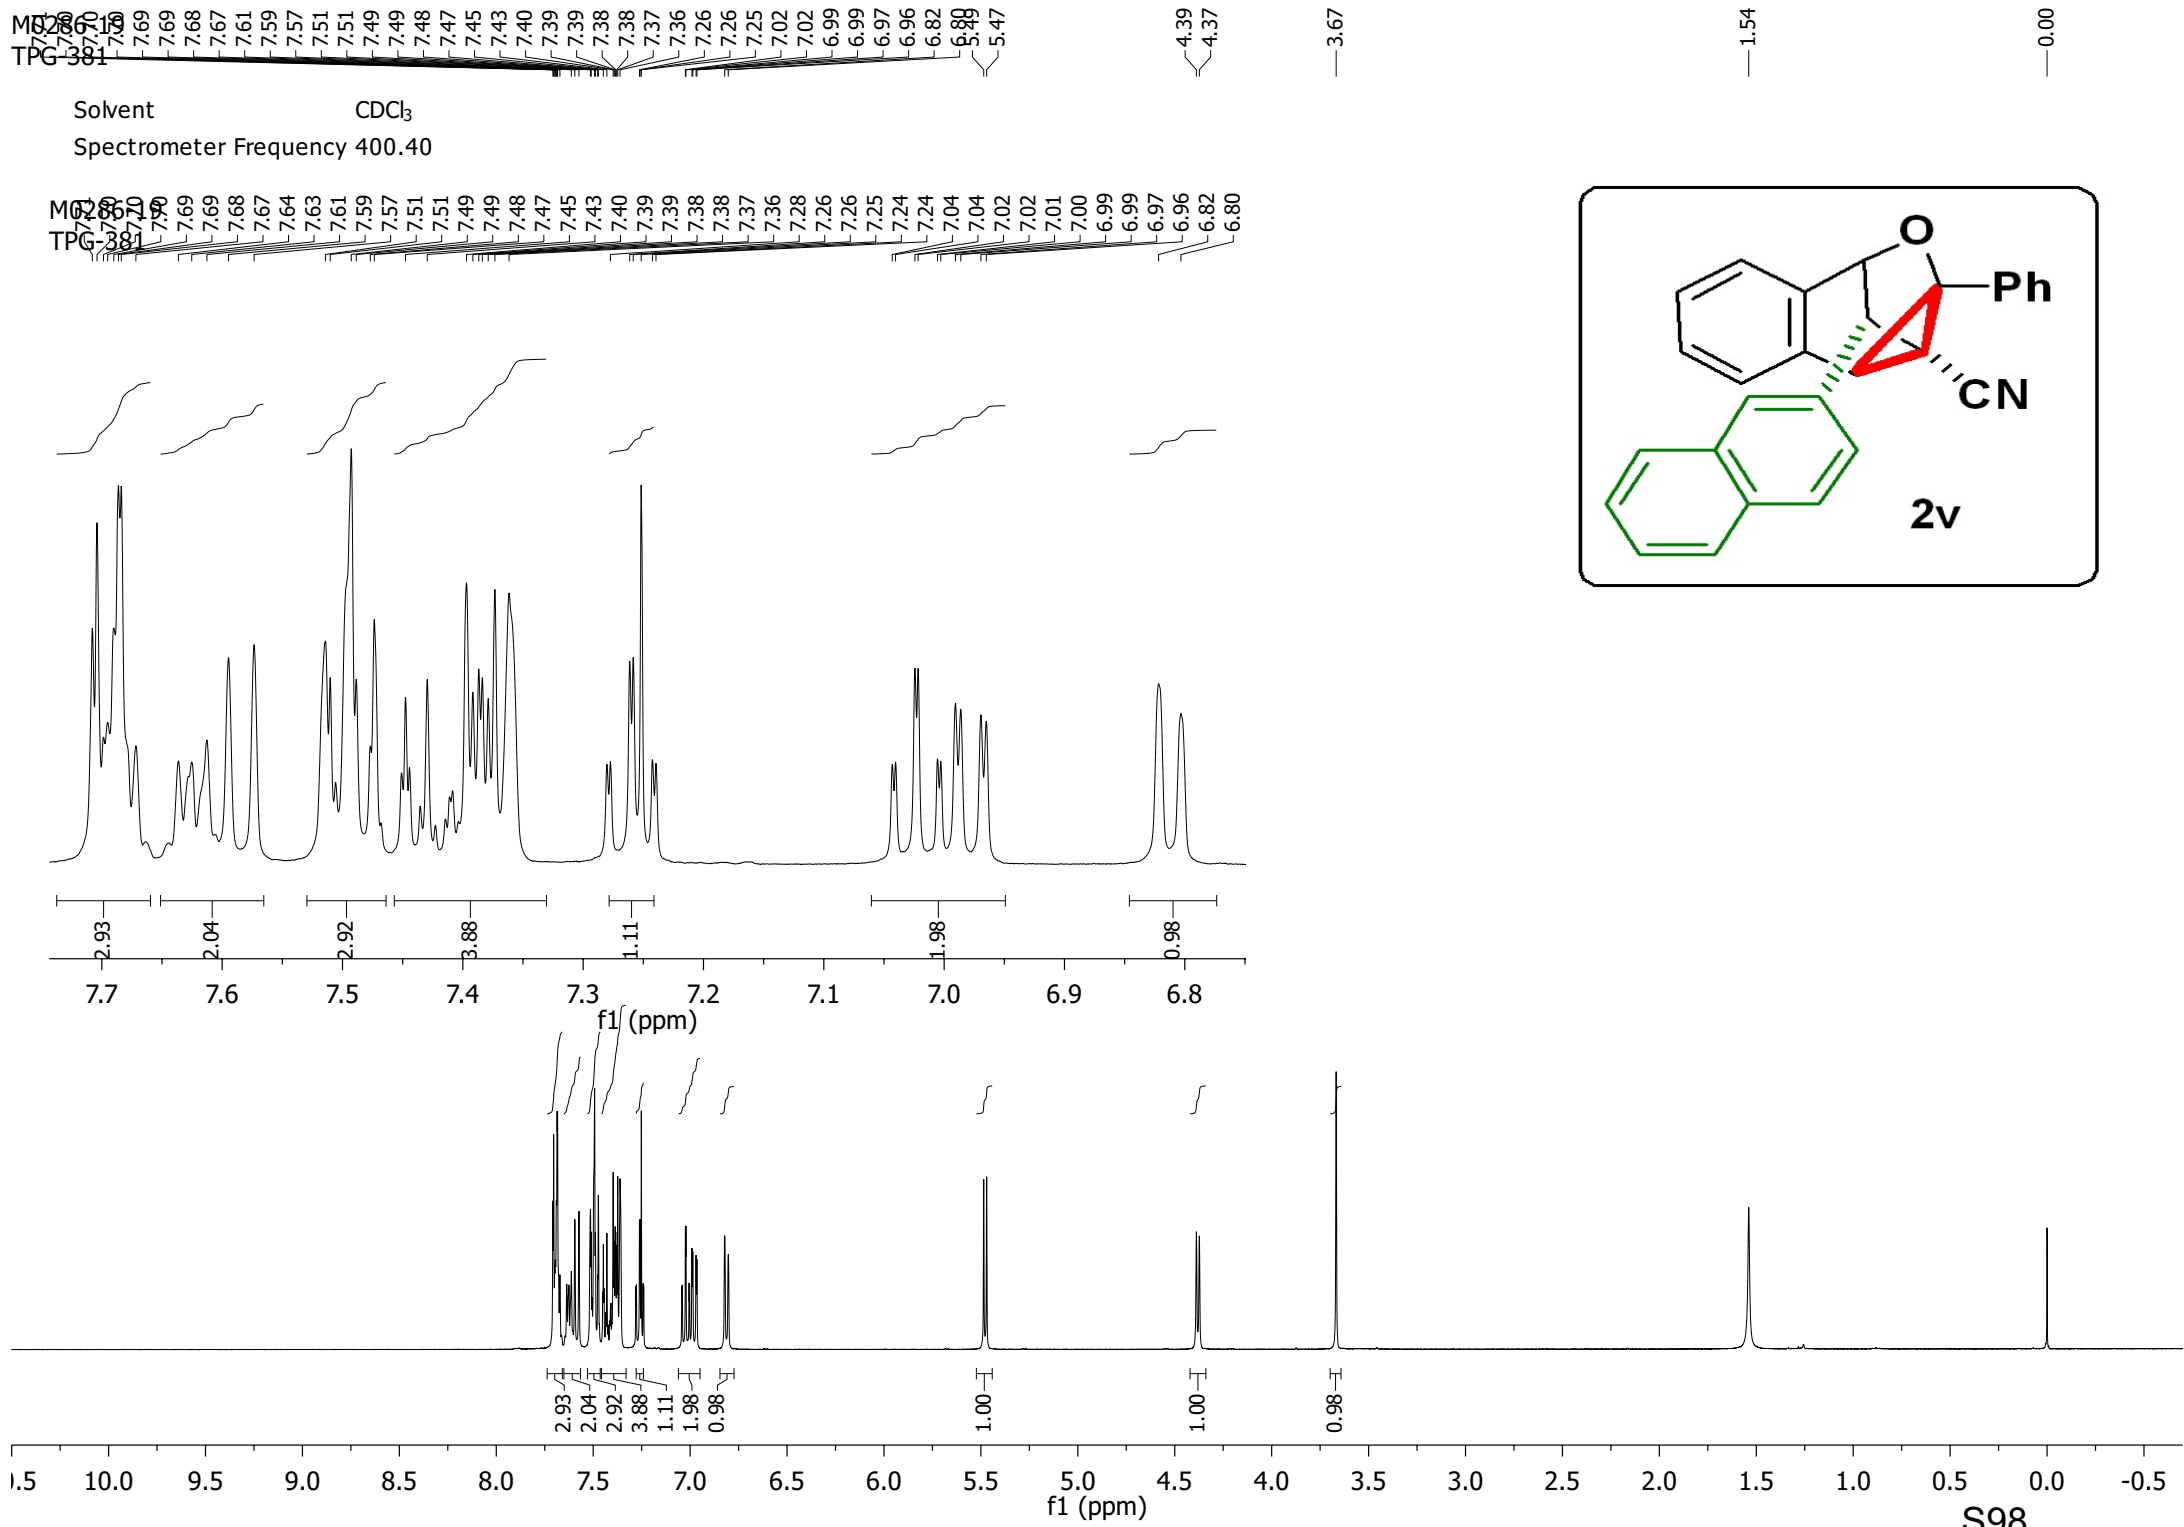

M0286-20  
TPG-381

Solvent  $\text{CDCl}_3$   
Spectrometer Frequency 100.69

133.07  
132.44  
132.26  
131.46  
130.21  
129.39  
128.98  
128.75  
128.73  
128.14  
127.66  
127.46  
127.10  
126.62  
126.45  
126.39  
126.12  
125.92  
125.24  
124.74  
118.54

79.13  
77.31  
76.99  
76.67  
69.55

47.12

31.14

24.18

M0286-20  
TPG-381  
133.20  
132.44  
132.26  
131.46  
130.21  
129.39  
128.98  
128.75  
128.73  
128.14  
127.66  
127.46  
127.10  
126.62  
126.45  
126.39  
126.12  
125.92  
125.24  
124.74

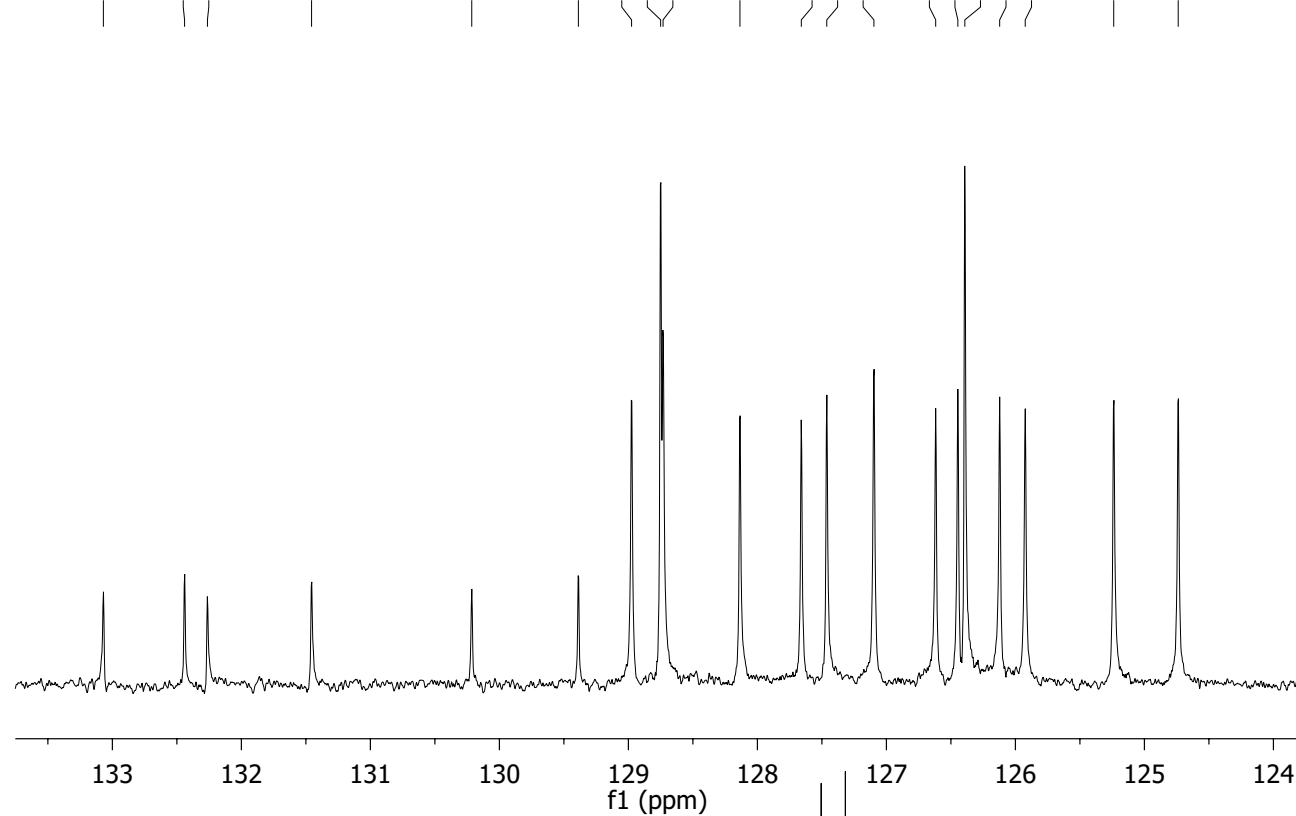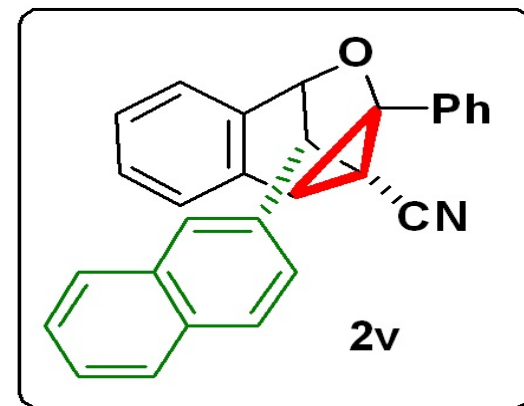

200  
190  
180  
170  
160  
150  
140  
130  
120  
110  
100  
90  
80  
70  
60  
50  
40  
30  
20  
10  
0  
f1 (ppm)

S99

M0262-7  
TPG-366

Solvent

CDCl<sub>3</sub>

Spectrometer Frequency 400.40

M0262-7  
TPG-366

7.59  
7.58  
7.57  
7.56  
7.42  
7.42  
7.42  
7.41  
7.40  
7.40  
7.40  
7.39  
7.34  
7.33  
7.26  
7.23  
7.22  
7.06  
7.05  
7.05  
7.04  
7.04  
6.99  
6.98  
6.81  
6.80  
6.79  
6.78  
5.20  
5.19

3.66  
3.65

2.80

1.56

1.25

-0.00

7.42  
7.42  
7.41  
7.40  
7.40  
7.40  
7.39  
7.34  
7.33  
7.26  
7.23  
7.22  
7.06  
7.05  
7.05  
7.04  
7.04  
6.99  
6.98  
6.81  
6.80  
6.79  
6.78

6.81  
6.80  
6.79  
6.78

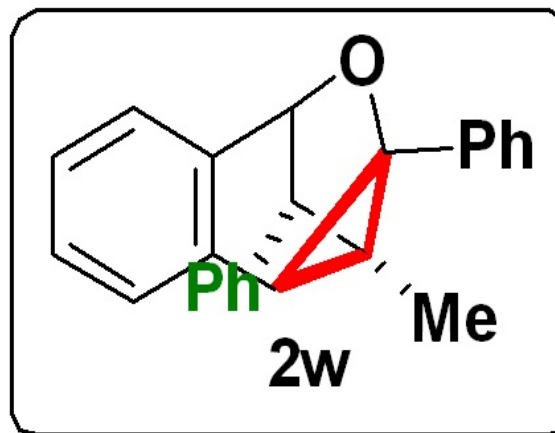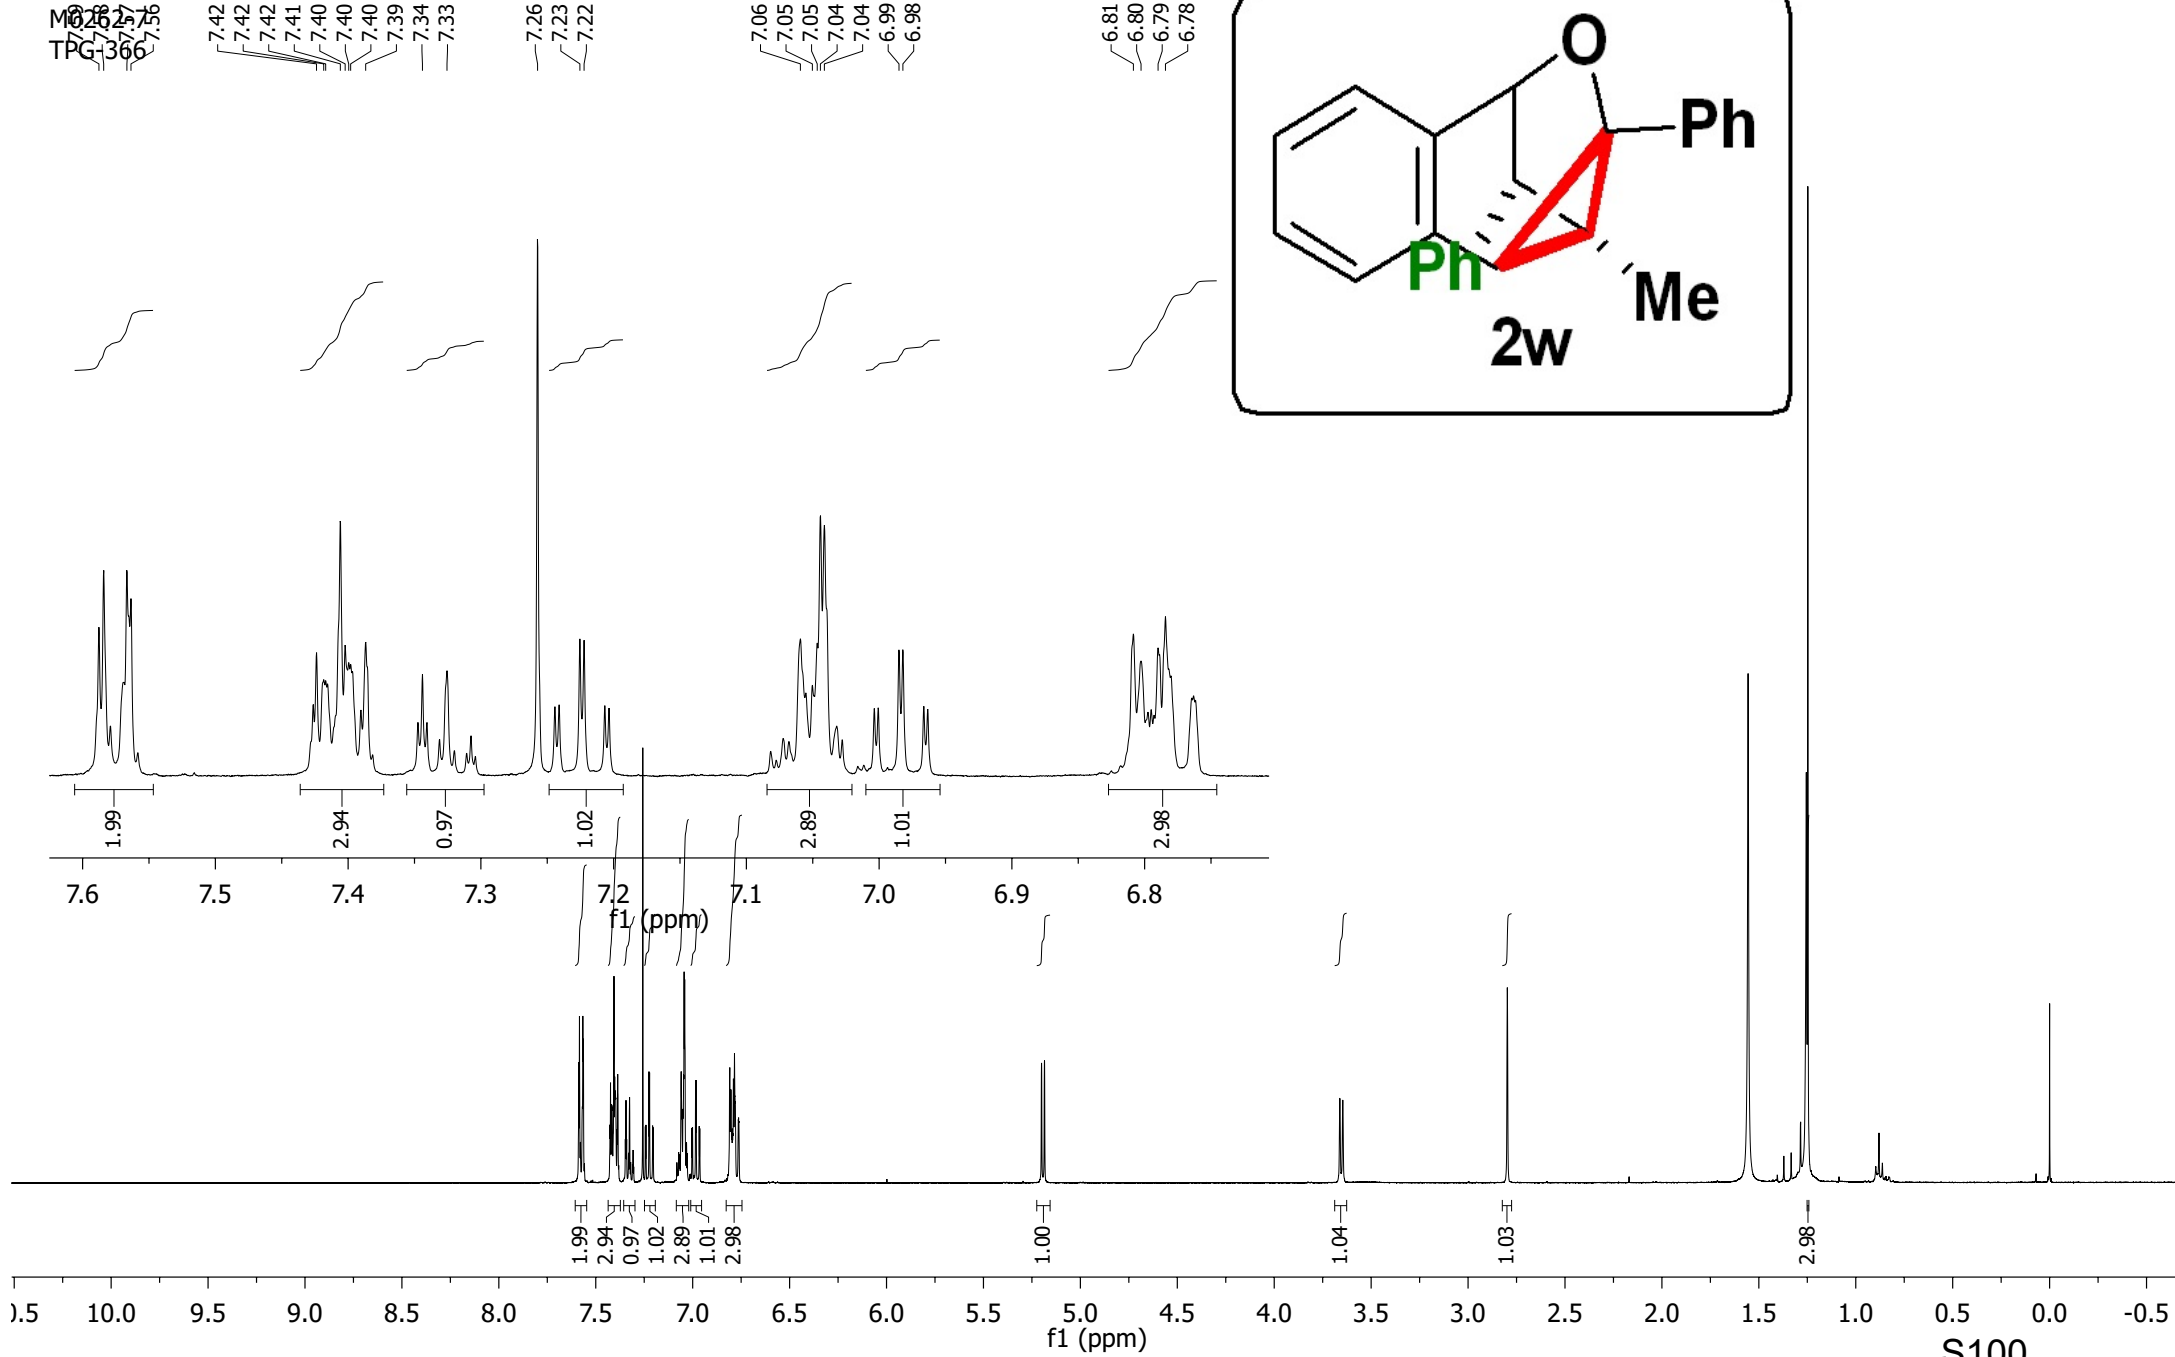

S100

M0262-8  
TPG-366

Solvent

$\text{CDCl}_3$

Spectrometer Frequency 100.69

135.65  
135.22  
134.37  
131.76  
128.41  
128.24  
127.90  
127.68  
127.64  
126.40  
125.63  
124.94  
124.35

79.30  
77.31  
76.99  
76.68

69.06

49.23

29.69  
29.29

13.78

M0262-8  
TPG-366

134.37

131.76

128.41

128.24

127.90

127.68

127.64

126.40

125.63

124.94

124.35



136 135 134 133 132 131 130 129 128 127 126 125 124

f1 (ppm)

210 200 190 180 170 160 150 140 130 120 110 100 90 80 70 60 50 40 30 20 10 0

f1 (ppm)

S101

U0311-4

TPG-383

Solvent

Spectrometer Frequency 400.28

CDCl<sub>3</sub>

7.57  
7.55  
7.46  
7.45  
7.43  
7.41  
7.39  
7.38  
7.37  
7.36  
7.35  
7.34  
7.33  
7.32  
7.29  
7.27  
7.25

5.17  
5.15

3.37

2.11  
2.09  
2.08  
2.07

1.56

0.47  
0.46  
0.45  
0.44  
0.34  
0.33  
0.32  
0.31  
0.30  
0.17  
0.16  
0.16  
0.15  
0.14  
-0.28  
-0.20

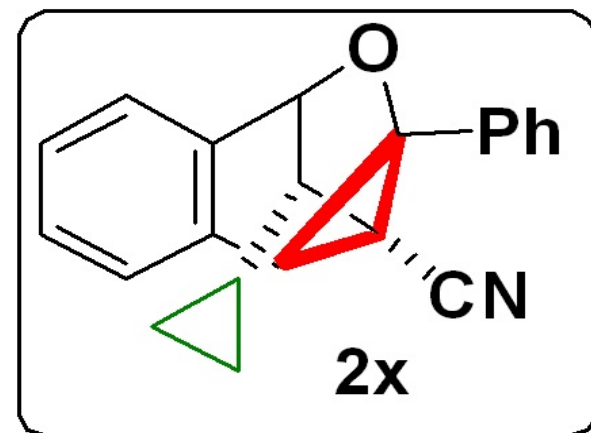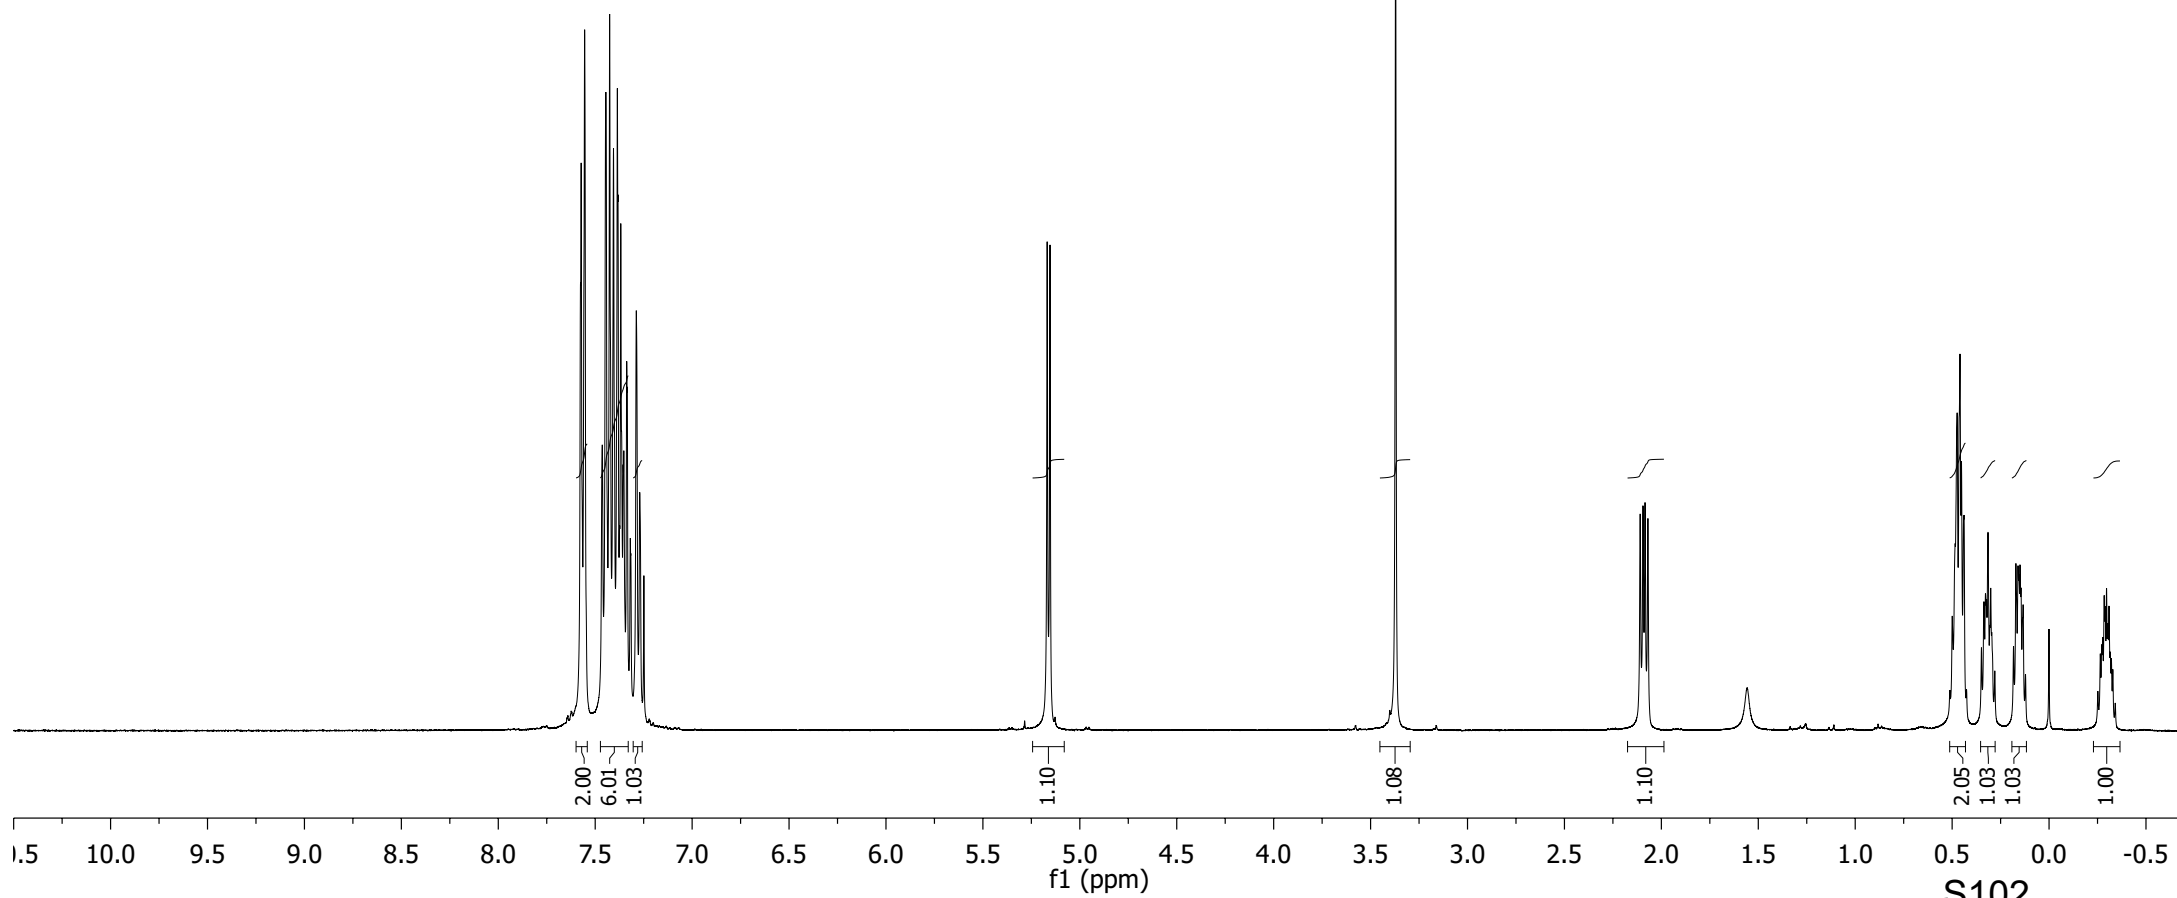

S102

U0311-6-1

Solvent

$\text{CDCl}_3$

Spectrometer Frequency 100.69

132.84  
132.48  
129.26  
128.66  
128.59  
126.90  
126.88  
126.13  
124.39  
118.88

77.80  
77.31  
76.99  
76.67  
69.59

47.87

30.72

24.09

6.58  
3.63  
2.34

U0311-6-1

132.84  
132.48

129.26  
128.66  
128.59

126.90  
126.88

126.13

124.39

118.88

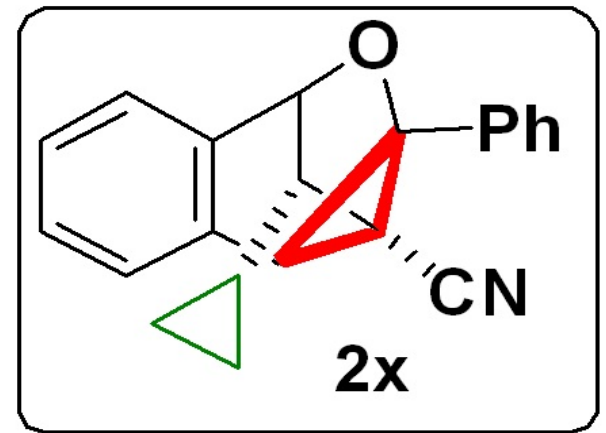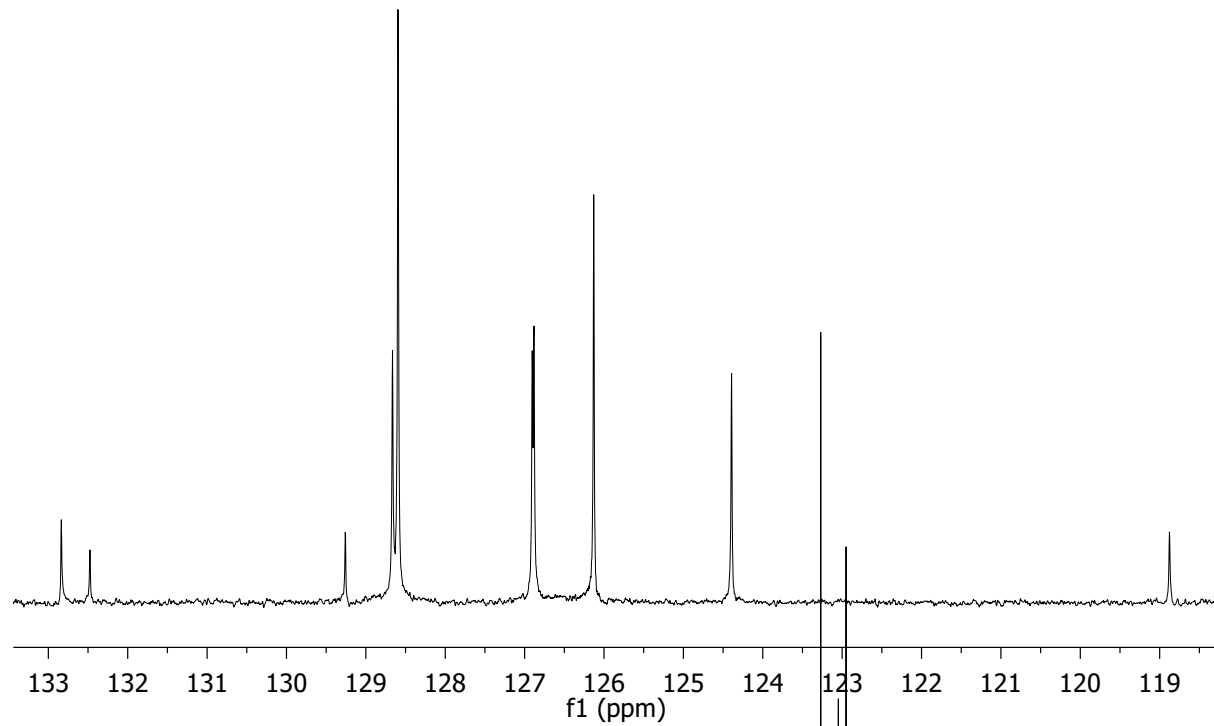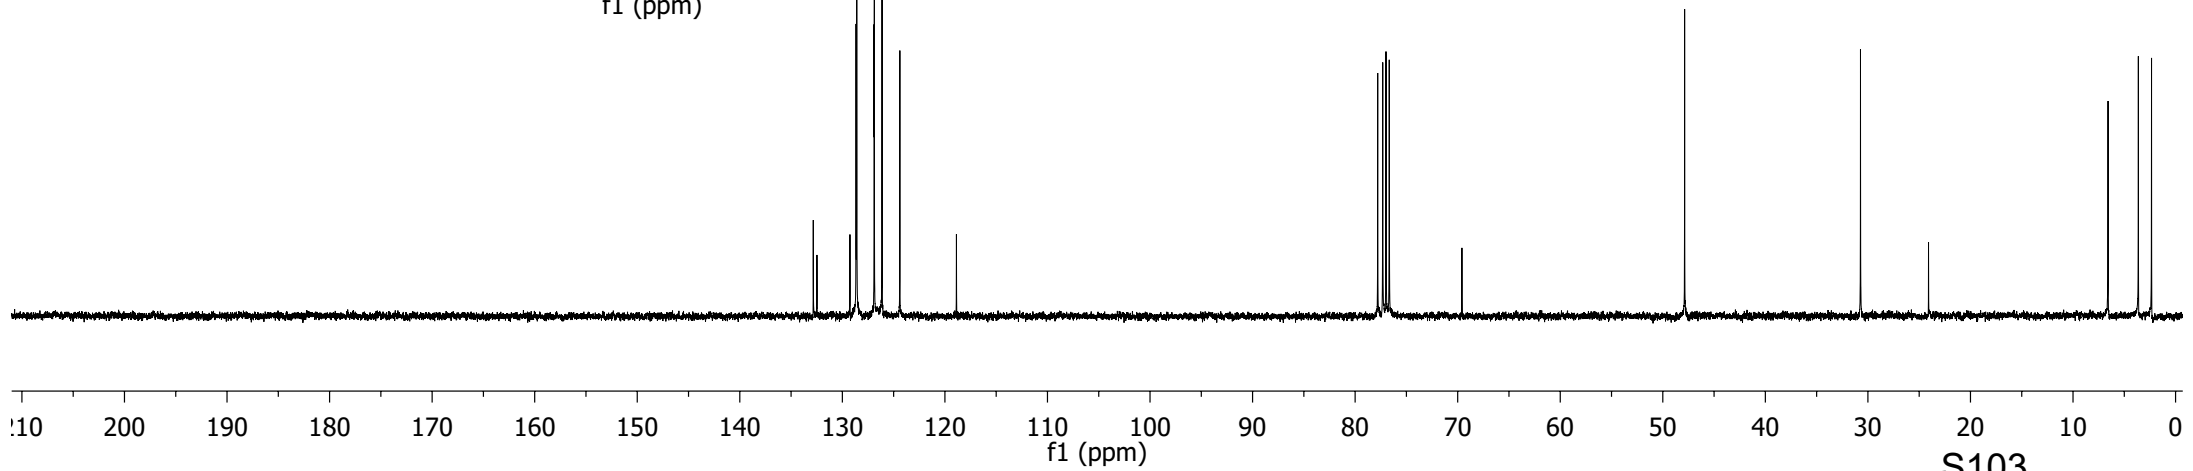

S103

Solvent  $\text{CDCl}_3$   
Spectrometer Frequency 400

8.67  
8.53  
8.53  
7.78  
7.77  
7.77  
7.76  
7.75  
7.75  
7.35  
7.33  
7.20  
7.20  
7.06  
7.04  
7.03  
7.03  
7.01  
7.01  
6.93  
6.93  
6.91  
6.85  
6.83  
5.32  
3.95  
3.94  
3.93  
3.93

2.94  
2.92  
2.63  
2.62  
2.61  
2.60

0.00

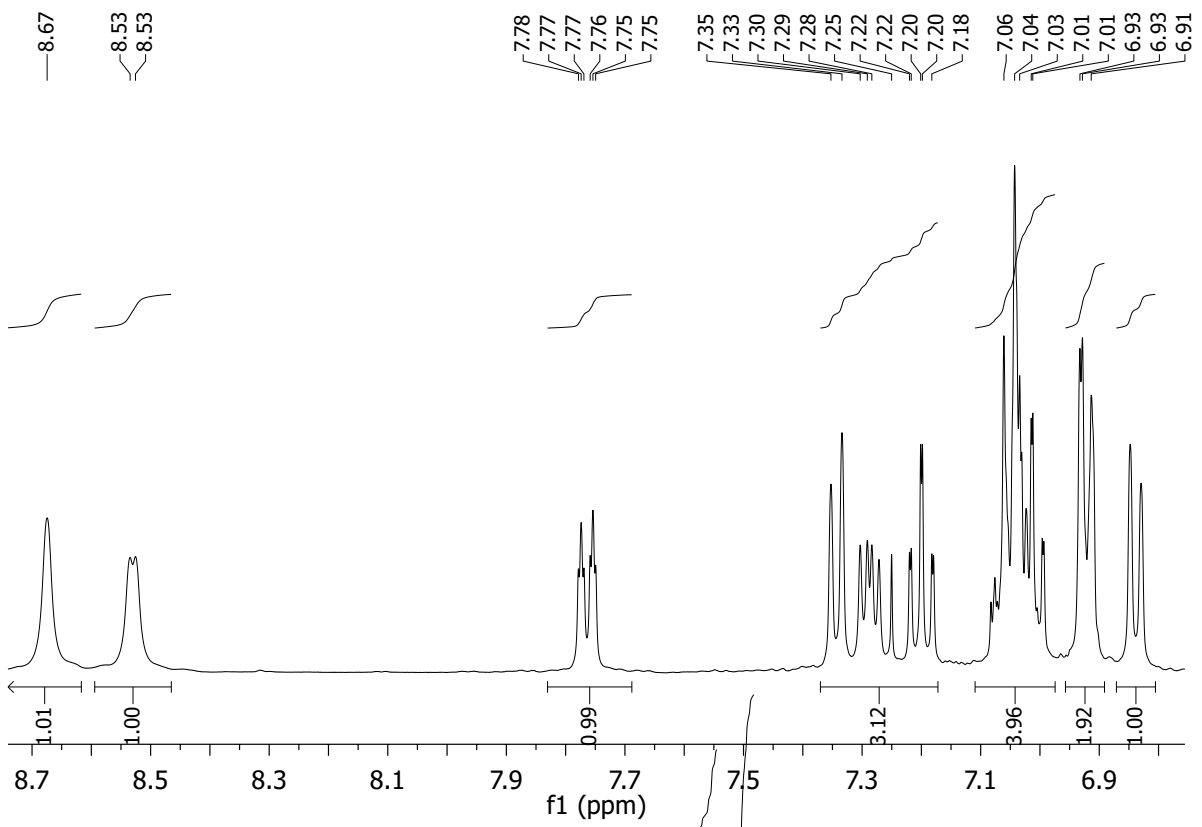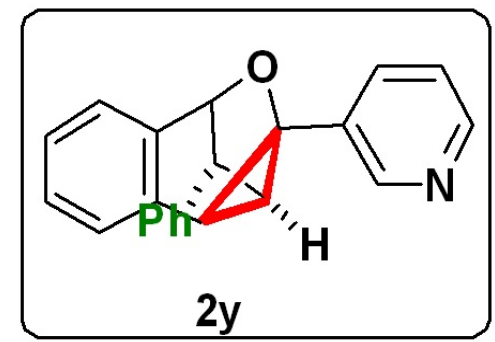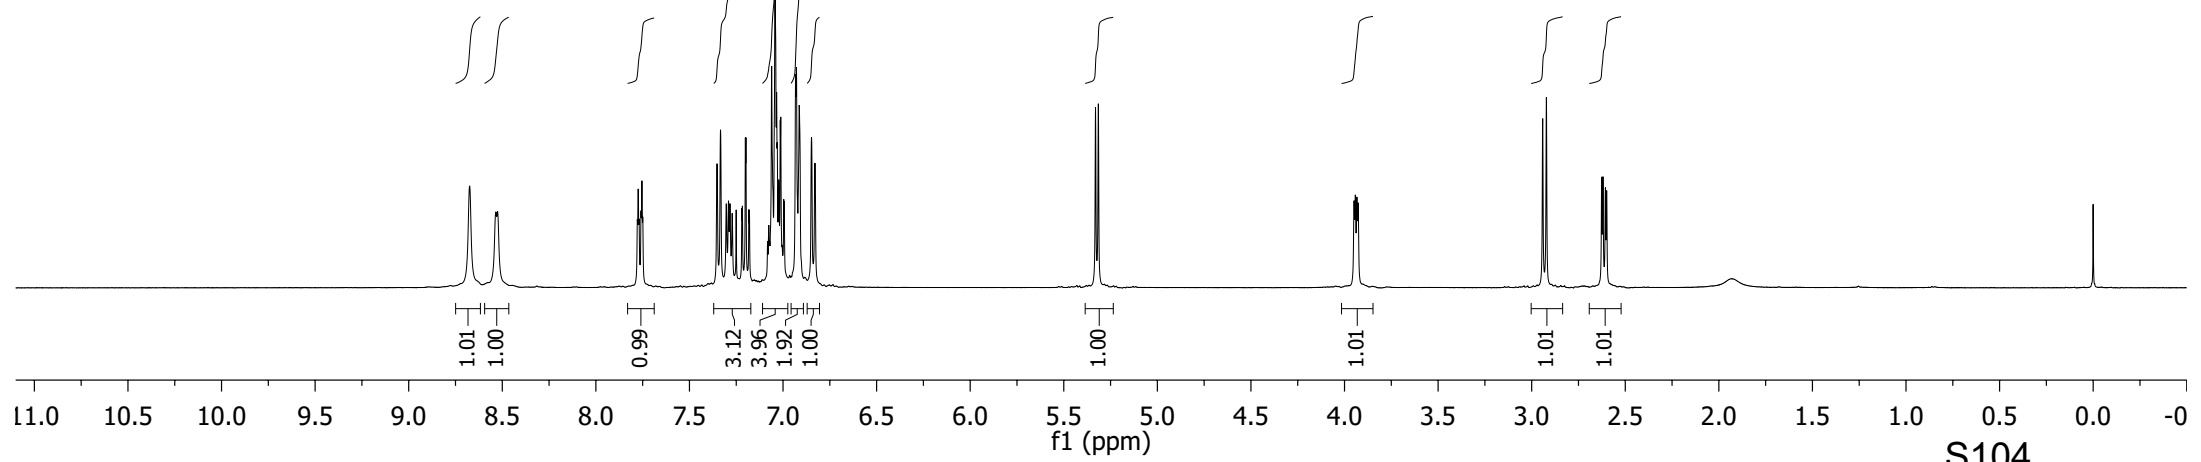



Solvent  $\text{CDCl}_3$   
Spectrometer Frequency 100

148.18  
146.45  
135.98  
133.88  
132.71  
132.37  
131.79  
127.93  
127.86  
127.73  
126.49  
125.94  
125.35  
124.28  
123.08

78.92  
77.31  
76.99  
76.68

63.71

43.31

27.41  
25.20

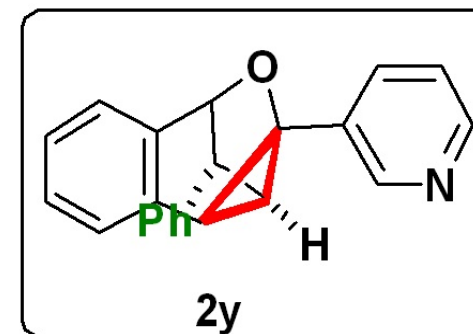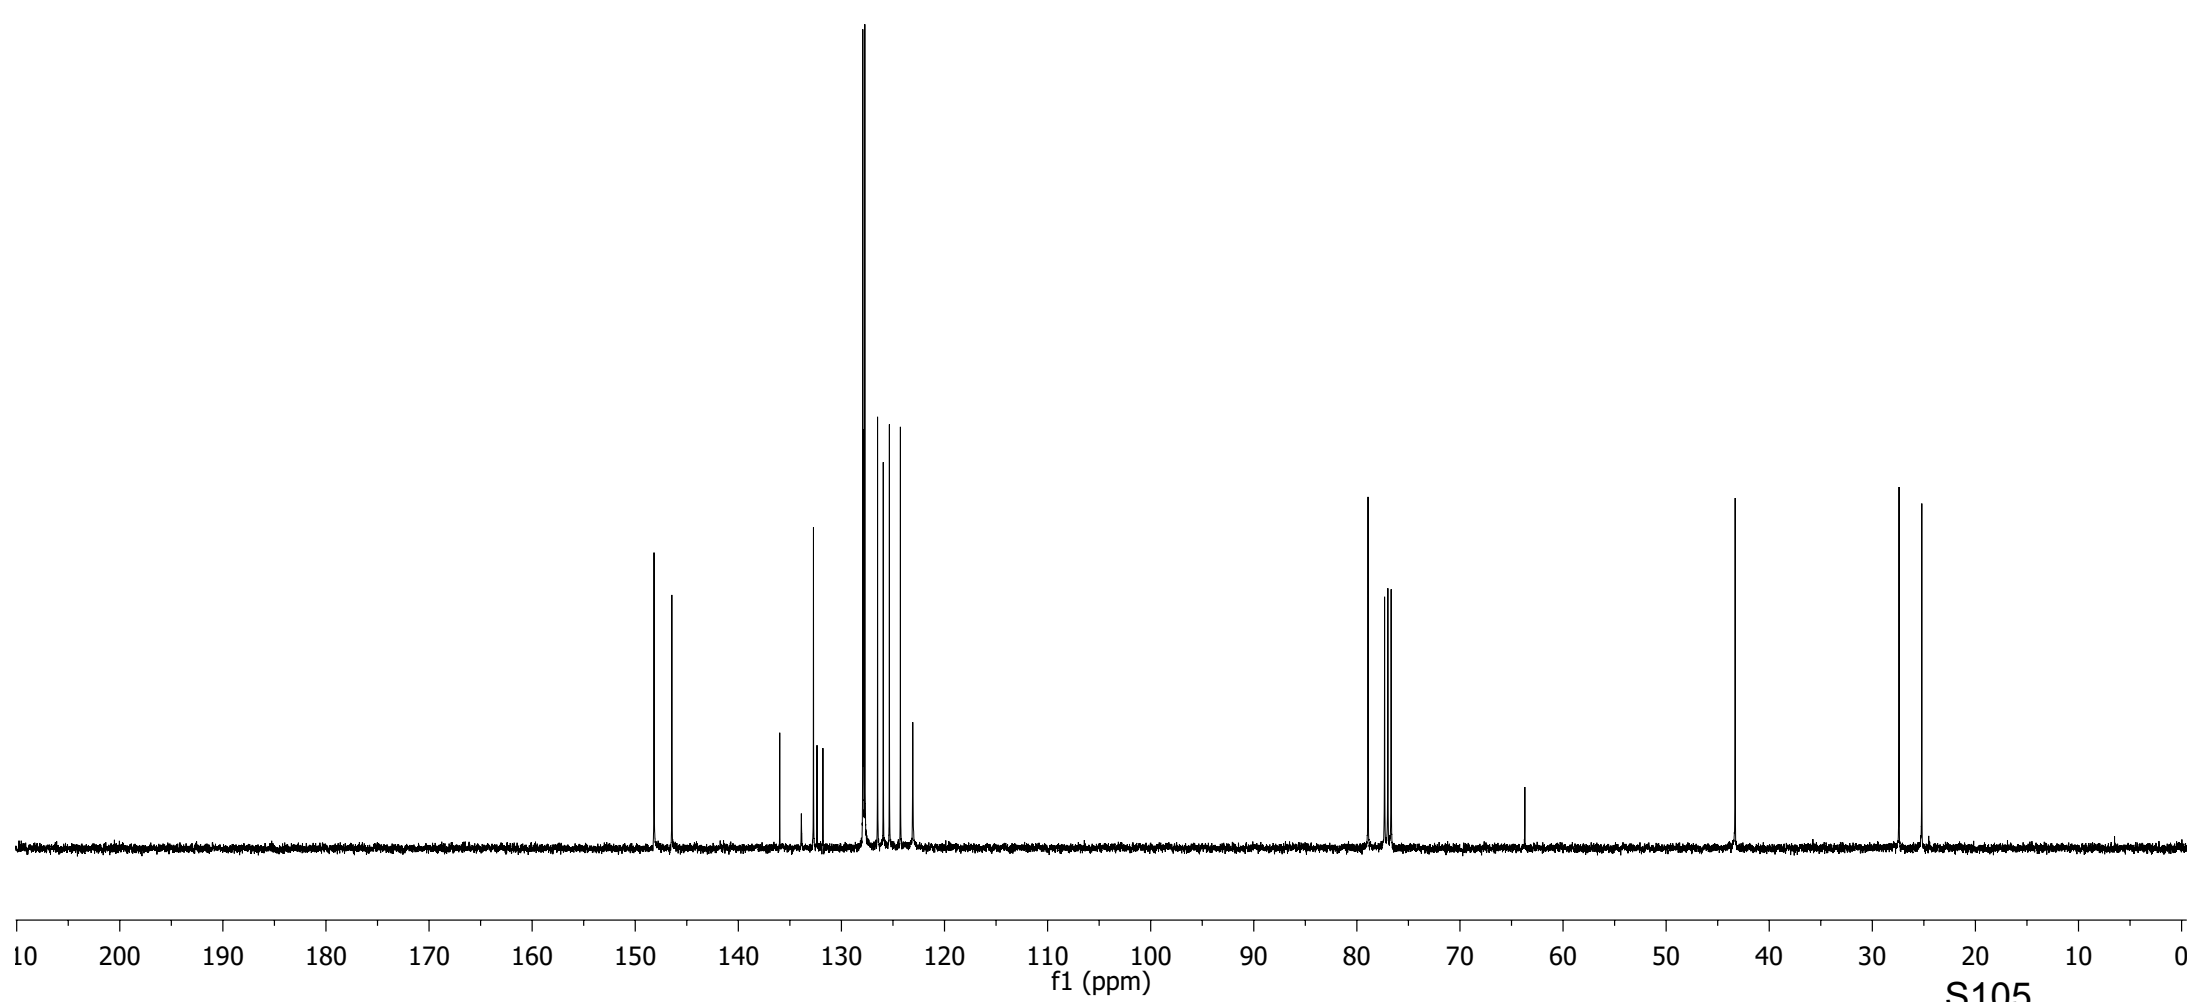

U0066-1  
TPG-412

Solvent CDCl<sub>3</sub>  
Spectrometer Frequency 400.28

7.84 7.82 7.82 7.47 7.38 7.36 7.34 7.25 7.08 7.01 6.99 6.97 6.96 6.94 6.81 6.81 5.90 4.95 4.92 4.41 4.39 4.38 4.36 4.35 3.94 3.91 3.88 3.75 3.74 3.61 3.50 3.43 3.34 3.30 3.27 3.11 3.10 3.07 3.06 1.56 0.00

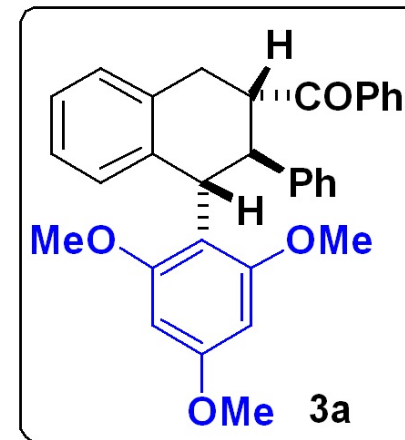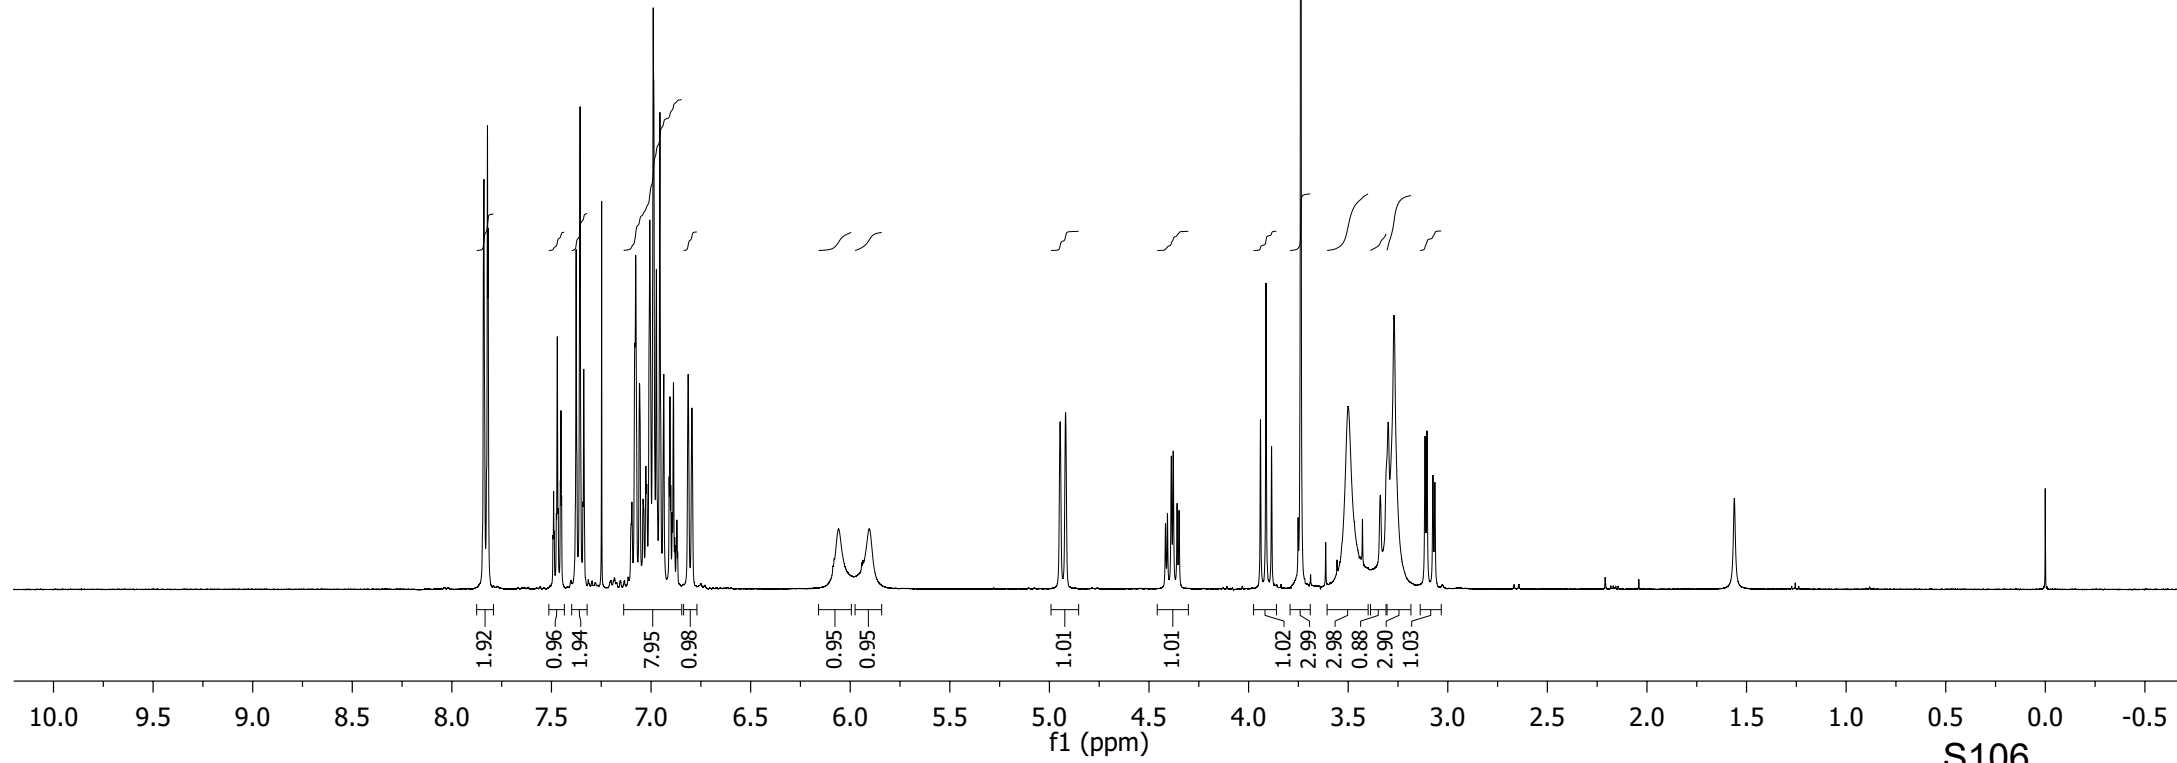

U0066-2  
TPG-412

Solvent  $\text{CDCl}_3$   
Spectrometer Frequency 100.66

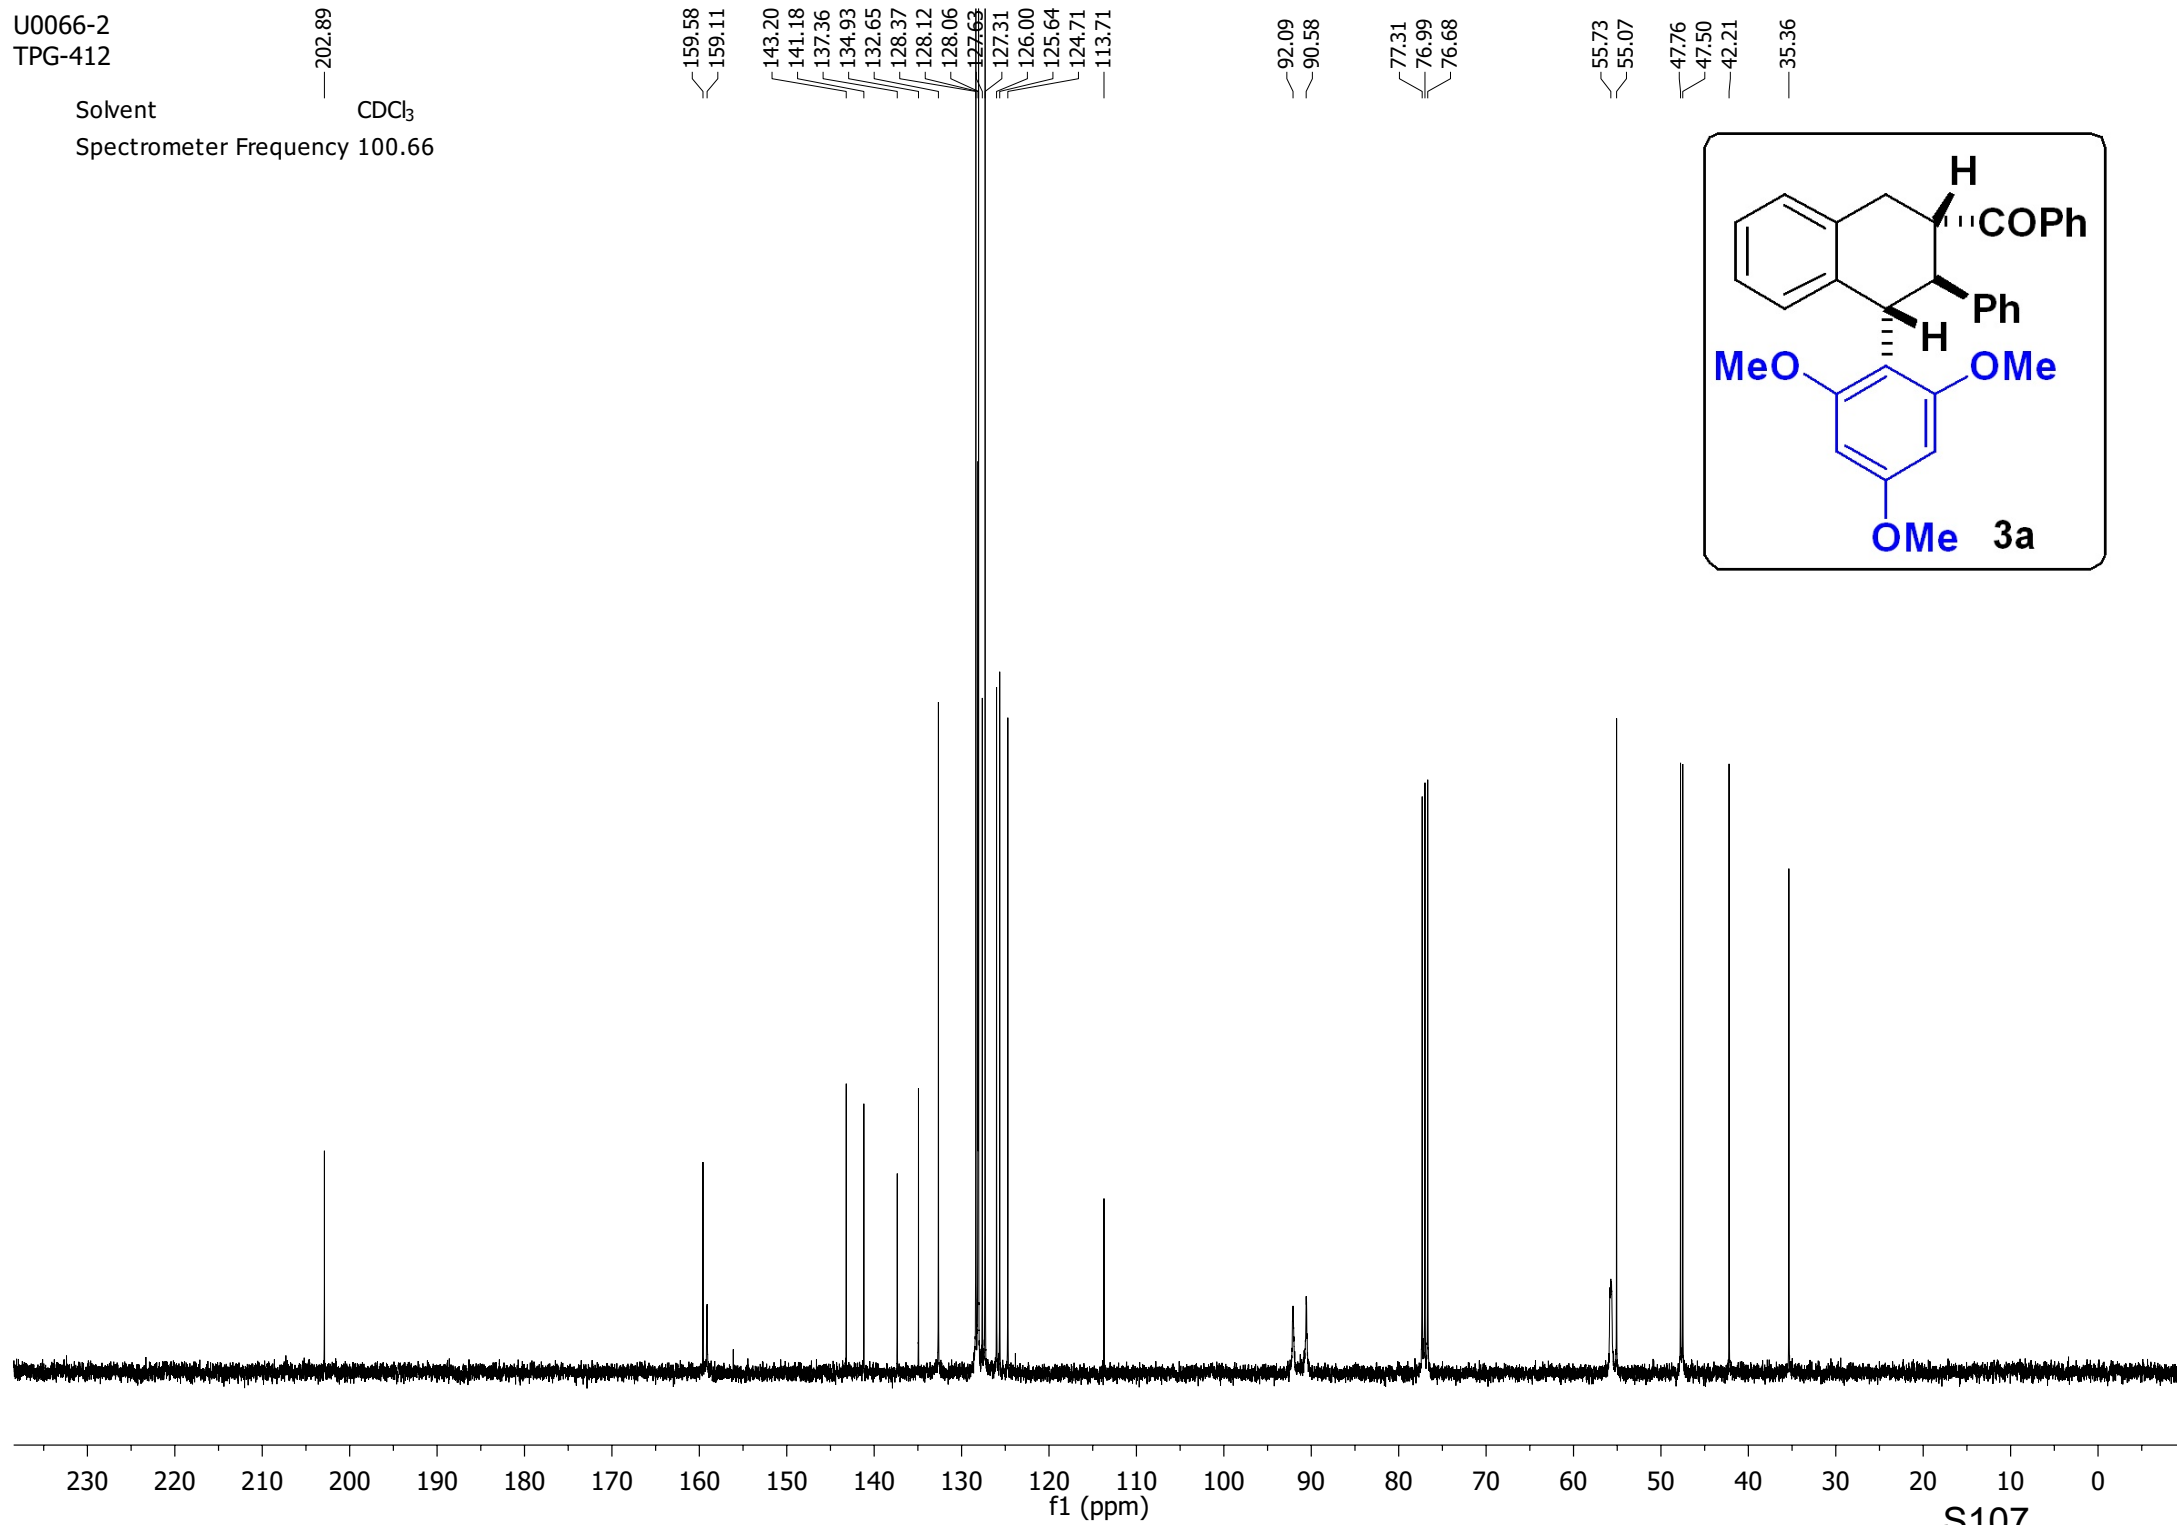

S107



V0038-15  
TPG-413

Solvent  $\text{CDCl}_3$   
Spectrometer Frequency 150

164.48  
143.97  
143.60  
131.15  
128.83  
128.59  
128.55  
127.22  
127.13  
126.84  
126.71  
118.17

100.96

84.01

77.20  
76.99  
76.78

60.59  
57.53

38.05

26.92  
26.34  
22.39

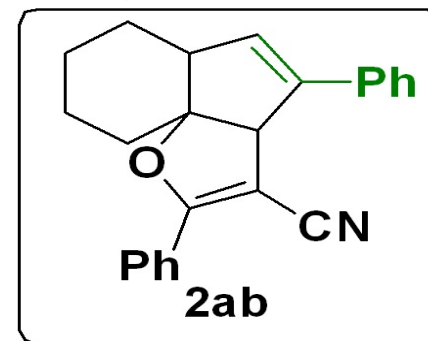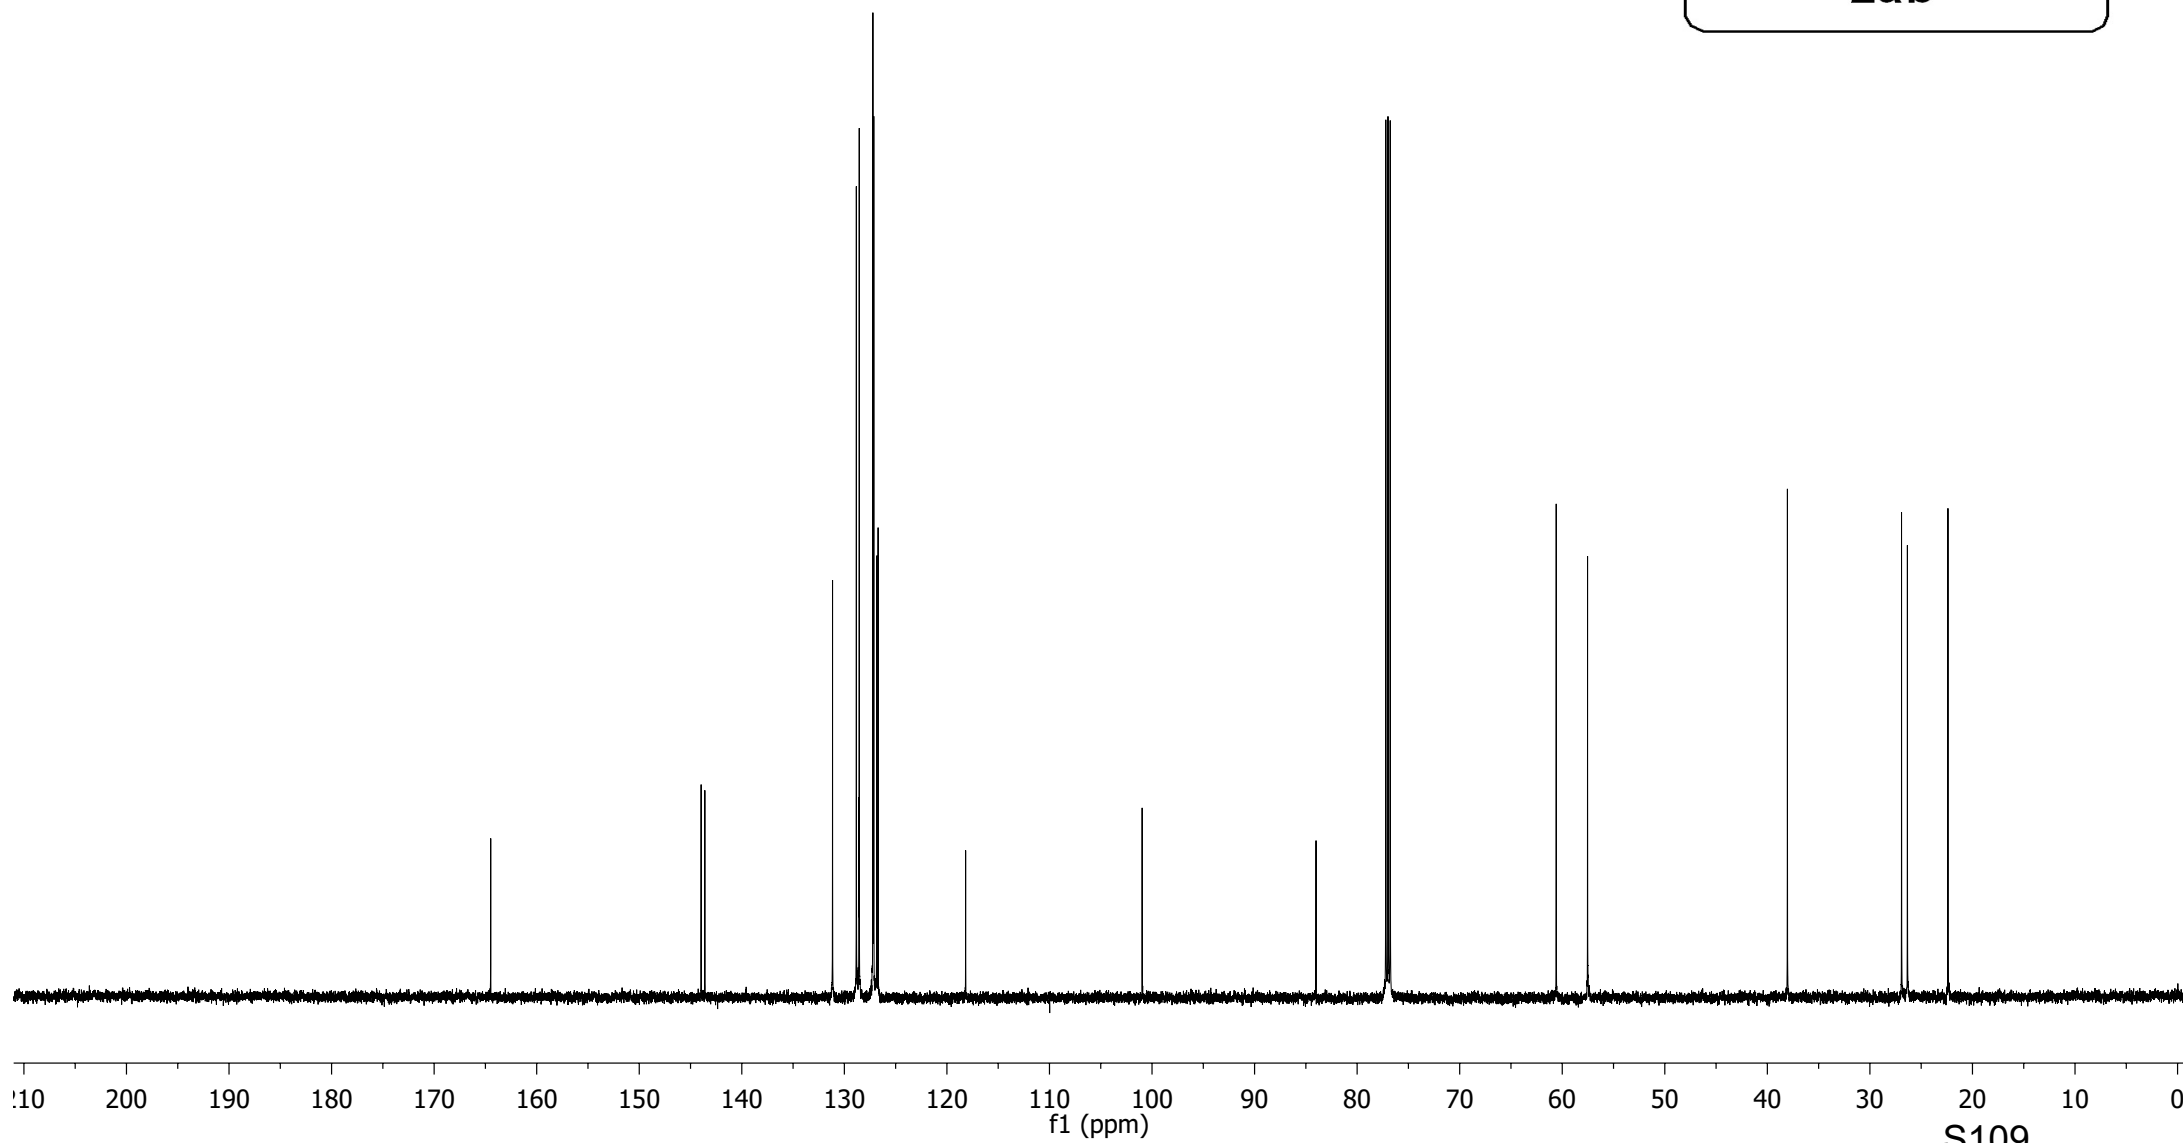

S109

7.85  
7.84  
7.83  
7.57  
7.56  
7.55  
7.54  
7.54  
7.53  
7.53  
7.51  
7.48  
7.47  
7.45  
7.44  
7.43  
7.39  
7.39  
7.38  
7.37  
7.36  
7.35  
7.32  
7.32  
7.31  
7.26  
7.23  
7.22  
7.22  
7.21  
7.20  
7.19  
7.16  
7.16  
7.16  
7.15  
7.14  
7.12  
7.08  
7.07  
4.95  
4.76  
4.76  
4.75  
4.74  
4.73  
4.41  
4.40  
4.02  
4.01  
3.76  
3.73  
3.40  
3.39  
3.38  
3.37  
3.36  
3.36  
3.34  
3.13  
3.13  
3.12  
3.11  
3.10  
3.08  
1.07  
0.97  
0.96  
0.94

Solvent CDCl<sub>3</sub>  
Spectrometer Frequency 400

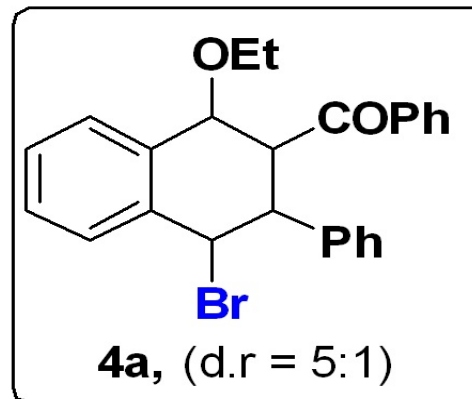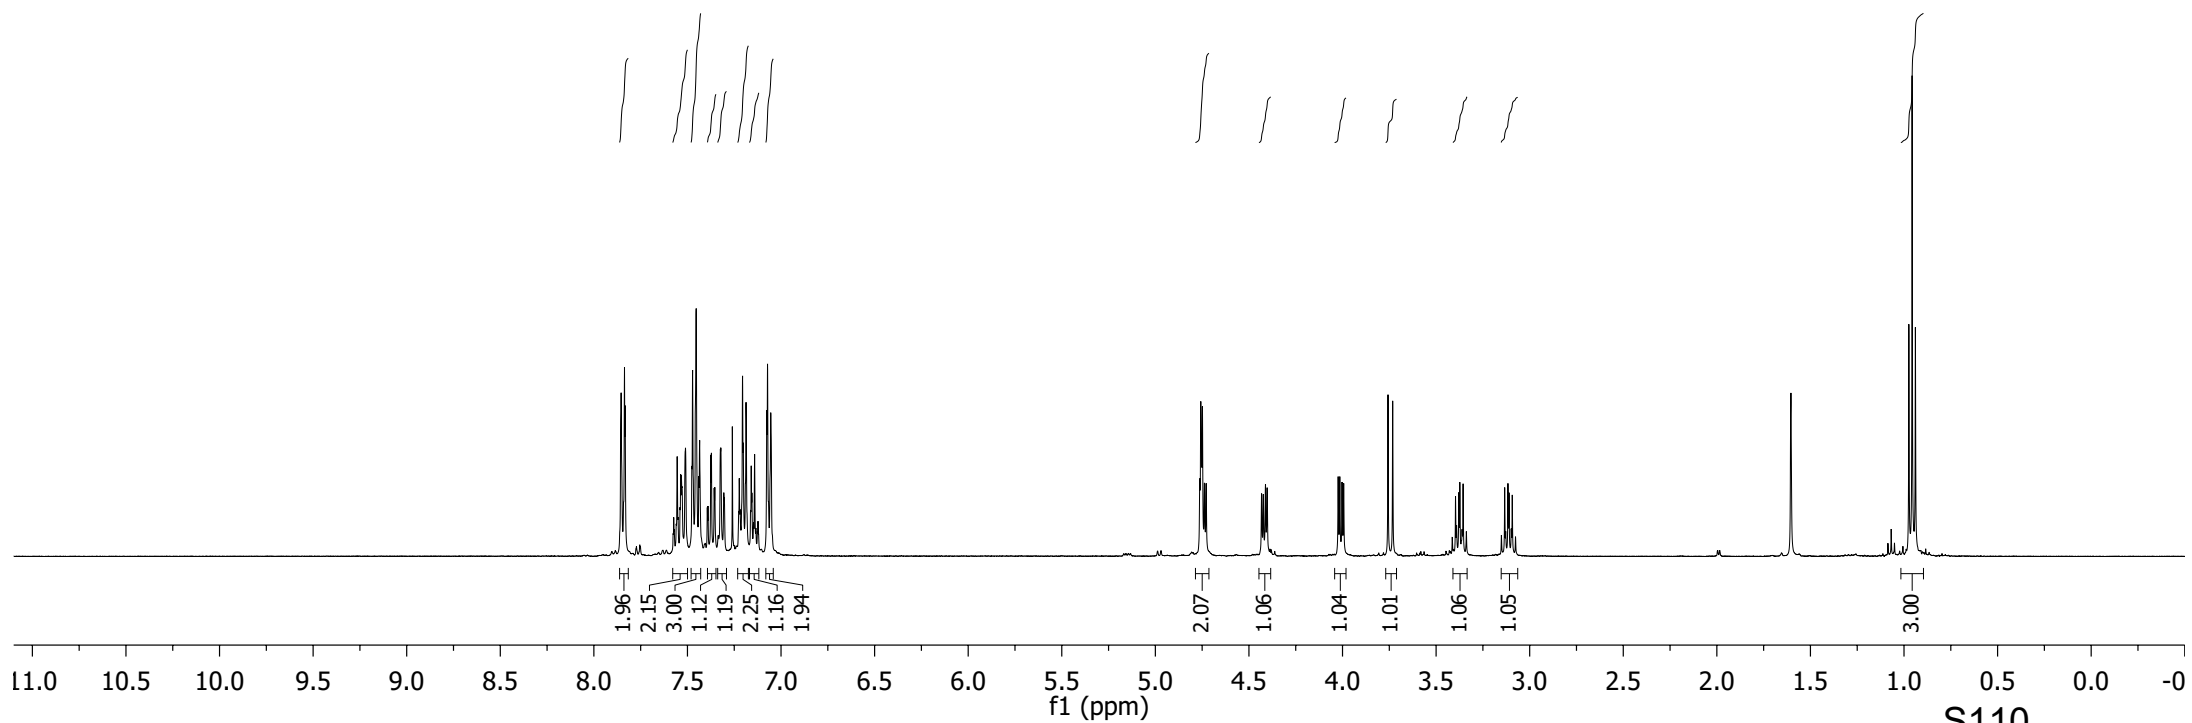

Solvent  $\text{CDCl}_3$   
Spectrometer Frequency 100.66

144.48  
139.83  
137.04  
135.23  
132.69  
129.76  
129.08  
128.69  
128.66  
128.49  
127.97  
127.71  
127.56  
126.51

77.85  
77.32  
77.00  
76.68  
74.72

64.56

55.32

45.79

14.74

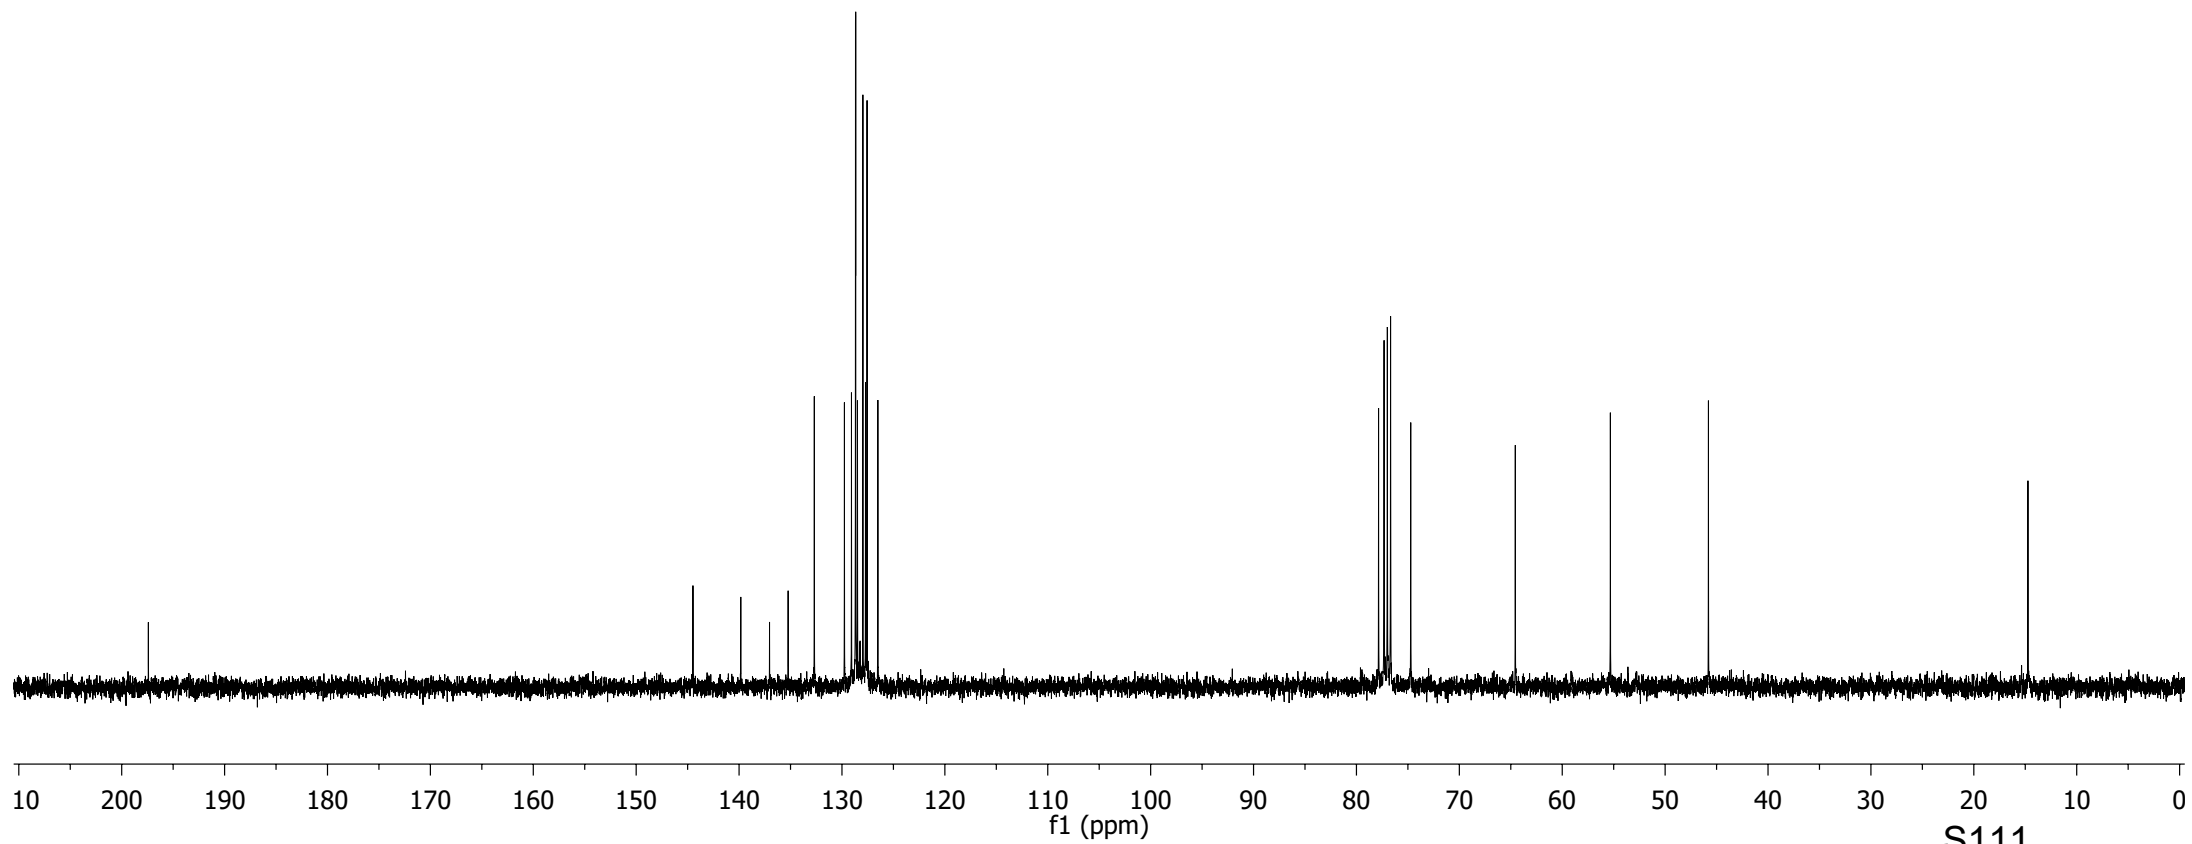

S111





---

The following ALERTS were generated. Each ALERT has the format

**test-name\_ALERT\_alert-type\_alert-level.**

Click on the hyperlinks for more details of the test.

---

### Alert level G

|                   |                                                  |               |             |
|-------------------|--------------------------------------------------|---------------|-------------|
| PLAT003_ALERT_2_G | Number of Uiso or Uij Restrained non-H Atoms ... | 24            | Report      |
| PLAT005_ALERT_5_G | No Embedded Refinement Details Found in the CIF  |               | Please Do ! |
| PLAT398_ALERT_2_G | Deviating C-O-C Angle From 120 for O1            | 105.1         | Degree      |
| PLAT793_ALERT_4_G | Model has Chirality at C1                        | (Centro SPGR) | S Verify    |
| PLAT793_ALERT_4_G | Model has Chirality at C8                        | (Centro SPGR) | R Verify    |
| PLAT793_ALERT_4_G | Model has Chirality at C9                        | (Centro SPGR) | R Verify    |
| PLAT793_ALERT_4_G | Model has Chirality at C16                       | (Centro SPGR) | R Verify    |
| PLAT793_ALERT_4_G | Model has Chirality at C17                       | (Centro SPGR) | S Verify    |
| PLAT860_ALERT_3_G | Number of Least-Squares Restraints .....         | 684           | Note        |

---

- 0 **ALERT level A** = Most likely a serious problem - resolve or explain
- 0 **ALERT level B** = A potentially serious problem, consider carefully
- 0 **ALERT level C** = Check. Ensure it is not caused by an omission or oversight
- 9 **ALERT level G** = General information/check it is not something unexpected

- 0 ALERT type 1 CIF construction/syntax error, inconsistent or missing data
  - 2 ALERT type 2 Indicator that the structure model may be wrong or deficient
  - 1 ALERT type 3 Indicator that the structure quality may be low
  - 5 ALERT type 4 Improvement, methodology, query or suggestion
  - 1 ALERT type 5 Informative message, check
- 

## checkCIF publication errors

---

### Alert level A

PUBL004\_ALERT\_1\_A The contact author's name and address are missing,  
\_publ\_contact\_author\_name and \_publ\_contact\_author\_address.

PUBL005\_ALERT\_1\_A \_publ\_contact\_author\_email, \_publ\_contact\_author\_fax and  
\_publ\_contact\_author\_phone are all missing.  
At least one of these should be present.

PUBL006\_ALERT\_1\_A \_publ\_requested\_journal is missing  
e.g. 'Acta Crystallographica Section C'

PUBL008\_ALERT\_1\_A \_publ\_section\_title is missing. Title of paper.

PUBL009\_ALERT\_1\_A \_publ\_author\_name is missing. List of author(s) name(s).

PUBL010\_ALERT\_1\_A \_publ\_author\_address is missing. Author(s) address(es).

PUBL012\_ALERT\_1\_A \_publ\_section\_abstract is missing.  
Abstract of paper in English.

---

- 7 **ALERT level A** = Data missing that is essential or data in wrong format
  - 0 **ALERT level G** = General alerts. Data that may be required is missing
-

## Publication of your CIF

You should attempt to resolve as many as possible of the alerts in all categories. Often the minor alerts point to easily fixed oversights, errors and omissions in your CIF or refinement strategy, so attention to these fine details can be worthwhile. In order to resolve some of the more serious problems it may be necessary to carry out additional measurements or structure refinements. However, the nature of your study may justify the reported deviations from journal submission requirements and the more serious of these should be commented upon in the discussion or experimental section of a paper or in the "special\_details" fields of the CIF. *checkCIF* was carefully designed to identify outliers and unusual parameters, but every test has its limitations and alerts that are not important in a particular case may appear. Conversely, the absence of alerts does not guarantee there are no aspects of the results needing attention. It is up to the individual to critically assess their own results and, if necessary, seek expert advice.

If level A alerts remain, which you believe to be justified deviations, and you intend to submit this CIF for publication in a journal, you should additionally insert an explanation in your CIF using the Validation Reply Form (VRF) below. This will allow your explanation to be considered as part of the review process.

## Validation response form

Please find below a validation response form (VRF) that can be filled in and pasted into your CIF.

```
# start Validation Reply Form
_vrf_PUBL004_GLOBAL
;
PROBLEM: The contact author's name and address are missing,
RESPONSE: ...
;
_vrf_PUBL005_GLOBAL
;
PROBLEM: _publ_contact_author_email, _publ_contact_author_fax and
RESPONSE: ...
;
_vrf_PUBL006_GLOBAL
;
PROBLEM: _publ_requested_journal is missing
RESPONSE: ...
;
_vrf_PUBL008_GLOBAL
;
PROBLEM: _publ_section_title is missing. Title of paper.
RESPONSE: ...
;
_vrf_PUBL009_GLOBAL
;
PROBLEM: _publ_author_name is missing. List of author(s) name(s).
RESPONSE: ...
;
_vrf_PUBL010_GLOBAL
;
PROBLEM: _publ_author_address is missing. Author(s) address(es).
```

```
RESPONSE: ...
;
_vrf_PUBL012_GLOBAL
;
PROBLEM: _publ_section_abstract is missing.
RESPONSE: ...
;
# end Validation Reply Form
```

If you wish to submit your CIF for publication in Acta Crystallographica Section C or E, you should upload your CIF via the web. If you wish to submit your CIF for publication in IUCrData you should upload your CIF via the web. If your CIF is to form part of a submission to another IUCr journal, you will be asked, either during electronic submission or by the Co-editor handling your paper, to upload your CIF via our web site.

---

**PLATON version of 13/07/2021; check.def file version of 13/07/2021**

Datablock I - ellipsoid plot

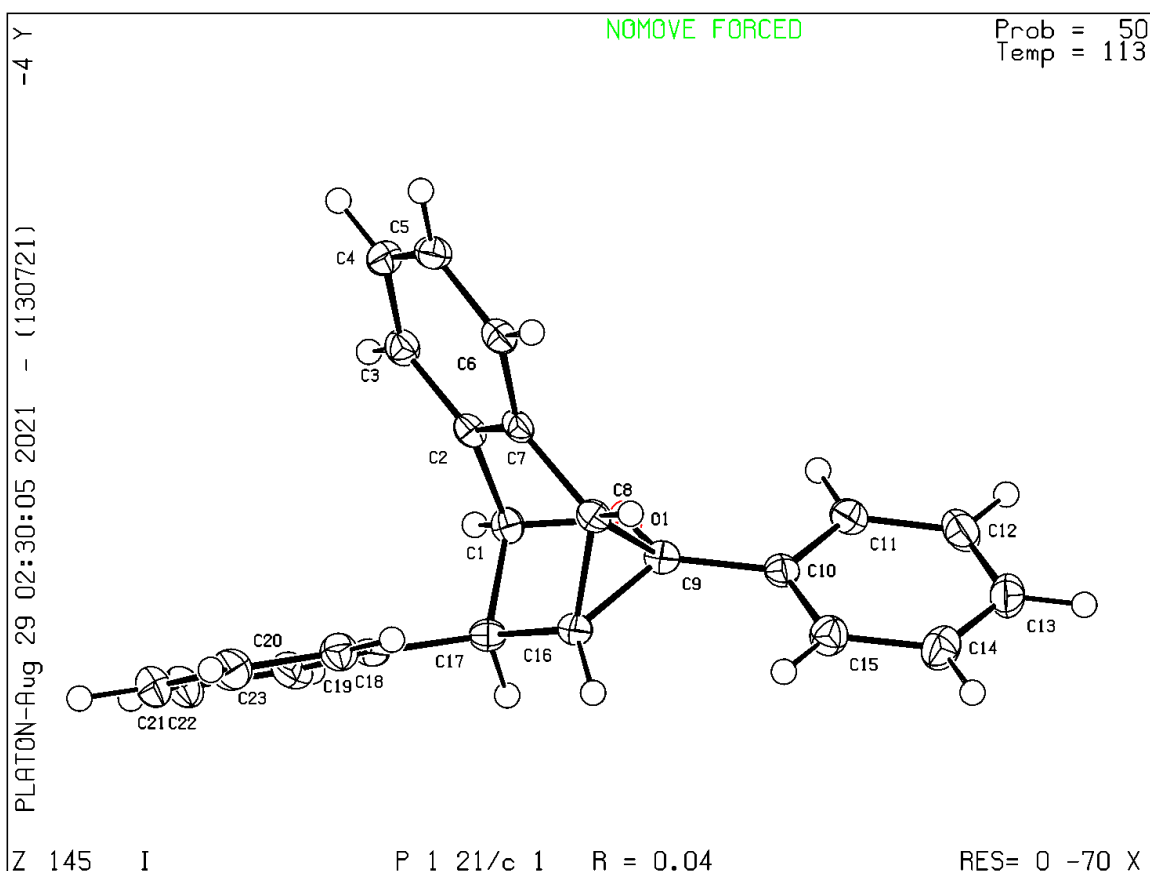

## checkCIF/PLATON report

You have not supplied any structure factors. As a result the full set of tests cannot be run.

THIS REPORT IS FOR GUIDANCE ONLY. IF USED AS PART OF A REVIEW PROCEDURE FOR PUBLICATION, IT SHOULD NOT REPLACE THE EXPERTISE OF AN EXPERIENCED CRYSTALLOGRAPHIC REFEREE.

No syntax errors found.      CIF dictionary      Interpreting this report

### Datablock: I

---

|                 |                |                    |              |
|-----------------|----------------|--------------------|--------------|
| Bond precision: | C-C = 0.0022 A | Wavelength=0.71073 |              |
| Cell:           | a=8.2282(3)    | b=14.8841(7)       | c=14.9762(5) |
|                 | alpha=90       | beta=101.424(3)    | gamma=90     |
| Temperature:    | 113 K          |                    |              |
|                 | Calculated     | Reported           |              |
| Volume          | 1797.79(12)    | 1797.79(12)        |              |
| Space group     | P 21/c         | P 1 21/c 1         |              |
| Hall group      | -P 2ybc        | -P 2ybc            |              |
| Moiety formula  | C24 H16 Cl N O | 2(C24 H16 Cl N O)  |              |
| Sum formula     | C24 H16 Cl N O | C48 H32 Cl2 N2 O2  |              |
| Mr              | 369.83         | 739.65             |              |
| Dx,g cm-3       | 1.366          | 1.366              |              |
| Z               | 4              | 2                  |              |
| Mu (mm-1)       | 0.226          | 0.226              |              |
| F000            | 768.0          | 768.0              |              |
| F000'           | 768.88         |                    |              |
| h,k,lmax        | 9,17,17        | 9,17,17            |              |
| Nref            | 3165           | 3163               |              |
| Tmin,Tmax       | 0.917,0.934    | 0.554,1.000        |              |
| Tmin'           | 0.914          |                    |              |

Correction method= # Reported T Limits: Tmin=0.554 Tmax=1.000  
AbsCorr = MULTI-SCAN

Data completeness= 0.999      Theta(max)= 24.999

R(reflections)= 0.0362( 2786)      wR2(reflections)= 0.0863( 3163)

S = 1.056      Npar= 244

---

The following ALERTS were generated. Each ALERT has the format

**test-name\_ALERT\_alert-type\_alert-level.**

Click on the hyperlinks for more details of the test.

---

**Alert level C**

PLAT761\_ALERT\_1\_C CIF Contains no X-H Bonds ..... Please Check  
PLAT762\_ALERT\_1\_C CIF Contains no X-Y-H or H-Y-H Angles ..... Please Check

---

**Alert level G**

PLAT003\_ALERT\_2\_G Number of Uiso or Uij Restrained non-H Atoms ... 27 Report  
PLAT005\_ALERT\_5\_G No Embedded Refinement Details Found in the CIF Please Do !  
PLAT042\_ALERT\_1\_G Calc. and Reported Moiety Formula Strings Differ Please Check  
PLAT045\_ALERT\_1\_G Calculated and Reported Z Differ by a Factor ... 2.00 Check  
PLAT398\_ALERT\_2\_G Deviating C-O-C Angle From 120 for O1 106.3 Degree  
PLAT793\_ALERT\_4\_G Model has Chirality at C1 (Centro SPGR) R Verify  
PLAT793\_ALERT\_4\_G Model has Chirality at C8 (Centro SPGR) R Verify  
PLAT793\_ALERT\_4\_G Model has Chirality at C10 (Centro SPGR) S Verify  
PLAT793\_ALERT\_4\_G Model has Chirality at C17 (Centro SPGR) S Verify  
PLAT793\_ALERT\_4\_G Model has Chirality at C24 (Centro SPGR) S Verify  
PLAT860\_ALERT\_3\_G Number of Least-Squares Restraints ..... 768 Note

---

0 **ALERT level A** = Most likely a serious problem - resolve or explain  
0 **ALERT level B** = A potentially serious problem, consider carefully  
2 **ALERT level C** = Check. Ensure it is not caused by an omission or oversight  
11 **ALERT level G** = General information/check it is not something unexpected

4 ALERT type 1 CIF construction/syntax error, inconsistent or missing data  
2 ALERT type 2 Indicator that the structure model may be wrong or deficient  
1 ALERT type 3 Indicator that the structure quality may be low  
5 ALERT type 4 Improvement, methodology, query or suggestion  
1 ALERT type 5 Informative message, check

---

## checkCIF publication errors

---

**Alert level A**

PUBL004\_ALERT\_1\_A The contact author's name and address are missing,  
\_publ\_contact\_author\_name and \_publ\_contact\_author\_address.  
PUBL005\_ALERT\_1\_A \_publ\_contact\_author\_email, \_publ\_contact\_author\_fax and  
\_publ\_contact\_author\_phone are all missing.  
At least one of these should be present.  
PUBL006\_ALERT\_1\_A \_publ\_requested\_journal is missing  
e.g. 'Acta Crystallographica Section C'  
PUBL008\_ALERT\_1\_A \_publ\_section\_title is missing. Title of paper.  
PUBL009\_ALERT\_1\_A \_publ\_author\_name is missing. List of author(s) name(s).  
PUBL010\_ALERT\_1\_A \_publ\_author\_address is missing. Author(s) address(es).  
PUBL012\_ALERT\_1\_A \_publ\_section\_abstract is missing.  
Abstract of paper in English.

---

7 **ALERT level A** = Data missing that is essential or data in wrong format  
0 **ALERT level G** = General alerts. Data that may be required is missing

---

## Publication of your CIF

You should attempt to resolve as many as possible of the alerts in all categories. Often the minor alerts point to easily fixed oversights, errors and omissions in your CIF or refinement strategy, so attention to these fine details can be worthwhile. In order to resolve some of the more serious problems it may be necessary to carry out additional measurements or structure refinements. However, the nature of your study may justify the reported deviations from journal submission requirements and the more serious of these should be commented upon in the discussion or experimental section of a paper or in the "special\_details" fields of the CIF. *checkCIF* was carefully designed to identify outliers and unusual parameters, but every test has its limitations and alerts that are not important in a particular case may appear. Conversely, the absence of alerts does not guarantee there are no aspects of the results needing attention. It is up to the individual to critically assess their own results and, if necessary, seek expert advice.

If level A alerts remain, which you believe to be justified deviations, and you intend to submit this CIF for publication in a journal, you should additionally insert an explanation in your CIF using the Validation Reply Form (VRF) below. This will allow your explanation to be considered as part of the review process.

## Validation response form

Please find below a validation response form (VRF) that can be filled in and pasted into your CIF.

```
# start Validation Reply Form
_vrf_PUBL004_GLOBAL
;
PROBLEM: The contact author's name and address are missing,
RESPONSE: ...
;
_vrf_PUBL005_GLOBAL
;
PROBLEM: _publ_contact_author_email, _publ_contact_author_fax and
RESPONSE: ...
;
_vrf_PUBL006_GLOBAL
;
PROBLEM: _publ_requested_journal is missing
RESPONSE: ...
;
_vrf_PUBL008_GLOBAL
;
PROBLEM: _publ_section_title is missing. Title of paper.
RESPONSE: ...
;
_vrf_PUBL009_GLOBAL
;
PROBLEM: _publ_author_name is missing. List of author(s) name(s).
RESPONSE: ...
;
_vrf_PUBL010_GLOBAL
;
PROBLEM: _publ_author_address is missing. Author(s) address(es).
RESPONSE: ...
;
_vrf_PUBL012_GLOBAL
;
```

PROBLEM: \_publ\_section\_abstract is missing.  
RESPONSE: ...  
;  
# end Validation Reply Form

If you wish to submit your CIF for publication in Acta Crystallographica Section C or E, you should upload your CIF via the web. If you wish to submit your CIF for publication in IUCrData you should upload your CIF via the web. If your CIF is to form part of a submission to another IUCr journal, you will be asked, either during electronic submission or by the Co-editor handling your paper, to upload your CIF via our web site.

---

**PLATON version of 13/07/2021; check.def file version of 13/07/2021**

Datablock I - ellipsoid plot

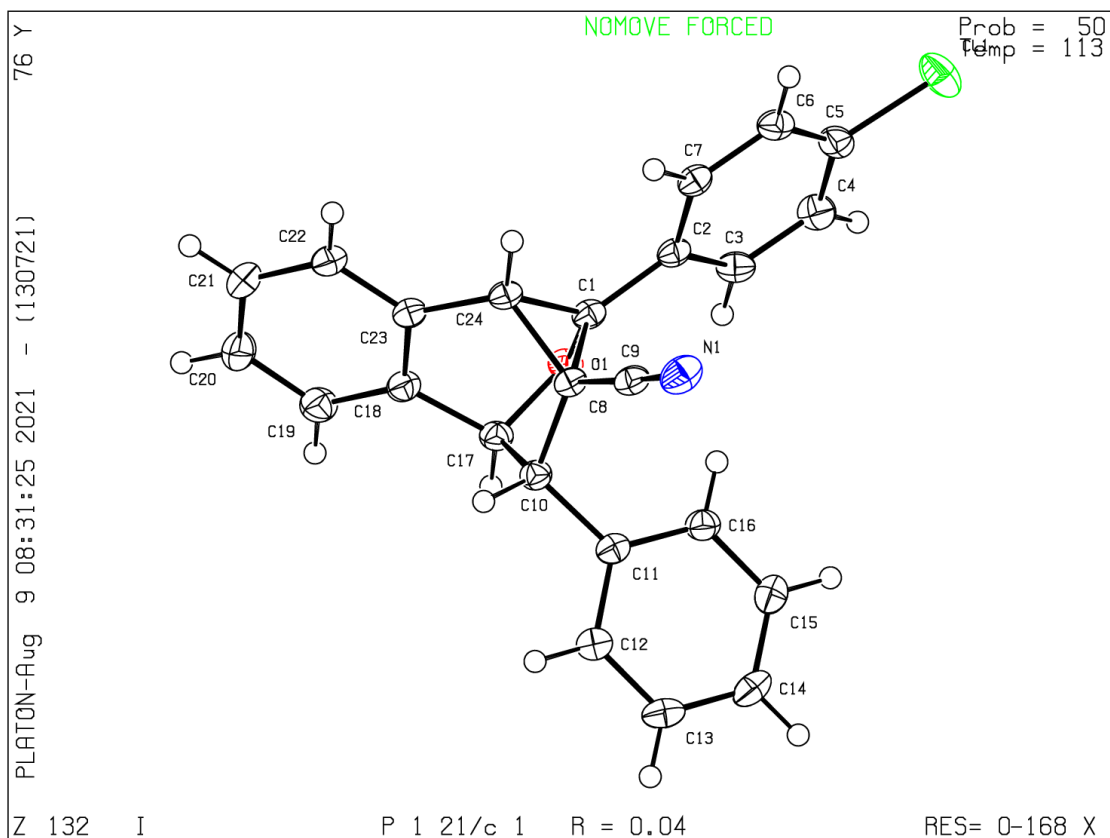





---

The following ALERTS were generated. Each ALERT has the format

**test-name\_ALERT\_alert-type\_alert-level.**

Click on the hyperlinks for more details of the test.

---

### Alert level G

|                   |                                                  |      |             |
|-------------------|--------------------------------------------------|------|-------------|
| PLAT003_ALERT_2_G | Number of Uiso or Uij Restrained non-H Atoms ... | 36   | Report      |
| PLAT005_ALERT_5_G | No Embedded Refinement Details Found in the CIF  |      | Please Do ! |
| PLAT793_ALERT_4_G | Model has Chirality at C8 (Centro SPGR)          | S    | Verify      |
| PLAT793_ALERT_4_G | Model has Chirality at C9 (Centro SPGR)          | S    | Verify      |
| PLAT793_ALERT_4_G | Model has Chirality at C10 (Centro SPGR)         | S    | Verify      |
| PLAT860_ALERT_3_G | Number of Least-Squares Restraints .....         | 1014 | Note        |

---

0 **ALERT level A** = Most likely a serious problem - resolve or explain  
0 **ALERT level B** = A potentially serious problem, consider carefully  
0 **ALERT level C** = Check. Ensure it is not caused by an omission or oversight  
6 **ALERT level G** = General information/check it is not something unexpected

0 ALERT type 1 CIF construction/syntax error, inconsistent or missing data  
1 ALERT type 2 Indicator that the structure model may be wrong or deficient  
1 ALERT type 3 Indicator that the structure quality may be low  
3 ALERT type 4 Improvement, methodology, query or suggestion  
1 ALERT type 5 Informative message, check

---

## checkCIF publication errors

---

### Alert level A

PUBL004\_ALERT\_1\_A The contact author's name and address are missing,  
\_publ\_contact\_author\_name and \_publ\_contact\_author\_address.  
PUBL005\_ALERT\_1\_A \_publ\_contact\_author\_email, \_publ\_contact\_author\_fax and  
\_publ\_contact\_author\_phone are all missing.  
At least one of these should be present.  
PUBL006\_ALERT\_1\_A \_publ\_requested\_journal is missing  
e.g. 'Acta Crystallographica Section C'  
PUBL008\_ALERT\_1\_A \_publ\_section\_title is missing. Title of paper.  
PUBL009\_ALERT\_1\_A \_publ\_author\_name is missing. List of author(s) name(s).  
PUBL010\_ALERT\_1\_A \_publ\_author\_address is missing. Author(s) address(es).  
PUBL012\_ALERT\_1\_A \_publ\_section\_abstract is missing.  
Abstract of paper in English.

---

7 **ALERT level A** = Data missing that is essential or data in wrong format  
0 **ALERT level G** = General alerts. Data that may be required is missing

---

## Publication of your CIF

You should attempt to resolve as many as possible of the alerts in all categories. Often the minor alerts point to easily fixed oversights, errors and omissions in your CIF or refinement strategy, so attention to these fine details can be worthwhile. In order to resolve some of the more serious problems it may be necessary to carry out additional measurements or structure refinements. However, the nature of your study may justify the reported deviations from journal submission requirements and the more serious of these should be commented upon in the discussion or experimental section of a paper or in the "special\_details" fields of the CIF. *checkCIF* was carefully designed to identify outliers and unusual parameters, but every test has its limitations and alerts that are not important in a particular case may appear. Conversely, the absence of alerts does not guarantee there are no aspects of the results needing attention. It is up to the individual to critically assess their own results and, if necessary, seek expert advice.

If level A alerts remain, which you believe to be justified deviations, and you intend to submit this CIF for publication in a journal, you should additionally insert an explanation in your CIF using the Validation Reply Form (VRF) below. This will allow your explanation to be considered as part of the review process.

## Validation response form

Please find below a validation response form (VRF) that can be filled in and pasted into your CIF.

```
# start Validation Reply Form
_vrf_PUBL004_GLOBAL
;
PROBLEM: The contact author's name and address are missing,
RESPONSE: ...
;
_vrf_PUBL005_GLOBAL
;
PROBLEM: _publ_contact_author_email, _publ_contact_author_fax and
RESPONSE: ...
;
_vrf_PUBL006_GLOBAL
;
PROBLEM: _publ_requested_journal is missing
RESPONSE: ...
;
_vrf_PUBL008_GLOBAL
;
PROBLEM: _publ_section_title is missing. Title of paper.
RESPONSE: ...
;
_vrf_PUBL009_GLOBAL
;
PROBLEM: _publ_author_name is missing. List of author(s) name(s).
RESPONSE: ...
;
_vrf_PUBL010_GLOBAL
;
PROBLEM: _publ_author_address is missing. Author(s) address(es).
```

```

RESPONSE: ...
;
_vrf_PUBL012_GLOBAL
;
PROBLEM: _publ_section_abstract is missing.
RESPONSE: ...
;
# end Validation Reply Form

```

If you wish to submit your CIF for publication in Acta Crystallographica Section C or E, you should upload your CIF via the web. If you wish to submit your CIF for publication in IUCrData you should upload your CIF via the web. If your CIF is to form part of a submission to another IUCr journal, you will be asked, either during electronic submission or by the Co-editor handling your paper, to upload your CIF via our web site.

**PLATON version of 13/07/2021; check.def file version of 13/07/2021**

Datablock I - ellipsoid plot

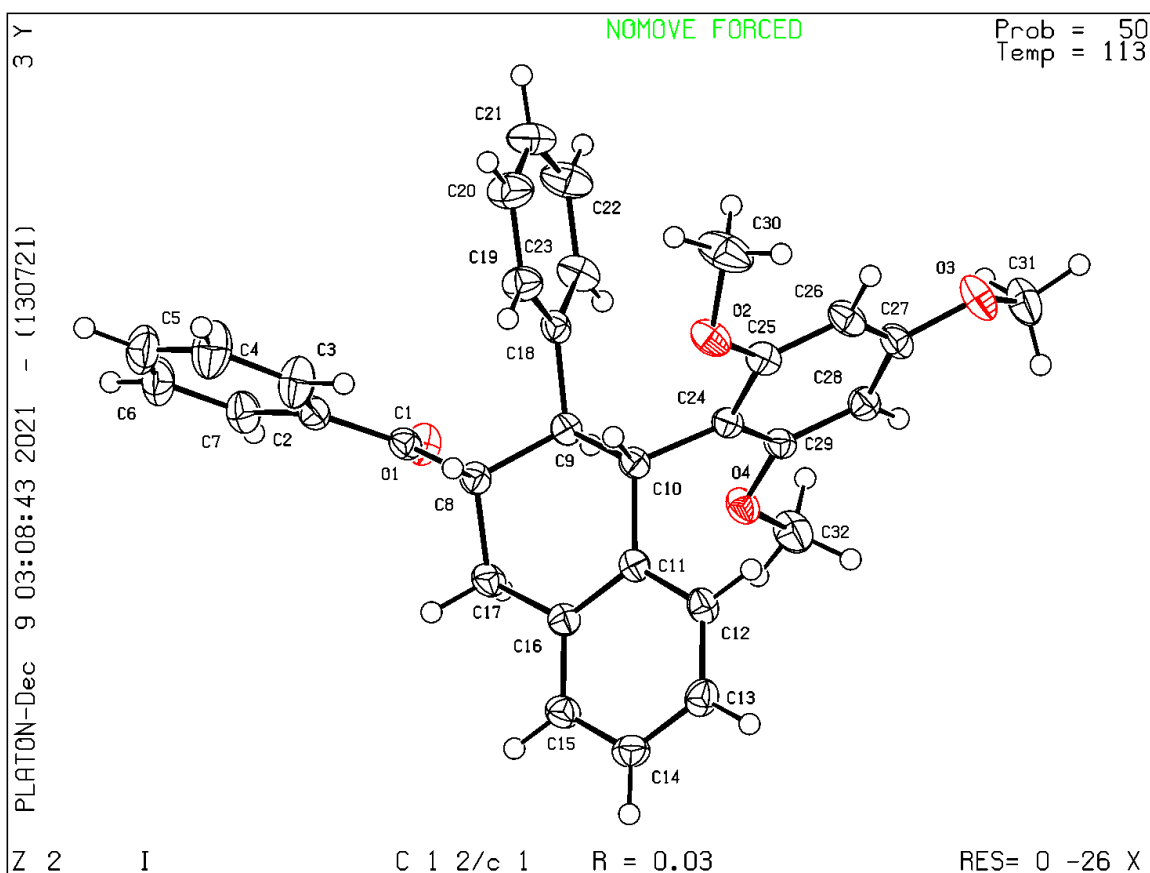



---

The following ALERTS were generated. Each ALERT has the format

**test-name\_ALERT\_alert-type\_alert-level.**

Click on the hyperlinks for more details of the test.

---

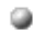

### Alert level G

|                   |                                                  |               |             |
|-------------------|--------------------------------------------------|---------------|-------------|
| PLAT003_ALERT_2_G | Number of Uiso or Uij Restrained non-H Atoms ... | 2             | Report      |
| PLAT005_ALERT_5_G | No Embedded Refinement Details Found in the CIF  |               | Please Do ! |
| PLAT398_ALERT_2_G | Deviating C-O-C Angle From 120 for O1            | 108.8         | Degree      |
| PLAT793_ALERT_4_G | Model has Chirality at C1                        | (Centro SPGR) | S Verify    |
| PLAT793_ALERT_4_G | Model has Chirality at C2                        | (Centro SPGR) | R Verify    |
| PLAT793_ALERT_4_G | Model has Chirality at C3                        | (Centro SPGR) | R Verify    |

---

- 0 **ALERT level A** = Most likely a serious problem - resolve or explain
- 0 **ALERT level B** = A potentially serious problem, consider carefully
- 0 **ALERT level C** = Check. Ensure it is not caused by an omission or oversight
- 6 **ALERT level G** = General information/check it is not something unexpected

- 0 ALERT type 1 CIF construction/syntax error, inconsistent or missing data
  - 2 ALERT type 2 Indicator that the structure model may be wrong or deficient
  - 0 ALERT type 3 Indicator that the structure quality may be low
  - 3 ALERT type 4 Improvement, methodology, query or suggestion
  - 1 ALERT type 5 Informative message, check
- 

## checkCIF publication errors

---

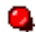

### Alert level A

PUBL004\_ALERT\_1\_A The contact author's name and address are missing,  
\_publ\_contact\_author\_name and \_publ\_contact\_author\_address.

PUBL005\_ALERT\_1\_A \_publ\_contact\_author\_email, \_publ\_contact\_author\_fax and  
\_publ\_contact\_author\_phone are all missing.  
At least one of these should be present.

PUBL006\_ALERT\_1\_A \_publ\_requested\_journal is missing  
e.g. 'Acta Crystallographica Section C'

PUBL008\_ALERT\_1\_A \_publ\_section\_title is missing. Title of paper.

PUBL009\_ALERT\_1\_A \_publ\_author\_name is missing. List of author(s) name(s).

PUBL010\_ALERT\_1\_A \_publ\_author\_address is missing. Author(s) address(es).

PUBL012\_ALERT\_1\_A \_publ\_section\_abstract is missing.  
Abstract of paper in English.

---

- 7 **ALERT level A** = Data missing that is essential or data in wrong format
  - 0 **ALERT level G** = General alerts. Data that may be required is missing
-

## Publication of your CIF

You should attempt to resolve as many as possible of the alerts in all categories. Often the minor alerts point to easily fixed oversights, errors and omissions in your CIF or refinement strategy, so attention to these fine details can be worthwhile. In order to resolve some of the more serious problems it may be necessary to carry out additional measurements or structure refinements. However, the nature of your study may justify the reported deviations from journal submission requirements and the more serious of these should be commented upon in the discussion or experimental section of a paper or in the "special\_details" fields of the CIF. *checkCIF* was carefully designed to identify outliers and unusual parameters, but every test has its limitations and alerts that are not important in a particular case may appear. Conversely, the absence of alerts does not guarantee there are no aspects of the results needing attention. It is up to the individual to critically assess their own results and, if necessary, seek expert advice.

If level A alerts remain, which you believe to be justified deviations, and you intend to submit this CIF for publication in a journal, you should additionally insert an explanation in your CIF using the Validation Reply Form (VRF) below. This will allow your explanation to be considered as part of the review process.

## Validation response form

Please find below a validation response form (VRF) that can be filled in and pasted into your CIF.

```
# start Validation Reply Form
_vrf_PUBL004_GLOBAL
;
PROBLEM: The contact author's name and address are missing,
RESPONSE: ...
;
_vrf_PUBL005_GLOBAL
;
PROBLEM: _publ_contact_author_email, _publ_contact_author_fax and
RESPONSE: ...
;
_vrf_PUBL006_GLOBAL
;
PROBLEM: _publ_requested_journal is missing
RESPONSE: ...
;
_vrf_PUBL008_GLOBAL
;
PROBLEM: _publ_section_title is missing. Title of paper.
RESPONSE: ...
;
_vrf_PUBL009_GLOBAL
;
PROBLEM: _publ_author_name is missing. List of author(s) name(s).
RESPONSE: ...
;
_vrf_PUBL010_GLOBAL
;
PROBLEM: _publ_author_address is missing. Author(s) address(es).
```

```
RESPONSE: ...
;
_vrf_PUBL012_GLOBAL
;
PROBLEM: _publ_section_abstract is missing.
RESPONSE: ...
;
# end Validation Reply Form
```

If you wish to submit your CIF for publication in Acta Crystallographica Section C or E, you should upload your CIF via the web. If you wish to submit your CIF for publication in IUCrData you should upload your CIF via the web. If your CIF is to form part of a submission to another IUCr journal, you will be asked, either during electronic submission or by the Co-editor handling your paper, to upload your CIF via our web site.

---

**PLATON version of 19/02/2022; check.def file version of 19/01/2022**

Datablock I - ellipsoid plot

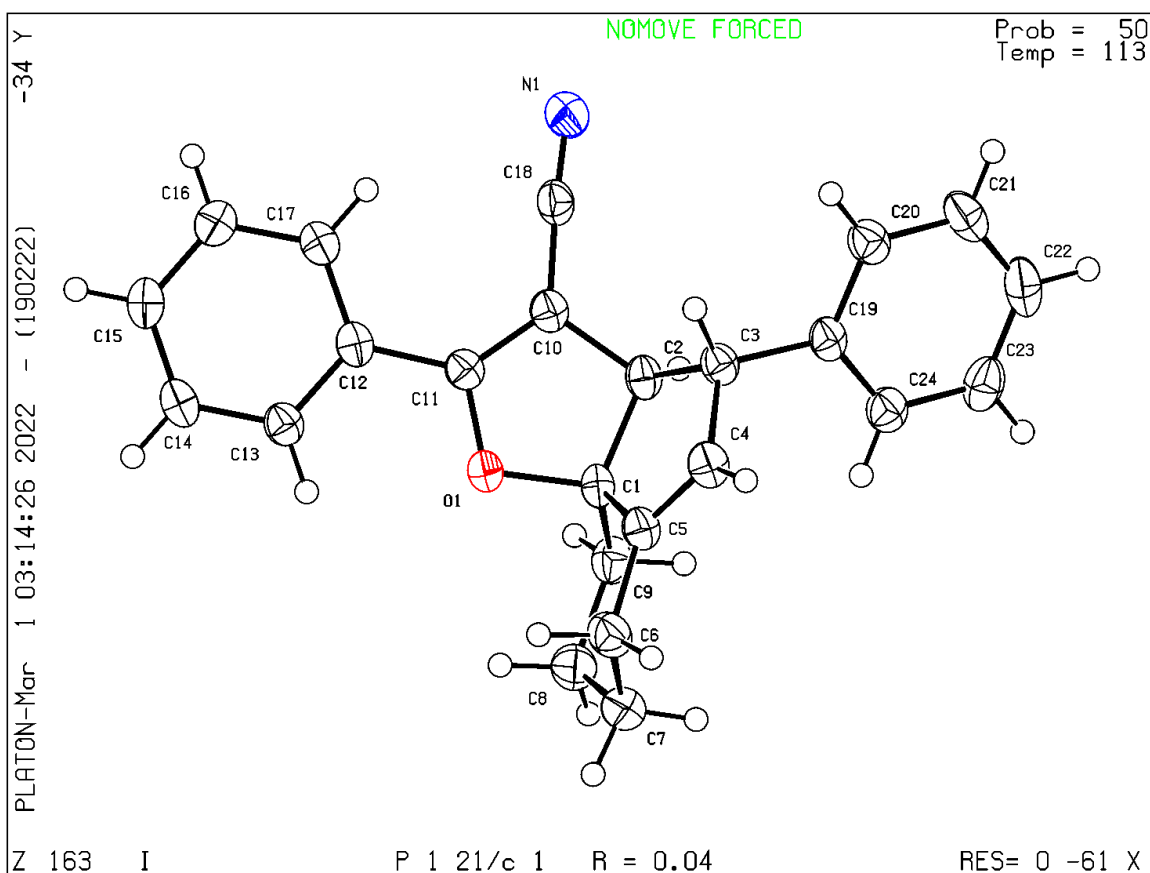

Supplement: d3cc01021j1.pdf [file d3cc01021j1.pdf]
